# Supplementary material for: A Great Barrier Reef Sinularia sp. Yields Two New Cytotoxic Diterpenes
Source: PubMed Central journal article supplement (PMC3447330; doi:10.3390/md10081619), 2012-07-31
Supplement: marinedrugs-10-01619-s001.pdf [file marinedrugs-10-01619-s001.pdf]

## Supplementary Information

### Table of Contents.

|                                                                                                                                                                                 | Page No |
|---------------------------------------------------------------------------------------------------------------------------------------------------------------------------------|---------|
| Compound <b>1</b> : (4 <i>R</i> *,5 <i>R</i> *,9 <i>S</i> *,10 <i>R</i> *,11 <i>Z</i> )-4-methoxy-12,15-epoxy-11(13)-en-9-((dimethylamino)-methyl)-decadehydronaphthalen-16-ol. |         |
| Compound <b>2</b> : (1 <i>R</i> *,2 <i>R</i> *,4 <i>S</i> *,15 <i>E</i> )-loba-8,10,13(14),15(16)-tetraen-17,18-diol-17-acetate                                                 |         |
| Figure S1. <sup>1</sup> H NMR spectrum (300 MHz) of ( <b>1</b> ) in CD <sub>3</sub> OD.....                                                                                     | 5       |
| Figure S2. <sup>13</sup> C NMR spectrum (75 MHz) of ( <b>1</b> ) in CD <sub>3</sub> OD.....                                                                                     | 6       |
| Figure S3. DEPT spectrum (75 MHz) of ( <b>1</b> ) in CD <sub>3</sub> OD.....                                                                                                    | 7       |
| Figure S4. COSY spectrum (300 MHz) of ( <b>1</b> ) in CD <sub>3</sub> OD.....                                                                                                   | 8       |
| Figure S5. HSQC spectrum (300 MHz) of ( <b>1</b> ) in CD <sub>3</sub> OD. ....                                                                                                  | 9       |
| Figure S6. HMBC spectrum (300 MHz) of ( <b>1</b> ) in CD <sub>3</sub> OD.....                                                                                                   | 10      |
| Figure S7. Selective NOESY spectrum (300 MHz; 4.16 ppm) of ( <b>1</b> ) in CD <sub>3</sub> OD .....                                                                             | 11      |
| Figure S8. Selective NOESY spectrum (300 MHz; 3.25 ppm) of ( <b>1</b> ) in CD <sub>3</sub> OD .....                                                                             | 12      |
| Figure S9. Selective NOESY spectrum (300 MHz; 3.16 ppm) of ( <b>1</b> ) in CD <sub>3</sub> OD .....                                                                             | 13      |
| Figure S10. Selective NOESY spectrum (300 MHz; 1.08 ppm) of ( <b>1</b> ) in CD <sub>3</sub> OD .....                                                                            | 14      |
| Figure S11. Selective NOESY spectrum (300 MHz; 0.89 ppm) of ( <b>1</b> ) in CD <sub>3</sub> OD .....                                                                            | 15      |
| Figure S12. <sup>1</sup> H NMR spectrum (300 MHz) of ( <b>2</b> ) in CD <sub>3</sub> OD.....                                                                                    | 16      |
| Figure S13. <sup>13</sup> C NMR spectrum (75 MHz) of ( <b>2</b> ) in CD <sub>3</sub> OD.....                                                                                    | 17      |
| Figure S14. DEPT spectrum (75 MHz) of ( <b>2</b> ) in CD <sub>3</sub> OD.....                                                                                                   | 18      |
| Figure S15. COSY spectrum (300 MHz) of ( <b>2</b> ) in CD <sub>3</sub> OD.....                                                                                                  | 19      |
| Figure S16. HSQC spectrum (300 MHz) of ( <b>2</b> ) in CD <sub>3</sub> OD. ....                                                                                                 | 20      |
| Figure S17. HMBC spectrum (300 MHz) of ( <b>2</b> ) in CD <sub>3</sub> OD.....                                                                                                  | 21      |

|                                                                                                                                                |    |
|------------------------------------------------------------------------------------------------------------------------------------------------|----|
| Figure S18. Selective NOESY spectrum (300 MHz; 5.14 ppm) of <b>(2)</b> in CD <sub>3</sub> OD .....                                             | 22 |
| Figure S19. Selective NOESY spectrum (300 MHz; 2.31 ppm) of <b>(2)</b> in CD <sub>3</sub> OD .....                                             | 23 |
| Figure S20. Selective NOESY spectrum (300 MHz; 2.09 ppm) of <b>(2)</b> in CD <sub>3</sub> OD .....                                             | 24 |
| Figure S21. Selective NOESY spectrum (300 MHz; 1.71 ppm) of <b>(2)</b> in CD <sub>3</sub> OD .....                                             | 25 |
| Figure S22. Selective NOESY spectrum (300 MHz; 1.03 ppm) of <b>(2)</b> in CD <sub>3</sub> OD .....                                             | 26 |
| Scheme 1: Structures of known compounds isolated from <i>Sinularia</i> sp. ....                                                                | 27 |
| Figure S23. <sup>1</sup> H NMR spectrum (300 MHz) of loba-8,10,13(15)-triene-16,17,18-triol in CD <sub>3</sub> OD.....                         | 28 |
| Figure S24. <sup>13</sup> C NMR spectrum (75 MHz) of loba-8,10,13(15)-triene-16,17,18-triol in CD <sub>3</sub> OD.....                         | 29 |
| Figure S25. DEPT spectrum (75 MHz) of loba-8,10,13(15)-triene-16,17,18-triol in CD <sub>3</sub> OD.....                                        | 30 |
| Figure S26. COSY spectrum (300 MHz) of loba-8,10,13(15)-triene-16,17,18-triol in CD <sub>3</sub> OD.....                                       | 31 |
| Figure S27. HSQC spectrum (300 MHz) of loba-8,10,13(15)-triene-16,17,18-triol in CD <sub>3</sub> OD. ....                                      | 32 |
| Figure S28. HMBC spectrum (300 MHz) of loba-8,10,13(15)-triene-16,17,18-triol in CD <sub>3</sub> OD.....                                       | 33 |
| Figure S29. Selective NOESY spectrum (300 MHz; 4.65 ppm) of loba-8,10,13(15)-triene-16,17,18-triol in CD <sub>3</sub> OD .....                 | 34 |
| Figure S30. Selective NOESY spectrum (300 MHz; 3.15 ppm) of loba-8,10,13(15)-triene-16,17,18-triol in CD <sub>3</sub> OD .....                 | 35 |
| Figure S31. Selective NOESY spectrum (300 MHz; 1.74 ppm) of loba-8,10,13(15)-triene-16,17,18-triol in CD <sub>3</sub> OD .....                 | 36 |
| Figure S32. Selective NOESY spectrum (300 MHz; 1.71 ppm) of loba-8,10,13(15)-triene-16,17,18-triol in CD <sub>3</sub> OD .....                 | 37 |
| Figure S33. Selective NOESY spectrum (300 MHz; 1.25 ppm) of loba-8,10,13(15)-triene-16,17,18-triol in CD <sub>3</sub> OD .....                 | 38 |
| Figure S34. Selective NOESY spectrum (300 MHz; 1.23 ppm) of loba-8,10,13(15)-triene-16,17,18-triol in CD <sub>3</sub> OD .....                 | 39 |
| Figure S35. Selective NOESY spectrum (300 MHz; 1.02 ppm) of loba-8,10,13(15)-triene-16,17,18-triol in CD <sub>3</sub> OD .....                 | 40 |
| Table S1. <sup>1</sup> H and <sup>13</sup> C NMR data (300 MHz and 75 MHz, CD <sub>3</sub> OD) for loba-8,10,13(15)-triene-16,17,18-triol..... | 41 |
| Figure S36. <sup>1</sup> H NMR spectrum (300 MHz) of lobatrienolide in CD <sub>3</sub> OD.....                                                 | 42 |
| Figure S37. <sup>13</sup> C NMR spectrum (75 MHz) of lobatrienolide in CD <sub>3</sub> OD.....                                                 | 43 |
| Figure S38. DEPT spectrum (75 MHz) of lobatrienolide in CD <sub>3</sub> OD.....                                                                | 44 |
| Figure S39. COSY spectrum (75 MHz) of lobatrienolide in CD <sub>3</sub> OD.....                                                                | 45 |
| Figure S40. HSQC spectrum (300 MHz) of lobatrienolide in CD <sub>3</sub> OD.....                                                               | 46 |
| Figure S41. HMBC spectrum (300 MHz) of lobatrienolide in CD <sub>3</sub> OD.....                                                               | 47 |
| Table S2. <sup>1</sup> H and <sup>13</sup> C NMR data (300 MHz and 75 MHz, CD <sub>3</sub> OD) for lobatrienolide.....                         | 48 |
| Figure S42. <sup>1</sup> H NMR spectrum (300 MHz) of lobatrienolide in CD <sub>3</sub> OD.....                                                 | 49 |

|                                                                                                                                                               |    |
|---------------------------------------------------------------------------------------------------------------------------------------------------------------|----|
| Figure S43. $^{13}\text{C}$ NMR spectrum (75 MHz) of lobatrientriol in $\text{CD}_3\text{OD}$ .....                                                           | 50 |
| Figure S44. COSY spectrum (300 MHz) of lobatrientriol in $\text{CD}_3\text{OD}$ .....                                                                         | 51 |
| Figure S45. HSQC spectrum (300 MHz) of lobatrientriol in $\text{CD}_3\text{OD}$ .....                                                                         | 52 |
| Figure S46. HMBC spectrum (300 MHz) of lobatrientriol in $\text{CD}_3\text{OD}$ .....                                                                         | 53 |
| Table S3. $^1\text{H}$ and $^{13}\text{C}$ NMR data (300 MHz and 75 MHz, $\text{CDCl}_3$ ) for lobatrientriol.....                                            | 54 |
| Figure S47. $^1\text{H}$ NMR spectrum (300 MHz) of 14,18-epoxyloba-8,10,13(15)-trien-17-ol in $\text{CD}_3\text{OD}$ .....                                    | 55 |
| Figure S48. $^{13}\text{C}$ NMR spectrum (75 MHz) of 14,18-epoxyloba-8,10,13(15)-trien-17-ol in $\text{CD}_3\text{OD}$ .....                                  | 56 |
| Figure S49. DEPT spectrum (75 MHz) of 14,18-epoxyloba-8,10,13(15)-trien-17-ol in $\text{CD}_3\text{OD}$ .....                                                 | 57 |
| Figure S50. COSY spectrum (300 MHz) of 14,18-epoxyloba-8,10,13(15)-trien-17-ol in $\text{CD}_3\text{OD}$ .....                                                | 58 |
| Figure S51. HSQC spectrum (300 MHz) of 14,18-epoxyloba-8,10,13(15)-trien-17-ol in $\text{CD}_3\text{OD}$ .....                                                | 59 |
| Figure S52. HMBC spectrum (300 MHz) of 14,18-epoxyloba-8,10,13(15)-trien-17-ol in $\text{CD}_3\text{OD}$ .....                                                | 60 |
| Table S4. $^1\text{H}$ and $^{13}\text{C}$ NMR data (300 MHz and 75 MHz, $\text{CD}_3\text{OD}$ ) for 14,18-epoxyloba-8,10,13(15)-trien-17-ol.....            | 61 |
| Figure S53. $^1\text{H}$ NMR spectrum (300 MHz) of 14,17-epoxyloba-8,10,13(15)-trien-18-ol-18-acetate in $\text{CD}_3\text{OD}$ .....                         | 62 |
| Figure S54. $^{13}\text{C}$ NMR spectrum (75 MHz) of 14,17-epoxyloba-8,10,13(15)-trien-18-ol-18-acetate in $\text{CD}_3\text{OD}$ .....                       | 63 |
| Figure S55. DEPT spectrum (75 MHz) of 14,17-epoxyloba-8,10,13(15)-trien-18-ol-18-acetate in $\text{CD}_3\text{OD}$ .....                                      | 64 |
| Figure S56. COSY spectrum (300 MHz) of 14,17-epoxyloba-8,10,13(15)-trien-18-ol-18-acetate in $\text{CD}_3\text{OD}$ .....                                     | 65 |
| Figure S57. HSQC spectrum (300 MHz) of 14,17-epoxyloba-8,10,13(15)-trien-18-ol-18-acetate in $\text{CD}_3\text{OD}$ .....                                     | 66 |
| Figure S58. HMBC spectrum (300 MHz) of 14,17-epoxyloba-8,10,13(15)-trien-18-ol-18-acetate in $\text{CD}_3\text{OD}$ .....                                     | 67 |
| Table S5. $^1\text{H}$ and $^{13}\text{C}$ NMR data (300 MHz and 75 MHz, $\text{CD}_3\text{OD}$ ) for 14,17-epoxyloba-8,10,13(15)-trien-18-ol-18-acetate..... | 68 |
| Figure S59. $^1\text{H}$ NMR spectrum (300 MHz) of (17 <i>R</i> )-loba-8,10,13(15)-trien-17,18-diol in $\text{CD}_3\text{OD}$ .....                           | 69 |
| Figure S60. $^{13}\text{C}$ NMR spectrum (75 MHz) of (17 <i>R</i> )-loba-8,10,13(15)-trien-17,18-diol in $\text{CD}_3\text{OD}$ .....                         | 70 |
| Figure S61. COSY spectrum (300 MHz) of (17 <i>R</i> )-loba-8,10,13(15)-trien-17,18-diol in $\text{CD}_3\text{OD}$ .....                                       | 71 |
| Figure S62. HSQC spectrum (300 MHz) of (17 <i>R</i> )-loba-8,10,13(15)-trien-17,18-diol in $\text{CD}_3\text{OD}$ .....                                       | 72 |
| Figure S63. HMBC spectrum (300 MHz) of (17 <i>R</i> )-loba-8,10,13(15)-trien-17,18-diol in $\text{CD}_3\text{OD}$ .....                                       | 73 |
| Table S6. $^1\text{H}$ and $^{13}\text{C}$ NMR data (300 MHz and 75 MHz, $\text{CD}_3\text{OD}$ ) for (17 <i>R</i> )-loba-8,10,13(15)-trien-17,18-diol .....  | 74 |
| Figure S64. $^1\text{H}$ NMR spectrum (300 MHz) of sarcophytol-B in $\text{CD}_3\text{OD}$ .....                                                              | 75 |
| Figure S65. $^{13}\text{C}$ NMR spectrum (75 MHz) of sarcophytol-B in $\text{CD}_3\text{OD}$ .....                                                            | 76 |
| Figure S66. DEPT spectrum (75 MHz) of sarcophytol-B in $\text{CD}_3\text{OD}$ .....                                                                           | 77 |

|                                                                                                                                                                           |    |
|---------------------------------------------------------------------------------------------------------------------------------------------------------------------------|----|
| Figure S67. COSY spectrum (300 MHz) of sarcophytol-B in CD <sub>3</sub> OD.....                                                                                           | 78 |
| Figure S68. HSQC spectrum (300 MHz) of sarcophytol-B in CD <sub>3</sub> OD.....                                                                                           | 79 |
| Figure S69. HMBC spectrum (300 MHz) of sarcophytol-B in CD <sub>3</sub> OD.....                                                                                           | 80 |
| Table S7. <sup>1</sup> H and <sup>13</sup> C NMR data (300 MHz and 75 MHz, CD <sub>3</sub> OD) for sarcophytol-B.....                                                     | 81 |
| Figure S70. <sup>1</sup> H NMR spectrum (300 MHz) of (1 <i>E</i> ,3 <i>E</i> ,7 <i>E</i> )-11,12-epoxycebratrien-15-ol in CD <sub>3</sub> OD.....                         | 82 |
| Figure S71. <sup>13</sup> C NMR spectrum (75 MHz) of 11(1 <i>E</i> ,3 <i>E</i> ,7 <i>E</i> )-11,12-epoxycebratrien-15-ol in CD <sub>3</sub> OD.....                       | 83 |
| Figure S72. DEPT spectrum (75 MHz) of (1 <i>E</i> ,3 <i>E</i> ,7 <i>E</i> )-11,12-epoxycebratrien-15-ol in CD <sub>3</sub> OD.....                                        | 84 |
| Figure S73. COSY spectrum (300 MHz) of (1 <i>E</i> ,3 <i>E</i> ,7 <i>E</i> )-11,12-epoxycebratrien-15-ol in CD <sub>3</sub> OD.....                                       | 85 |
| Figure S74. HSQC spectrum (300 MHz) of (1 <i>E</i> ,3 <i>E</i> ,7 <i>E</i> )-11,12-epoxycebratrien-15-ol in CD <sub>3</sub> OD.....                                       | 86 |
| Figure S75. HMBC spectrum (300 MHz) of (1 <i>E</i> ,3 <i>E</i> ,7 <i>E</i> )-11,12-epoxycebratrien-15-ol in CD <sub>3</sub> OD.....                                       | 87 |
| Table S8. <sup>1</sup> H and <sup>13</sup> C NMR data (300 MHz and 75 MHz, CD <sub>3</sub> OD) for (1 <i>E</i> ,3 <i>E</i> ,7 <i>E</i> )-11,12-epoxycebratrien-15-ol..... | 88 |

S1. <sup>1</sup>H NMR of 1 in CD<sub>3</sub>OD

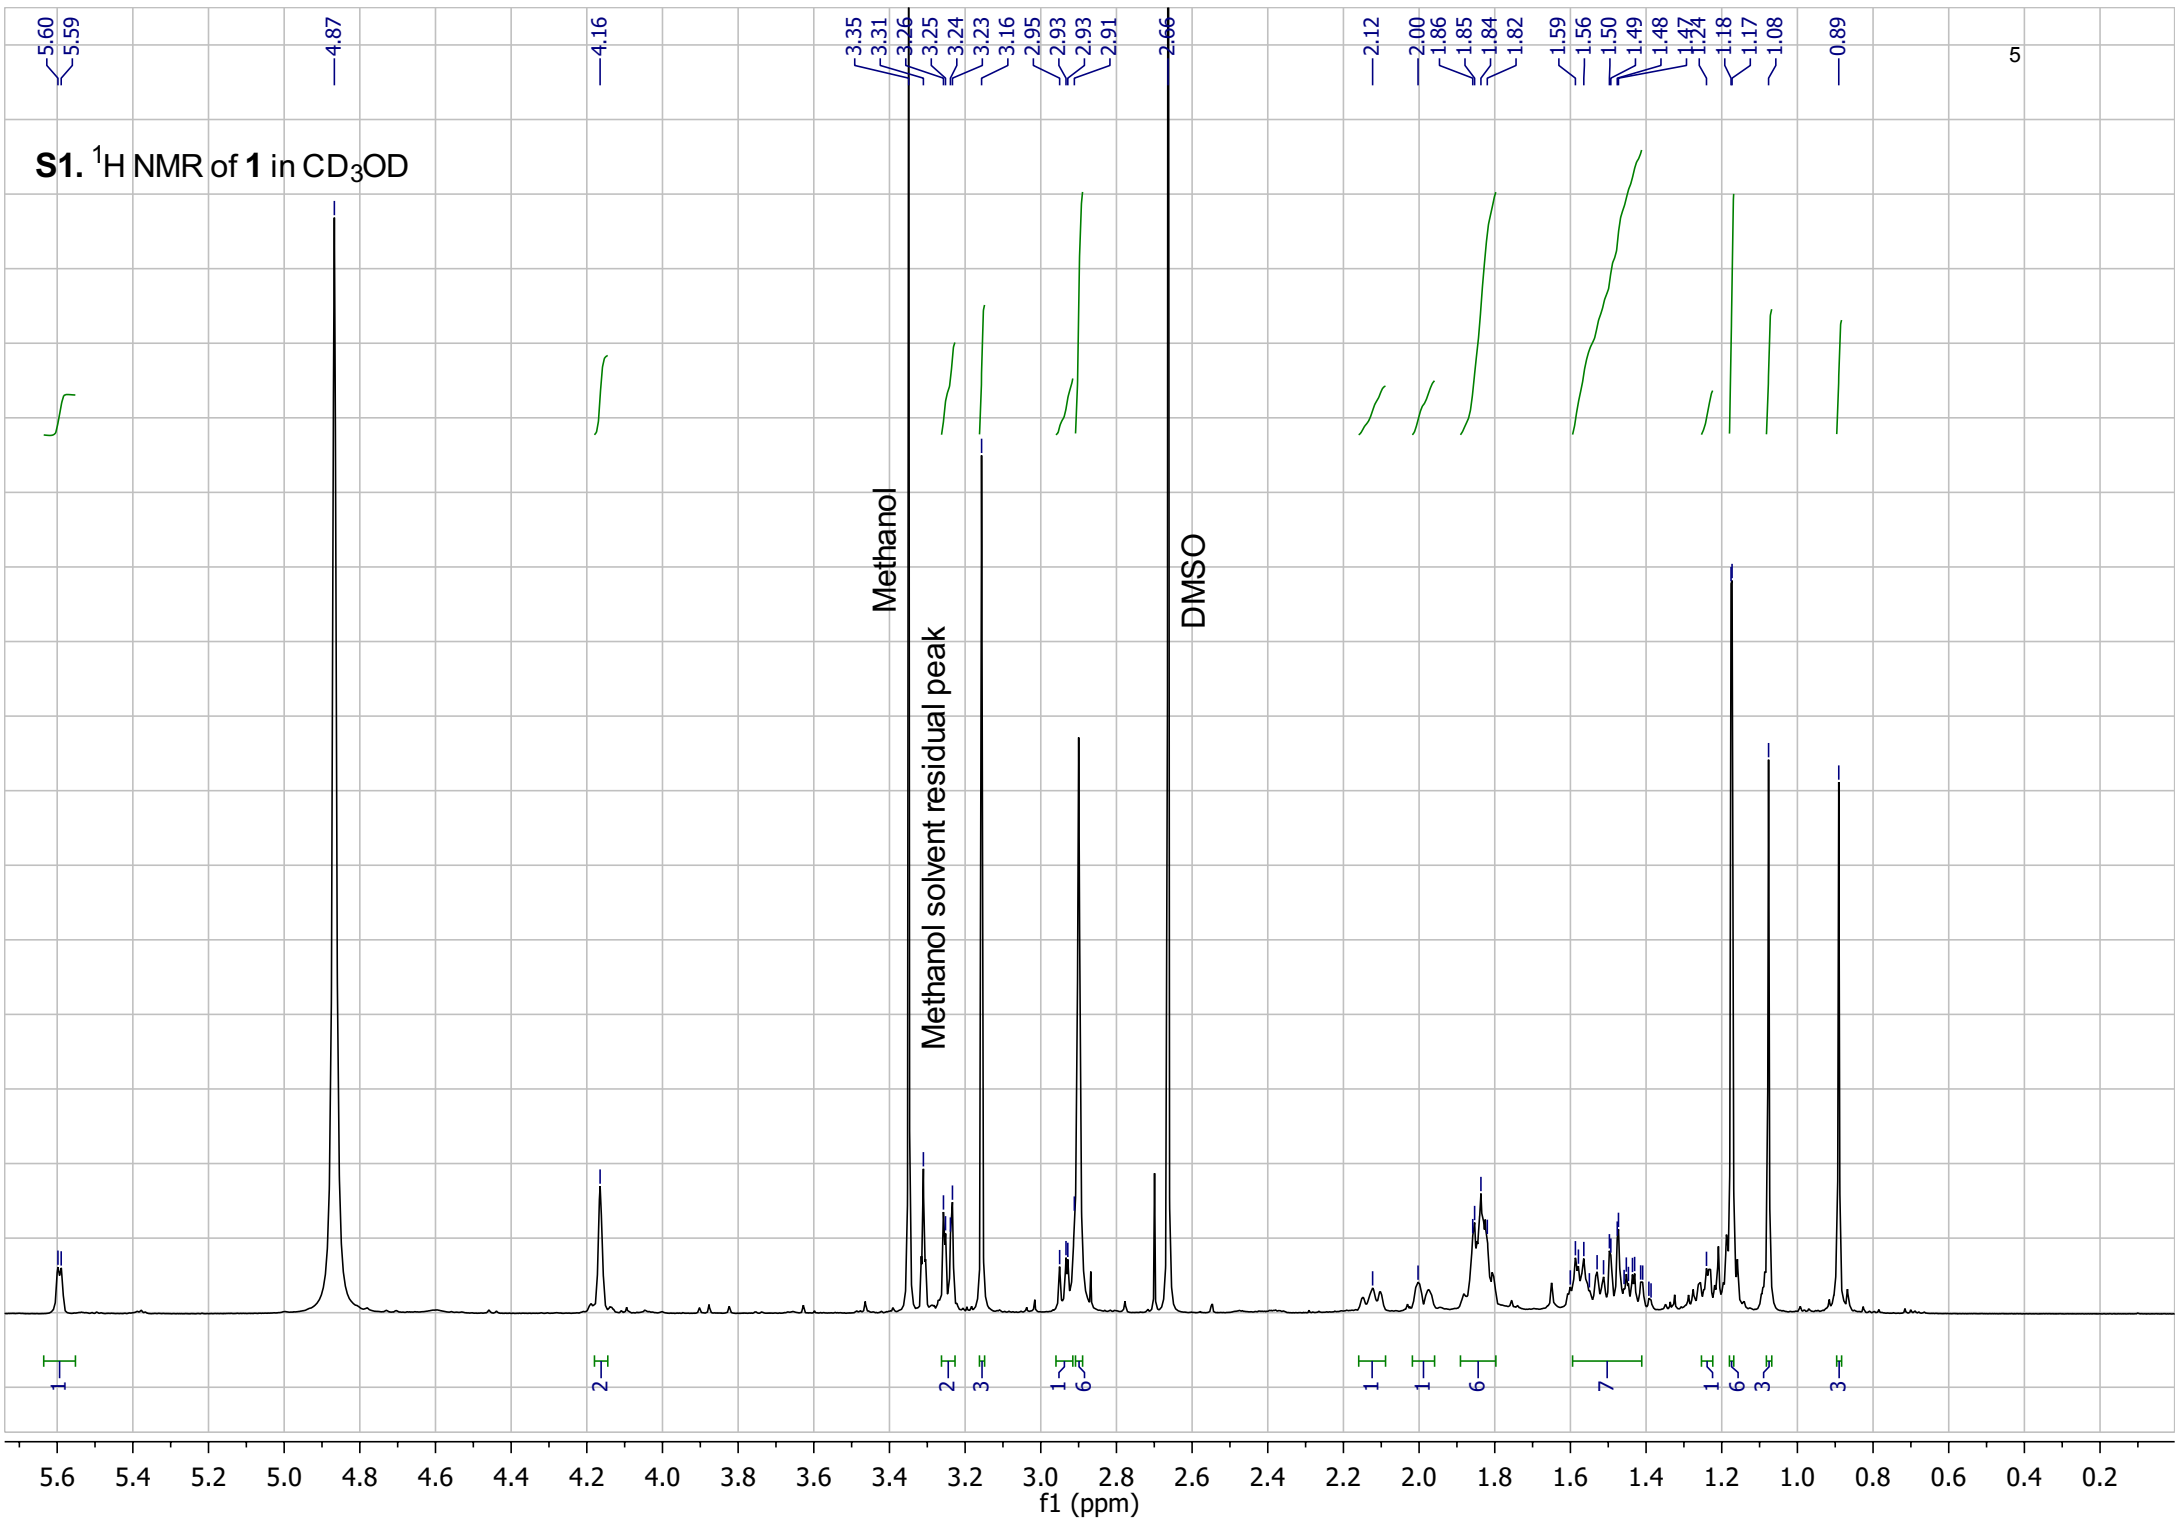

S2. <sup>13</sup>C NMR of **1** in CD<sub>3</sub>OD

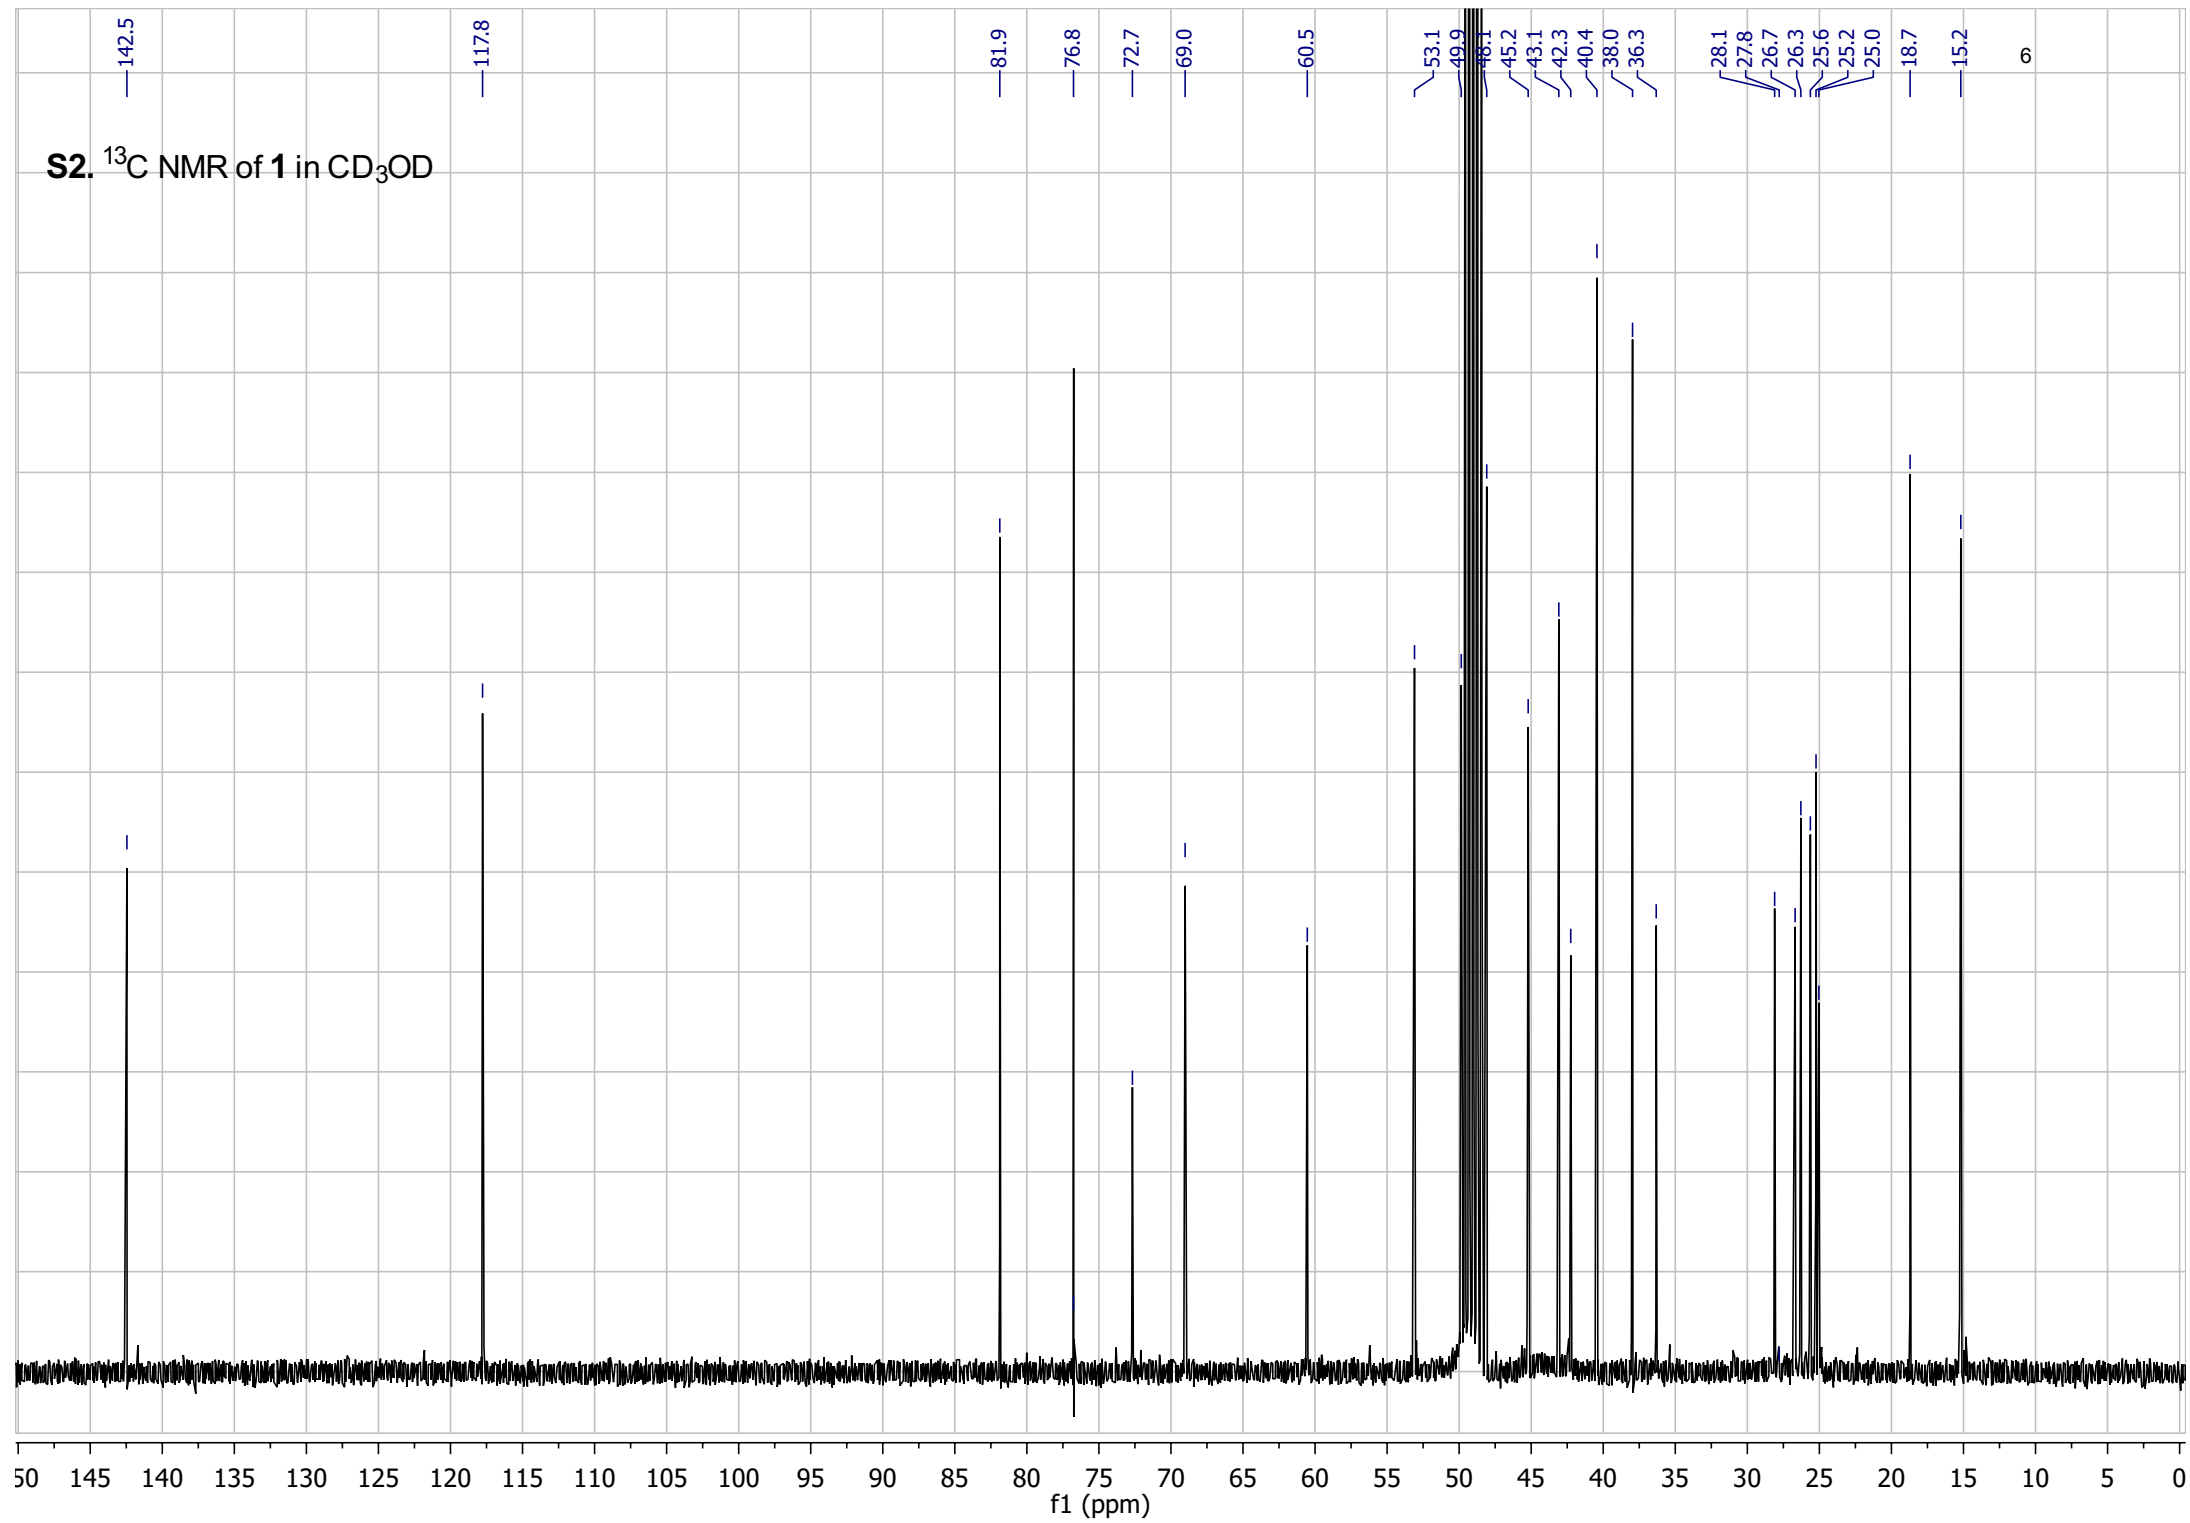

S3. DEPT NMR of 1 in CD<sub>3</sub>OD

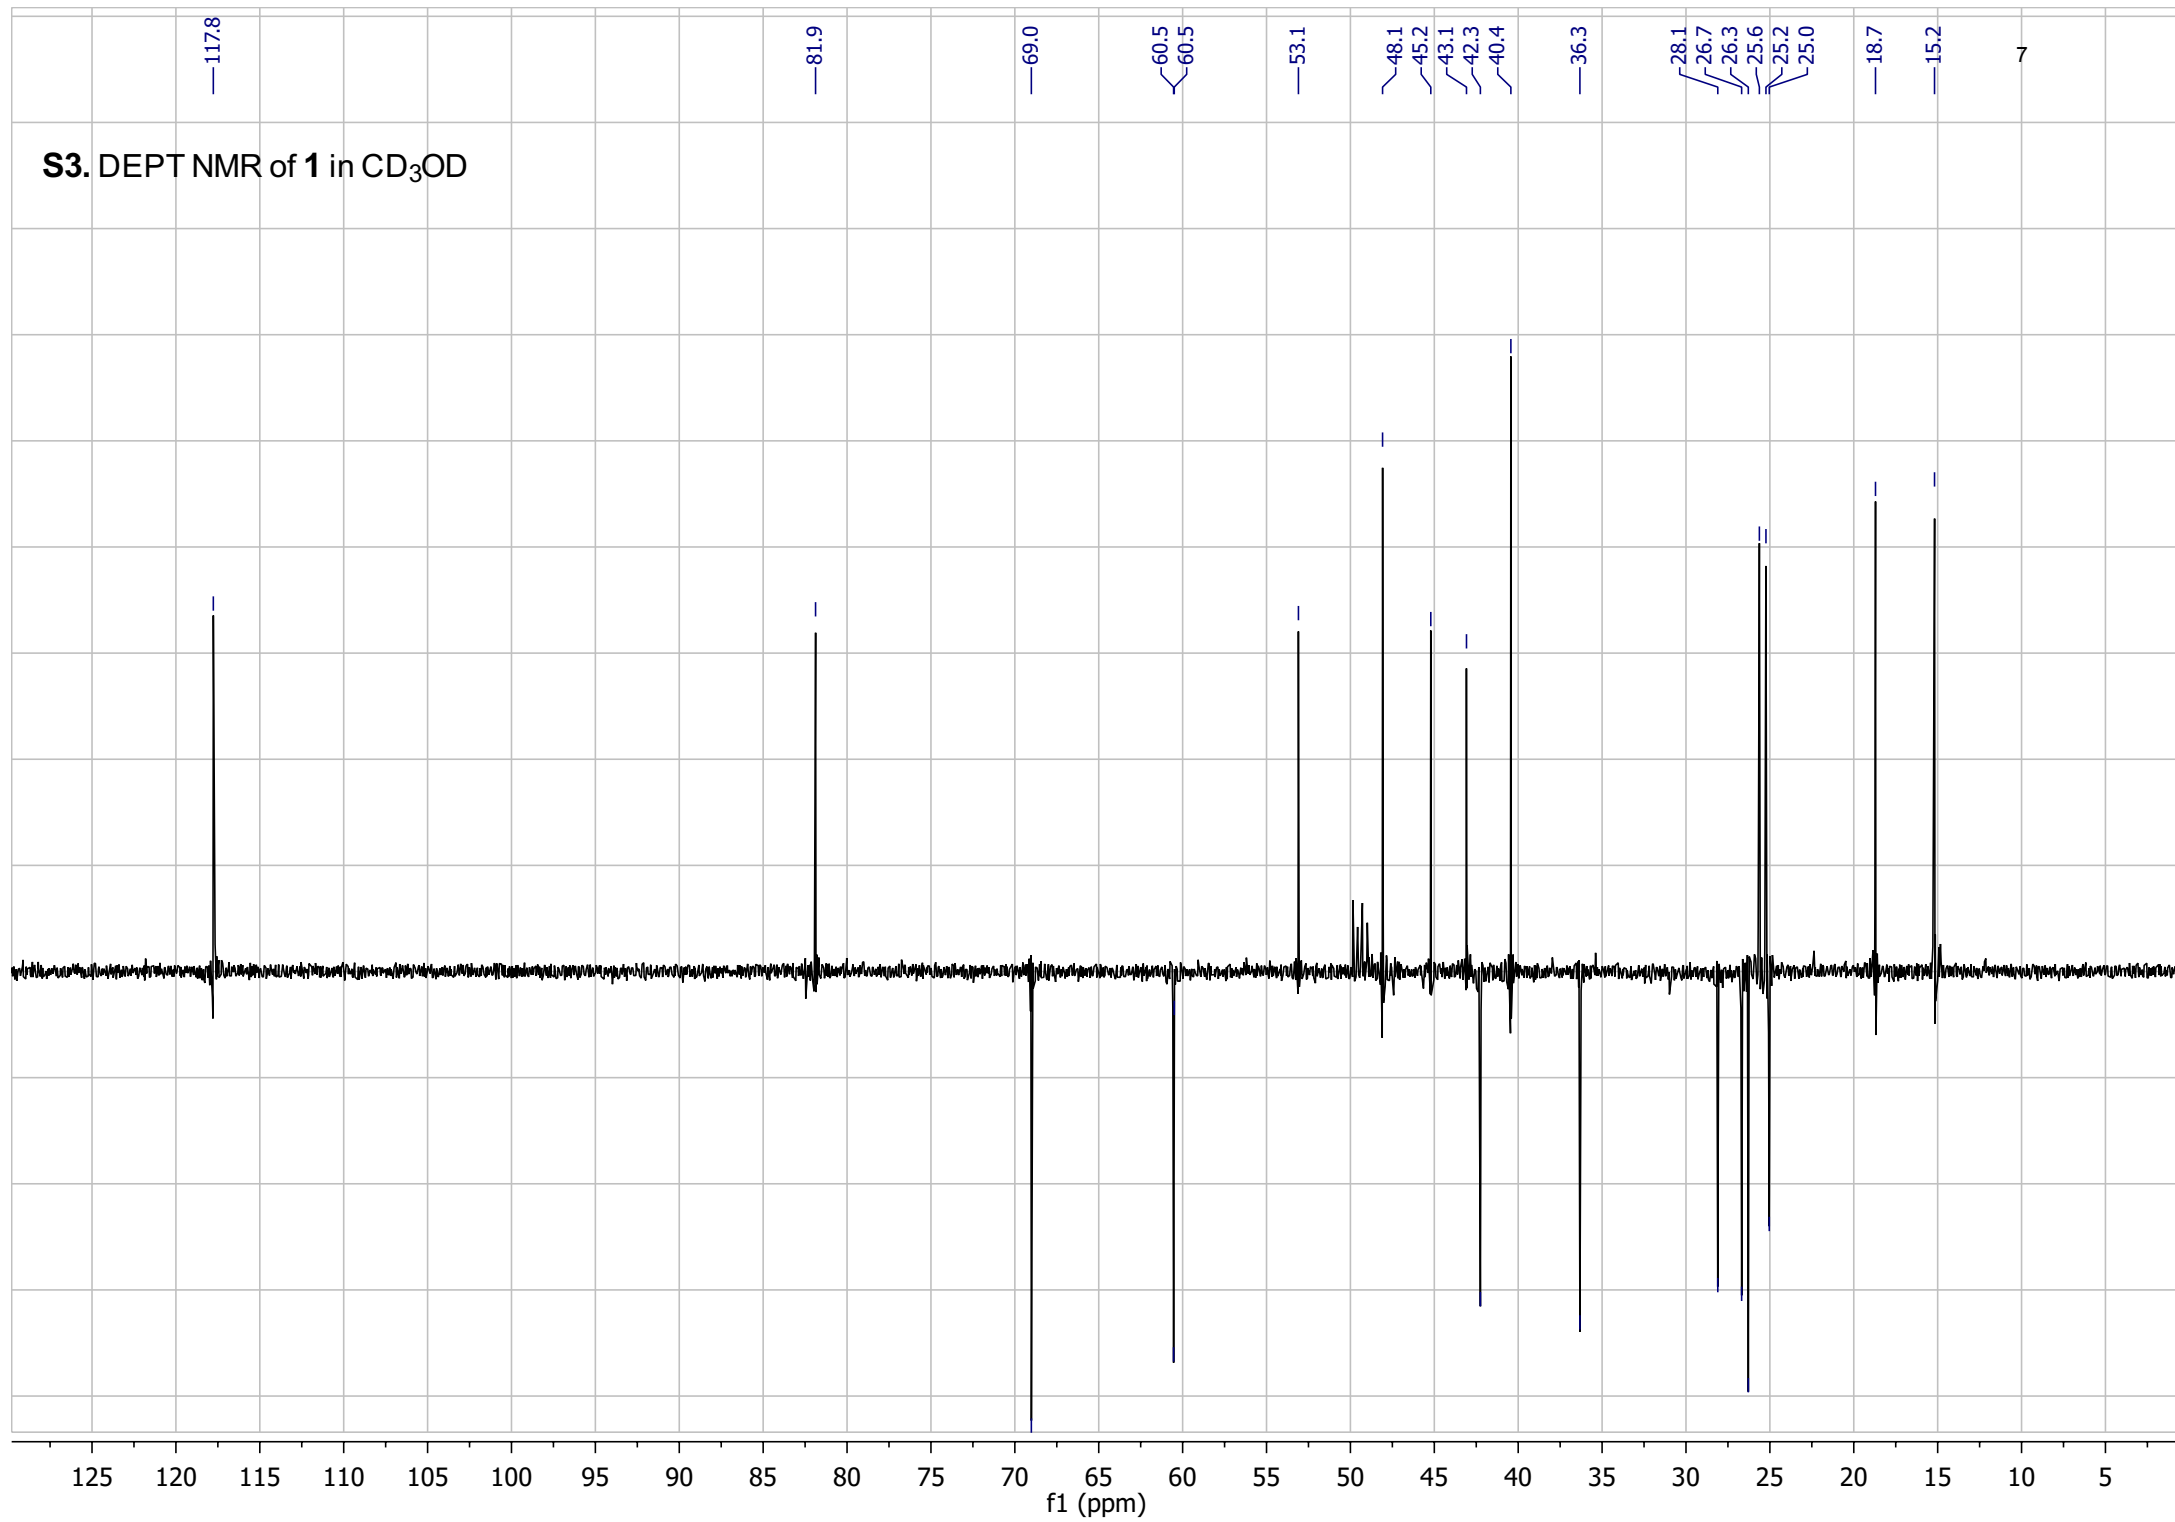

S4. COSY NMR of 1 in CD<sub>3</sub>OD

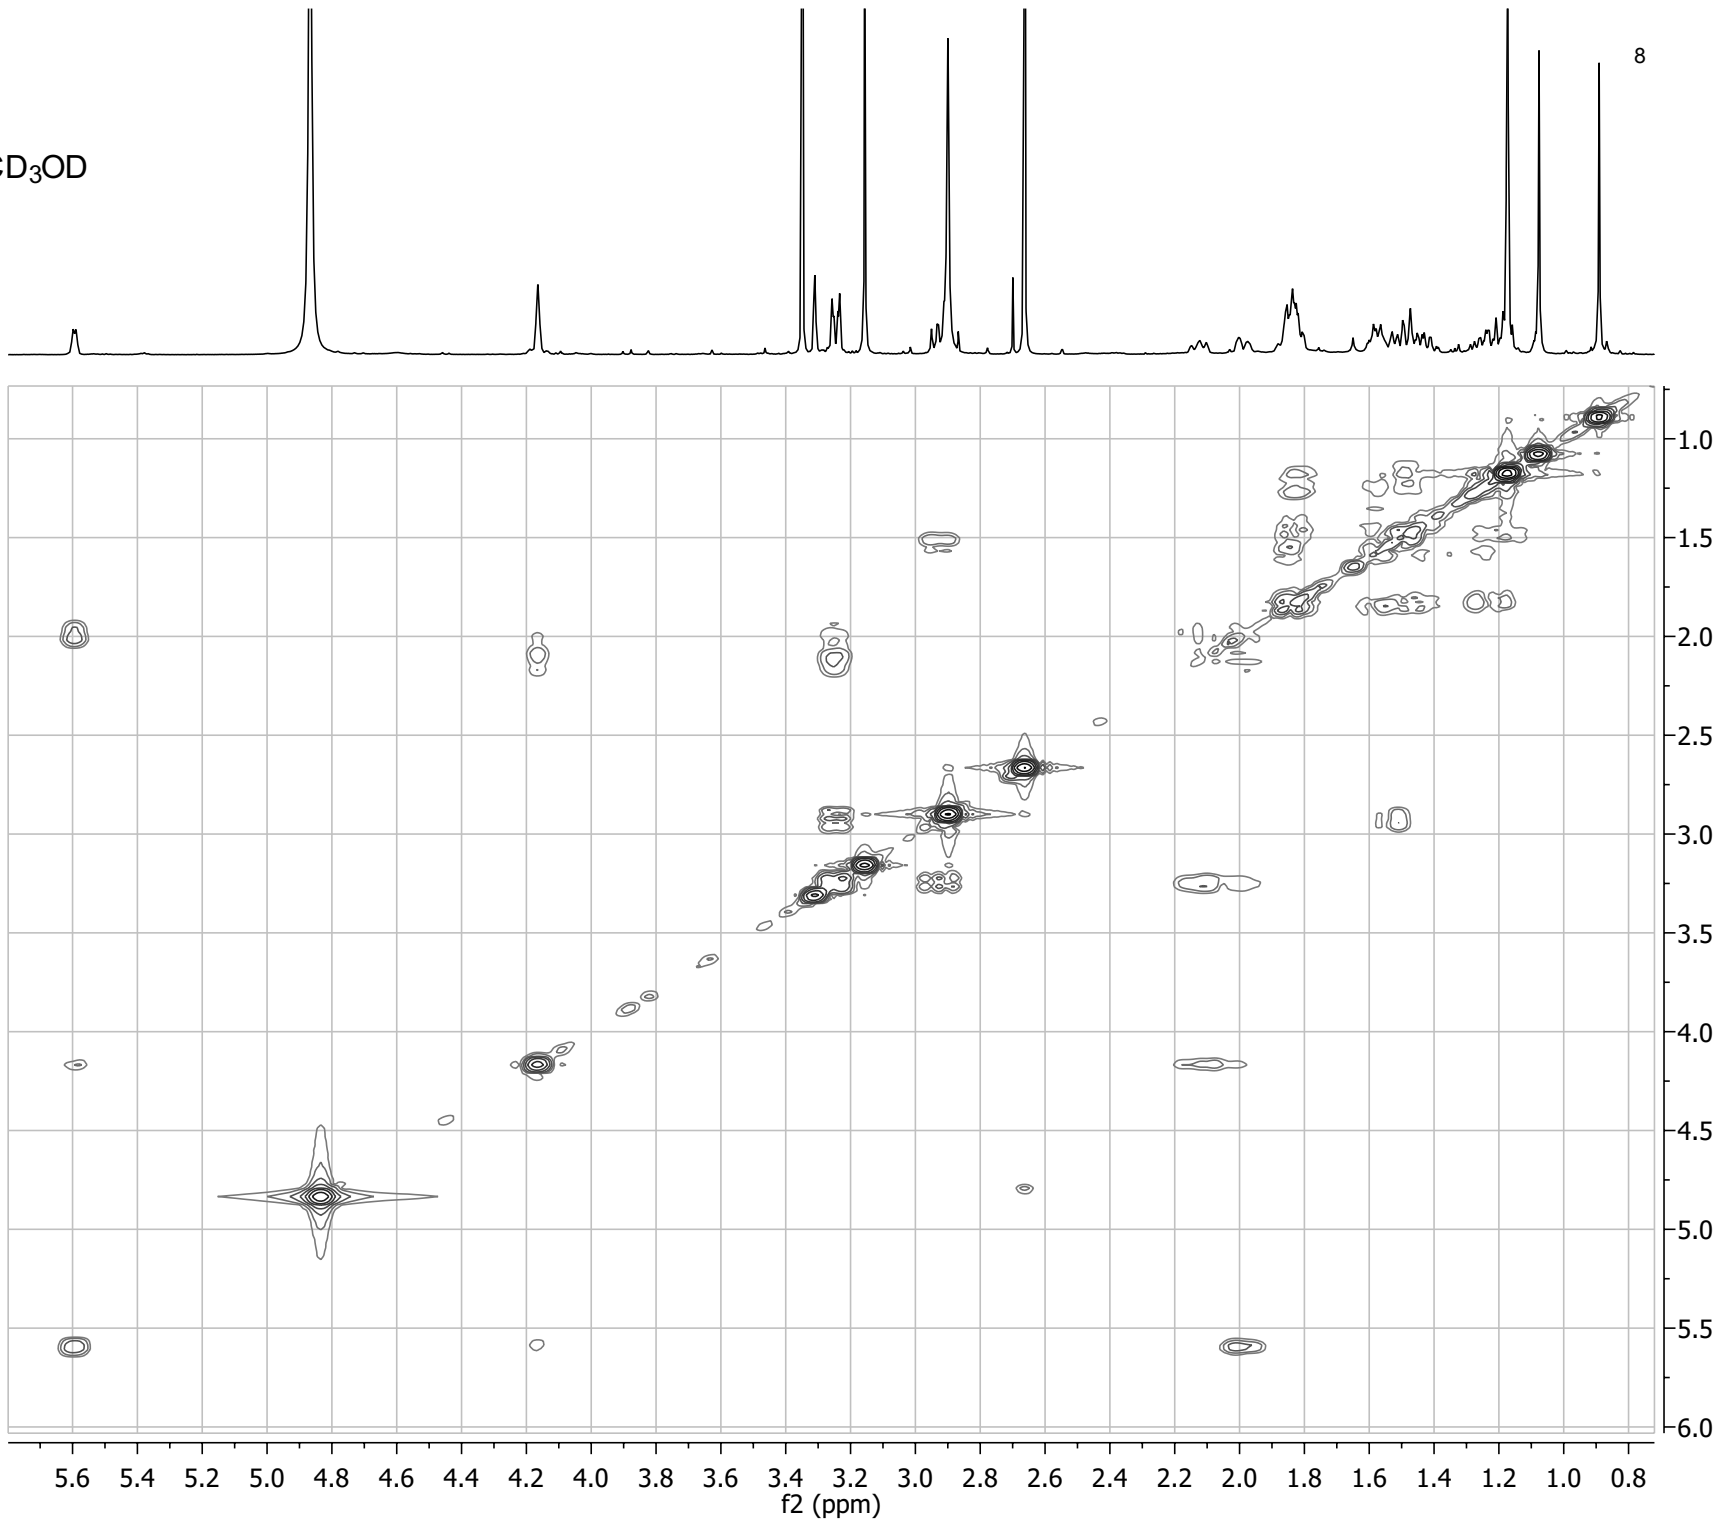



S5. HSQC NMR of **1** in CD<sub>3</sub>OD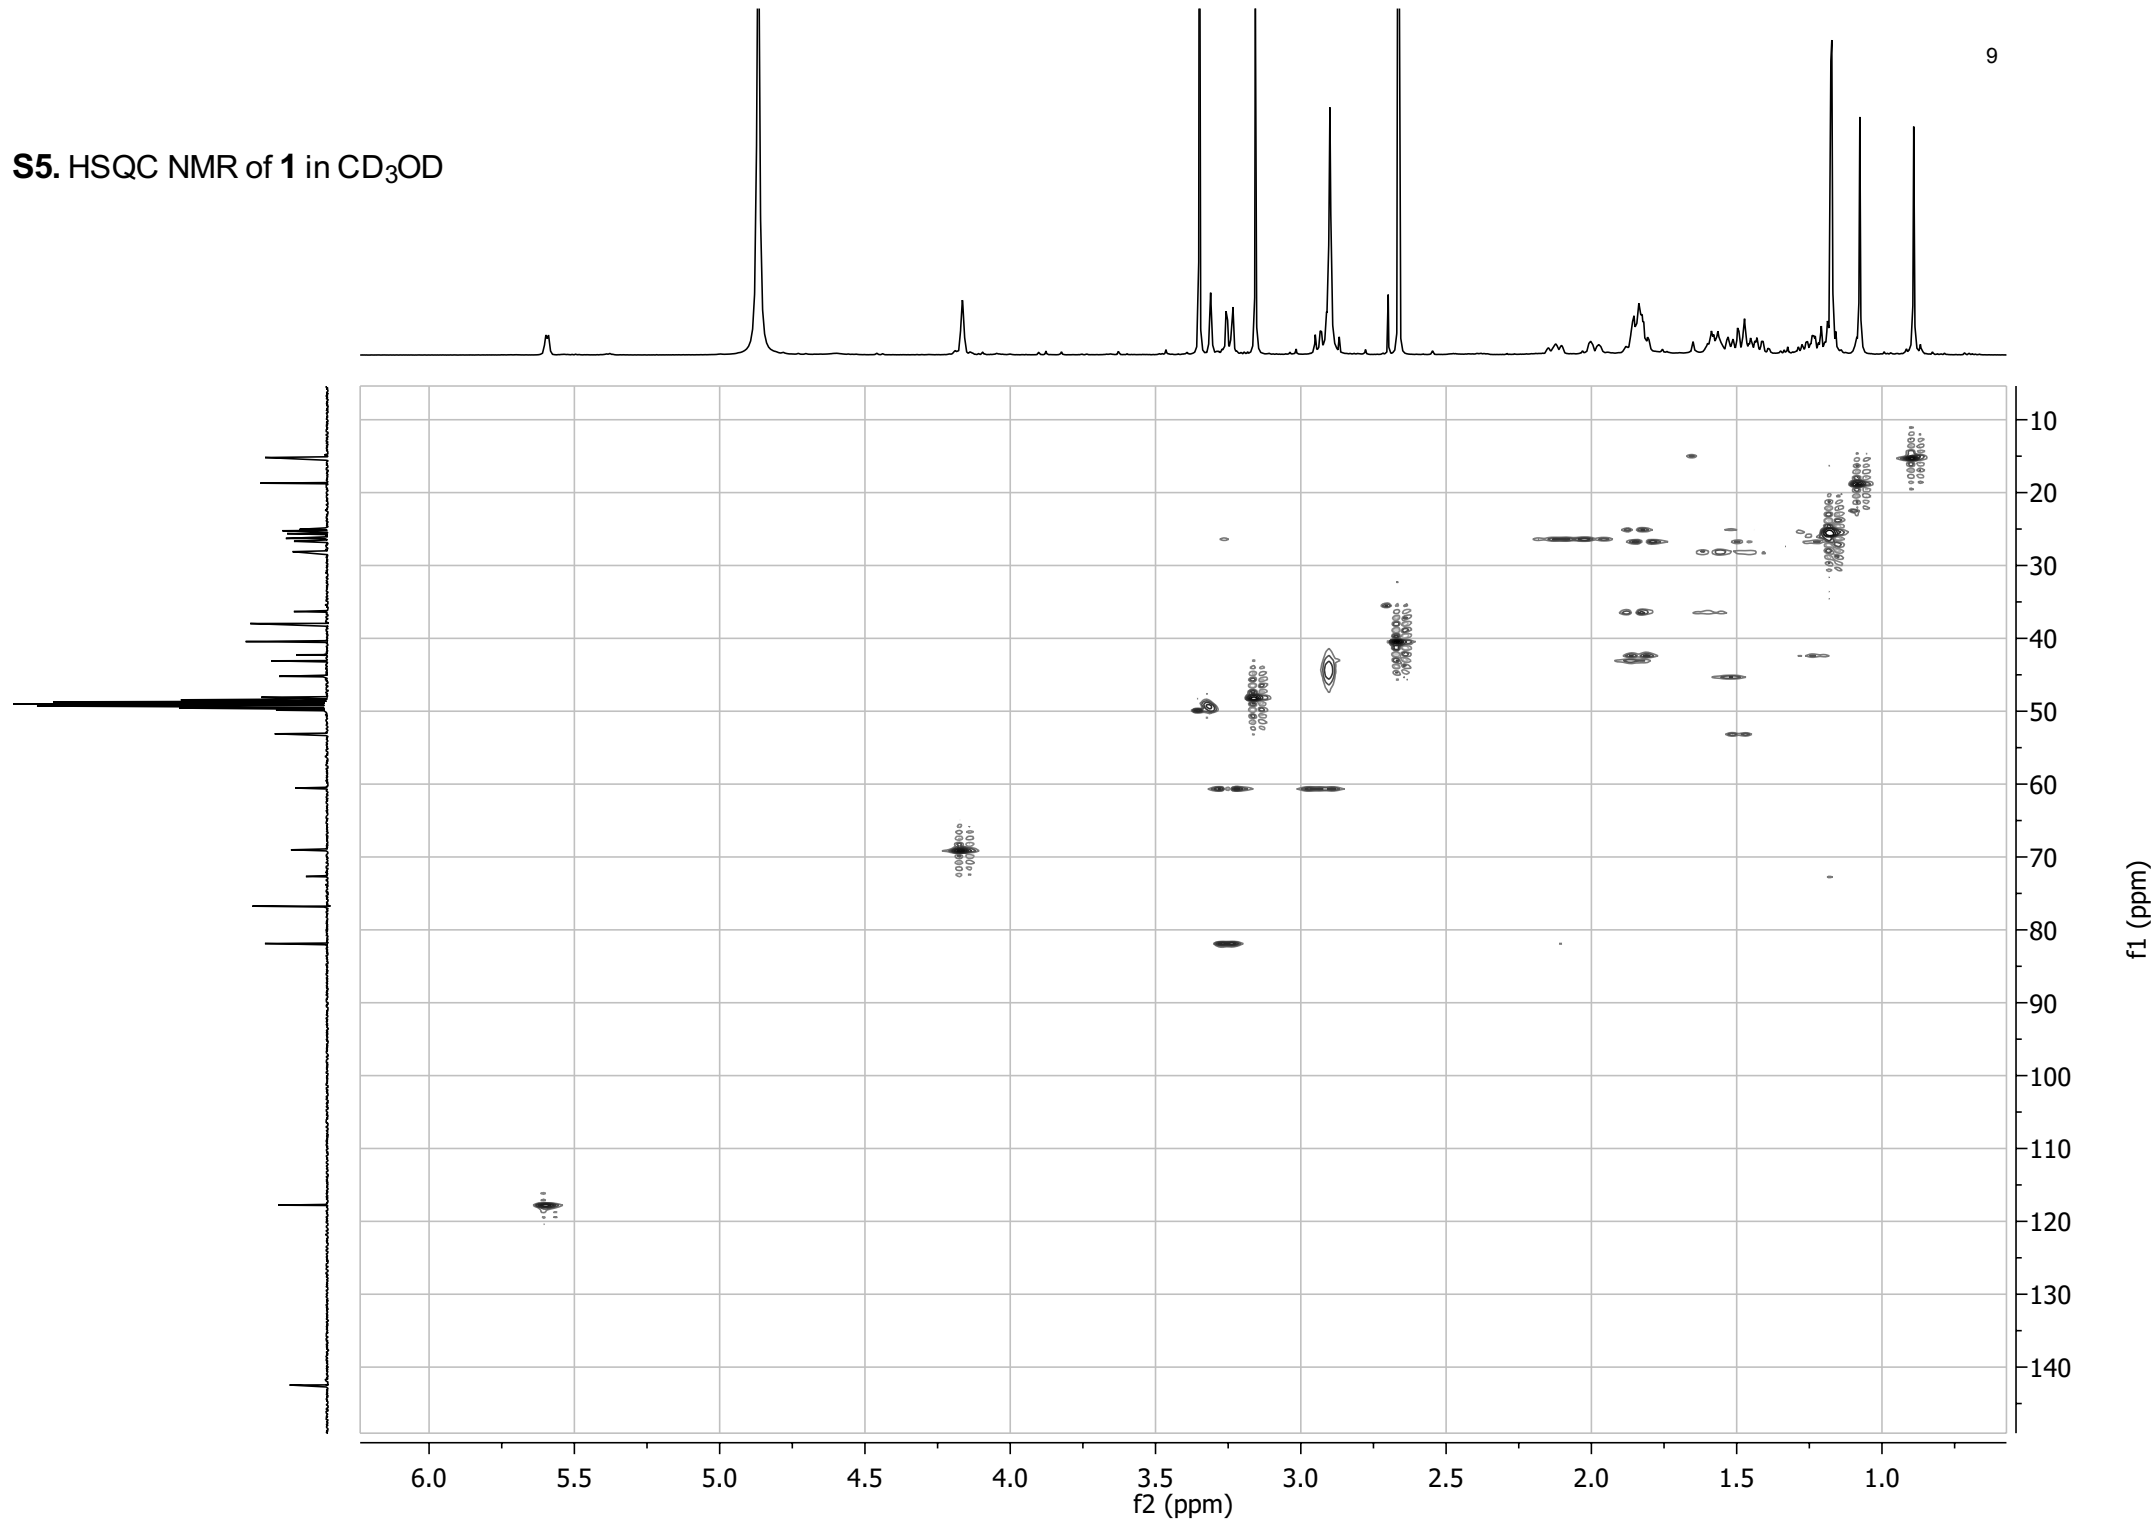

S6. HMBC NMR of 1 in CD<sub>3</sub>OD

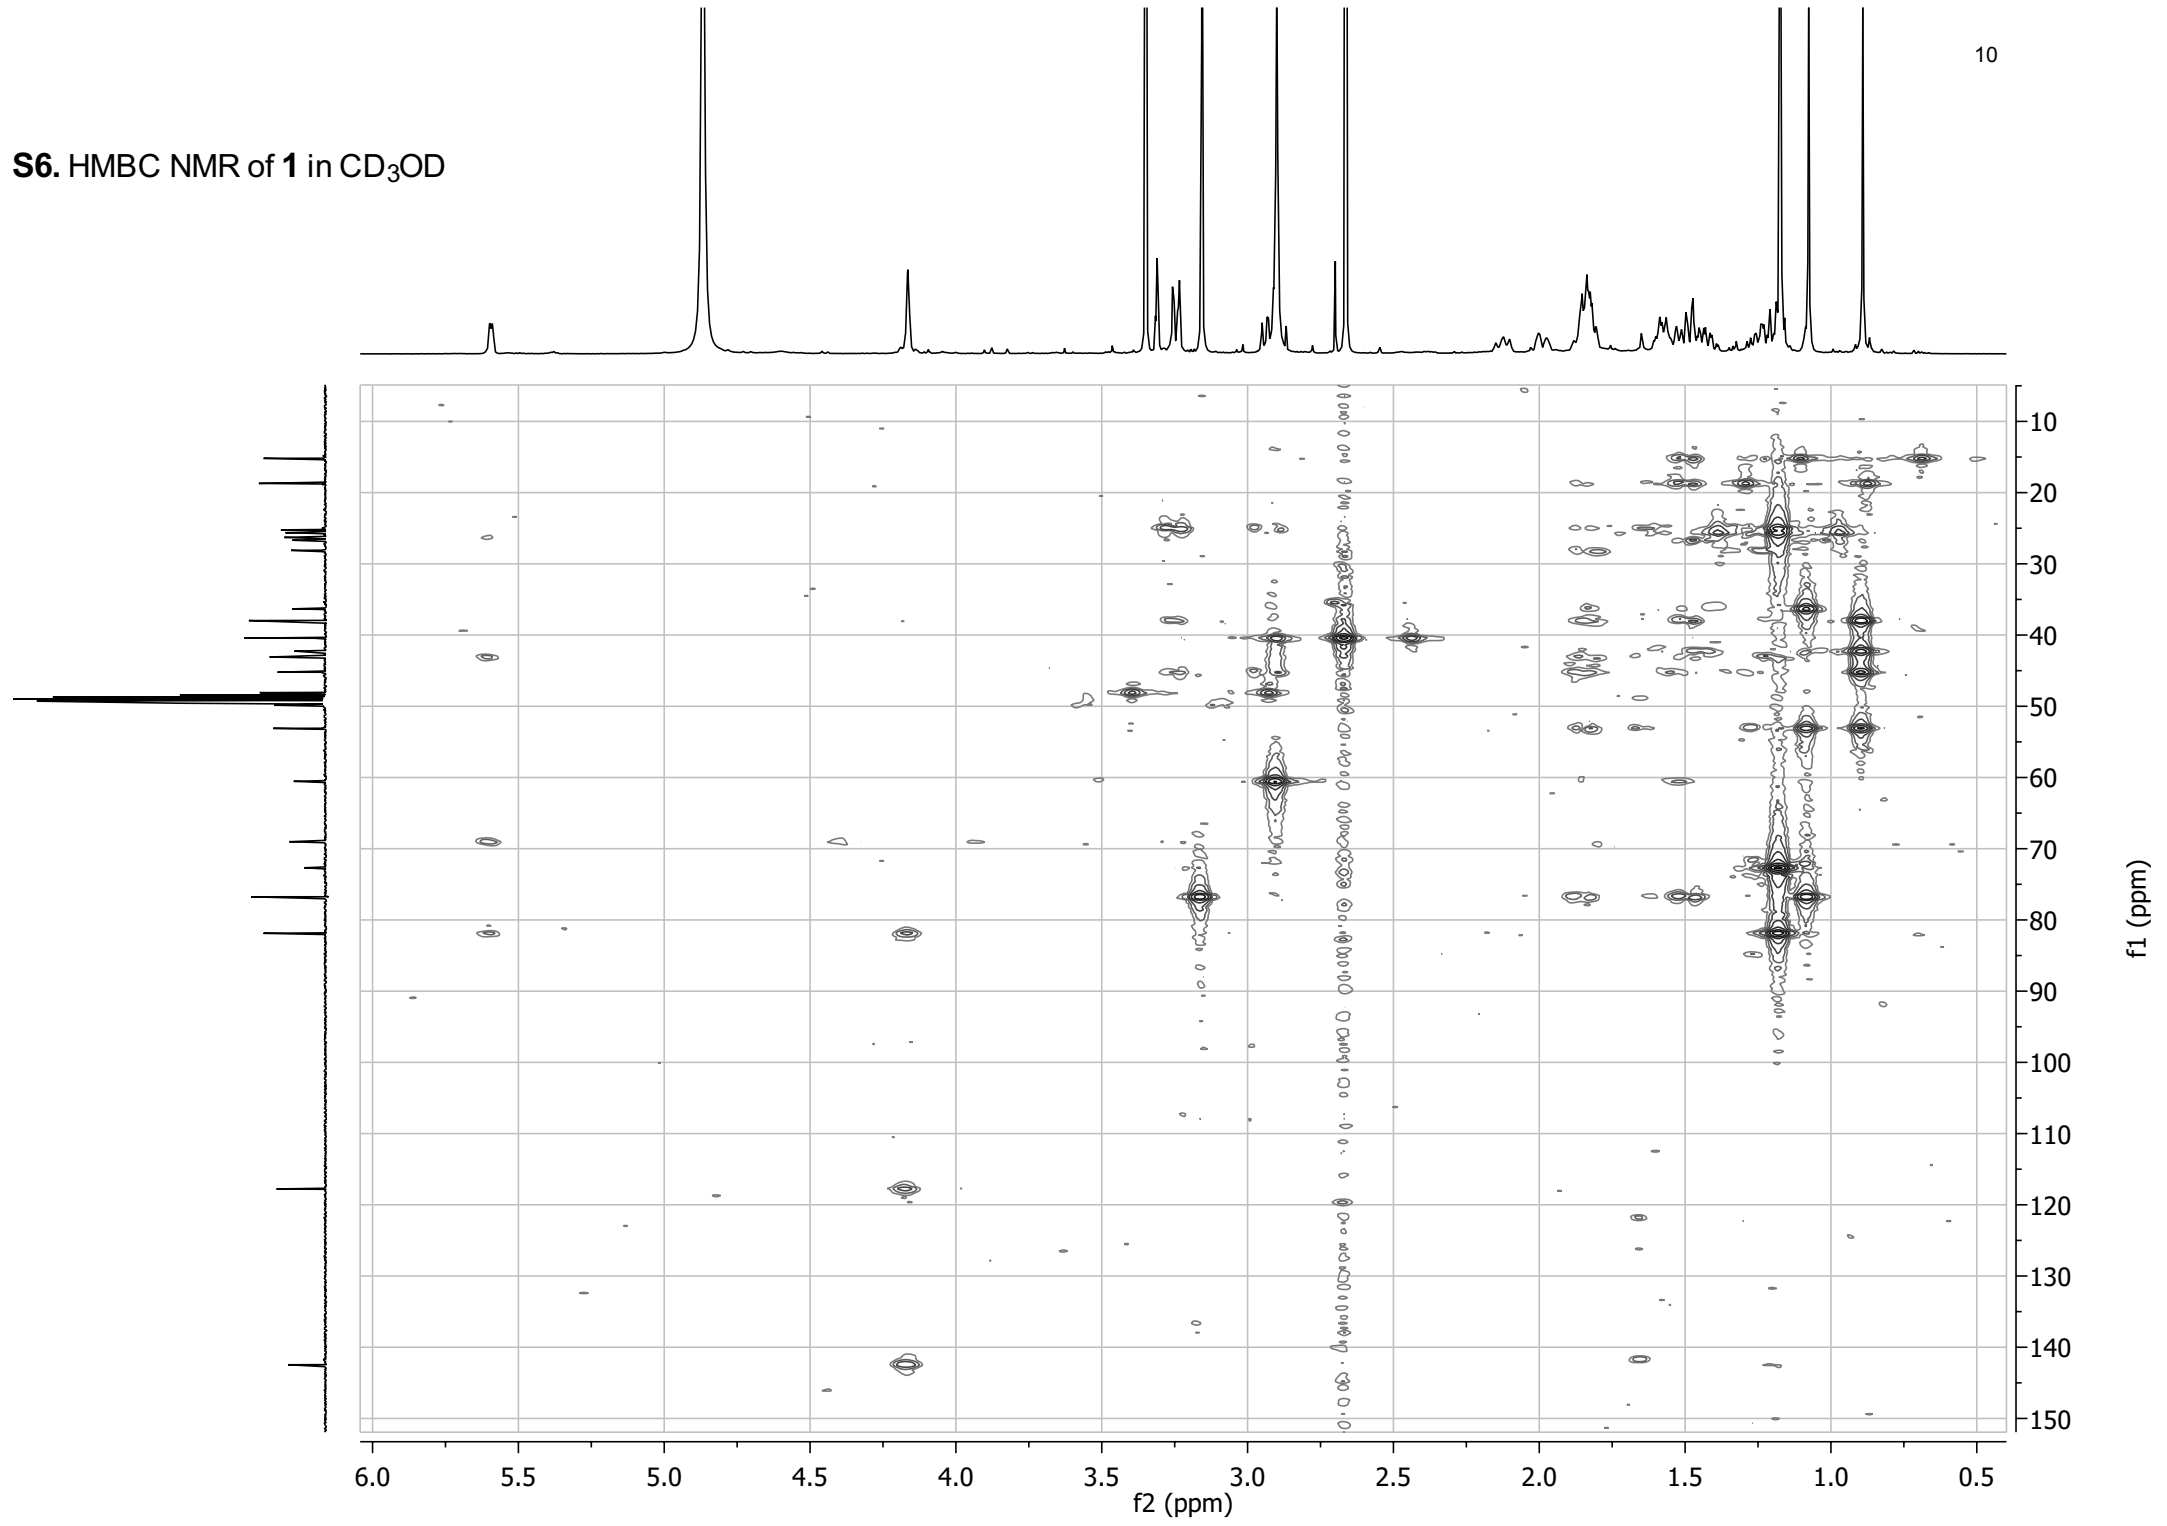

**S7.** Selective NOESY NMR of H-12 (4.16 ppm) in **1** in CD<sub>3</sub>OD

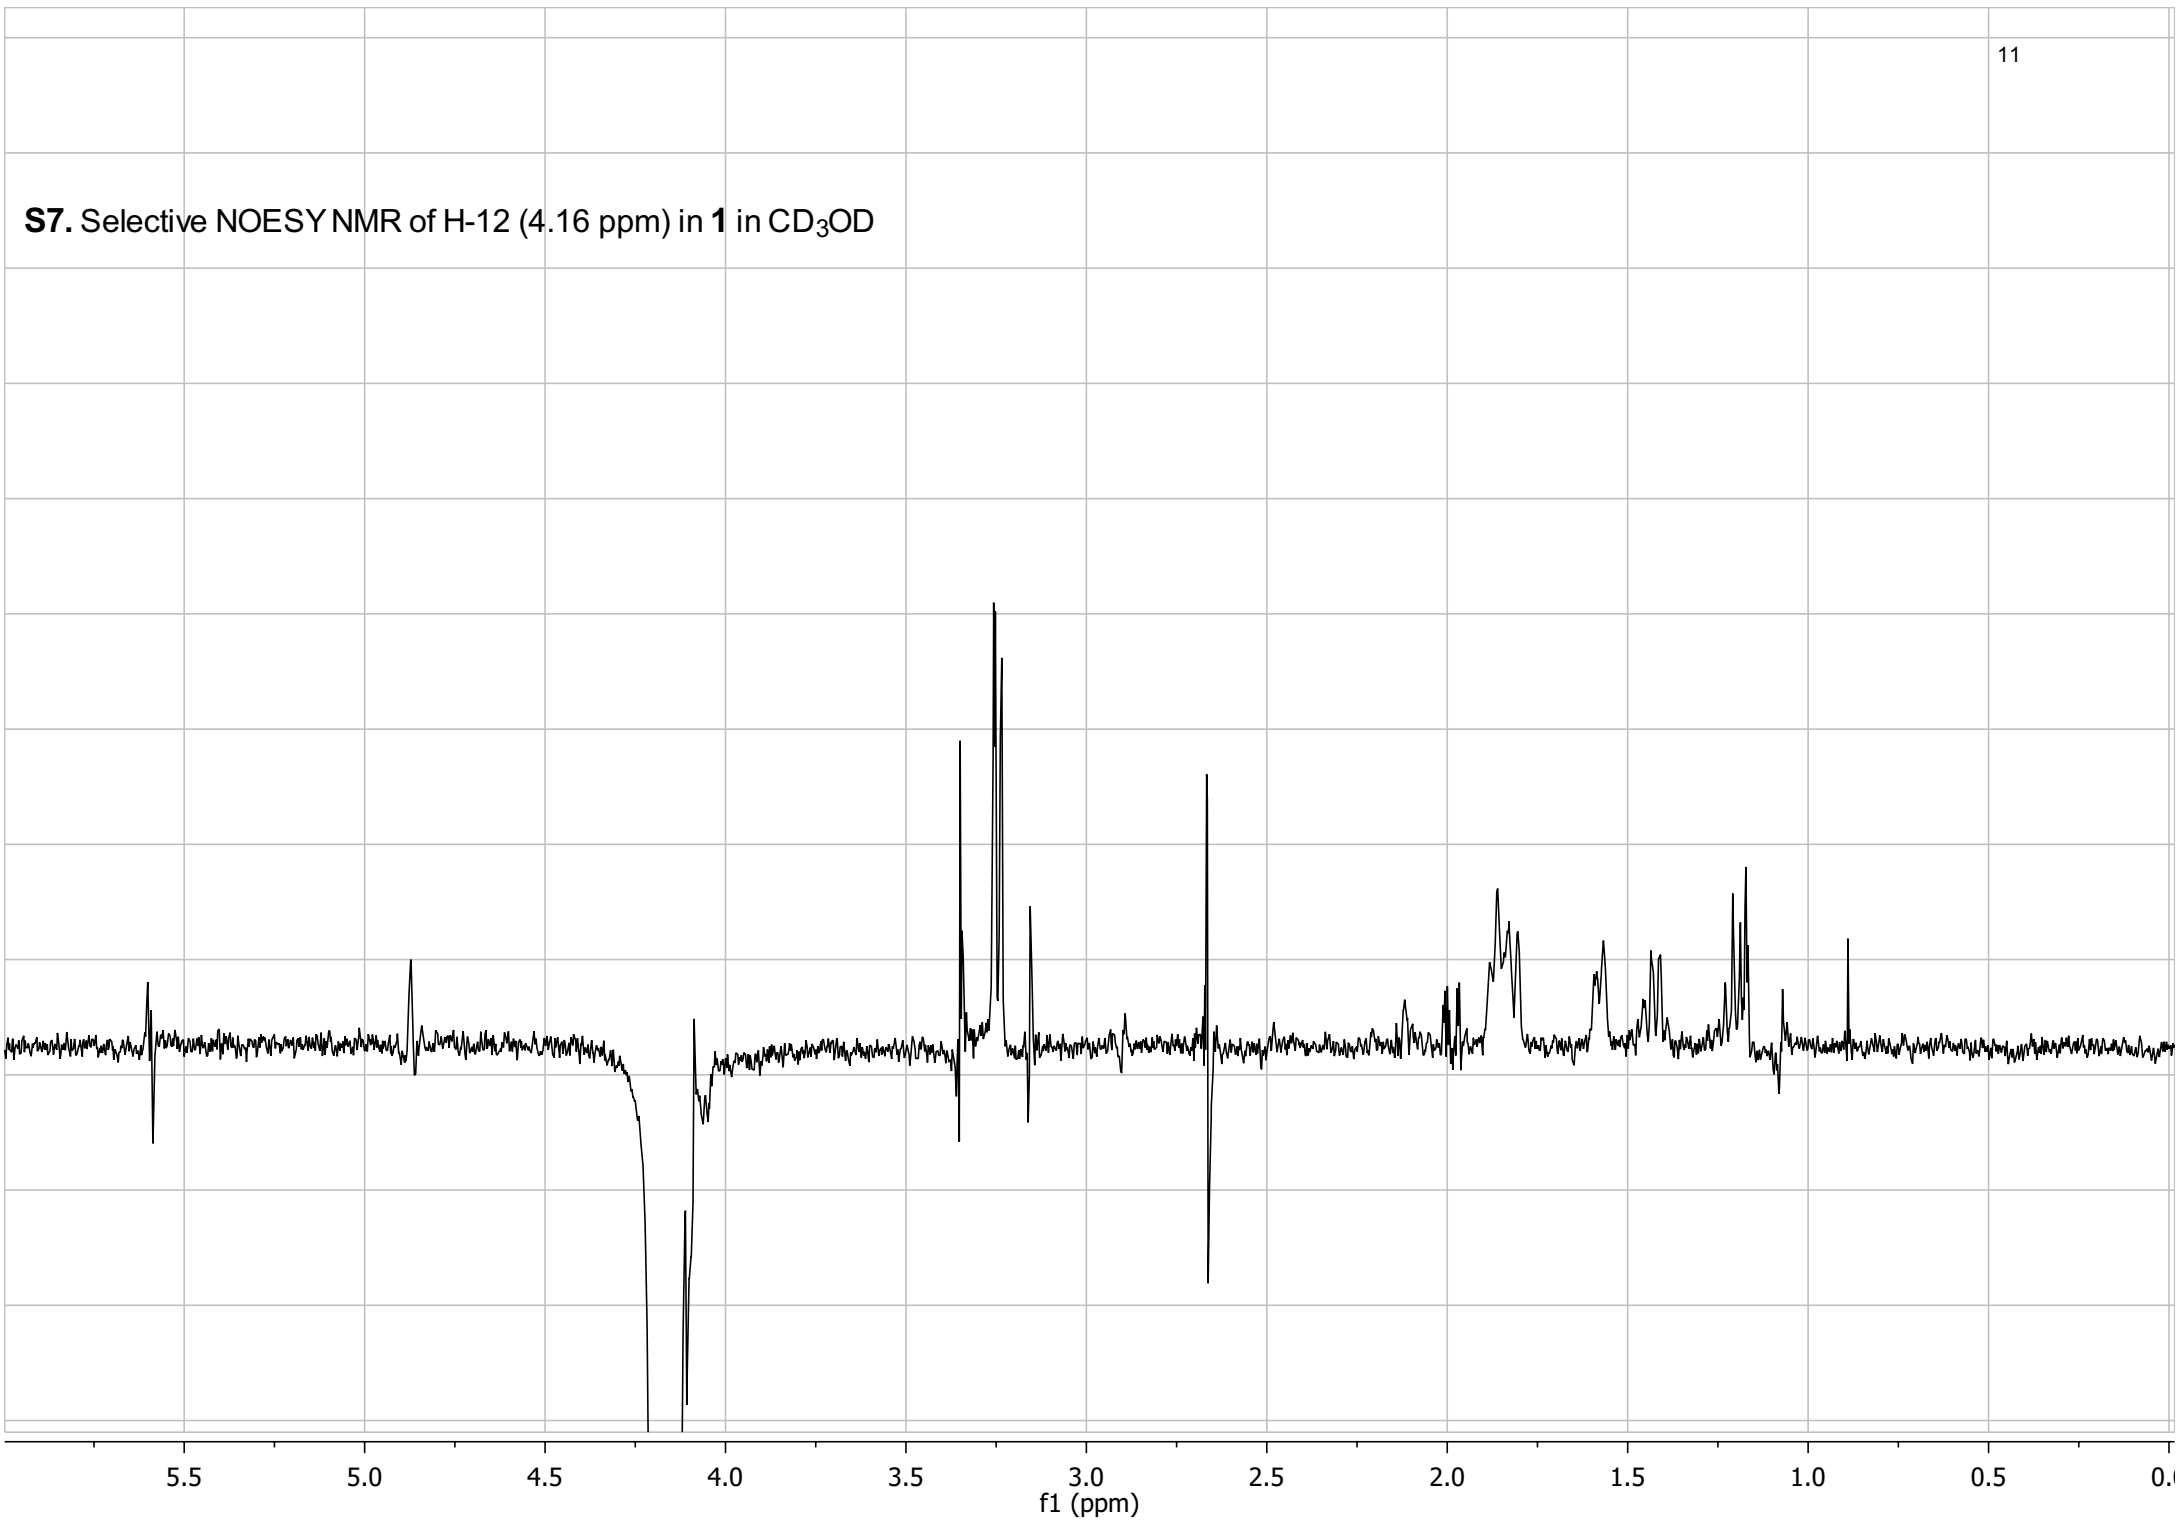

**S8.** Selective NOESY NMR of H-15/H-22 (3.25 ppm) in **1** in CD<sub>3</sub>OD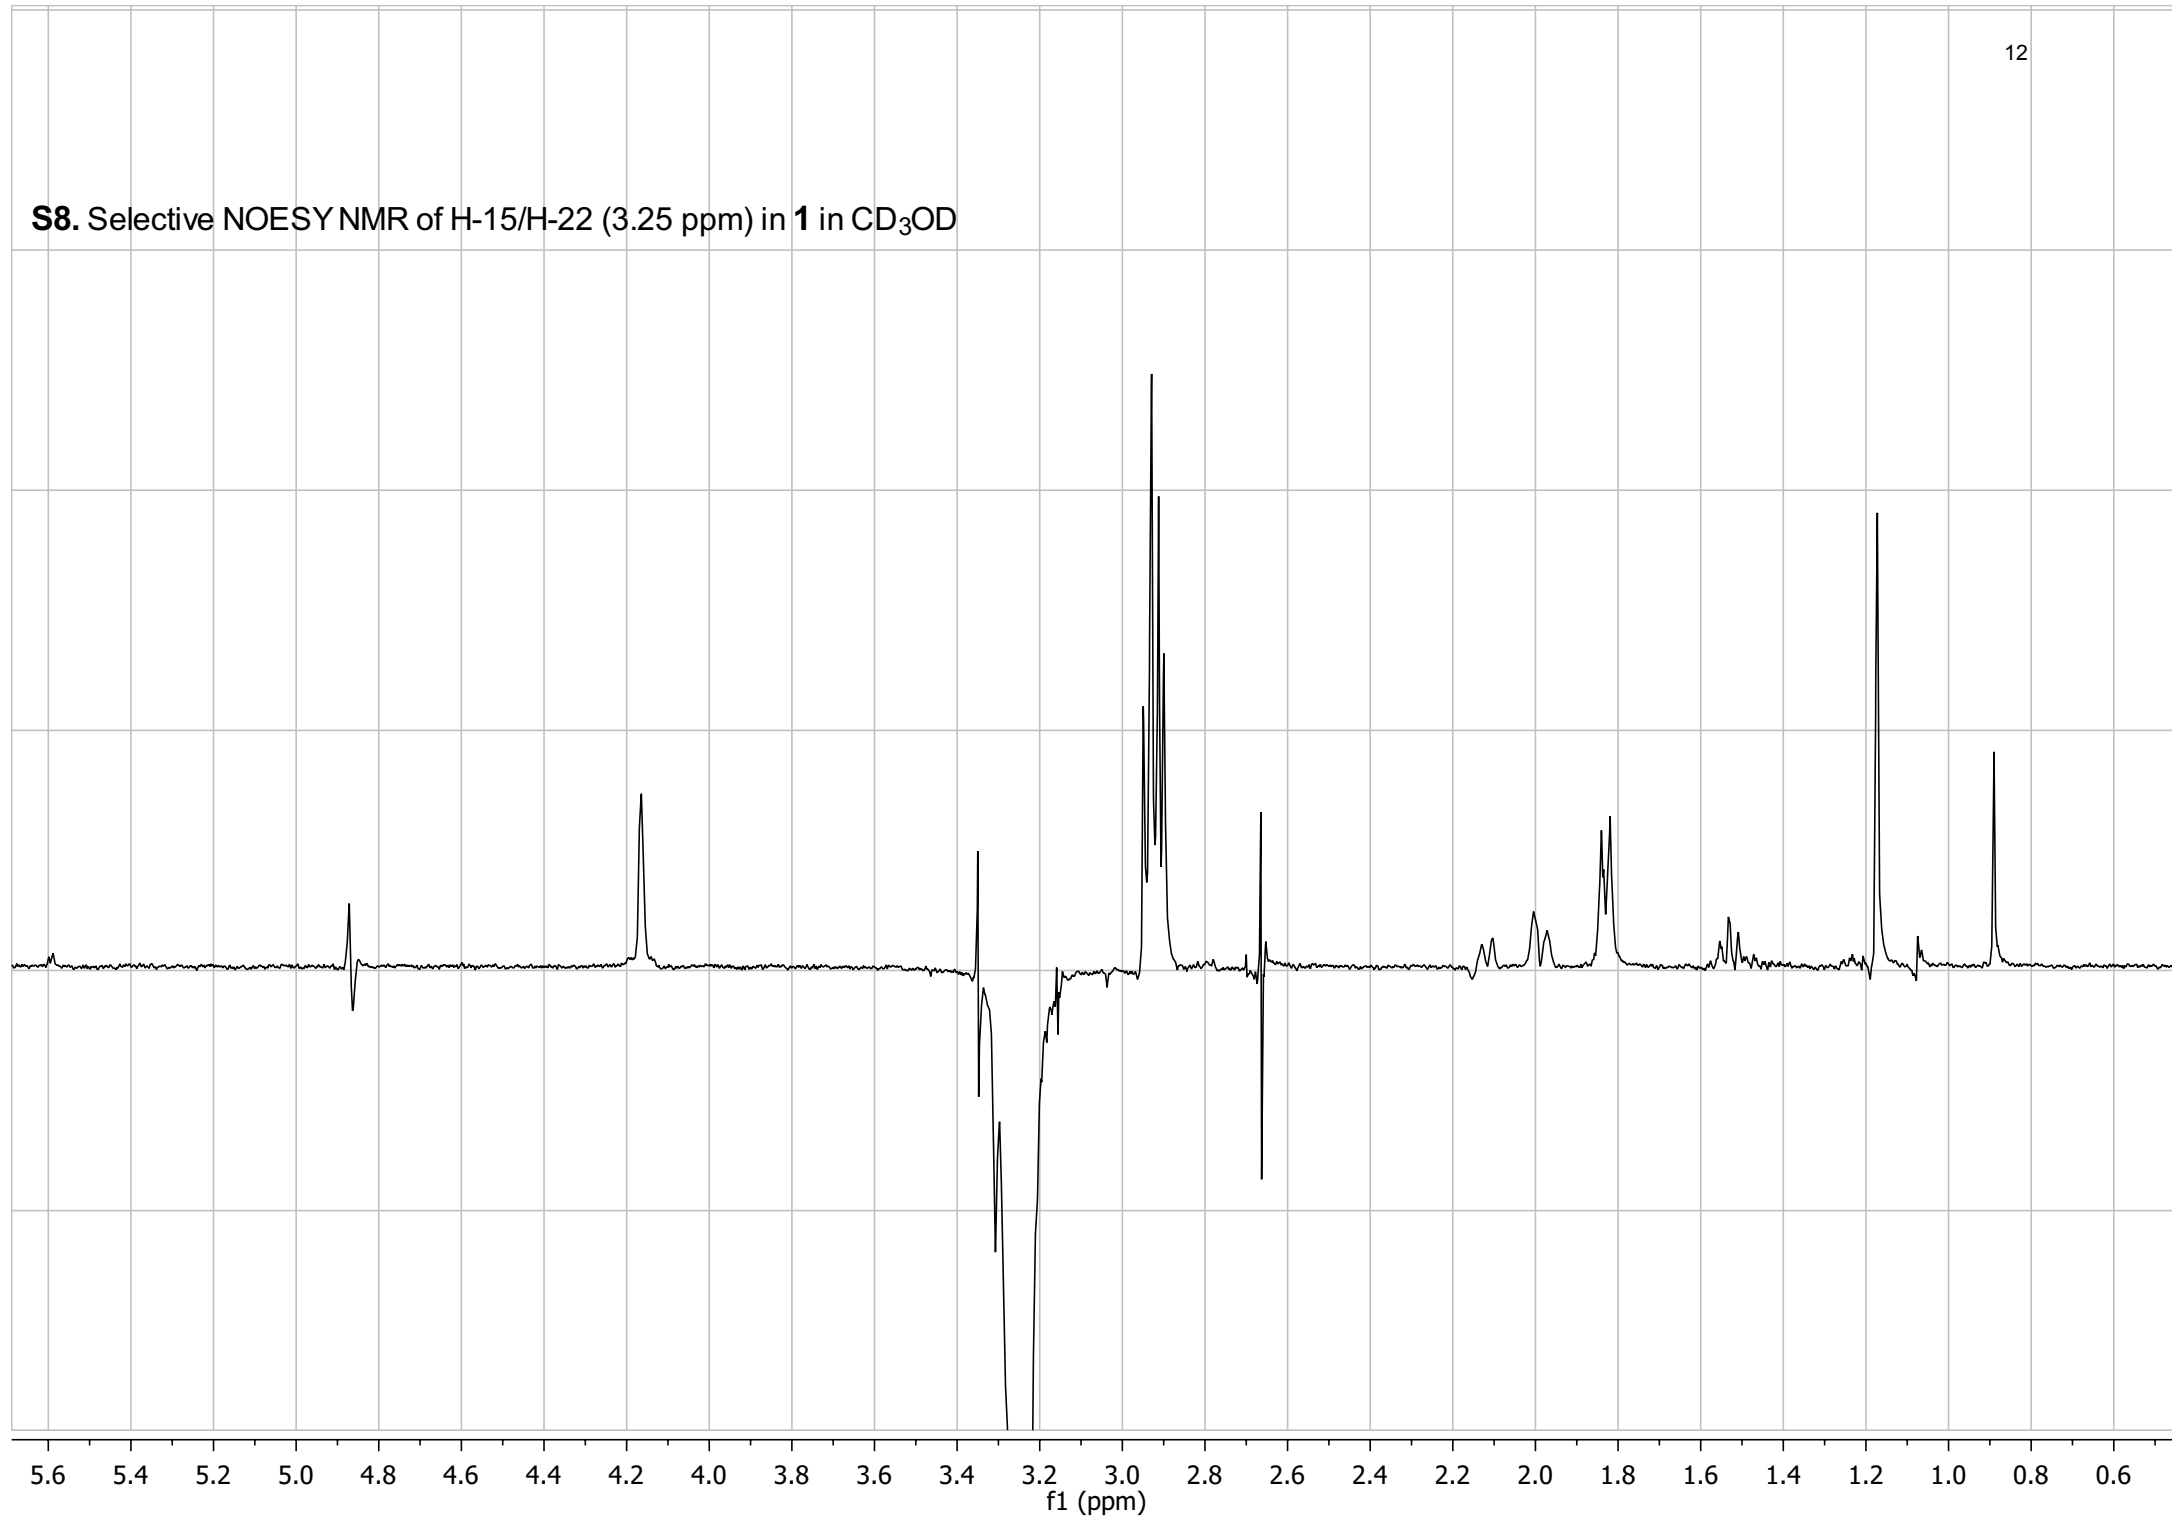

**S9.** Selective NOESY NMR of H-21 (3.16 ppm) in **1** in CD<sub>3</sub>OD

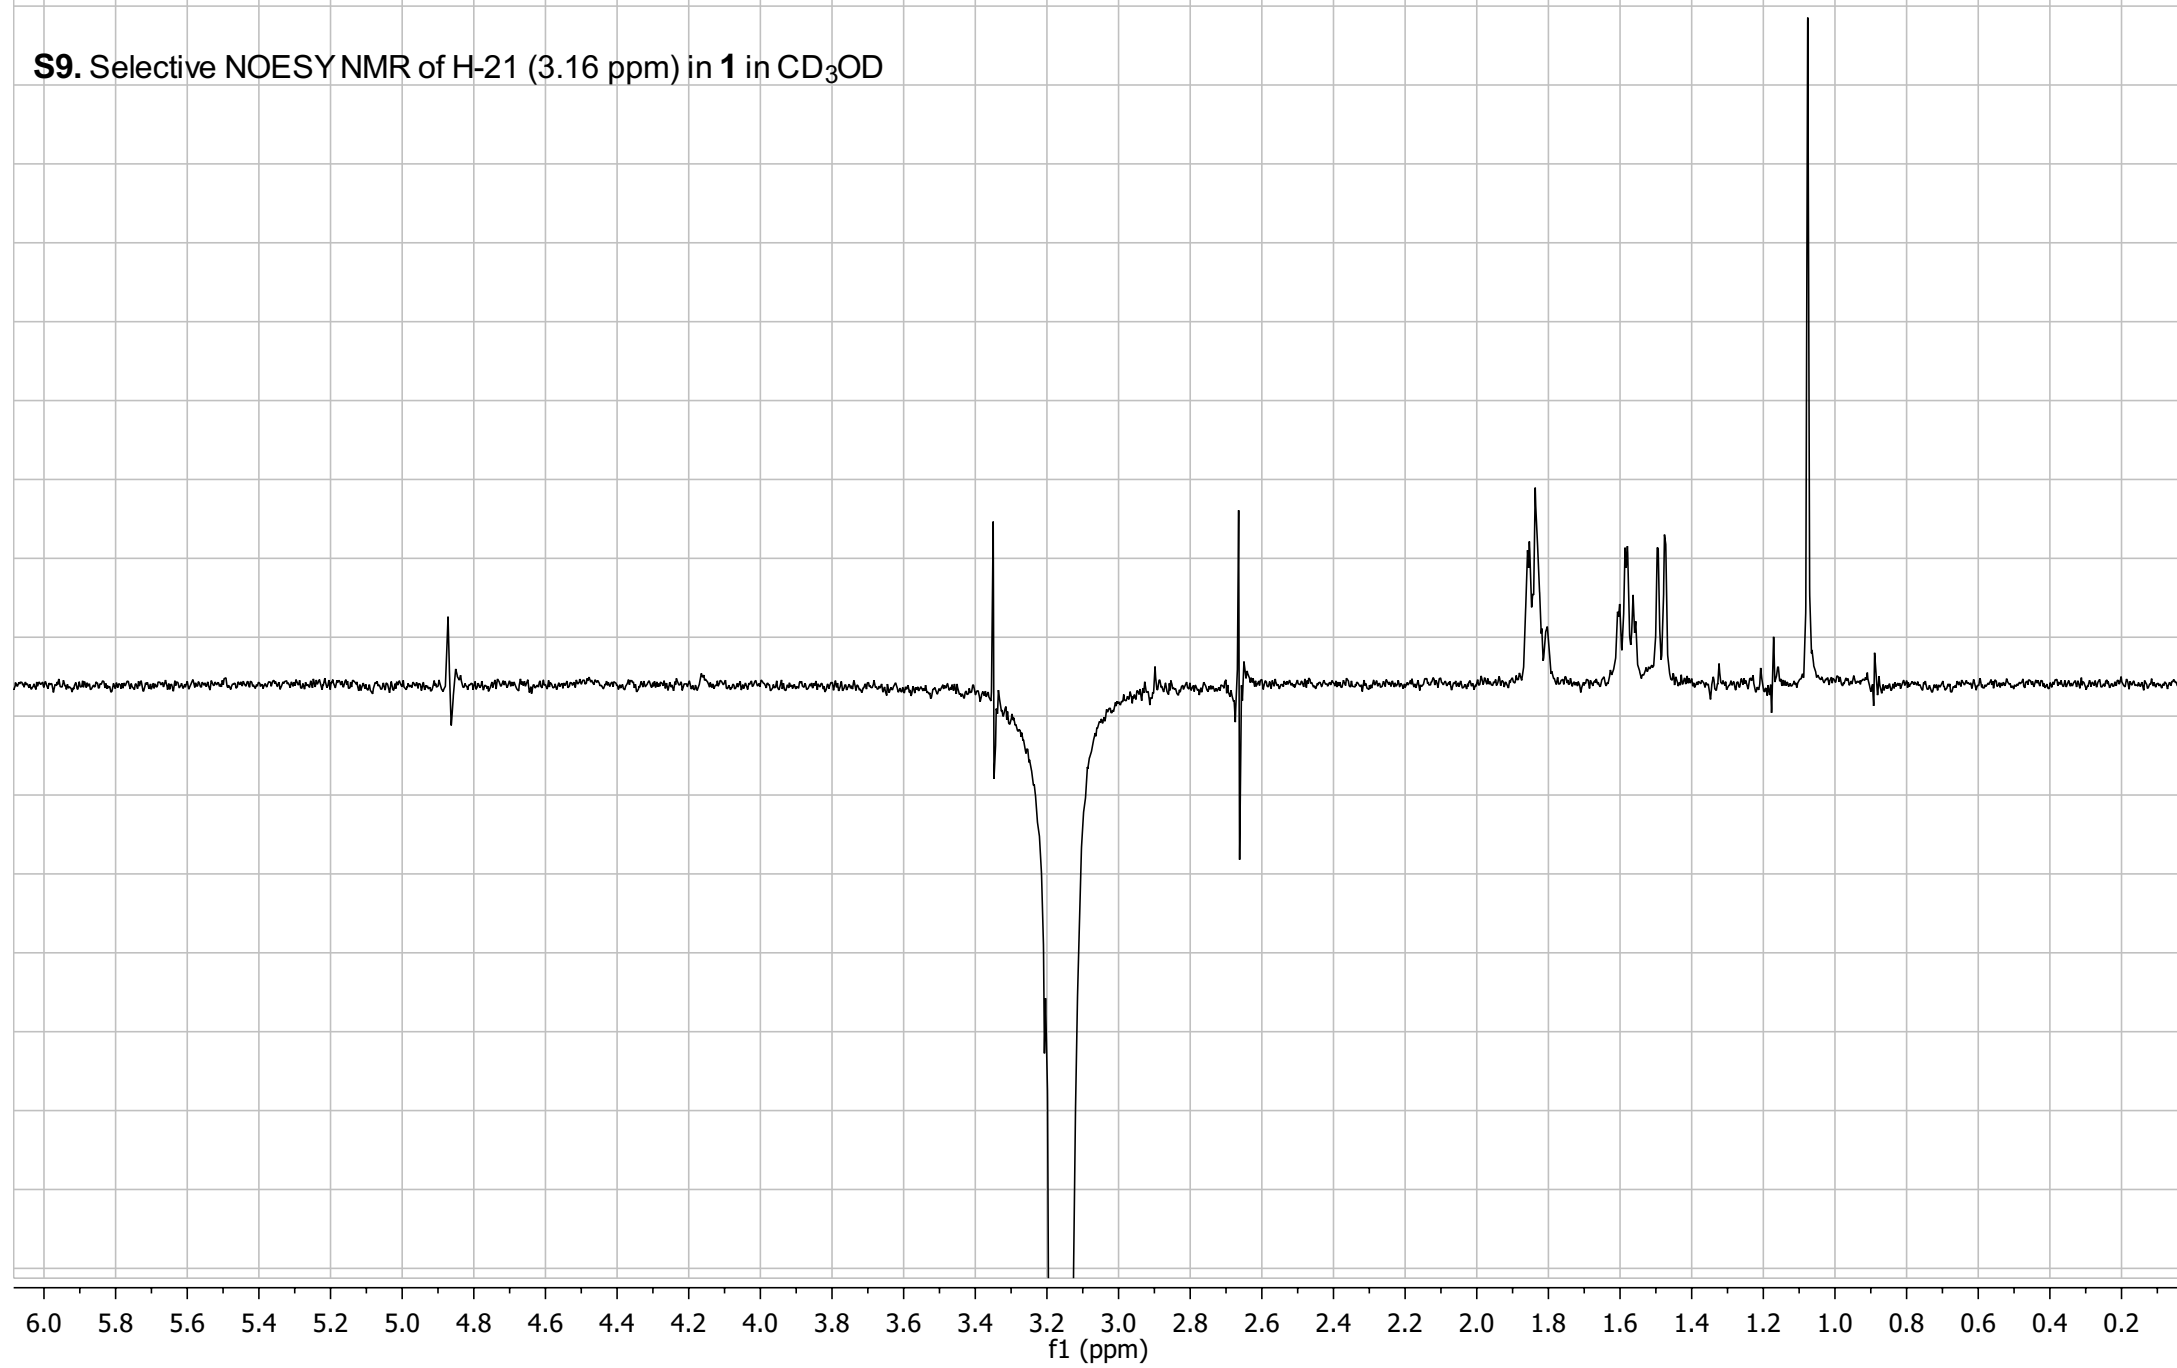

**S10.** Selective NOESY NMR of H-20 (1.08 ppm) in **1** in CD<sub>3</sub>OD

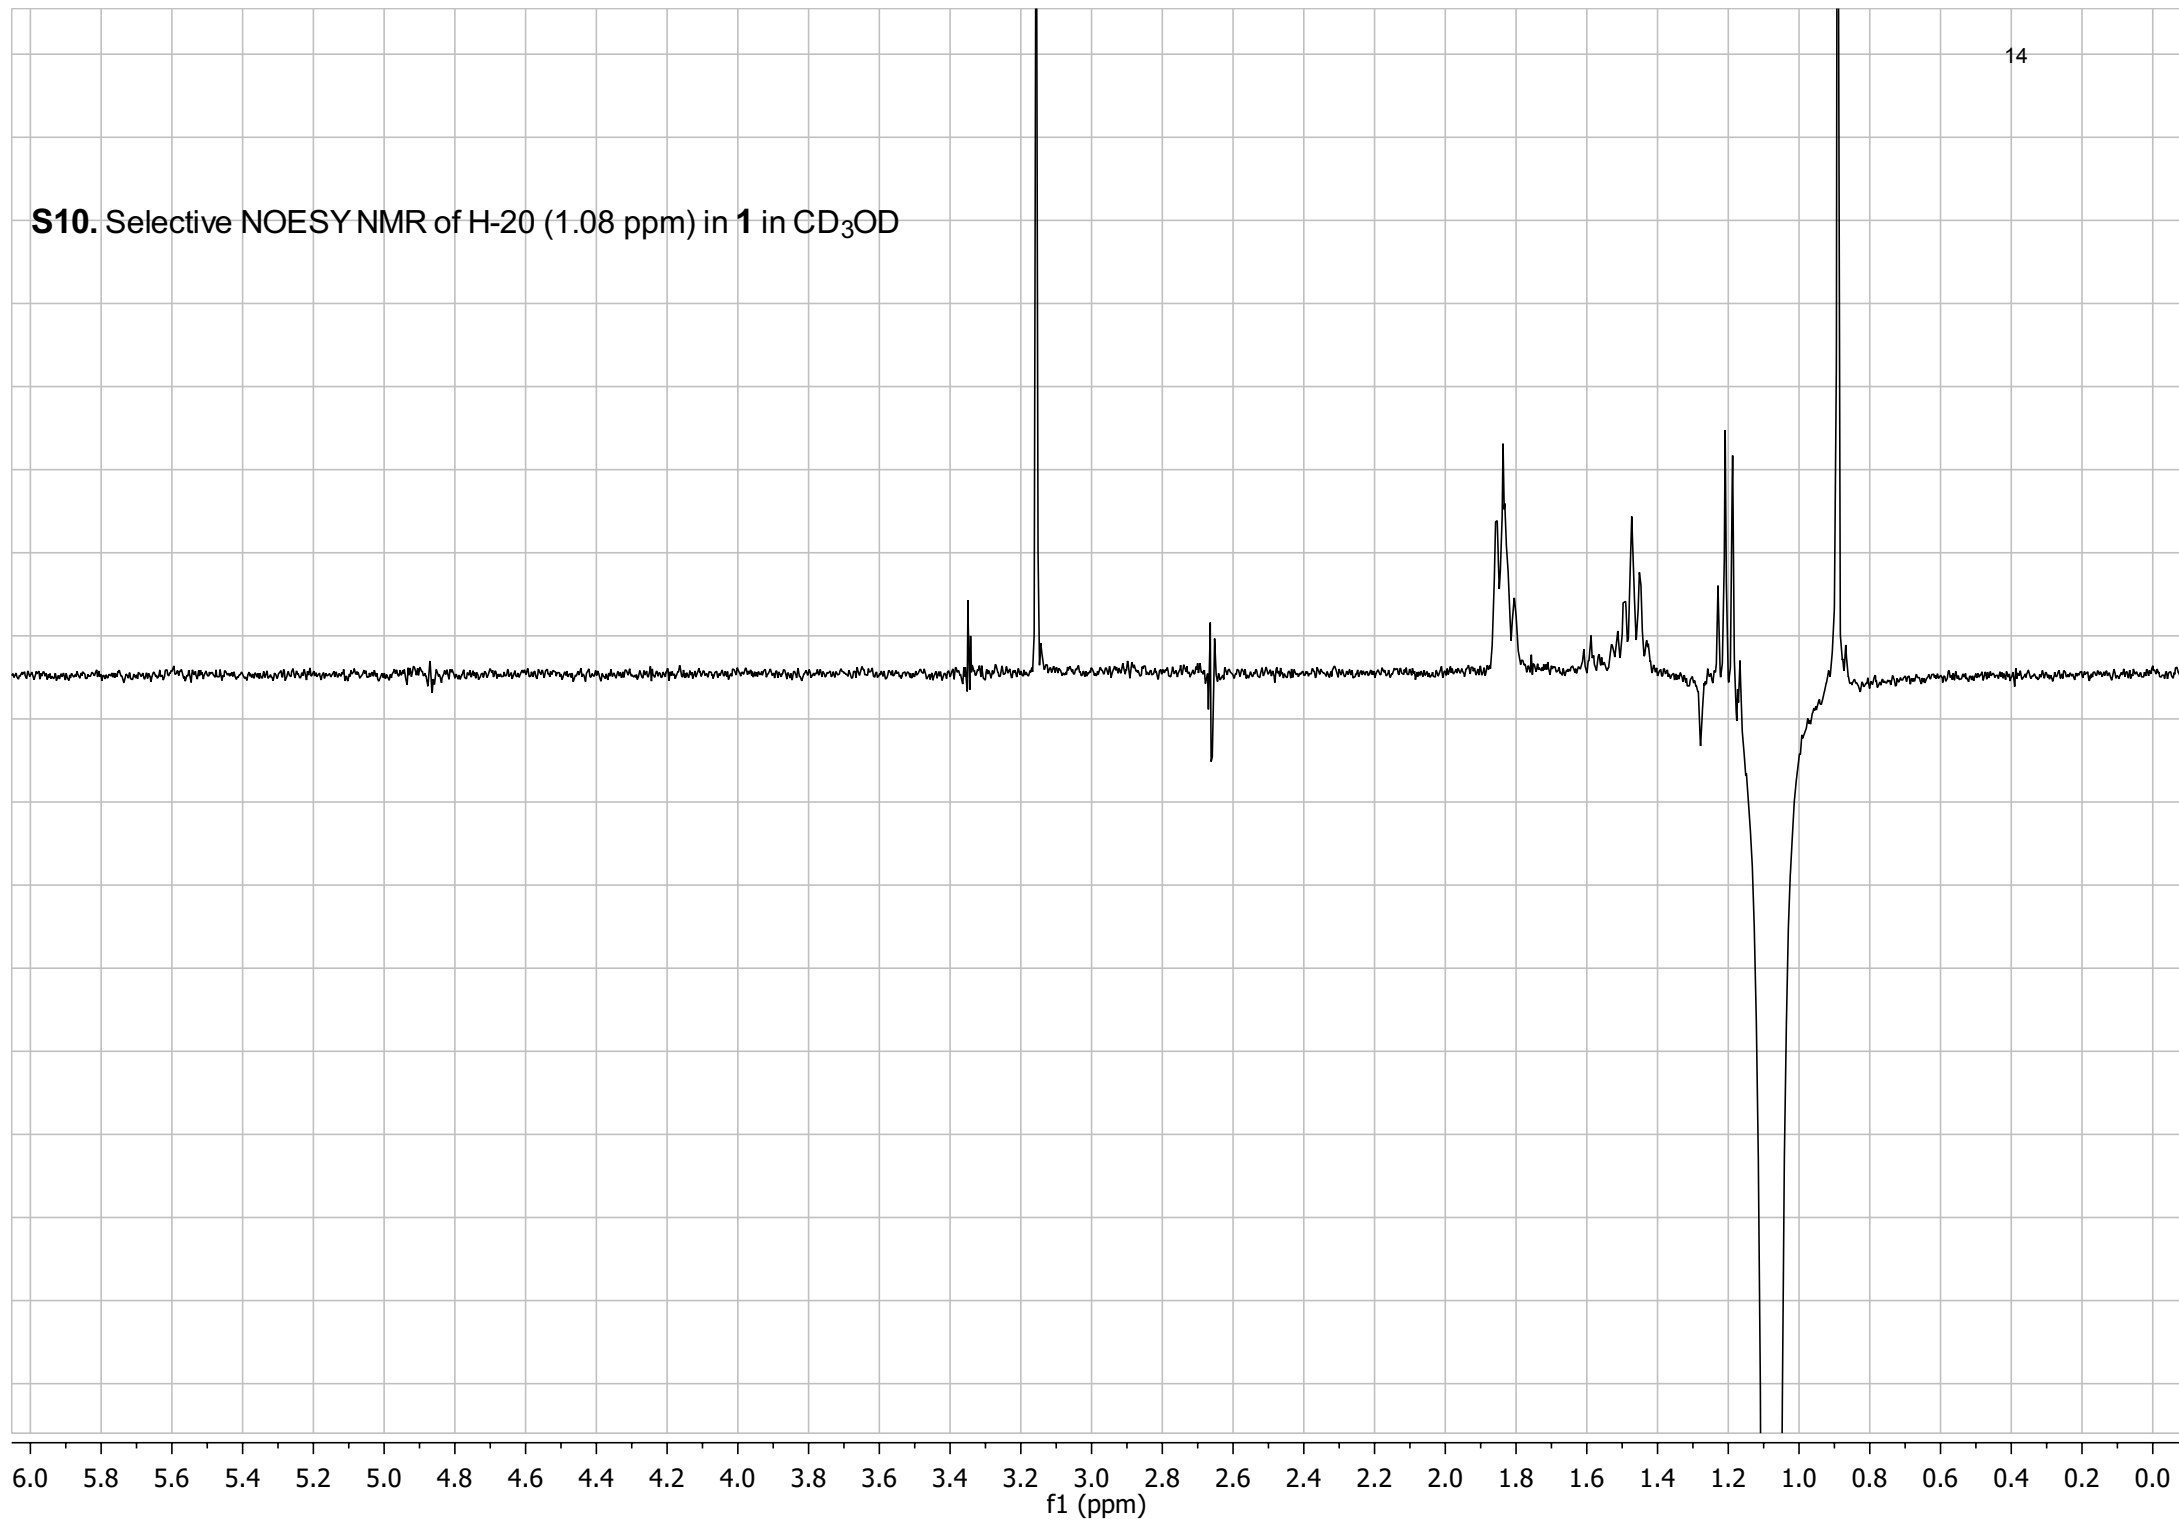

**S11.** Selective NOESY NMR of H-19 (0.89 ppm) in **1** in CD<sub>3</sub>OD

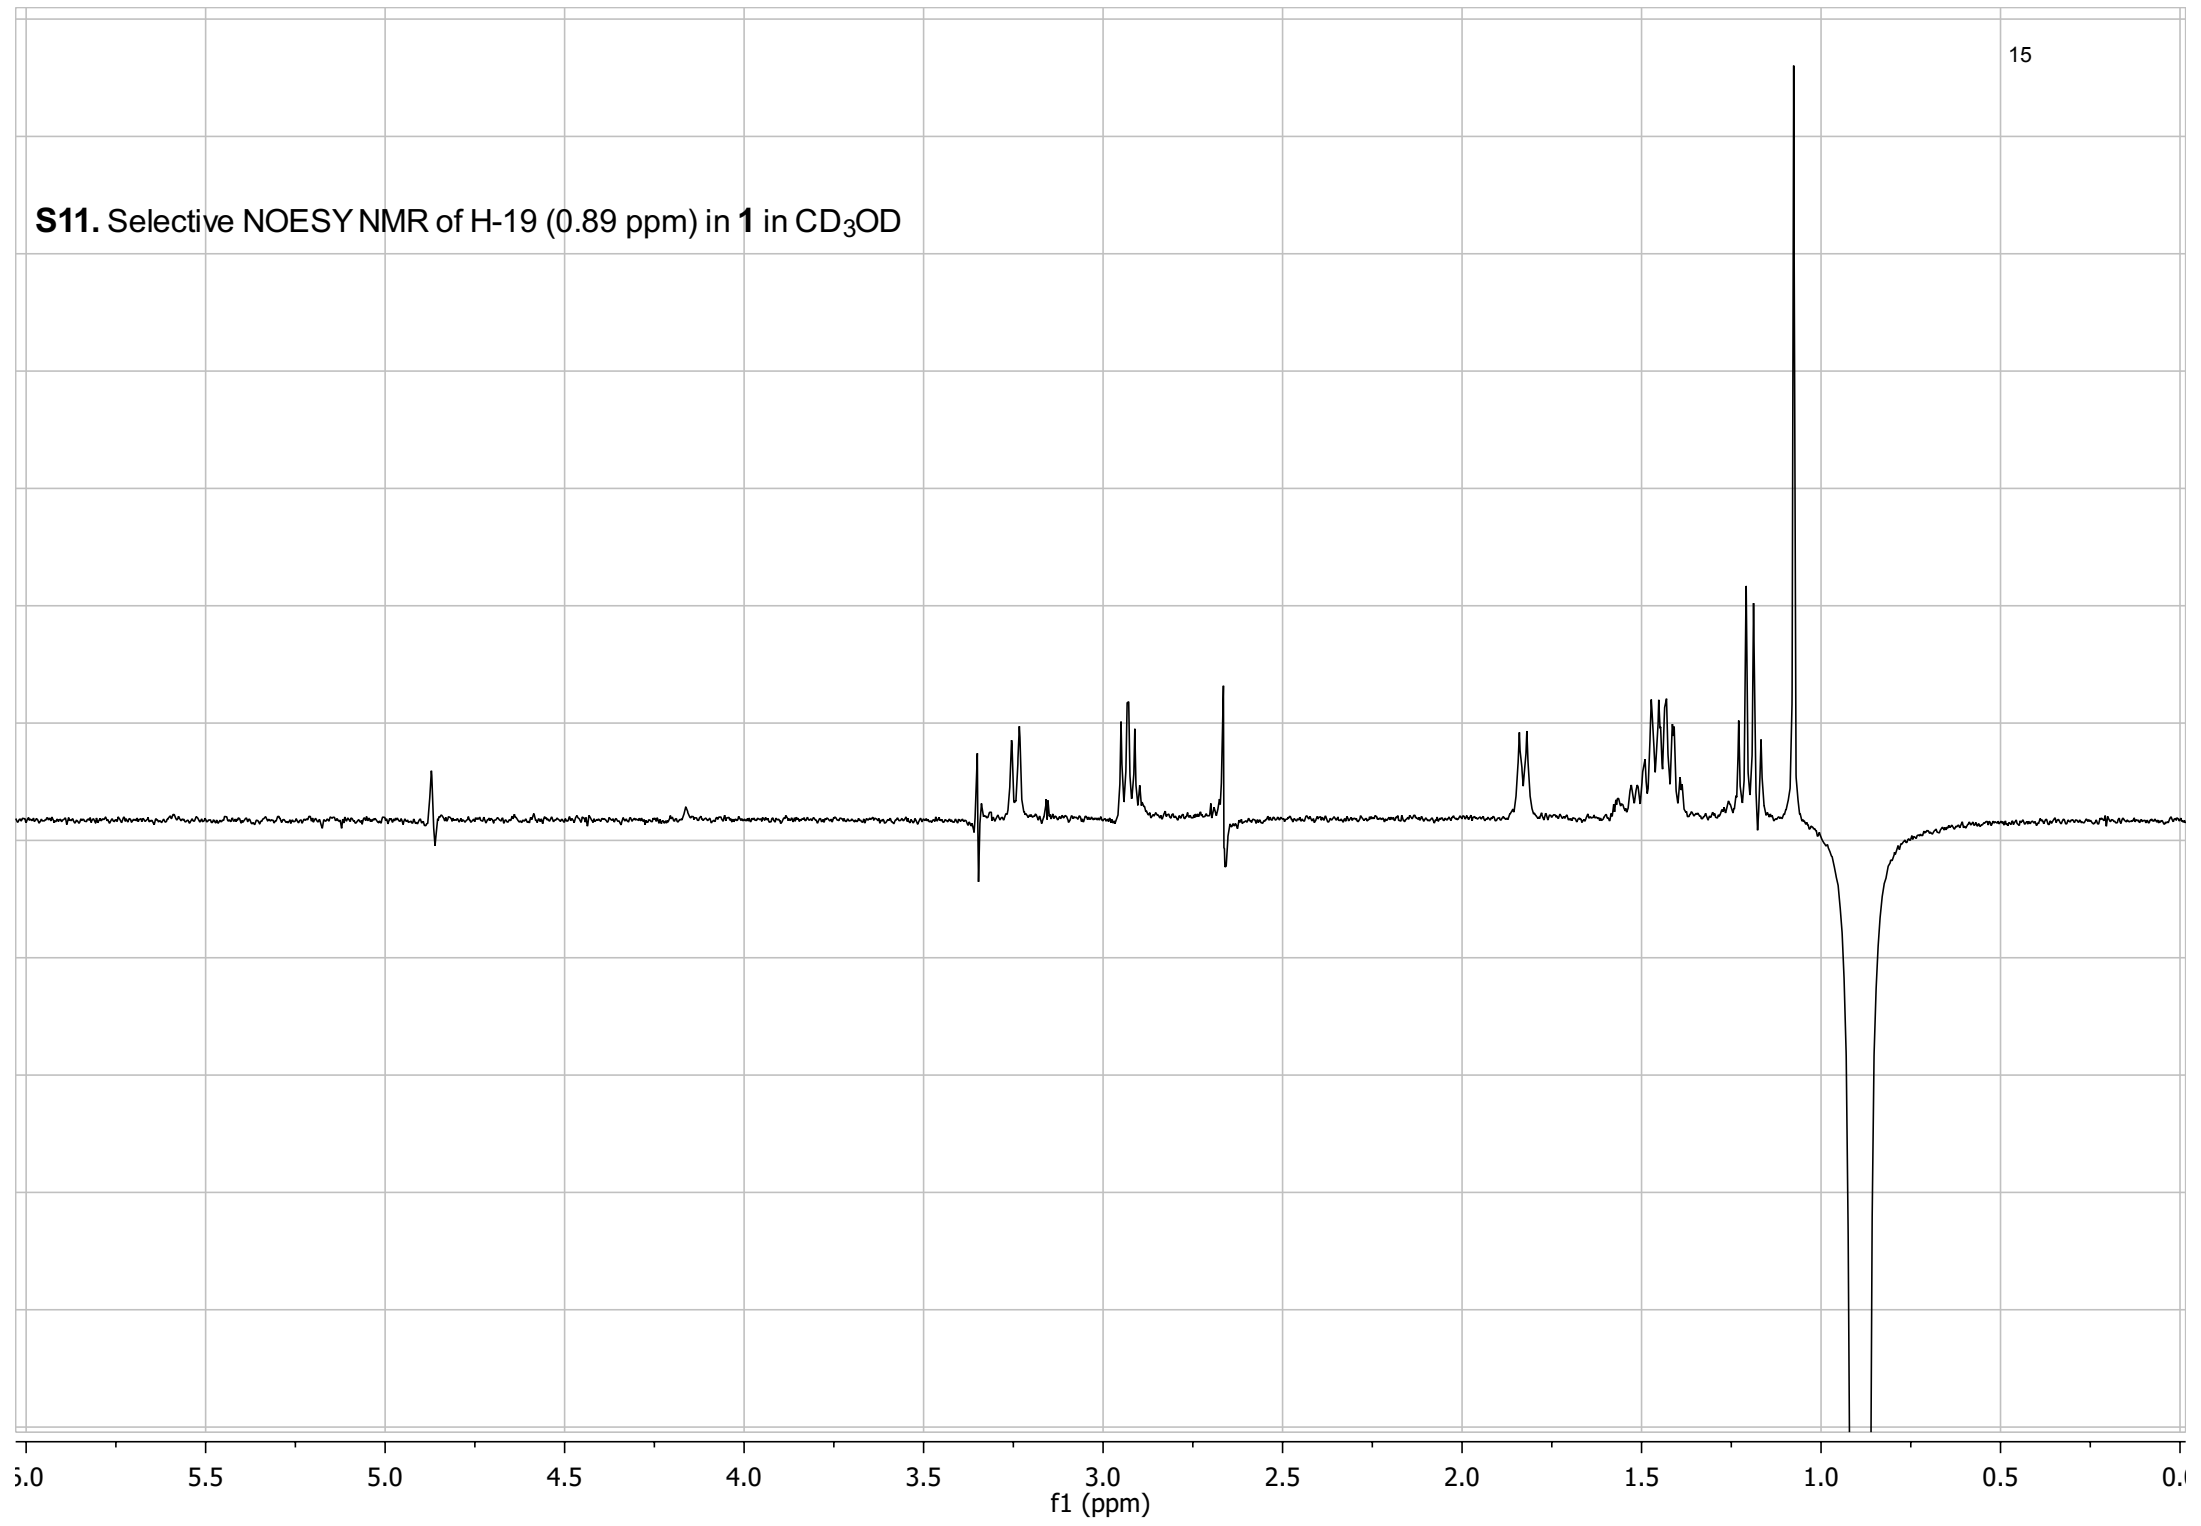





S13. <sup>13</sup>C NMR of 2 in CD<sub>3</sub>OD

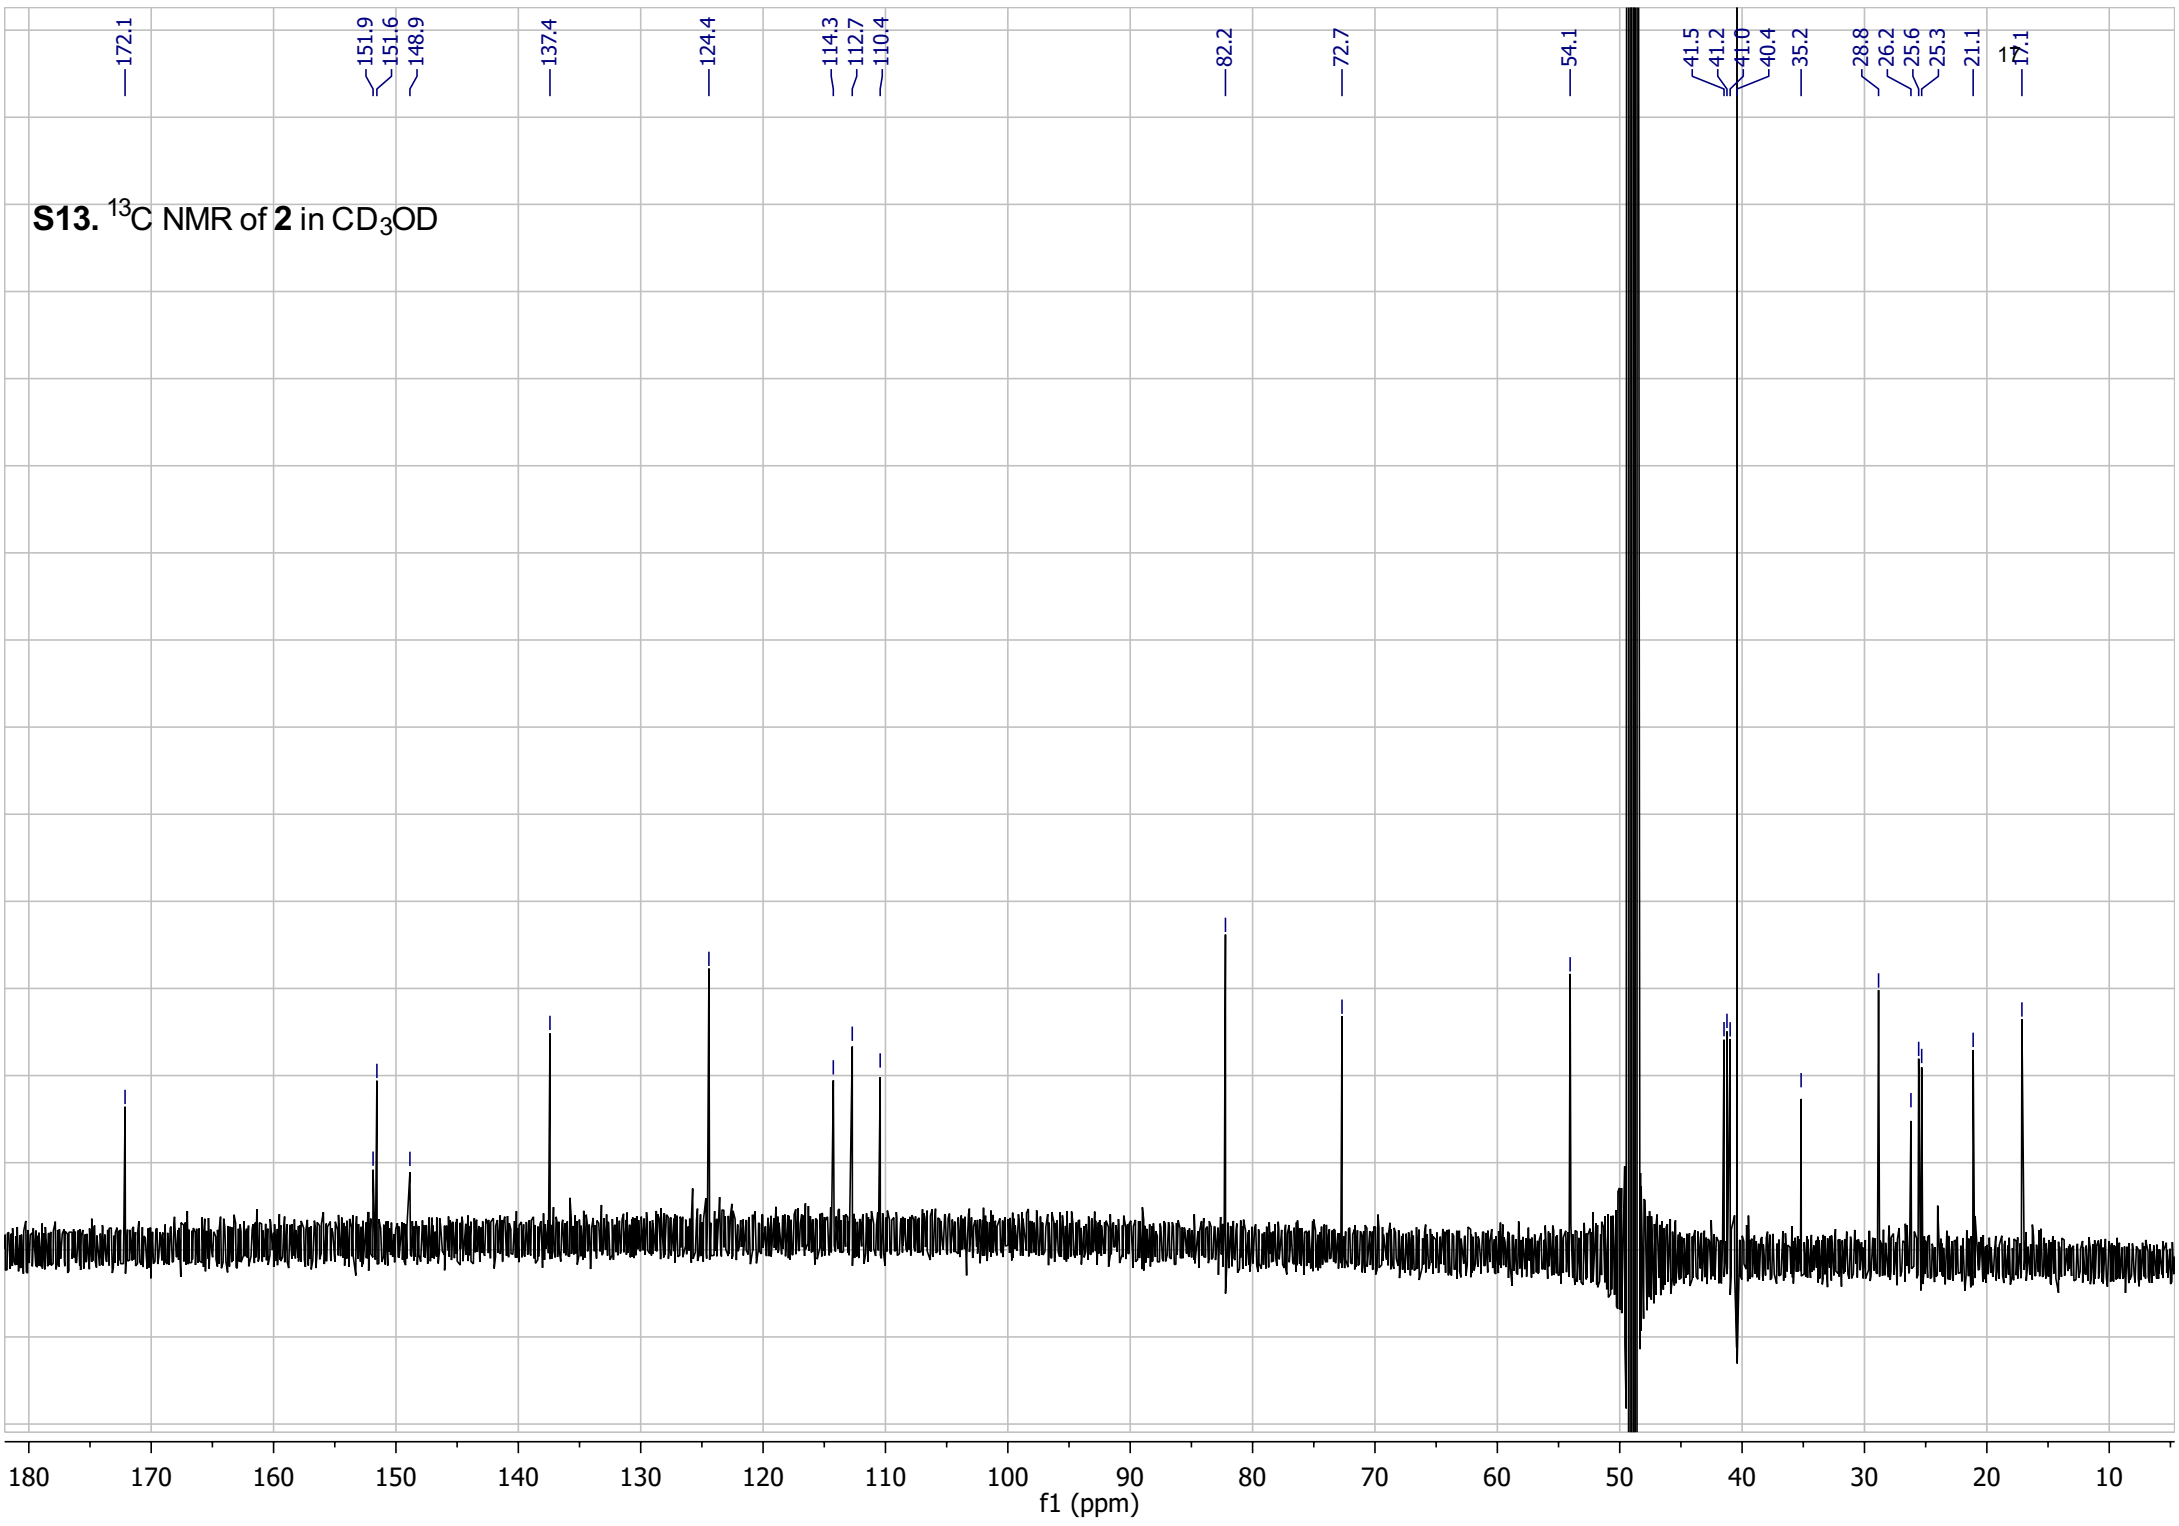

S14. DEPT NMR of **2** in CD<sub>3</sub>OD

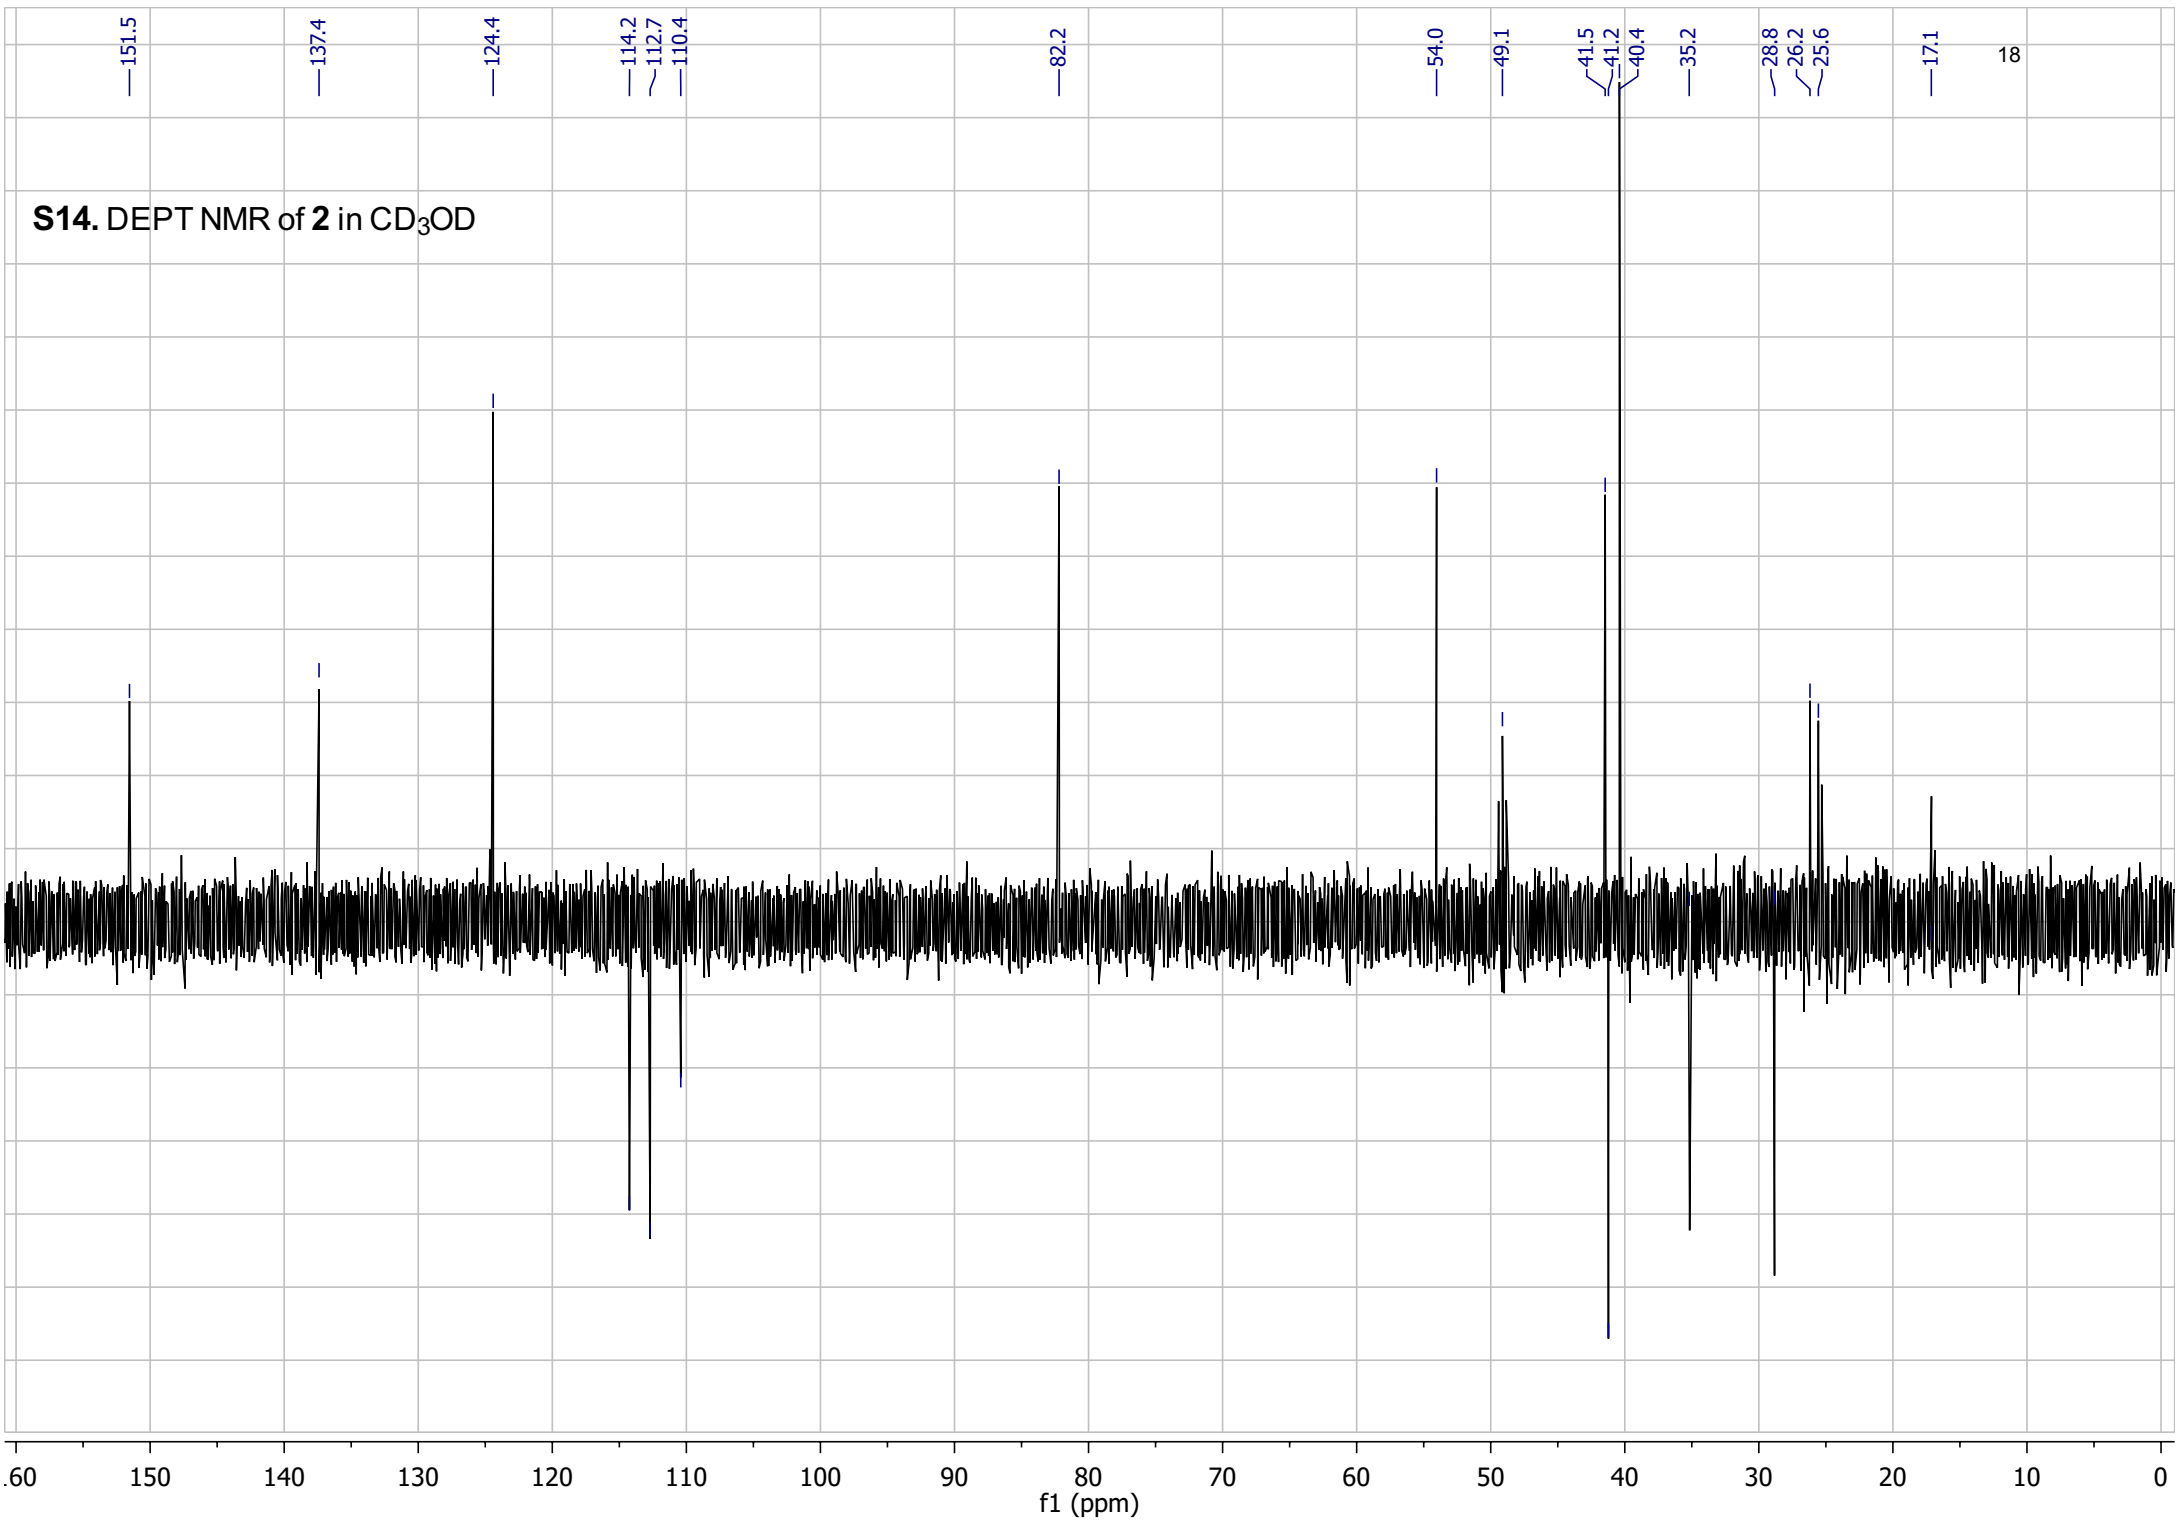

S15. COSY NMR of 2 in CD<sub>3</sub>OD

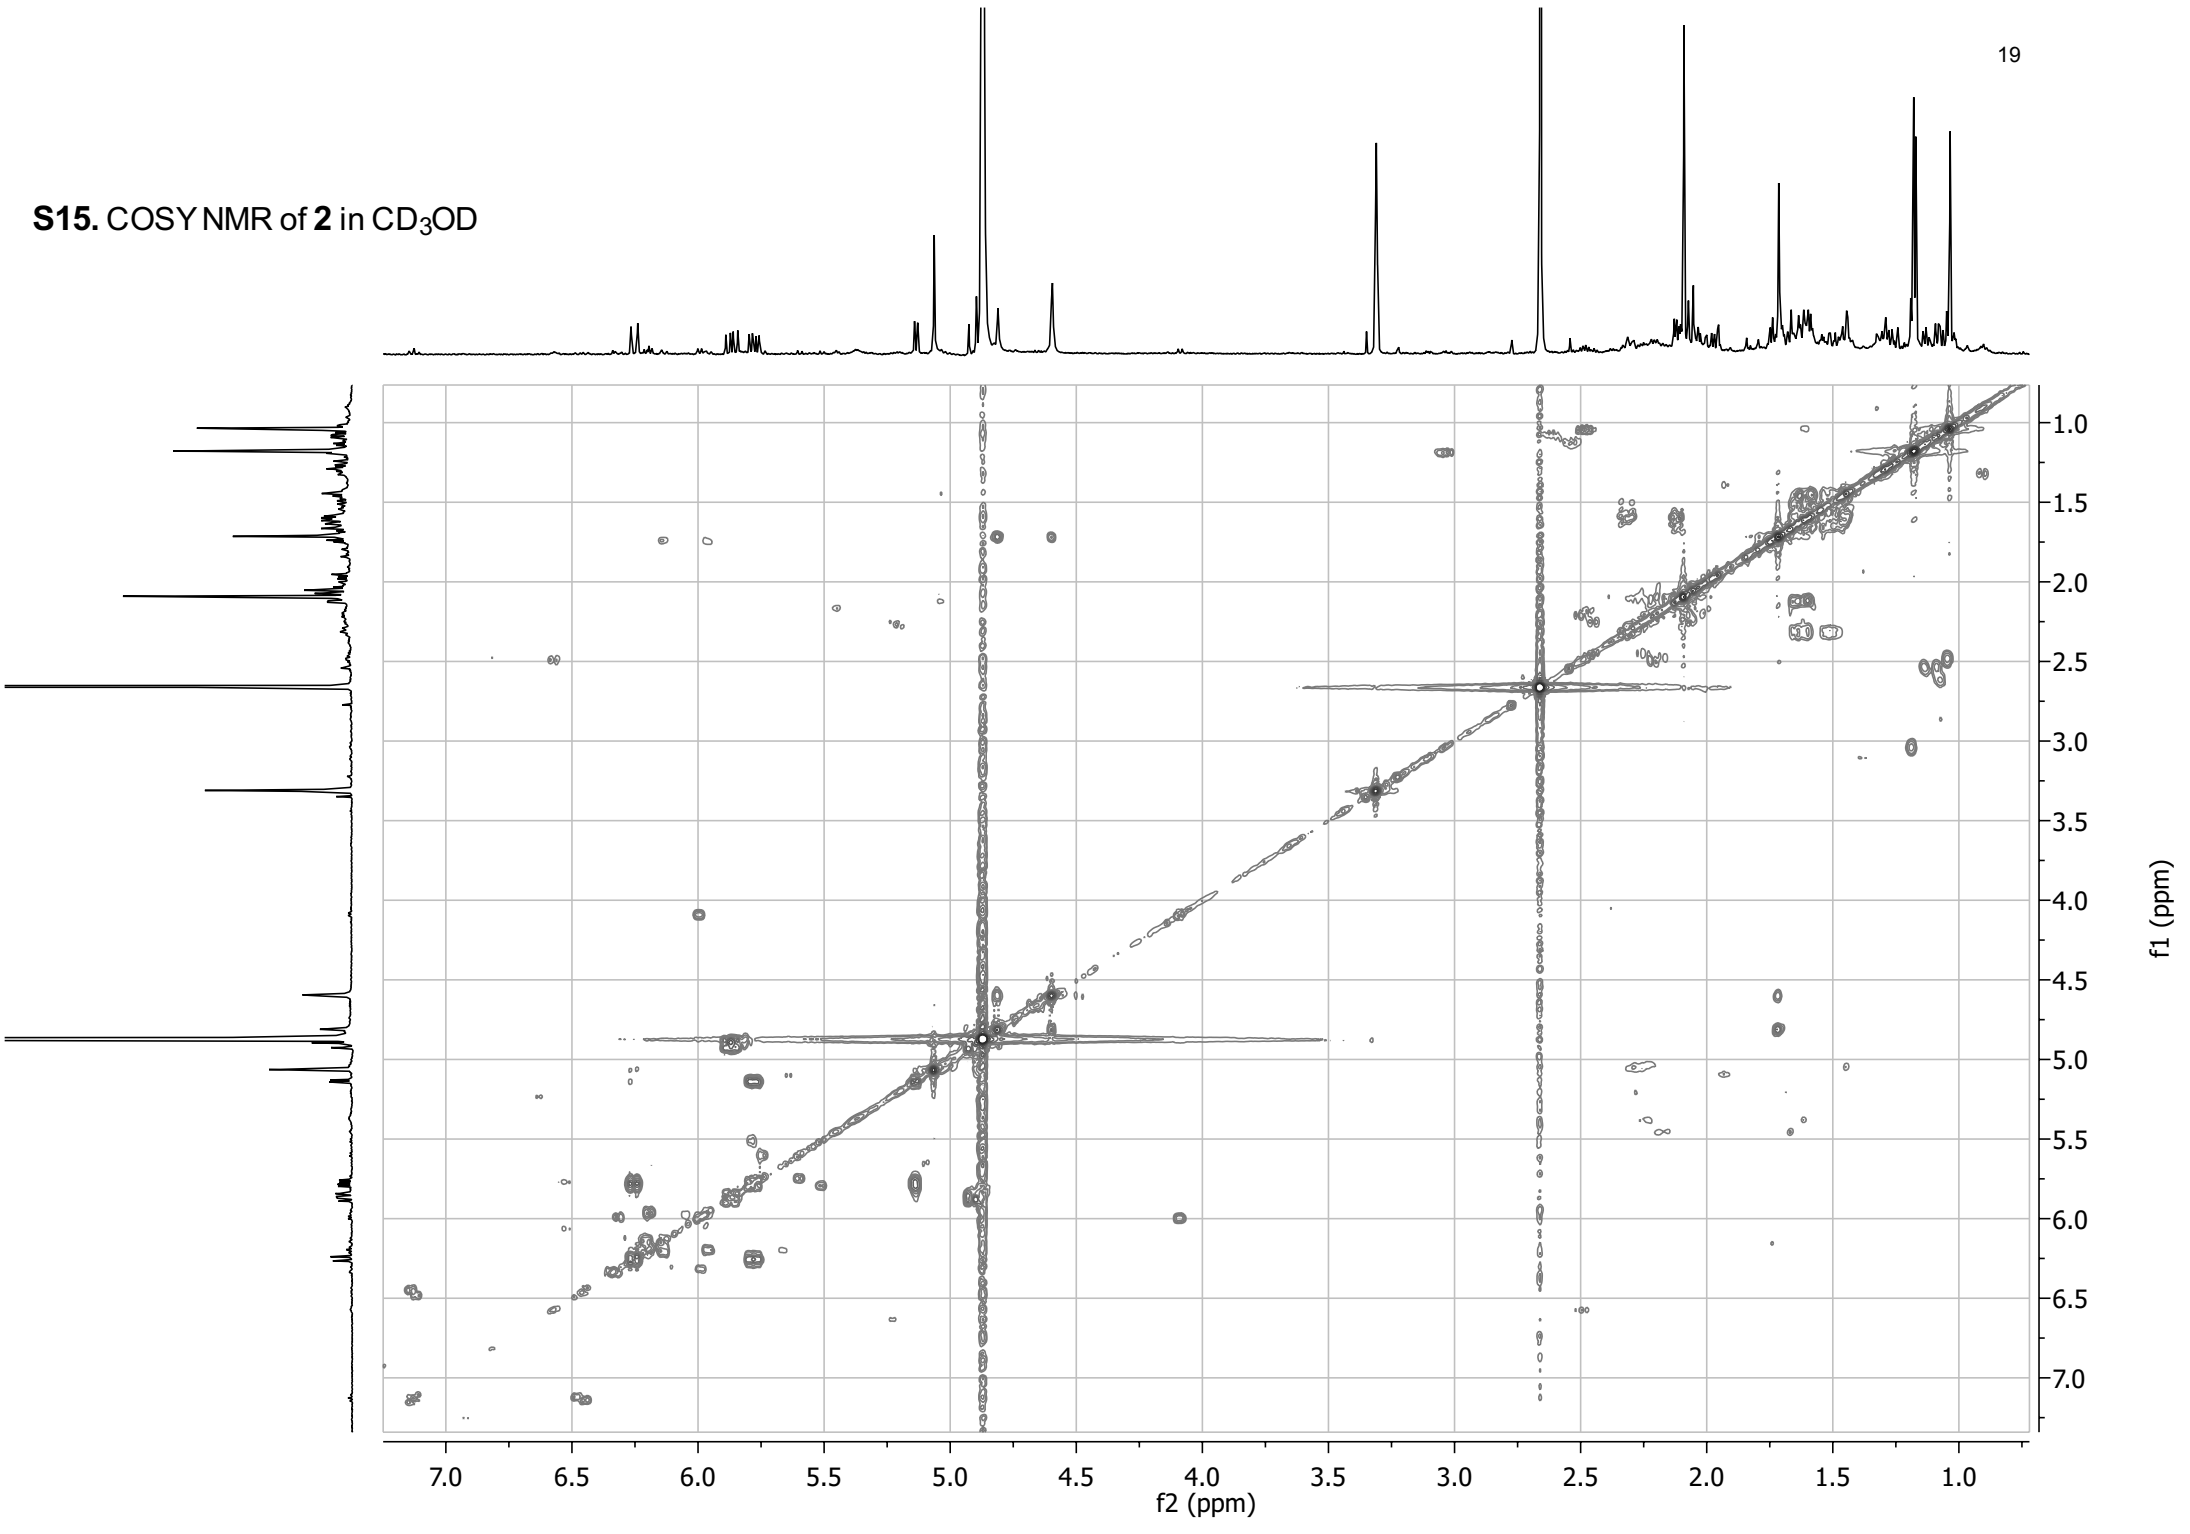

S16. HSQC NMR of **2** in CD<sub>3</sub>OD

20

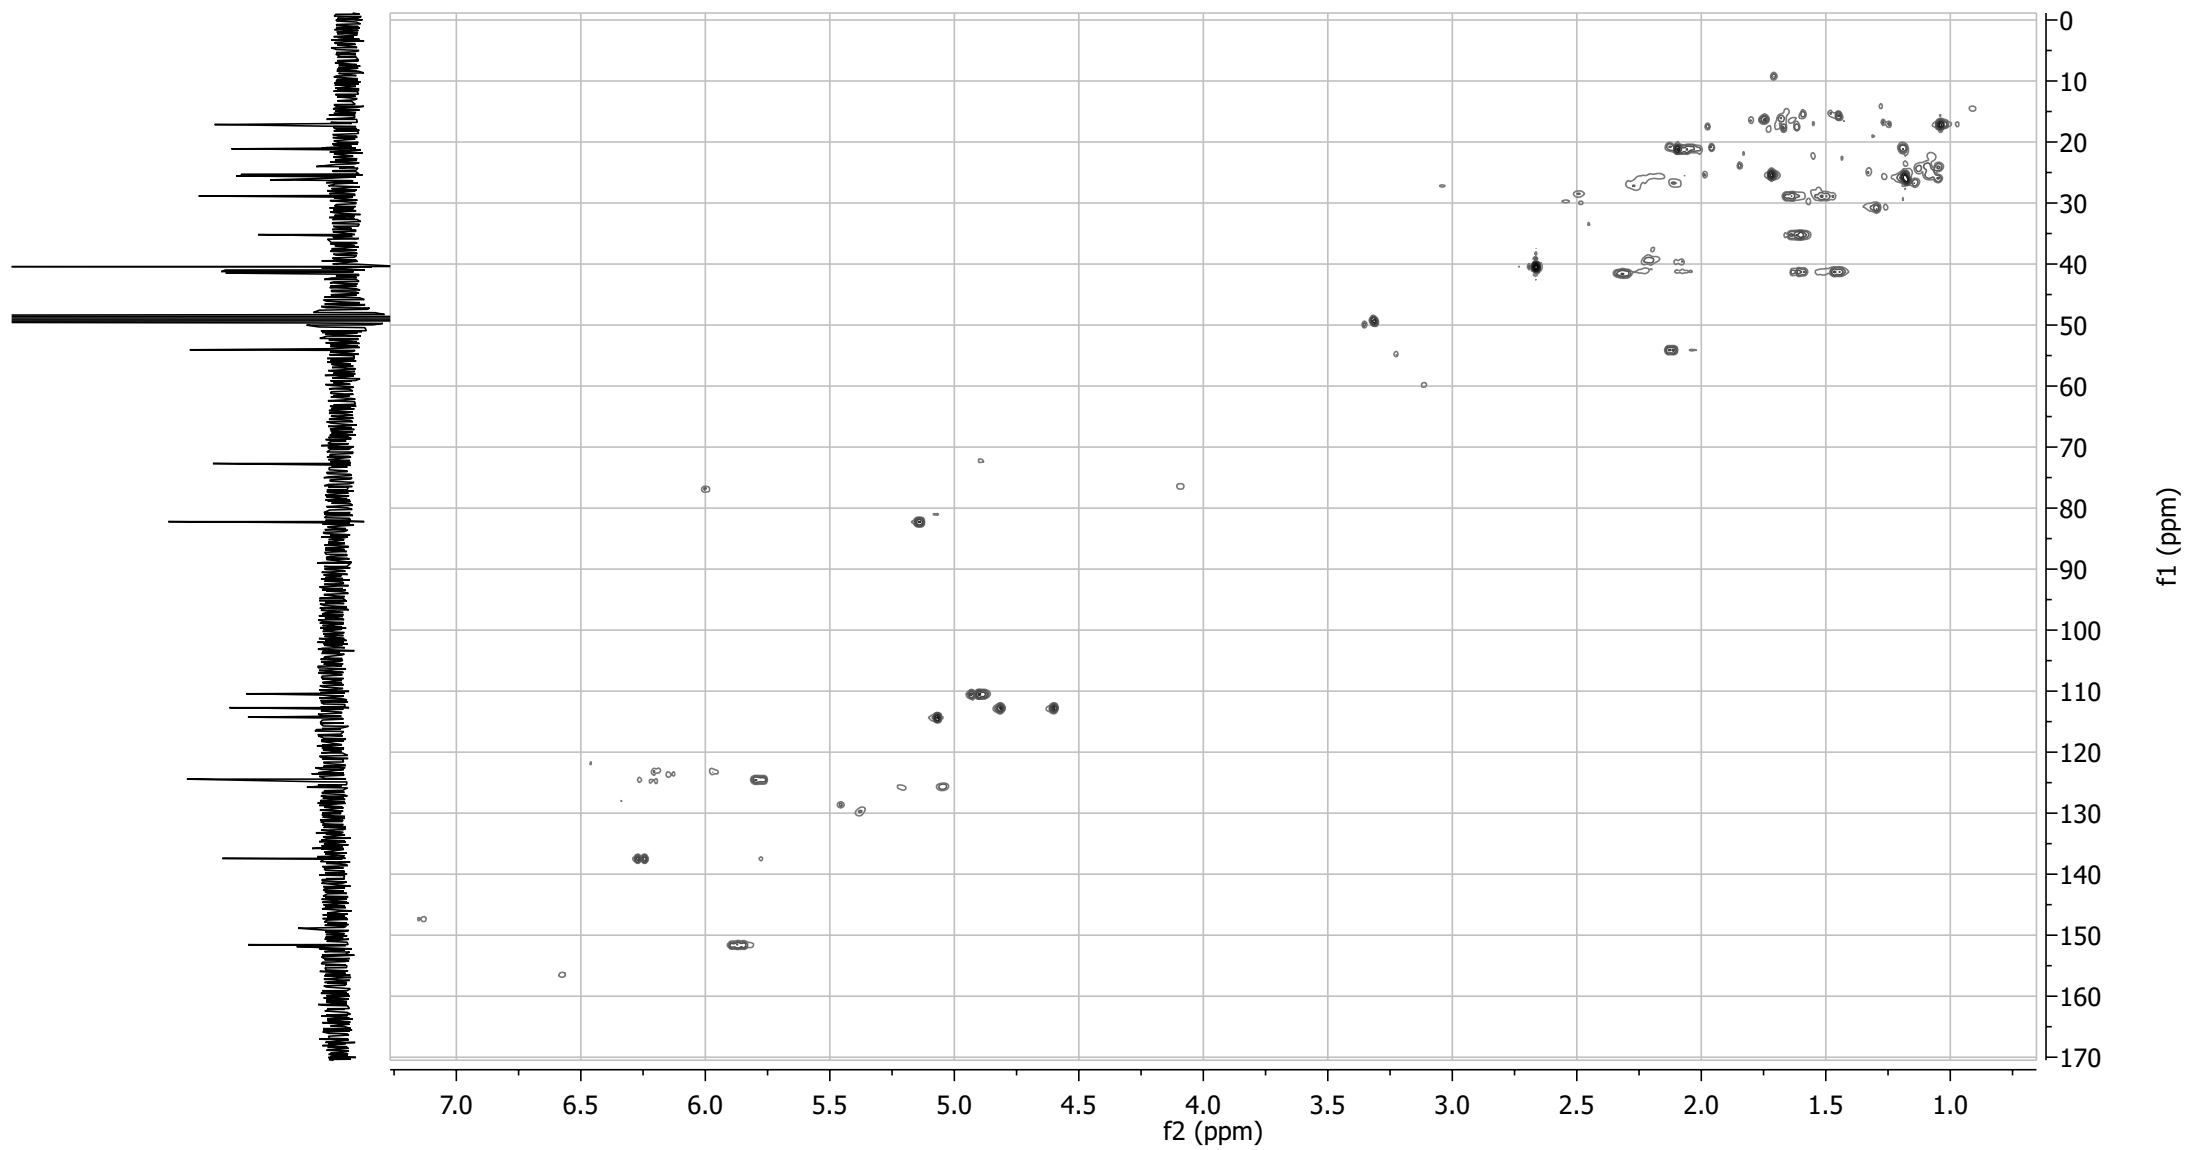

S17. HMBC NMR of **2** in CD<sub>3</sub>OD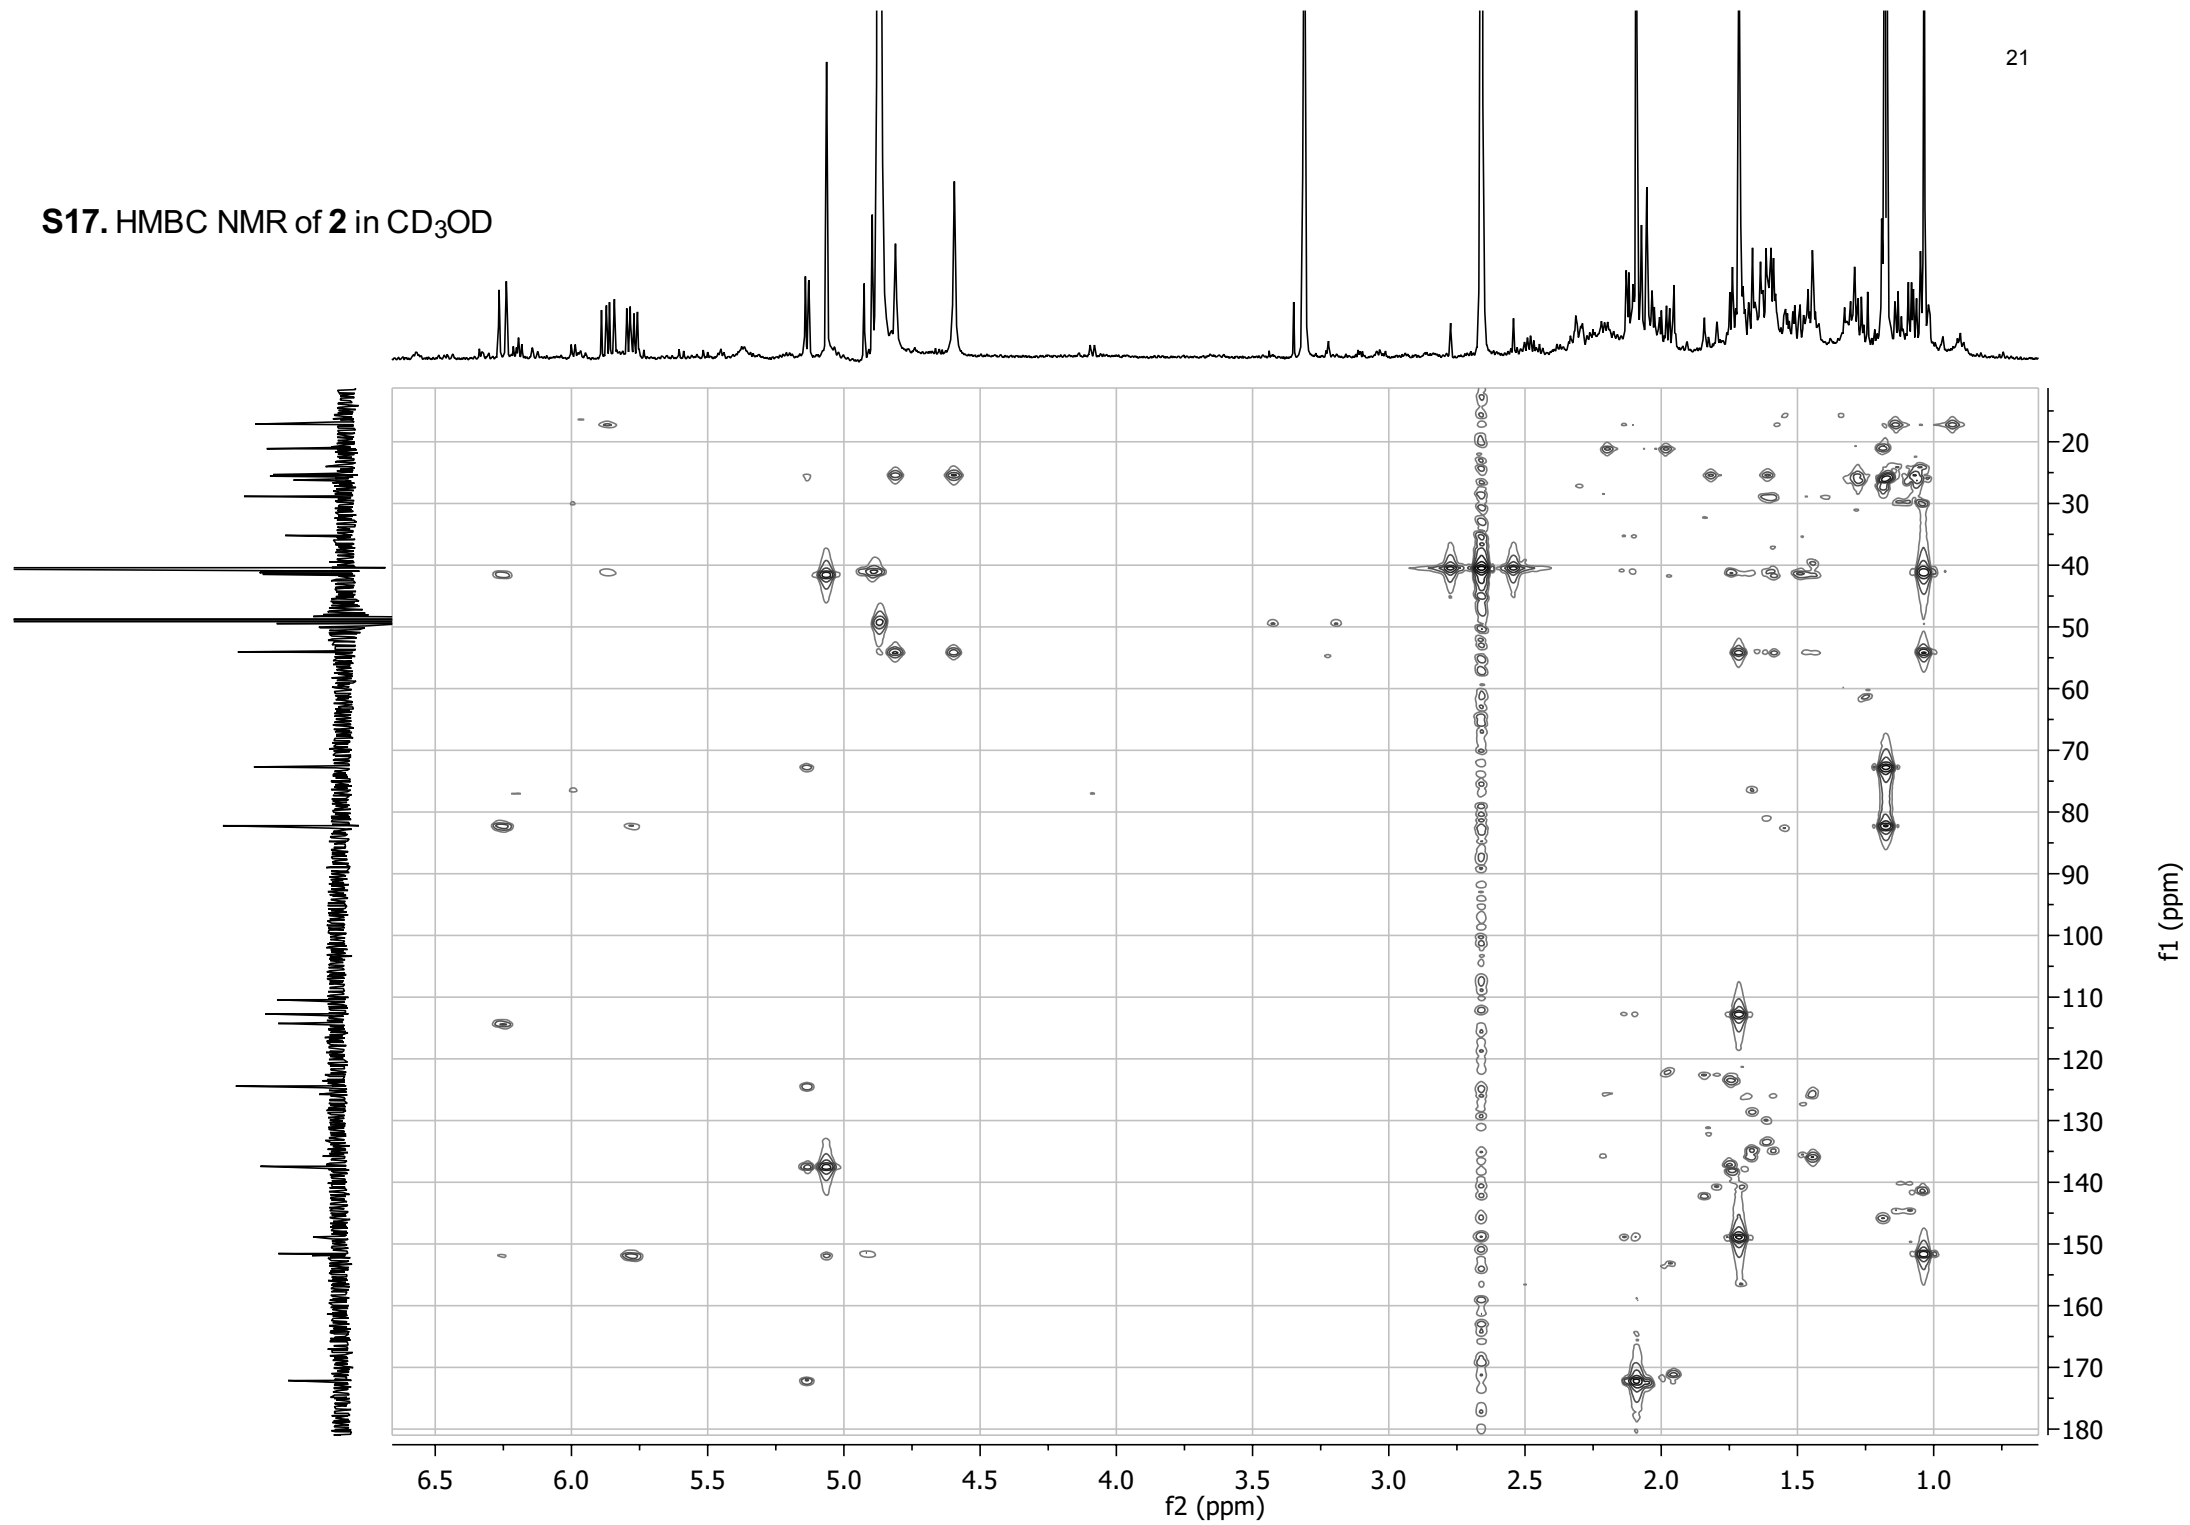

**S18.** Selective NOESY NMR of H-17 (5.14 ppm) in **2** in CD<sub>3</sub>OD

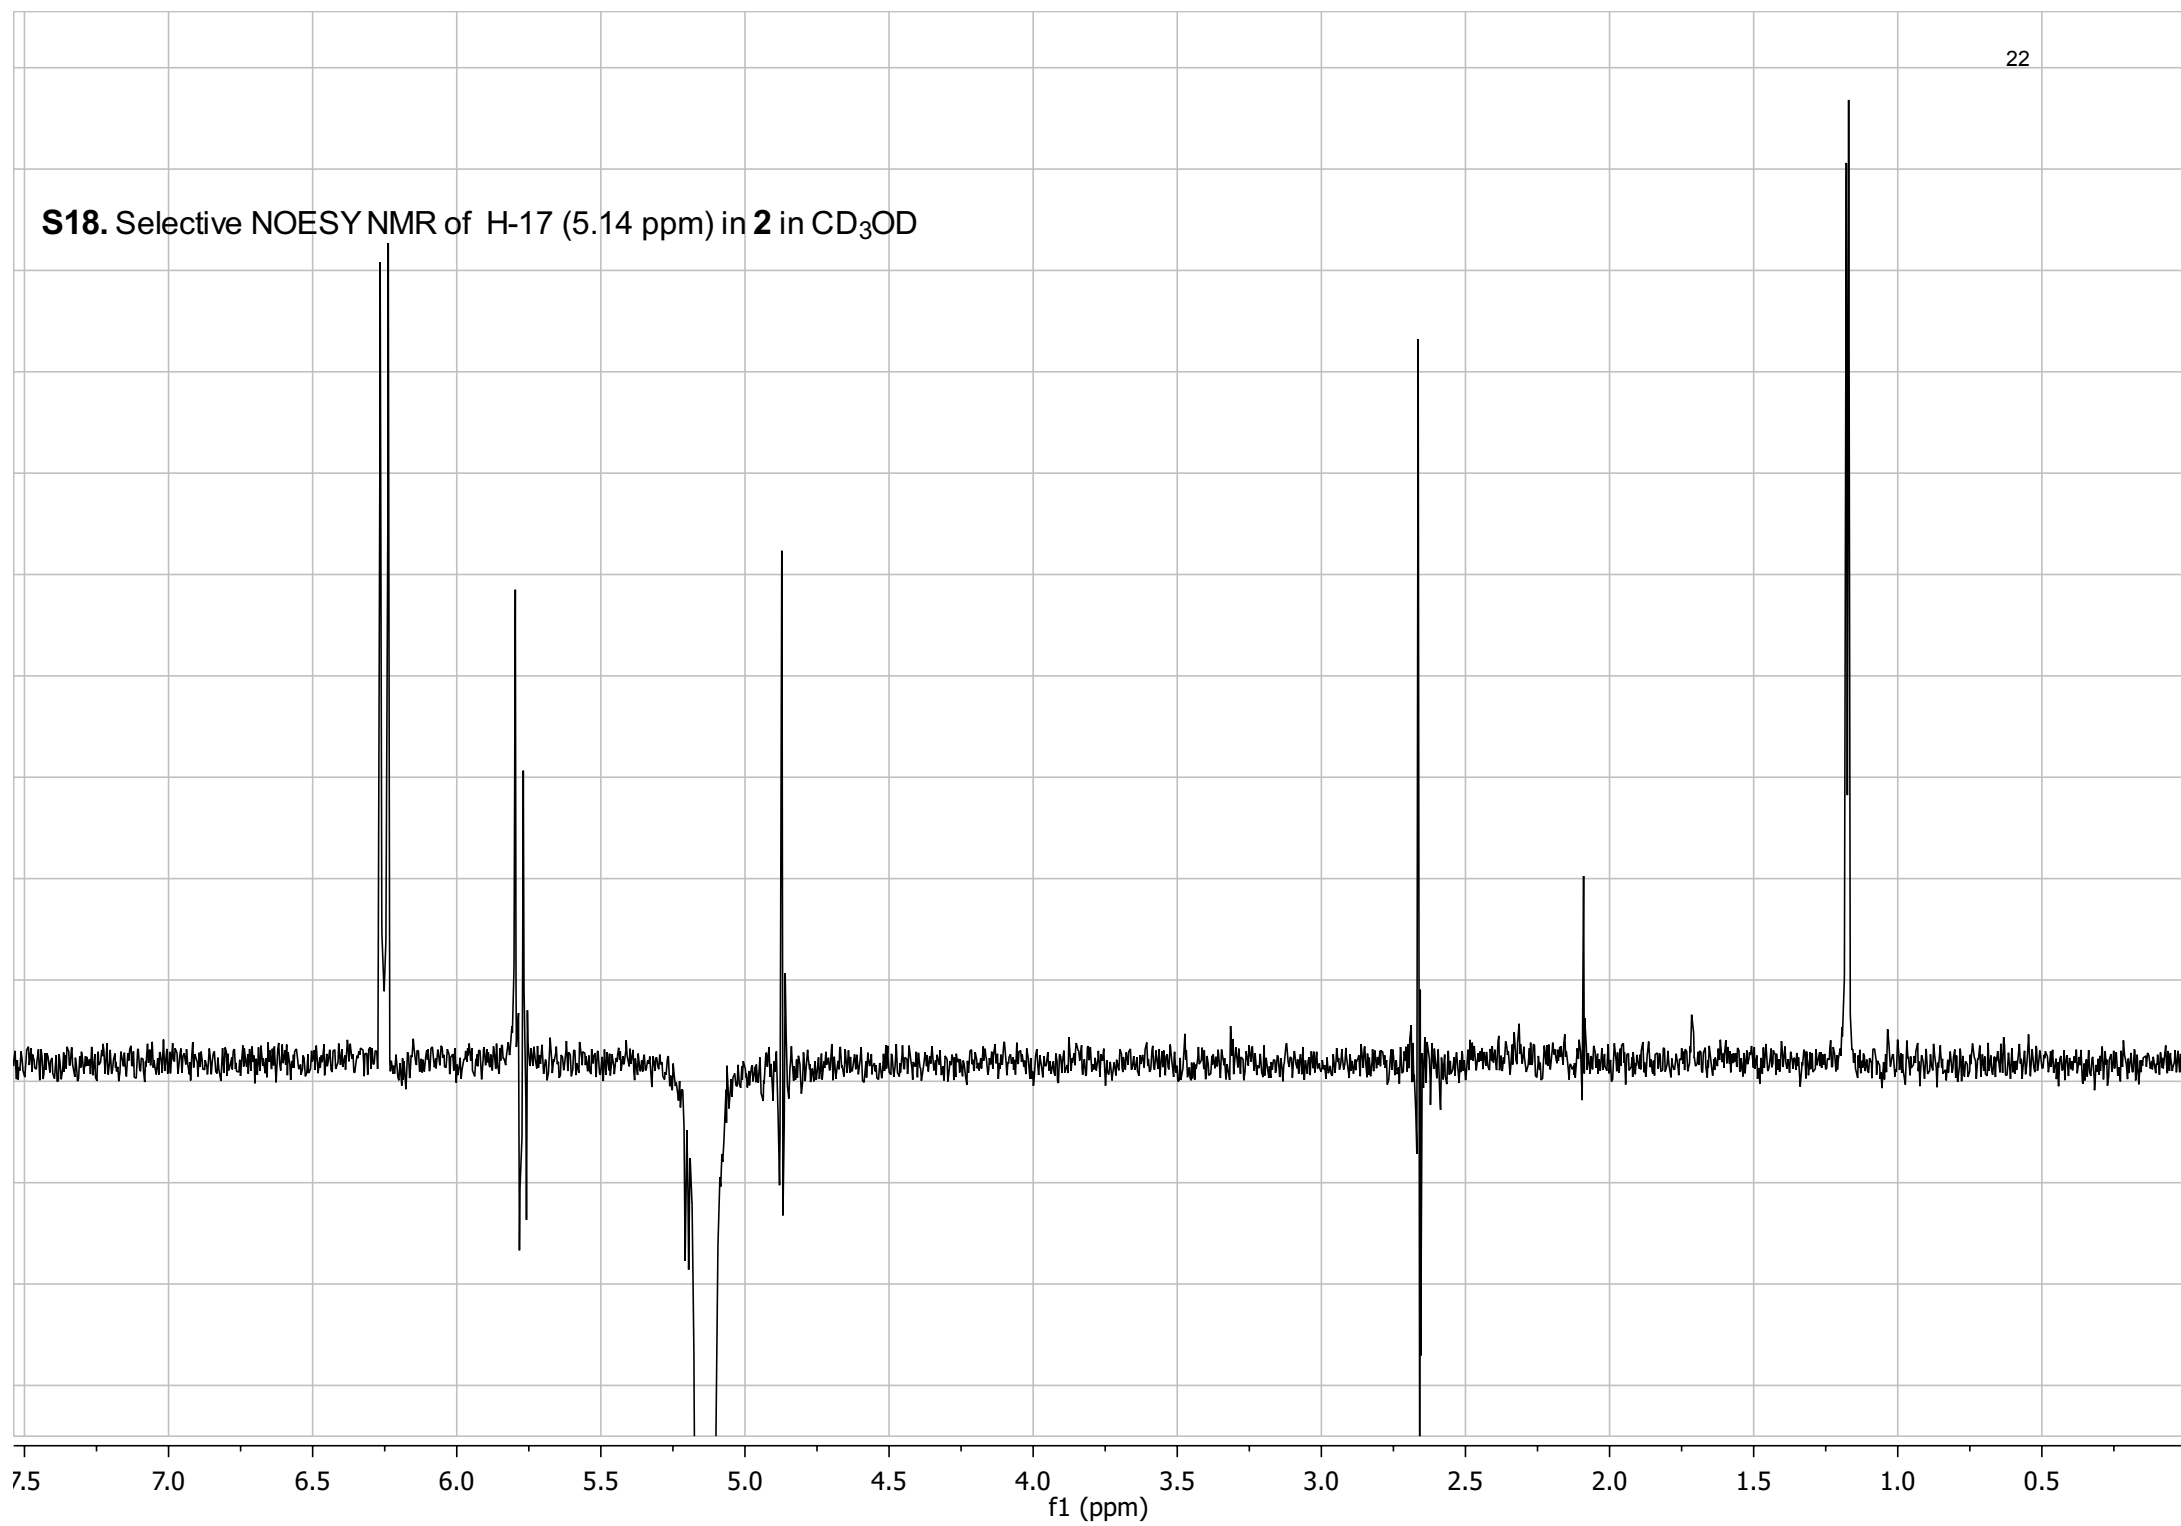

**S19.** Selective NOESY NMR of H-4 (2.31 ppm) in **2** in CD<sub>3</sub>OD

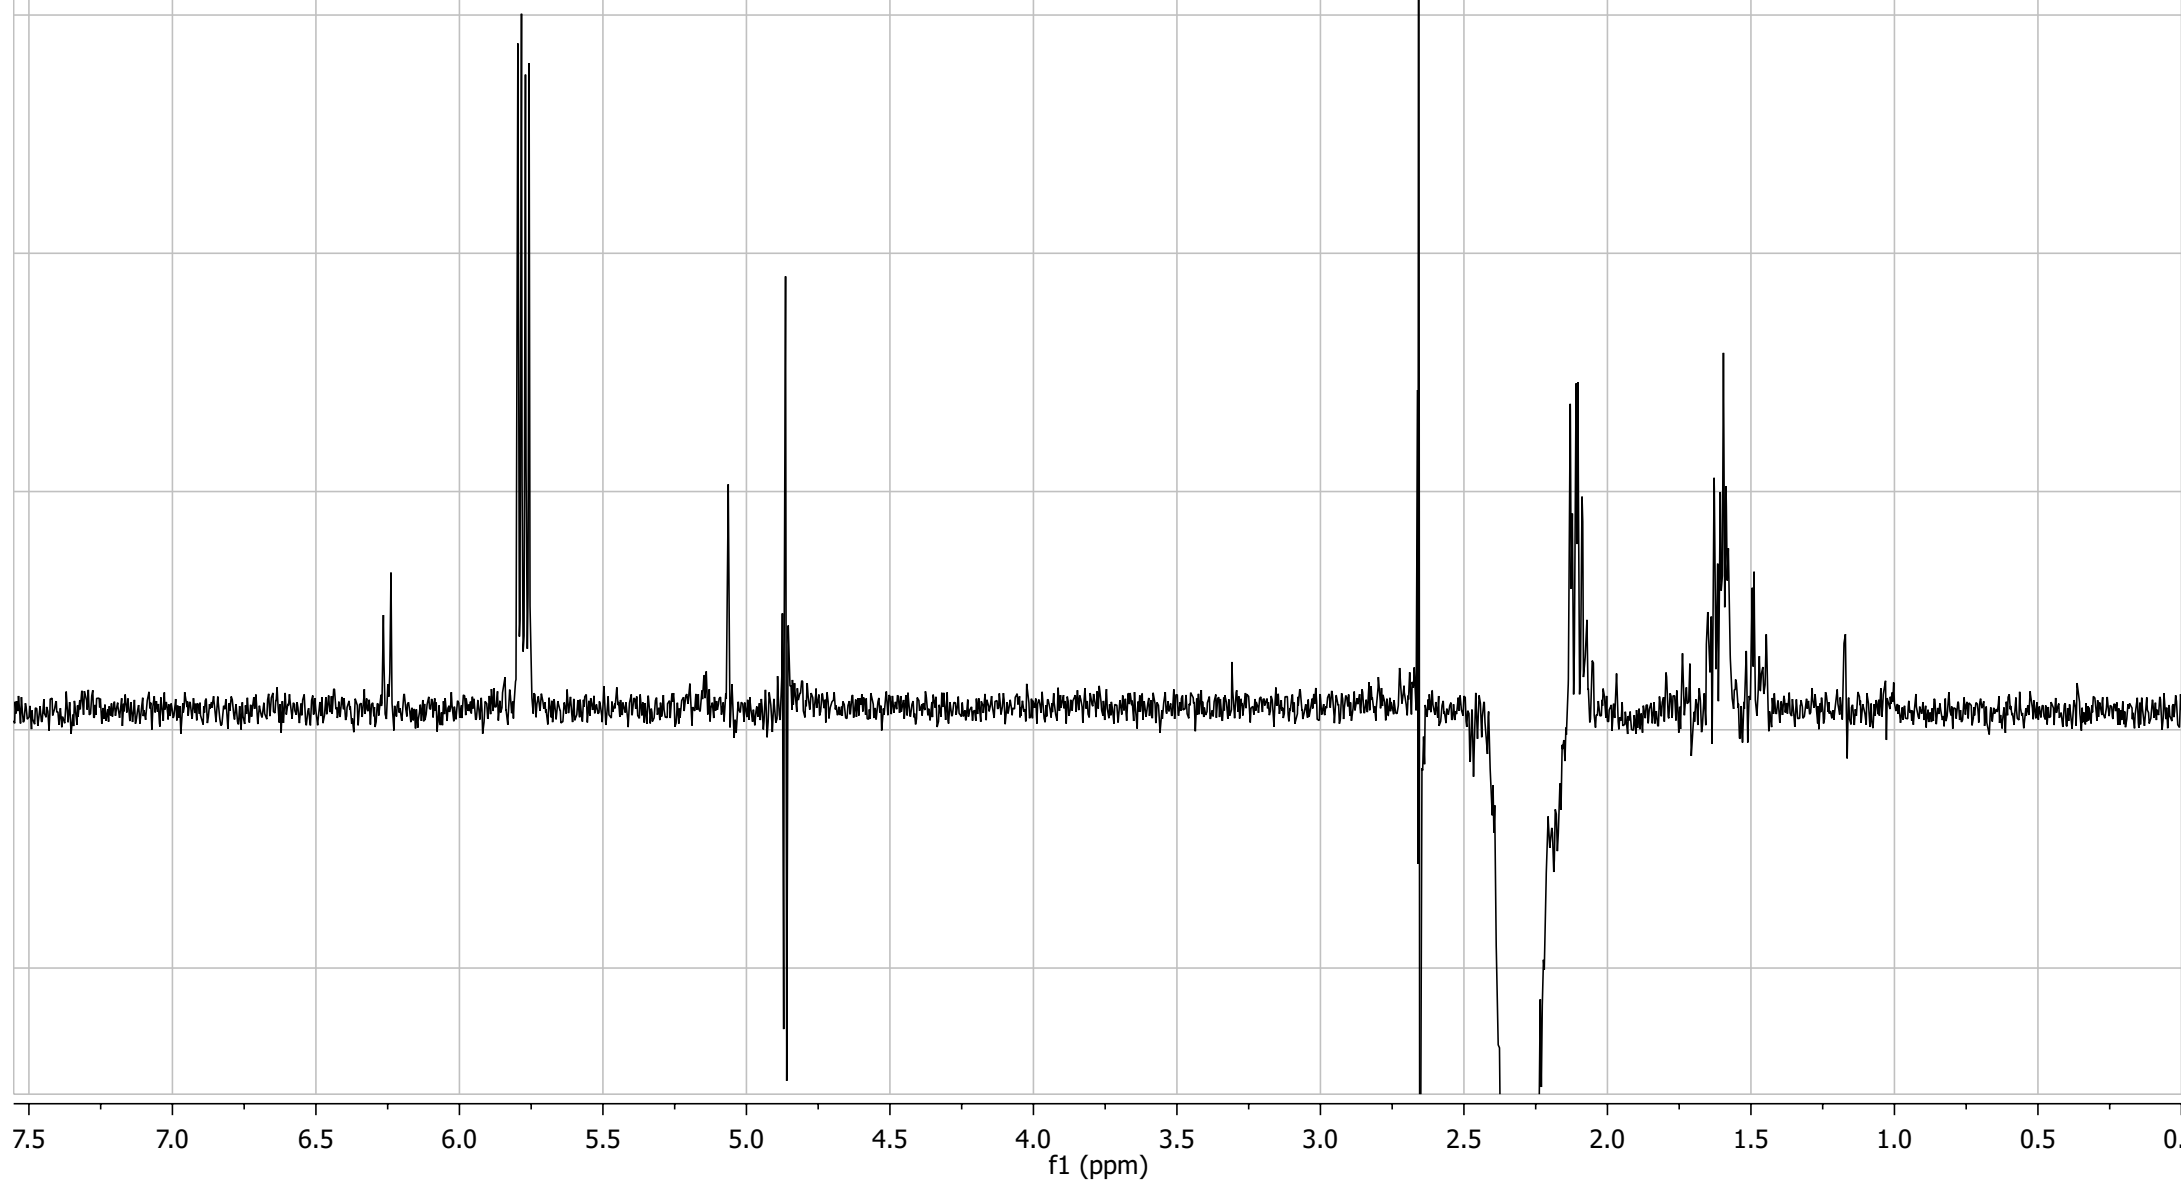

**S20.** Selective NOESY NMR of OAcMe (2.09 ppm) in **2** in CD<sub>3</sub>OD

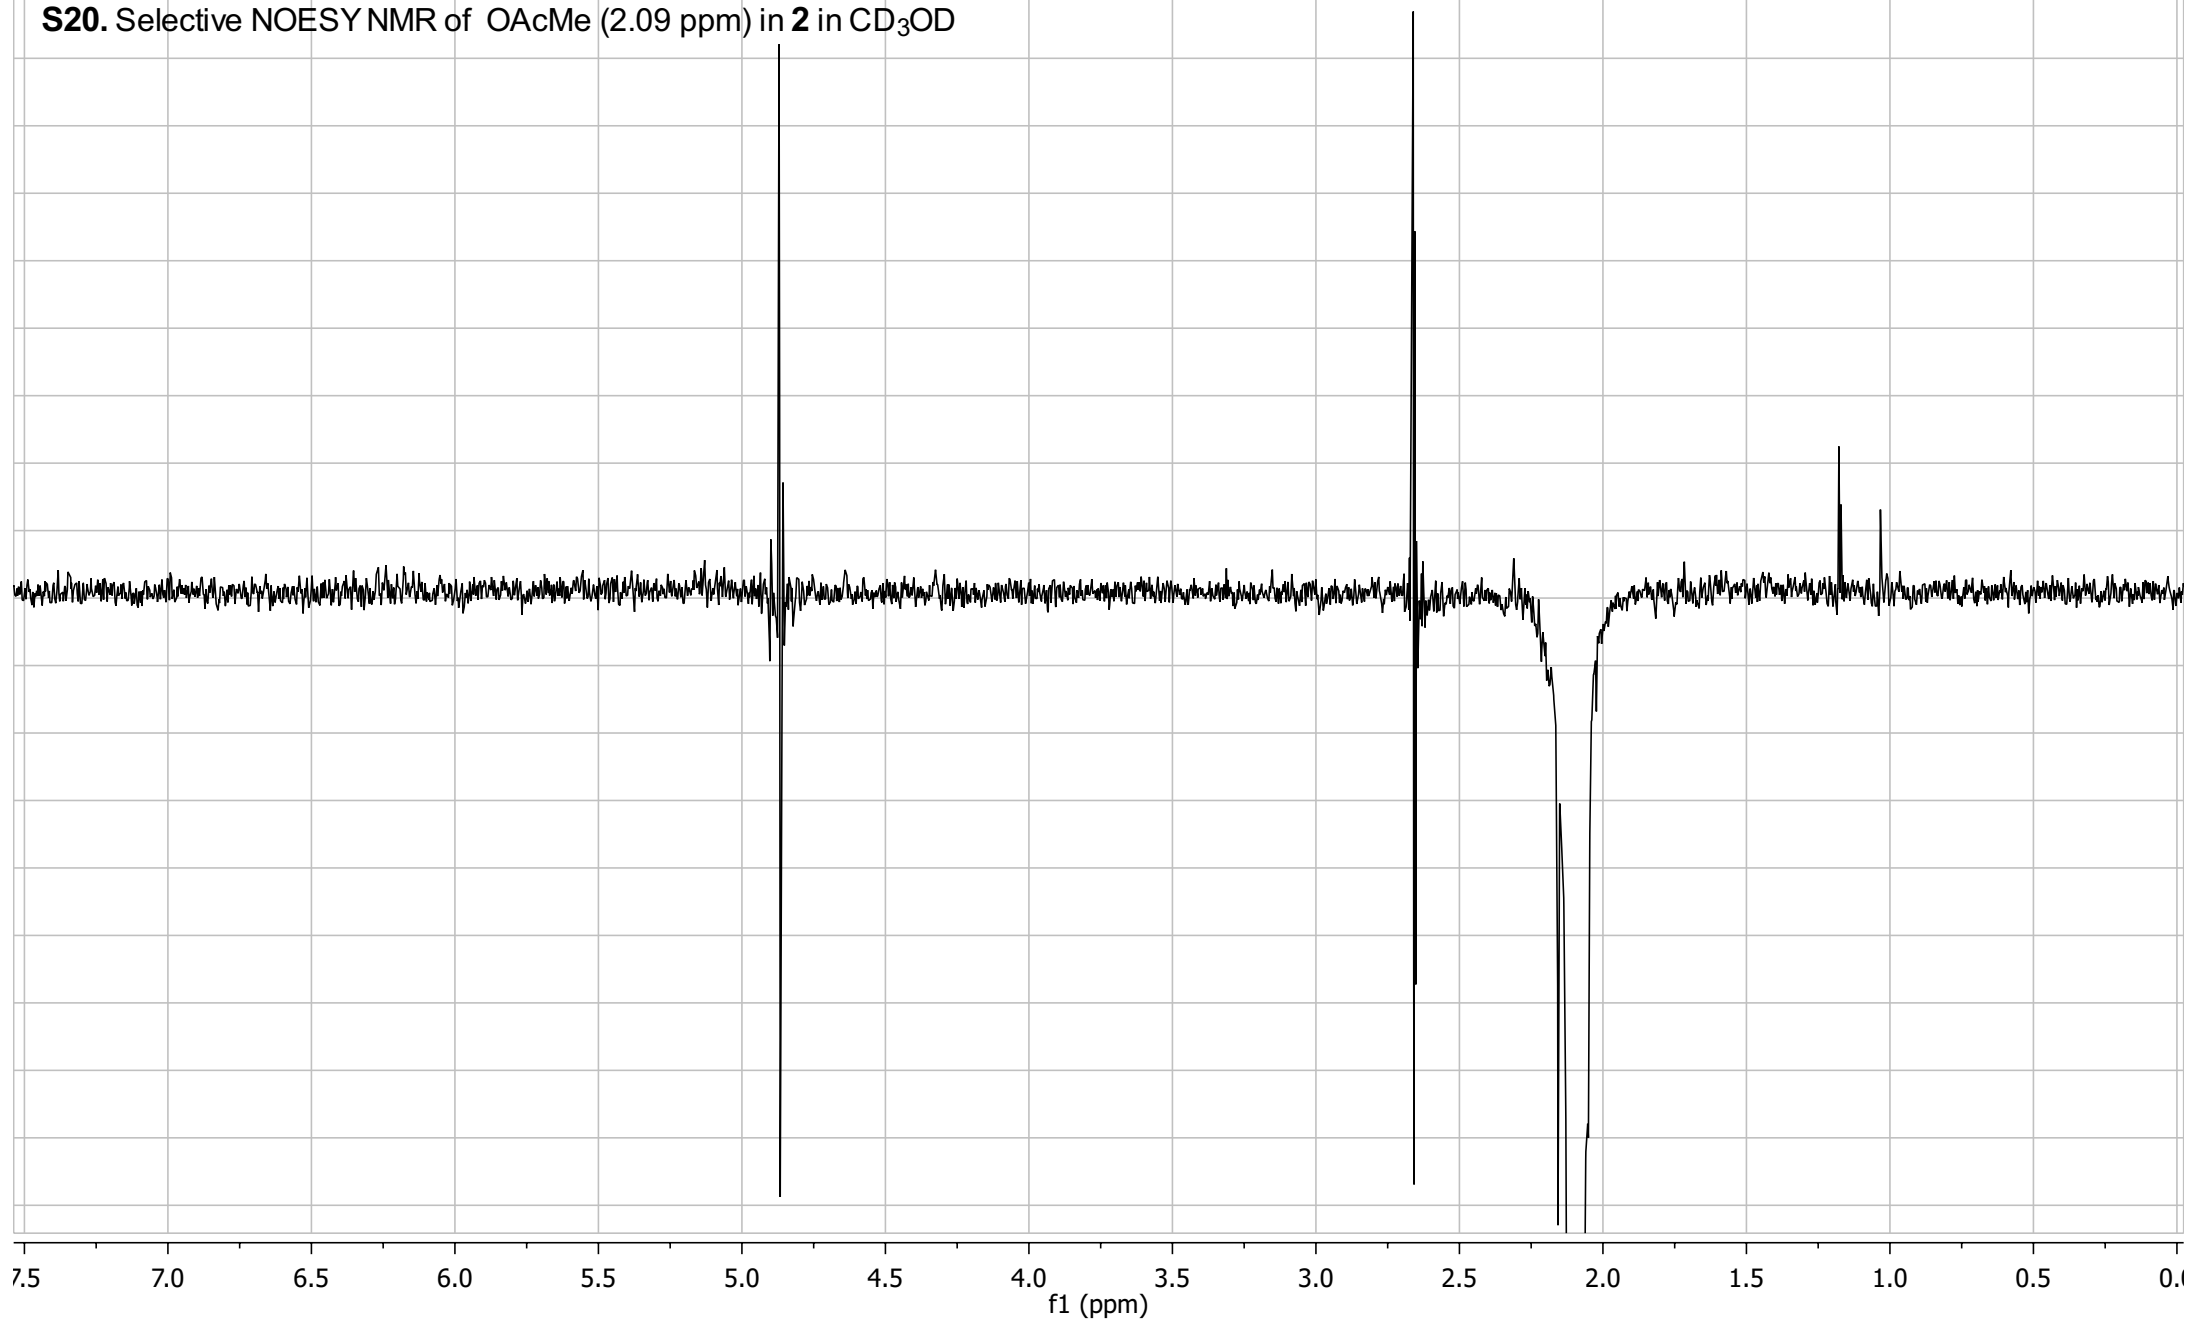



S21. Selective NOESY NMR of H-12 (1.71 ppm) in **2** in CD<sub>3</sub>OD

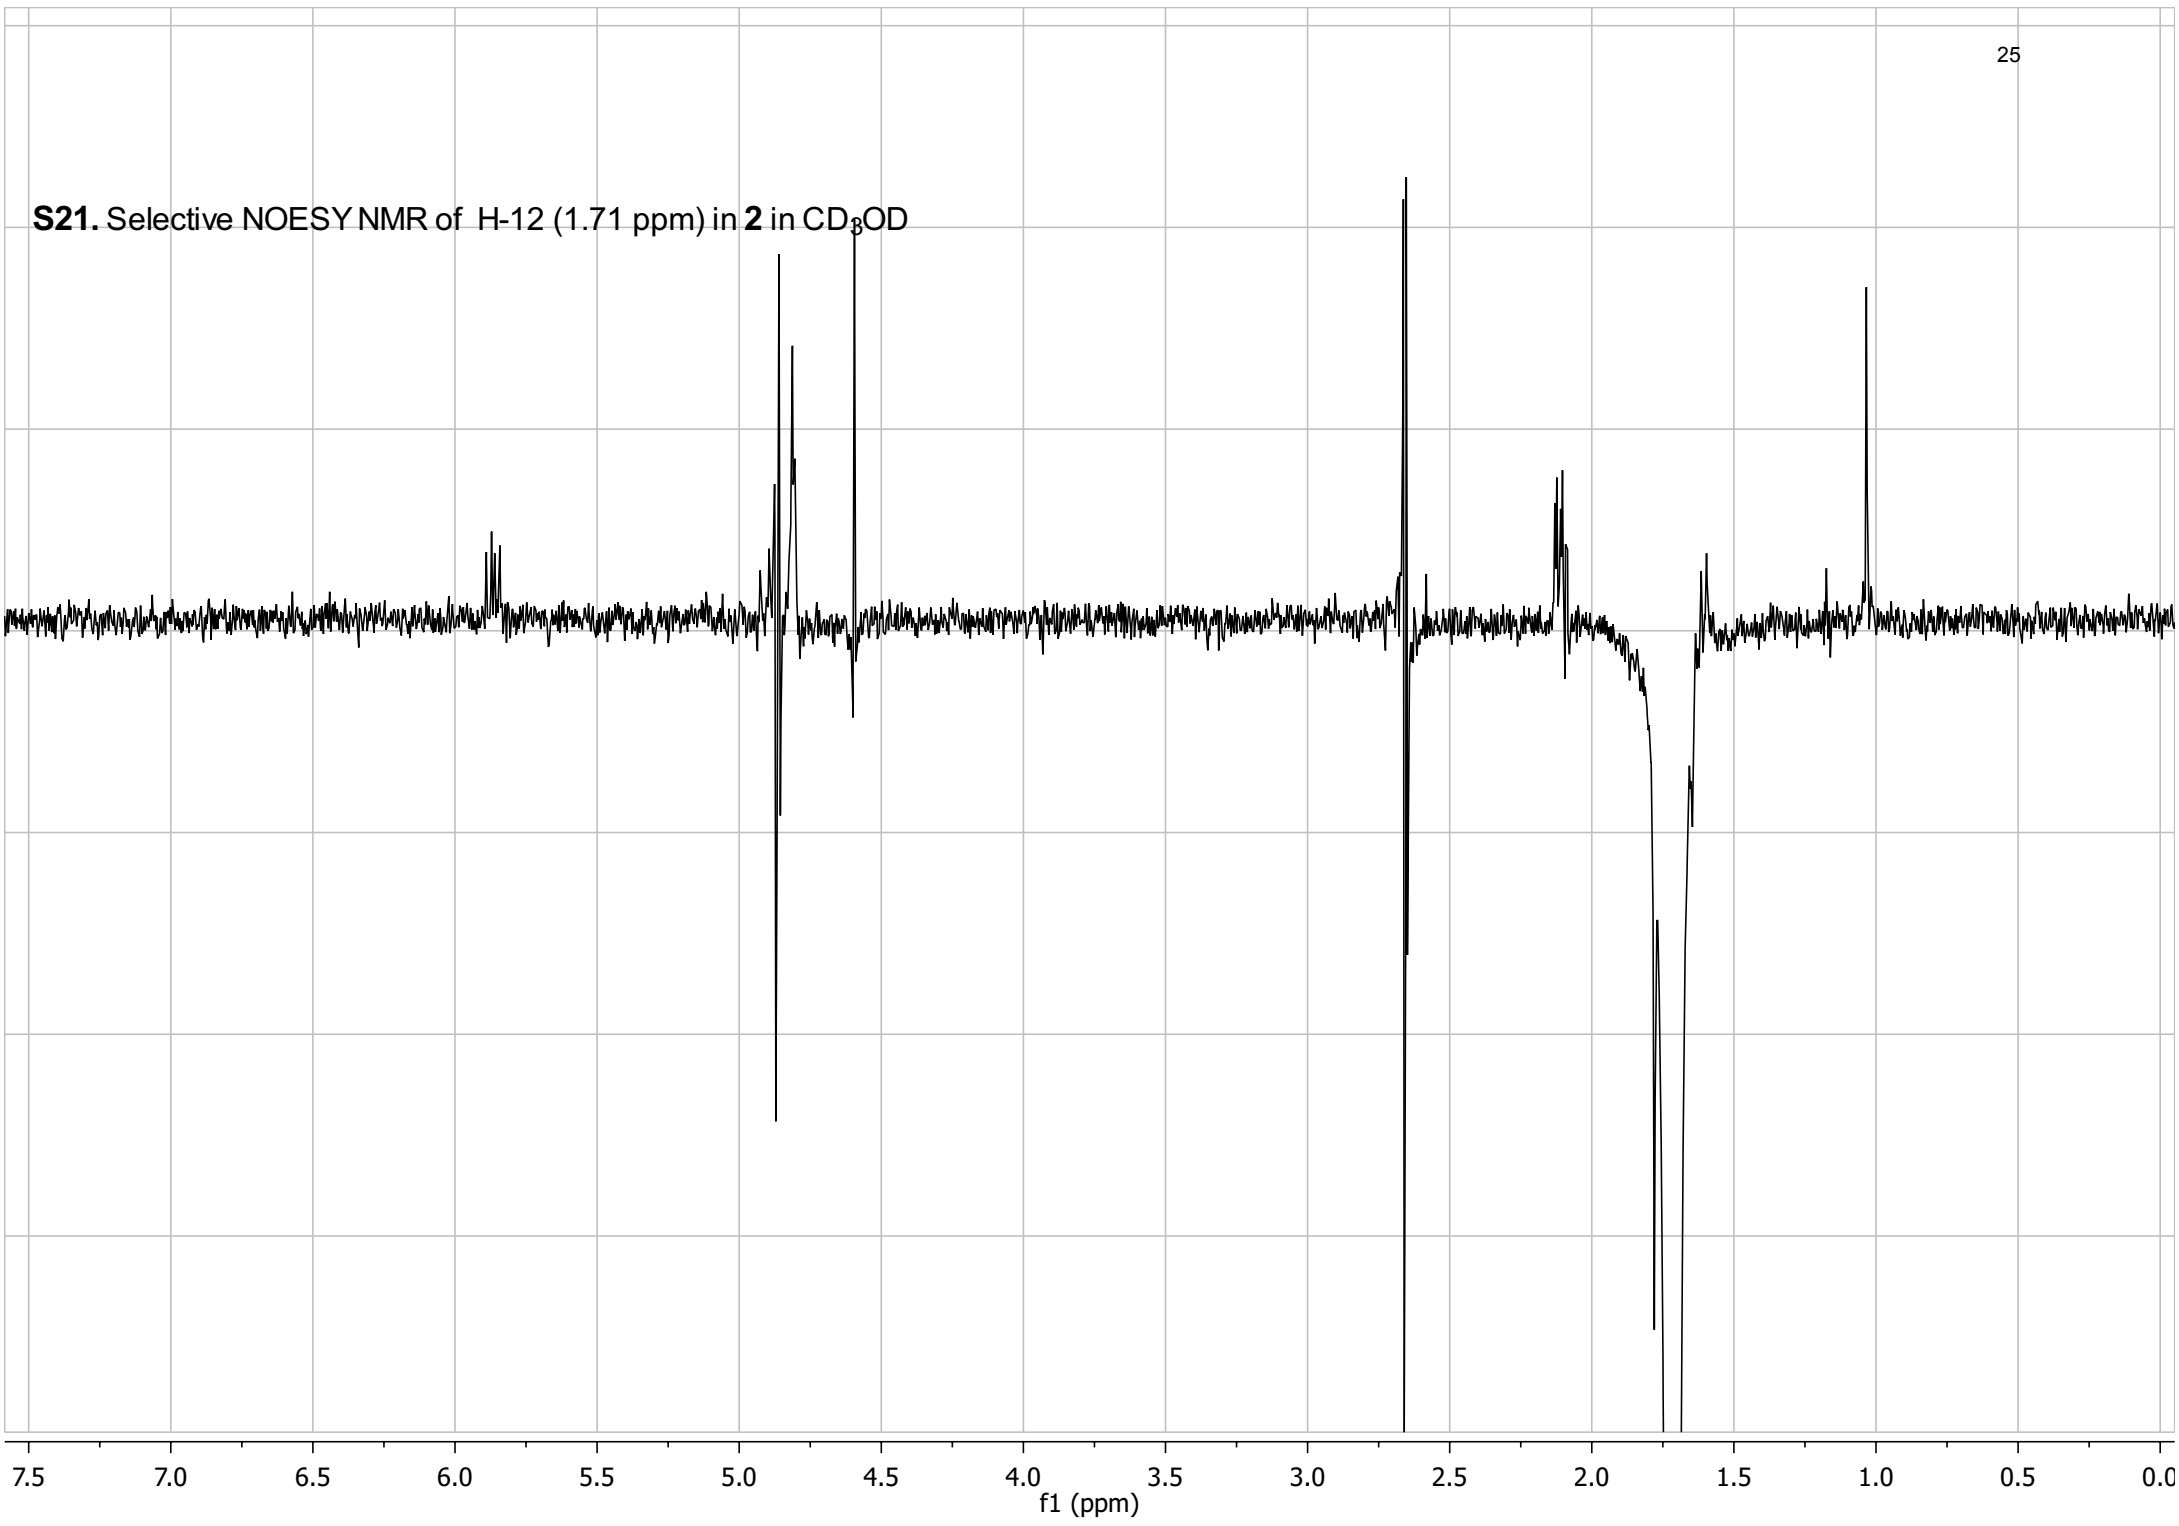

S22. Selective NOESY NMR of H-7 (1.03 ppm) in **2** in CD<sub>3</sub>OD

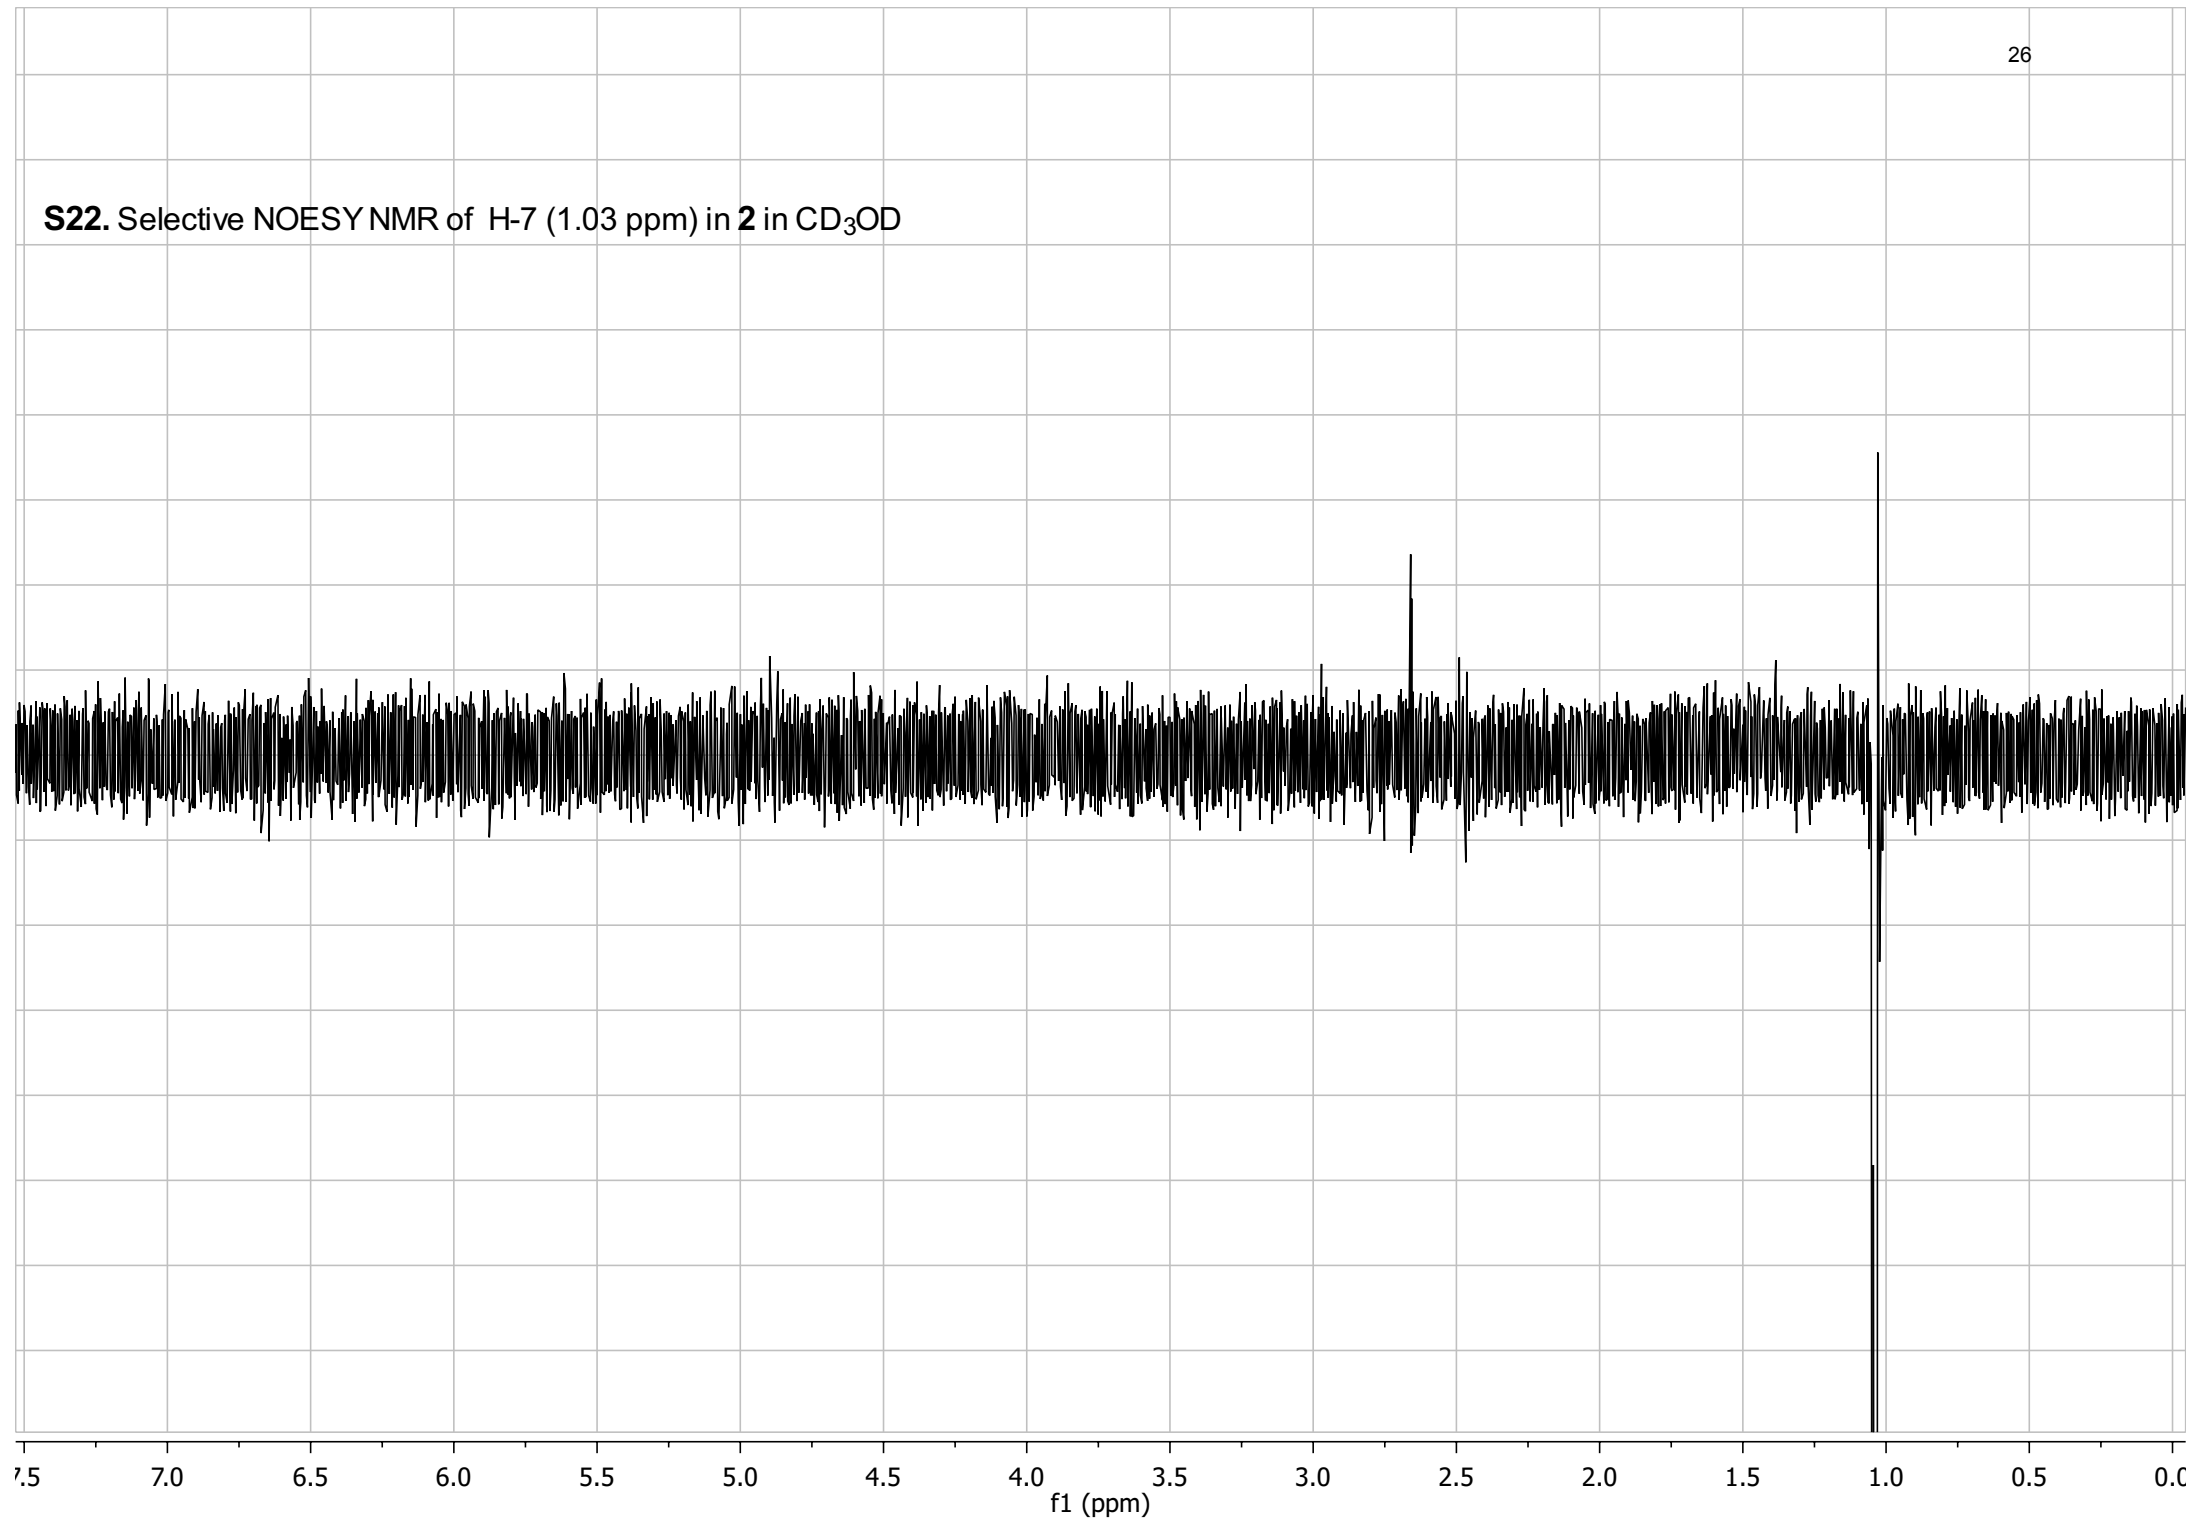

**Scheme 1:** Structures of known compounds isolated from *Sinularia* sp.

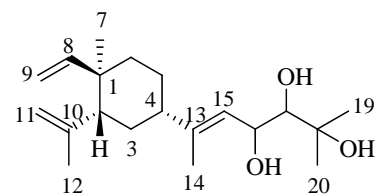

loba-8,10,13(15)-triene-16,17,18-triol<sup>25</sup>

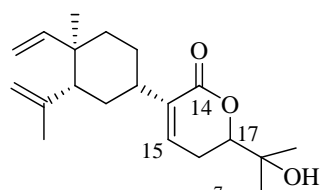

lobatrienolide<sup>7</sup>

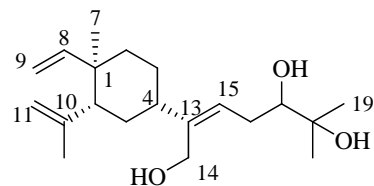

lobatrienetriol<sup>7</sup>

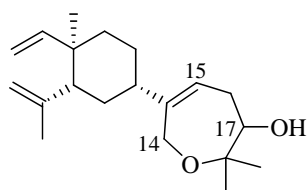

14,18-epoxyloba-8,10,13(15)-trien-17-ol<sup>26</sup>

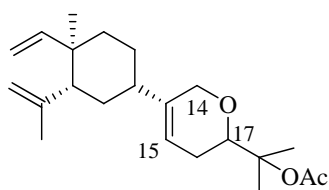

14,17-epoxyloba-8,10,13(15)-trien-18-ol-18-acetate<sup>26</sup>

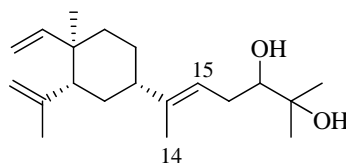

(17*R*)-loba-8,10,13(15)-trien-17,18-diol<sup>27</sup>

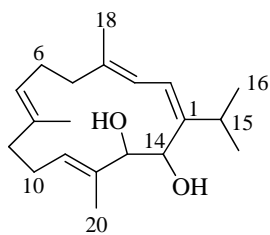

sarcophytol-B<sup>24</sup>

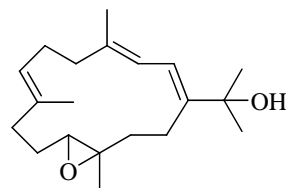

(1*E*,3*E*,7*E*)-11,12-epoxycembratrien-15-ol<sup>8</sup>

S23. <sup>1</sup>H NMR of loba-8,10,13(15)-triene-16,17,18-triol in CD<sub>3</sub>OD

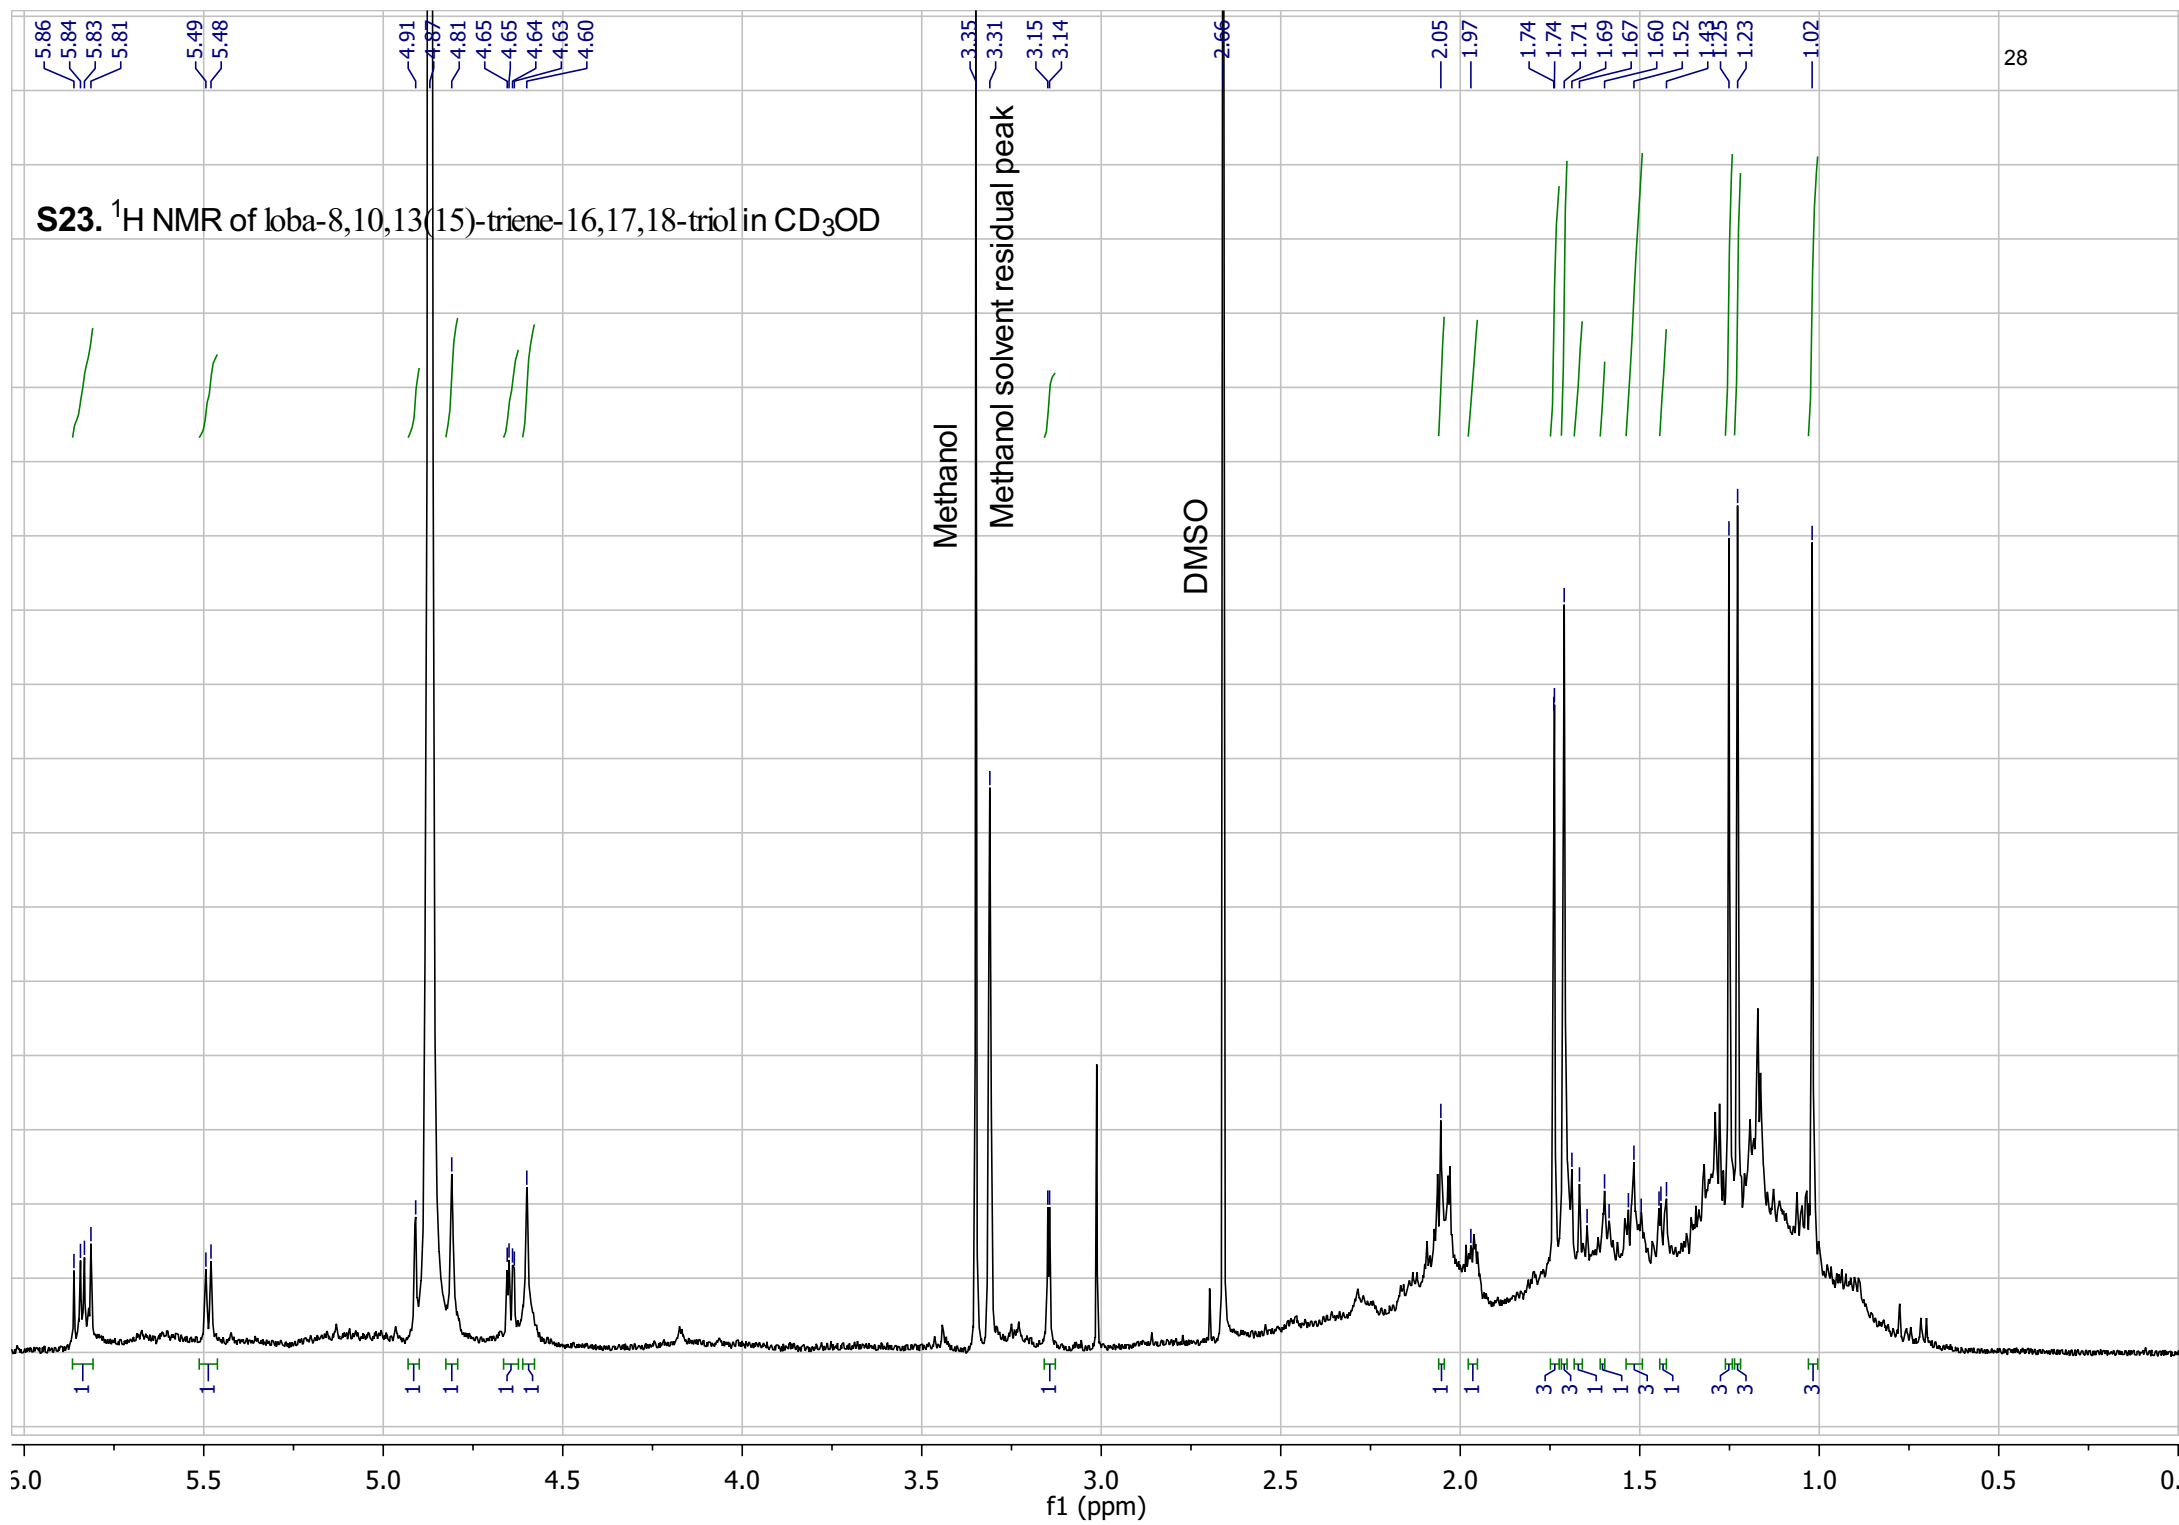

**S24.**  $^{13}\text{C}$  NMR of loba-8,10,13(15)-triene-16,17,18-triol in  $\text{CD}_3\text{OD}$

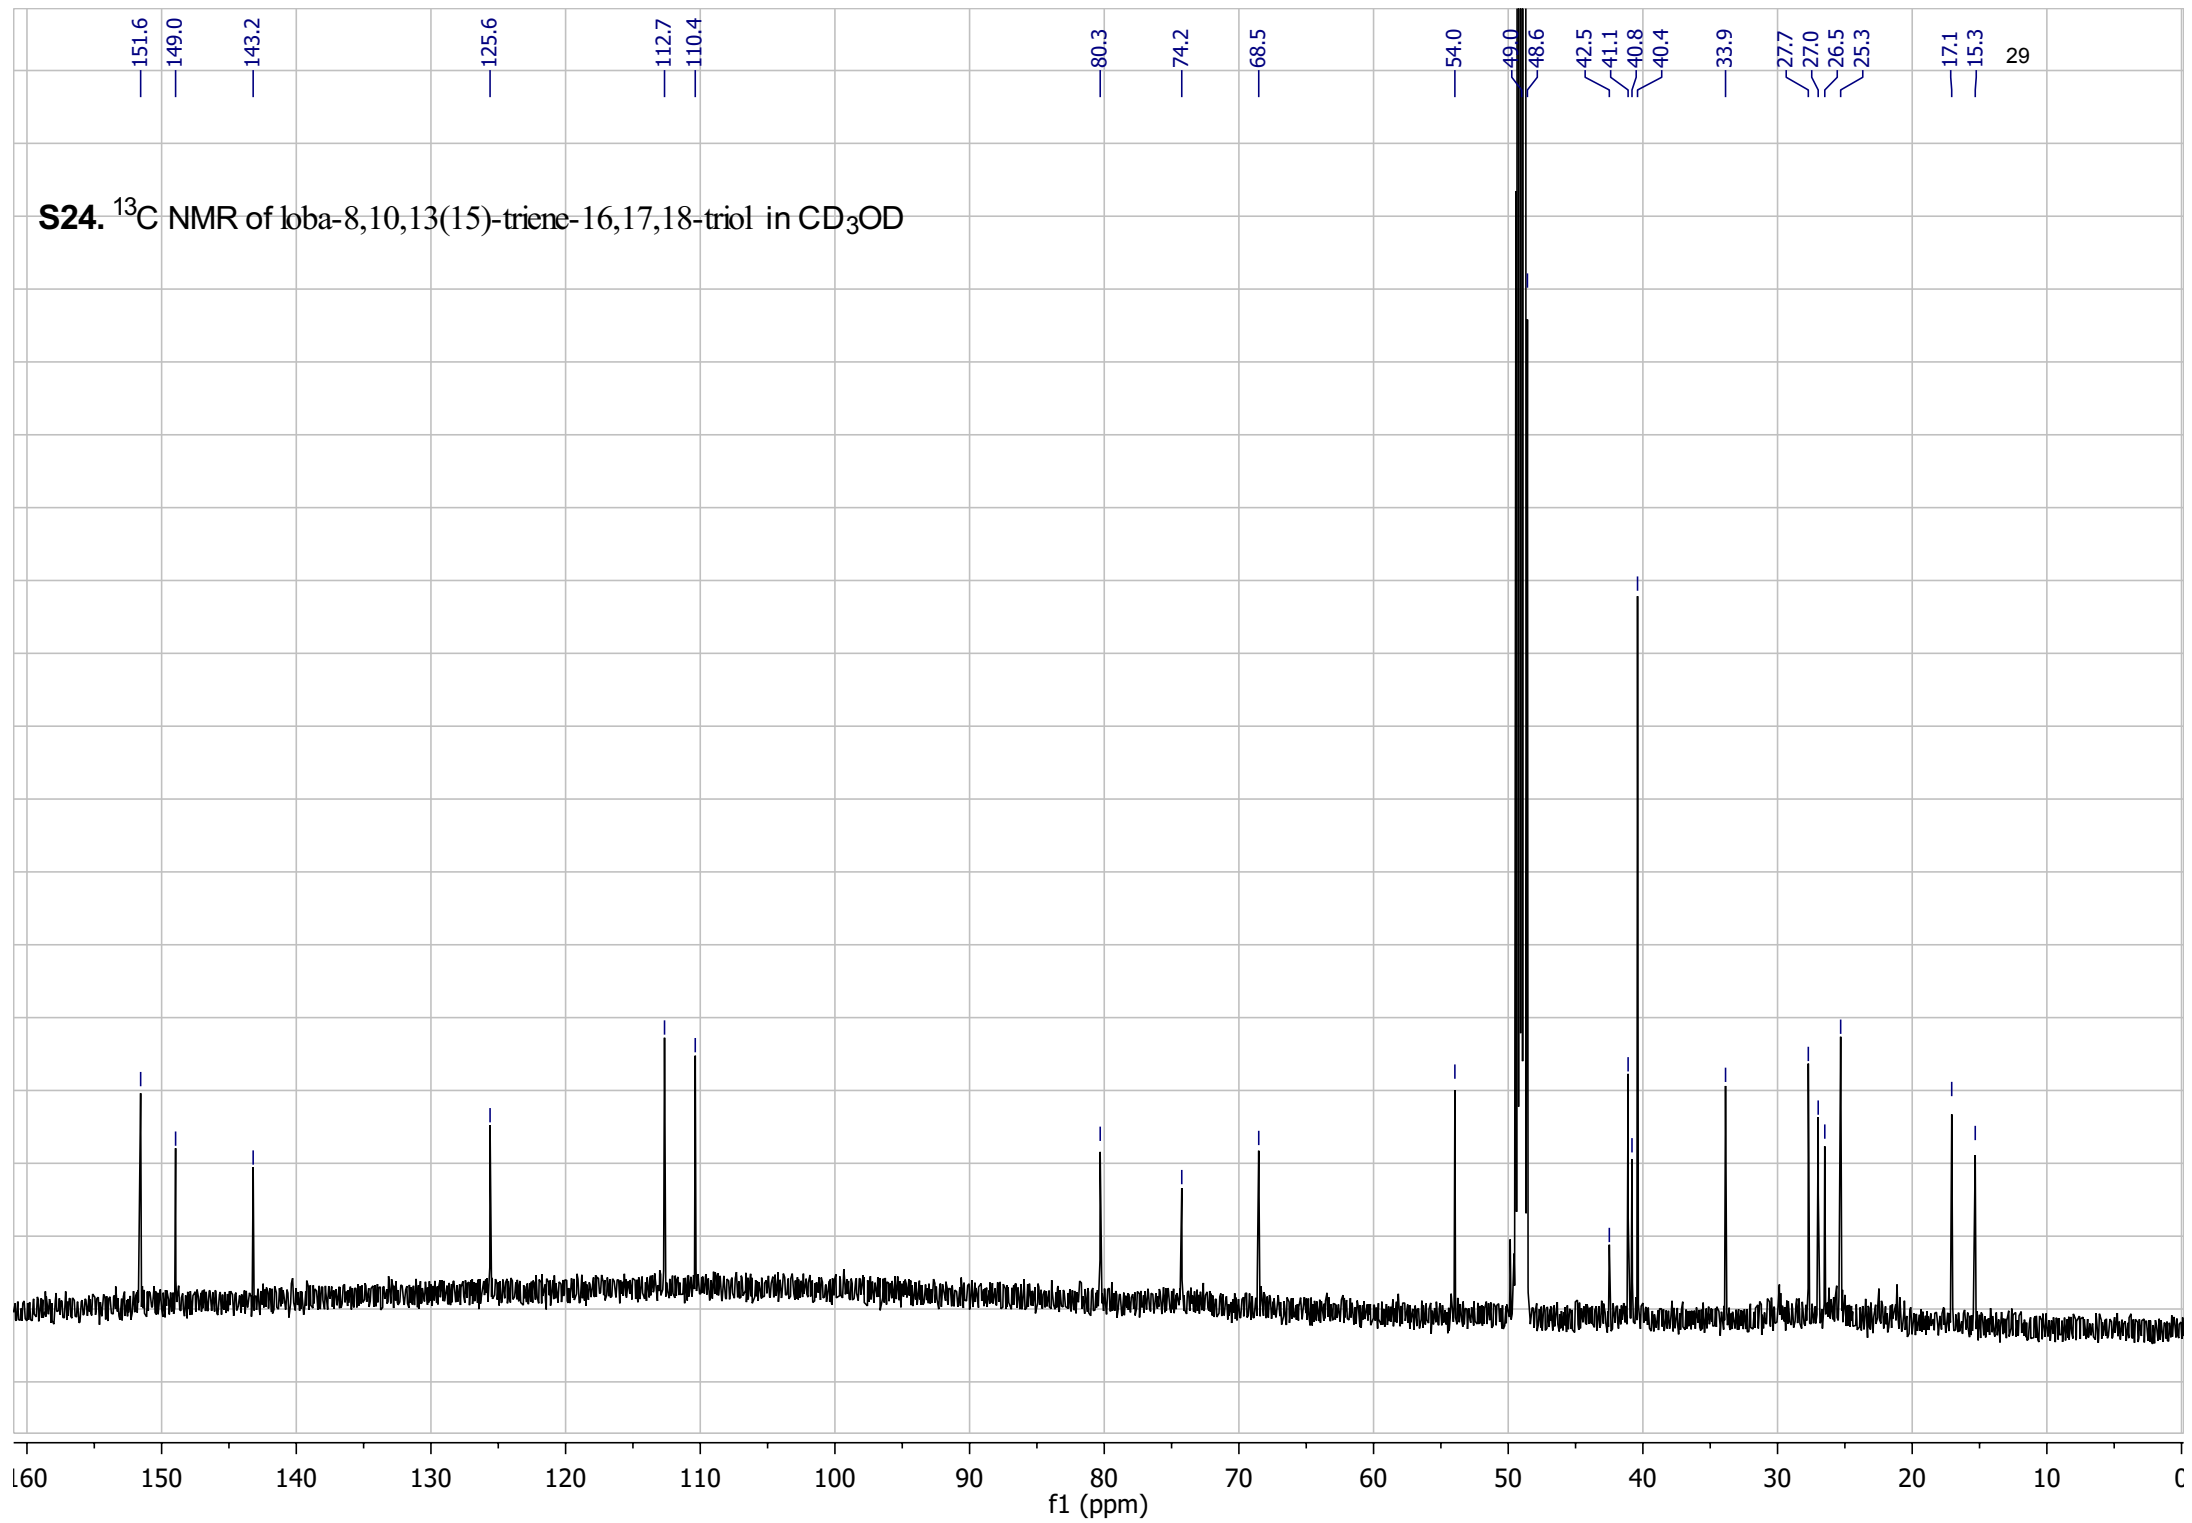

S25. DEPT NMR of loba-8,10,13(15)-triene-16,17,18-triol in CD<sub>3</sub>OD

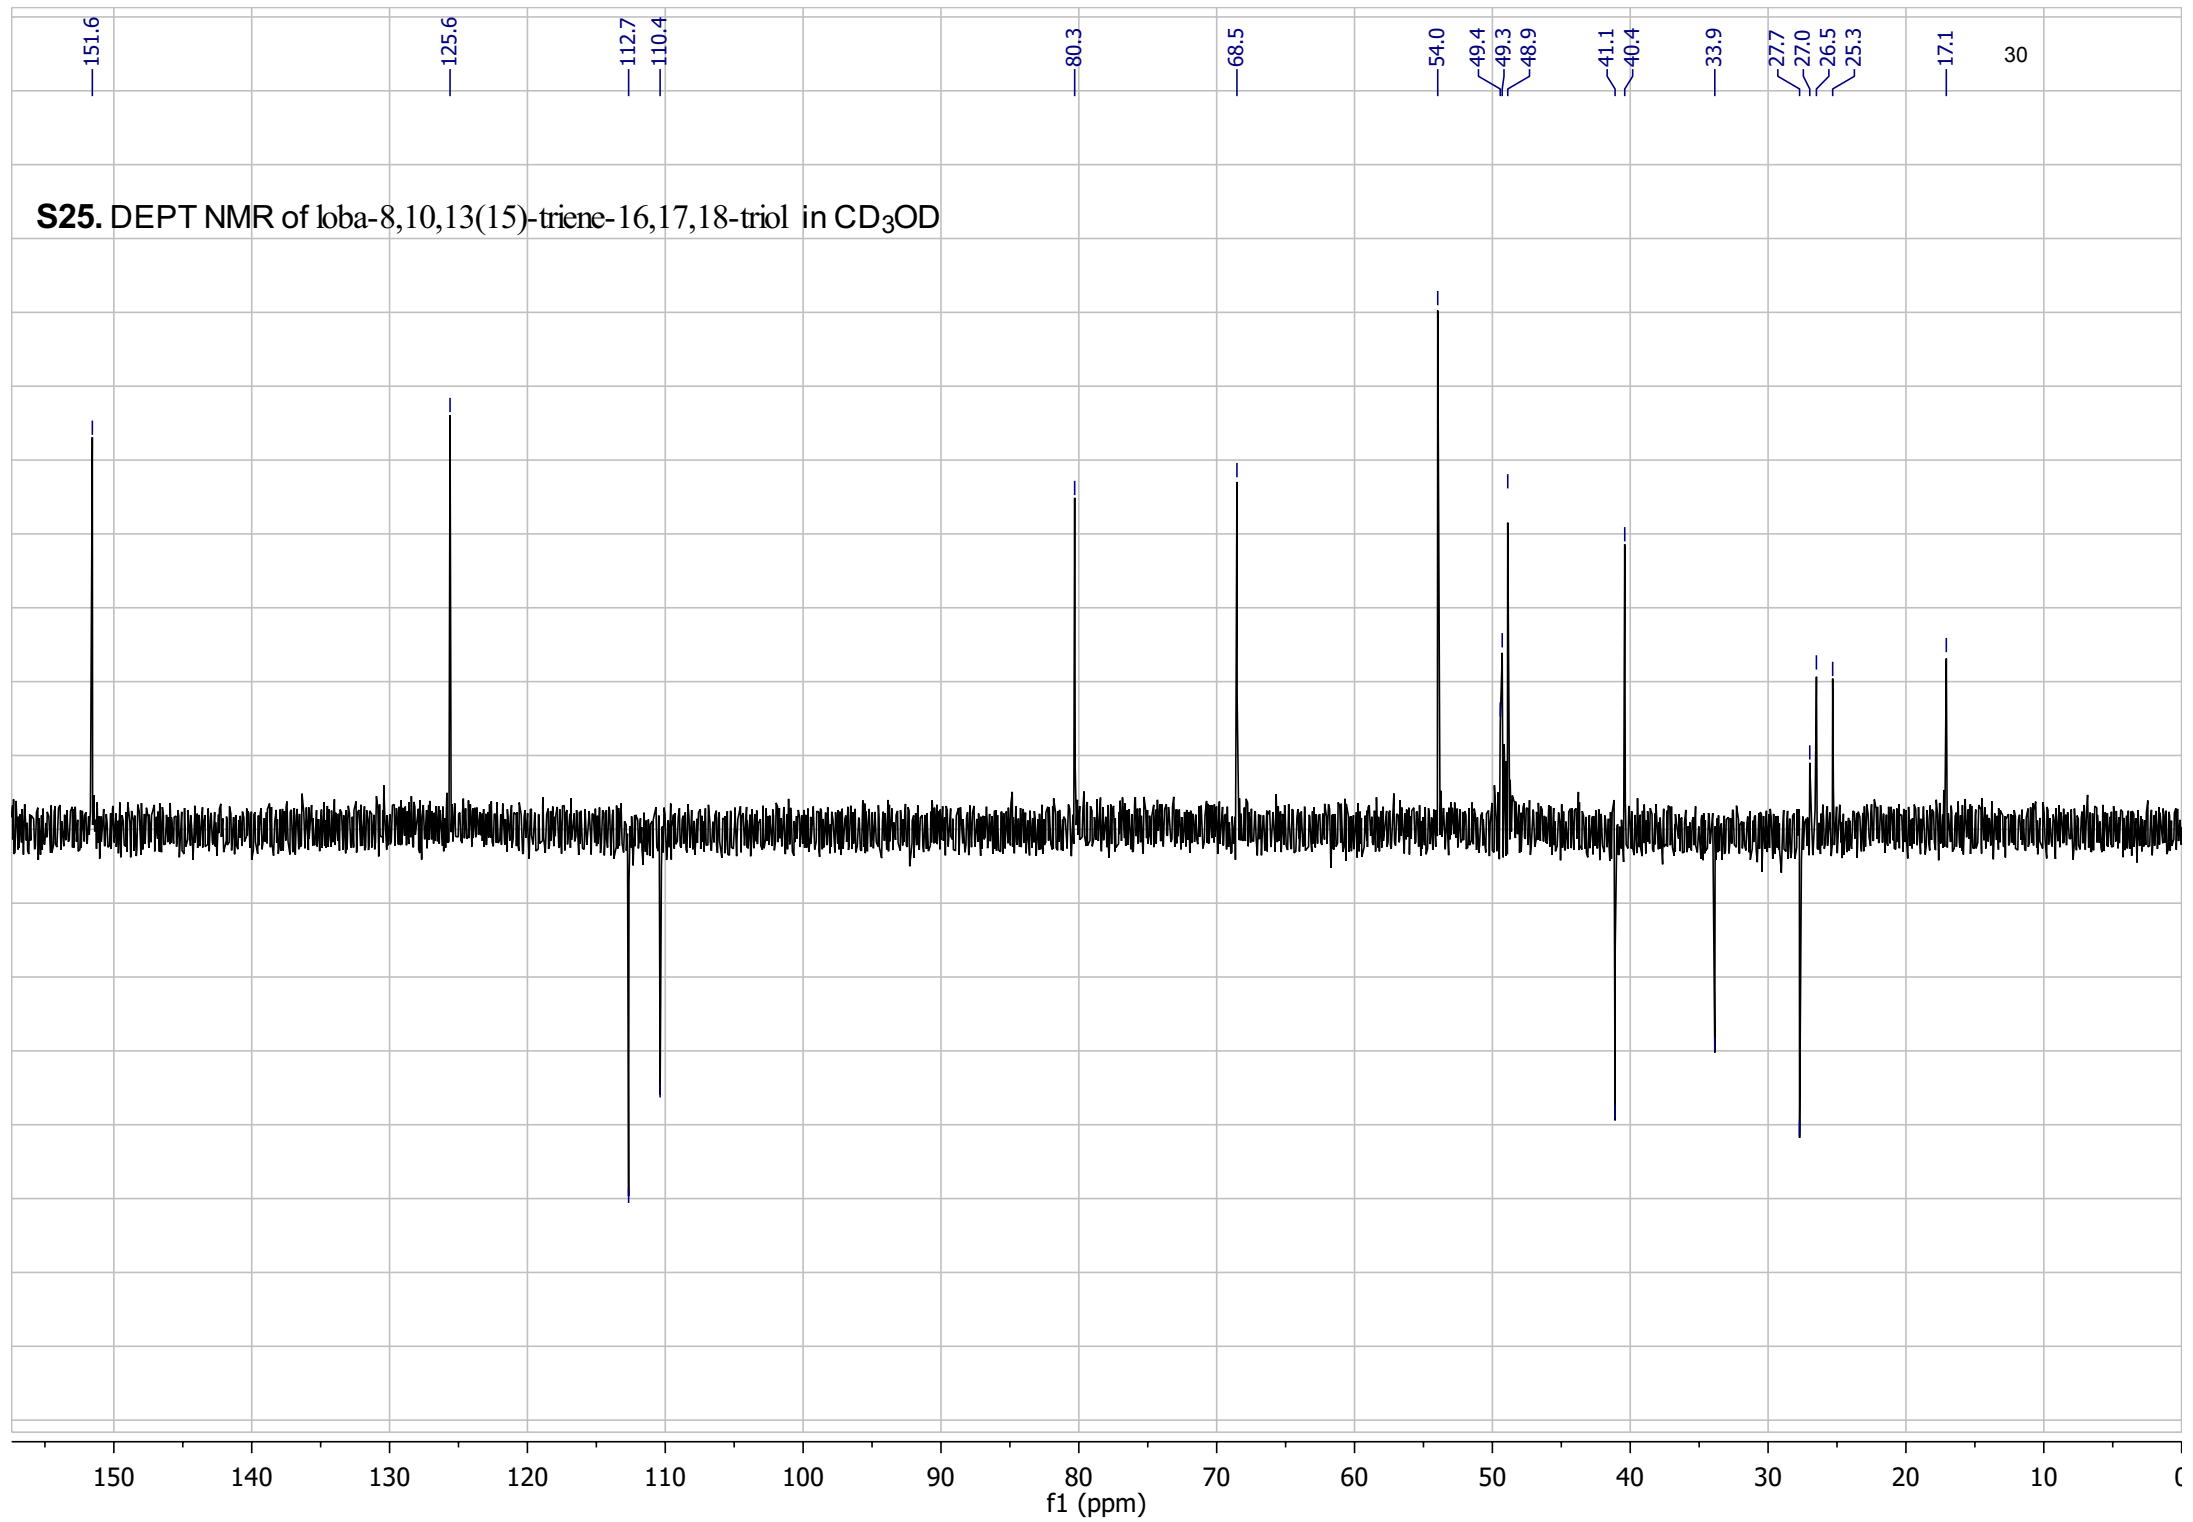

S26. COSY NMR of loba-8,10,13(15)-triene-16,17,18-triol in CD<sub>3</sub>OD

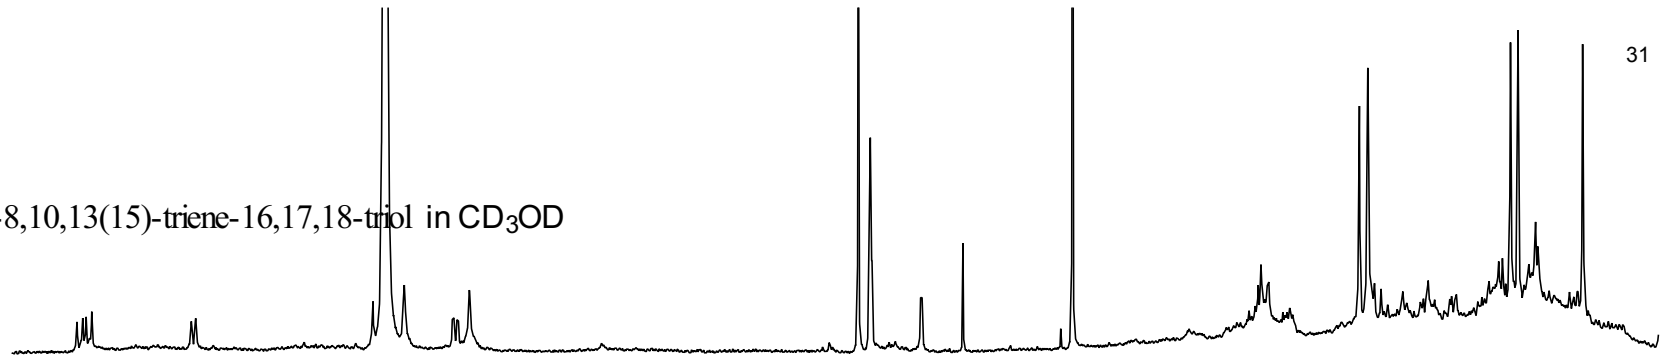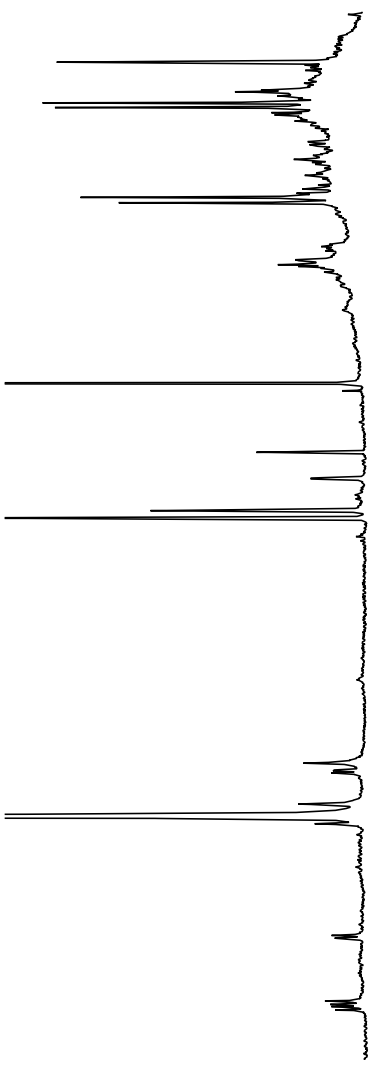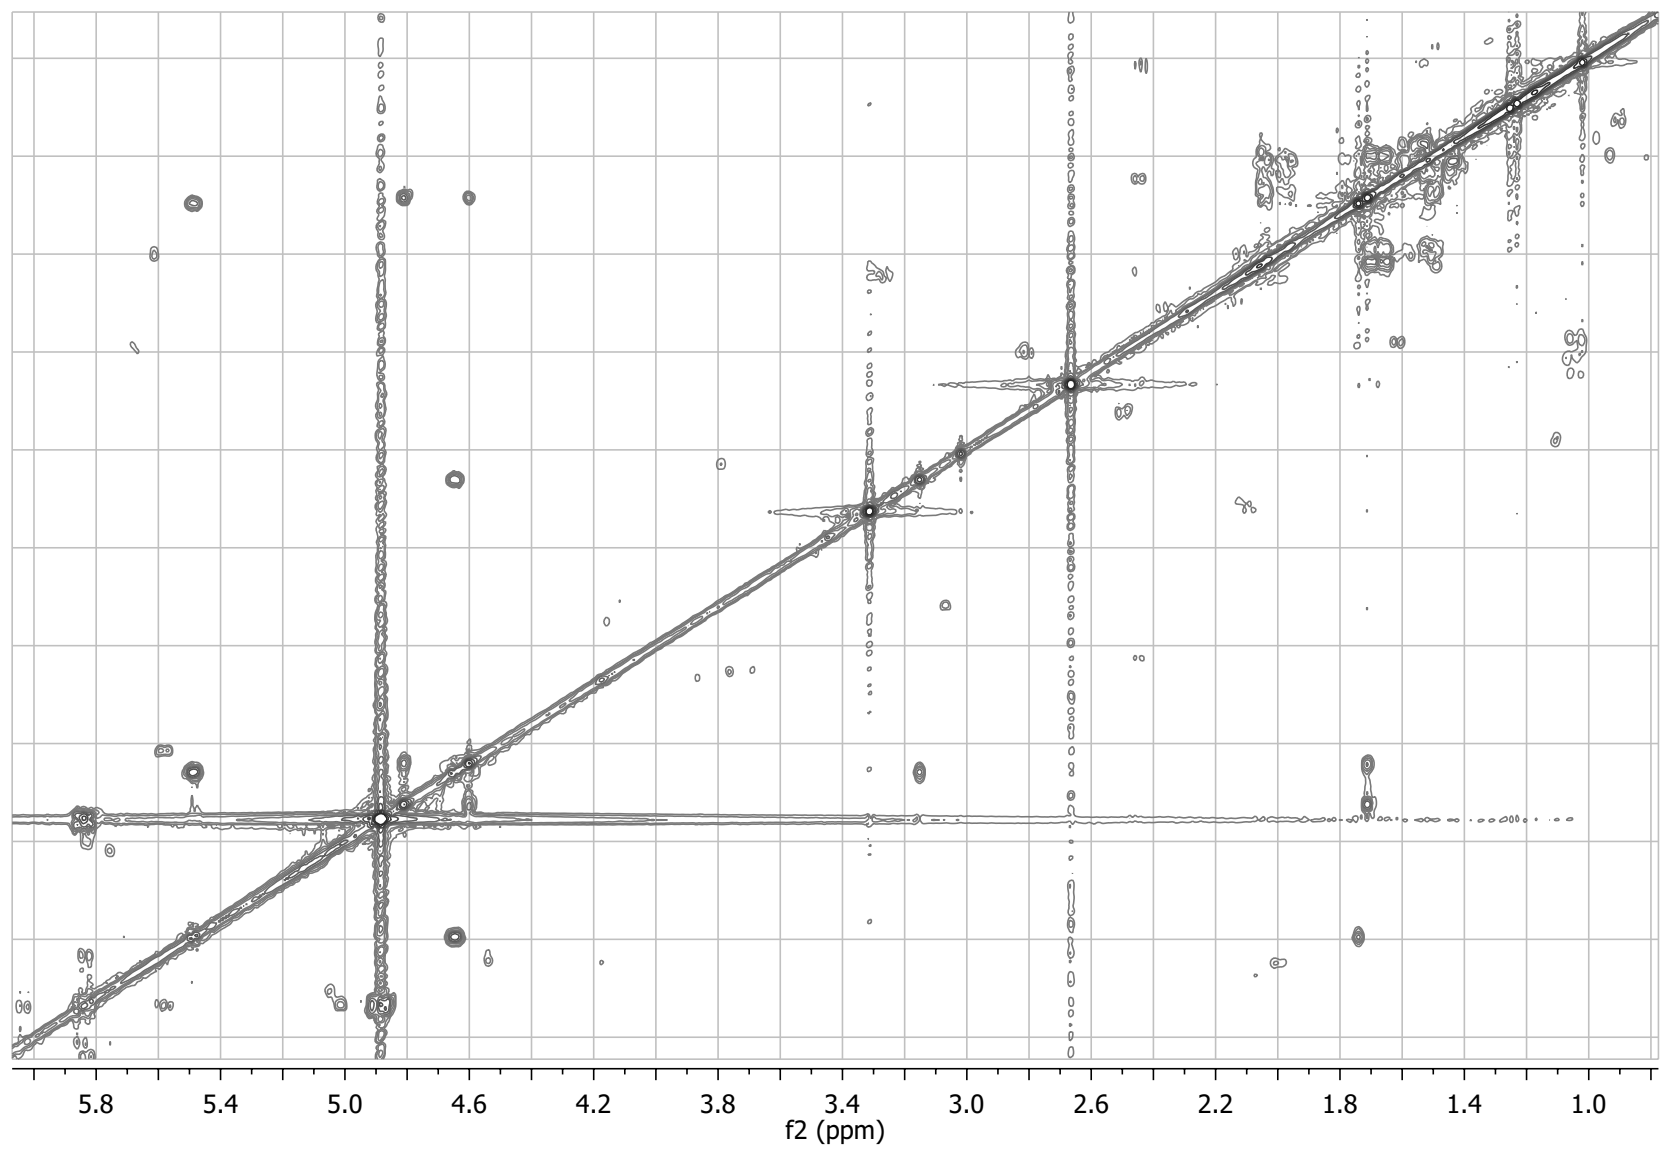

f1 (ppm)

f2 (ppm)

S27. HSQC NMR of loba-8,10,13(15)-triene-16,17,18-triol in CD<sub>3</sub>OD

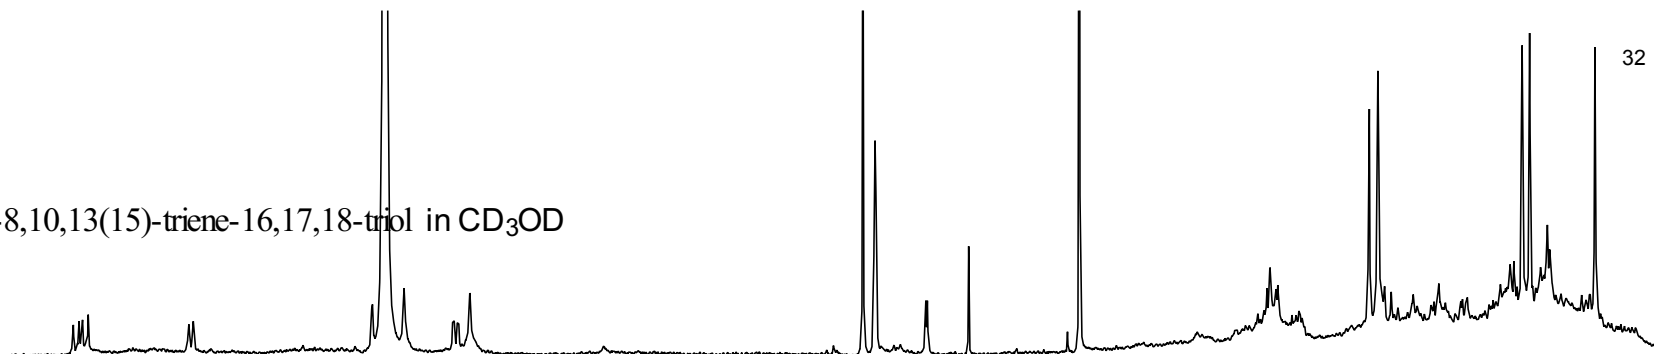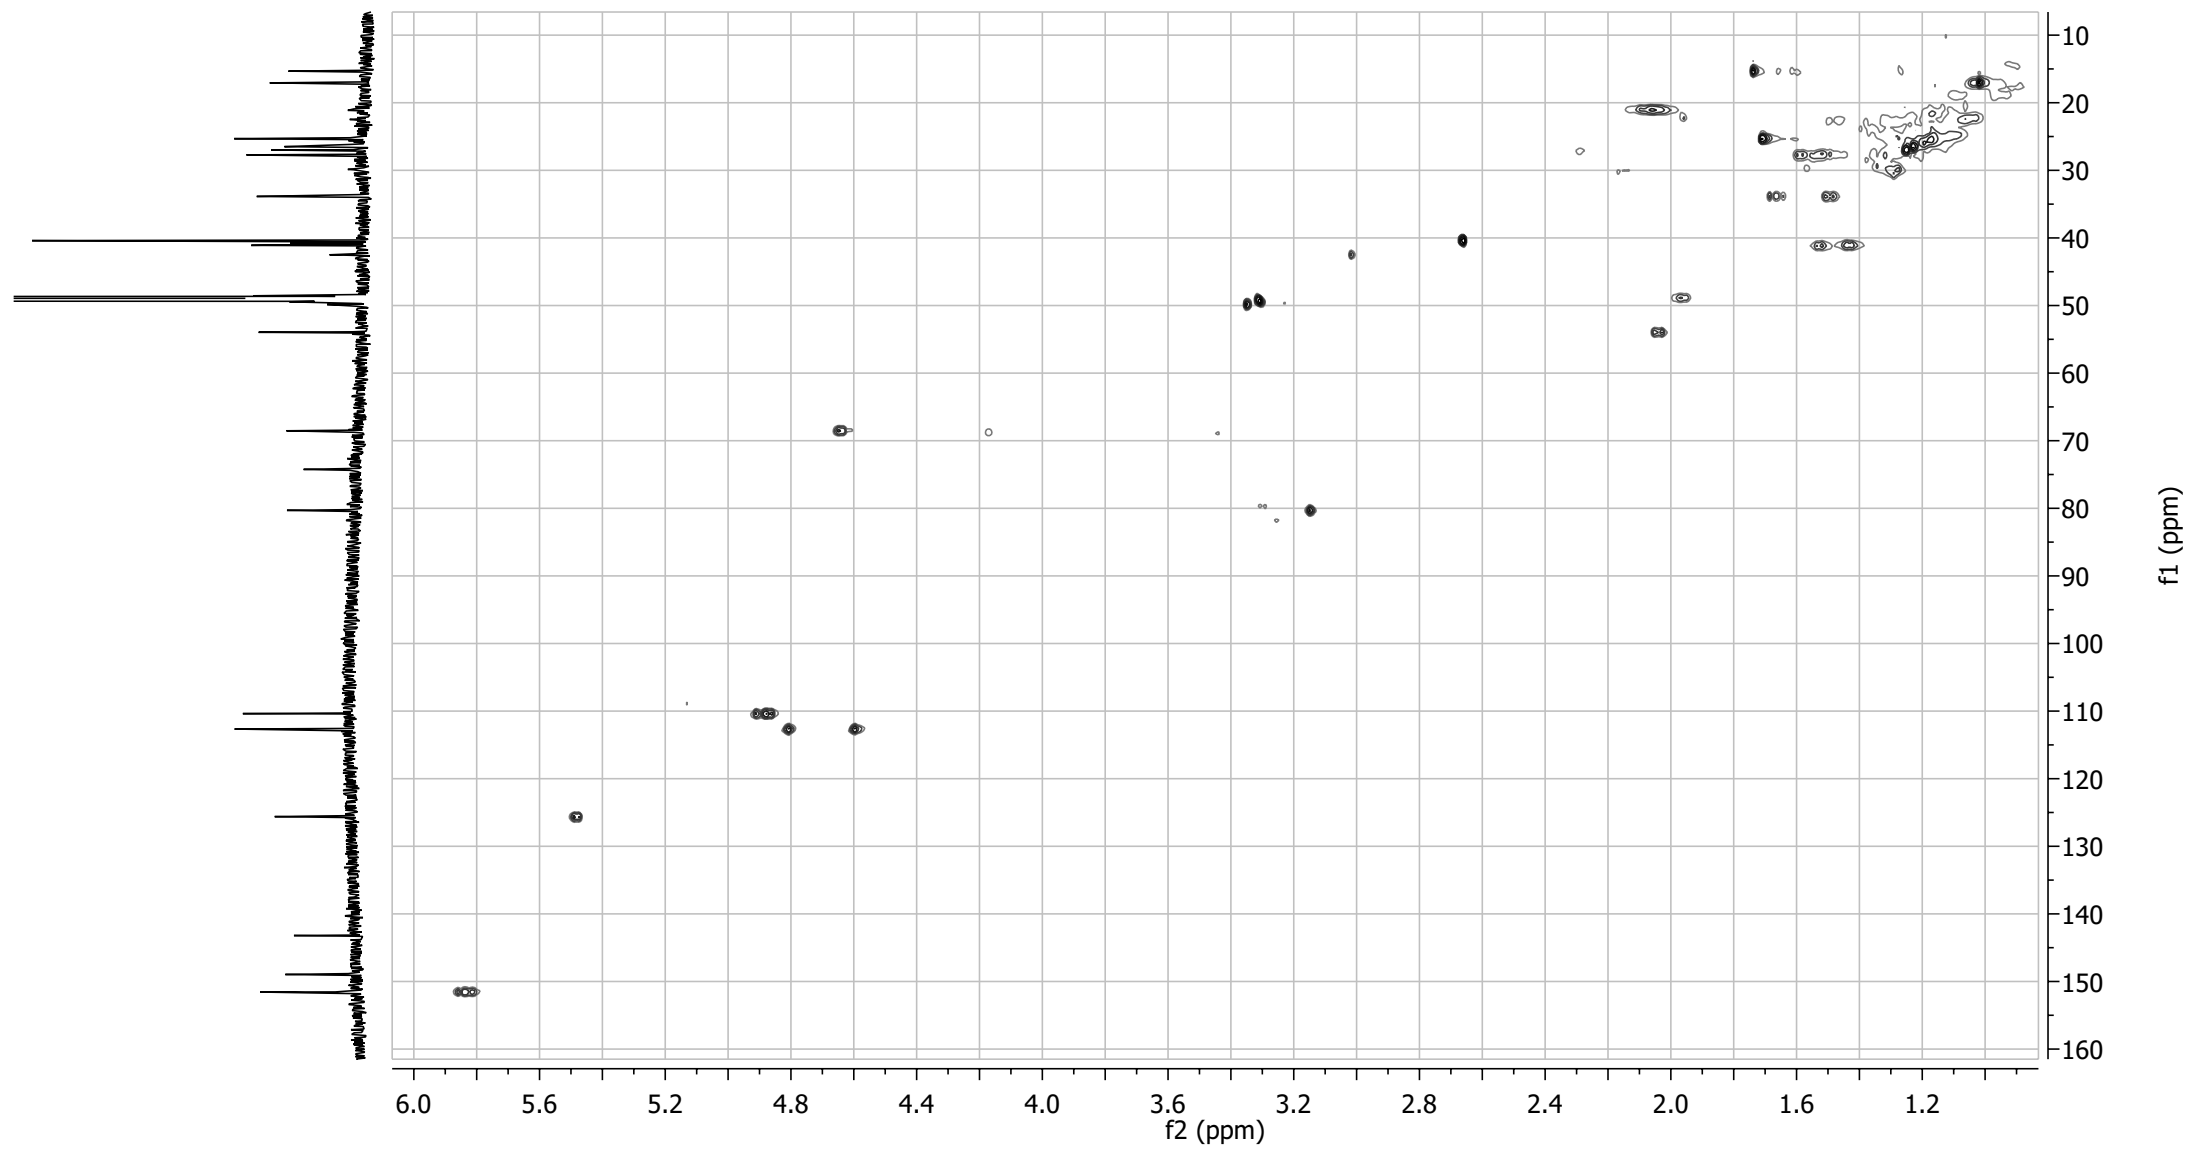



S28. HMBC NMR of loba-8,10,13(15)-triene-16,17,18-triol in CD<sub>3</sub>OD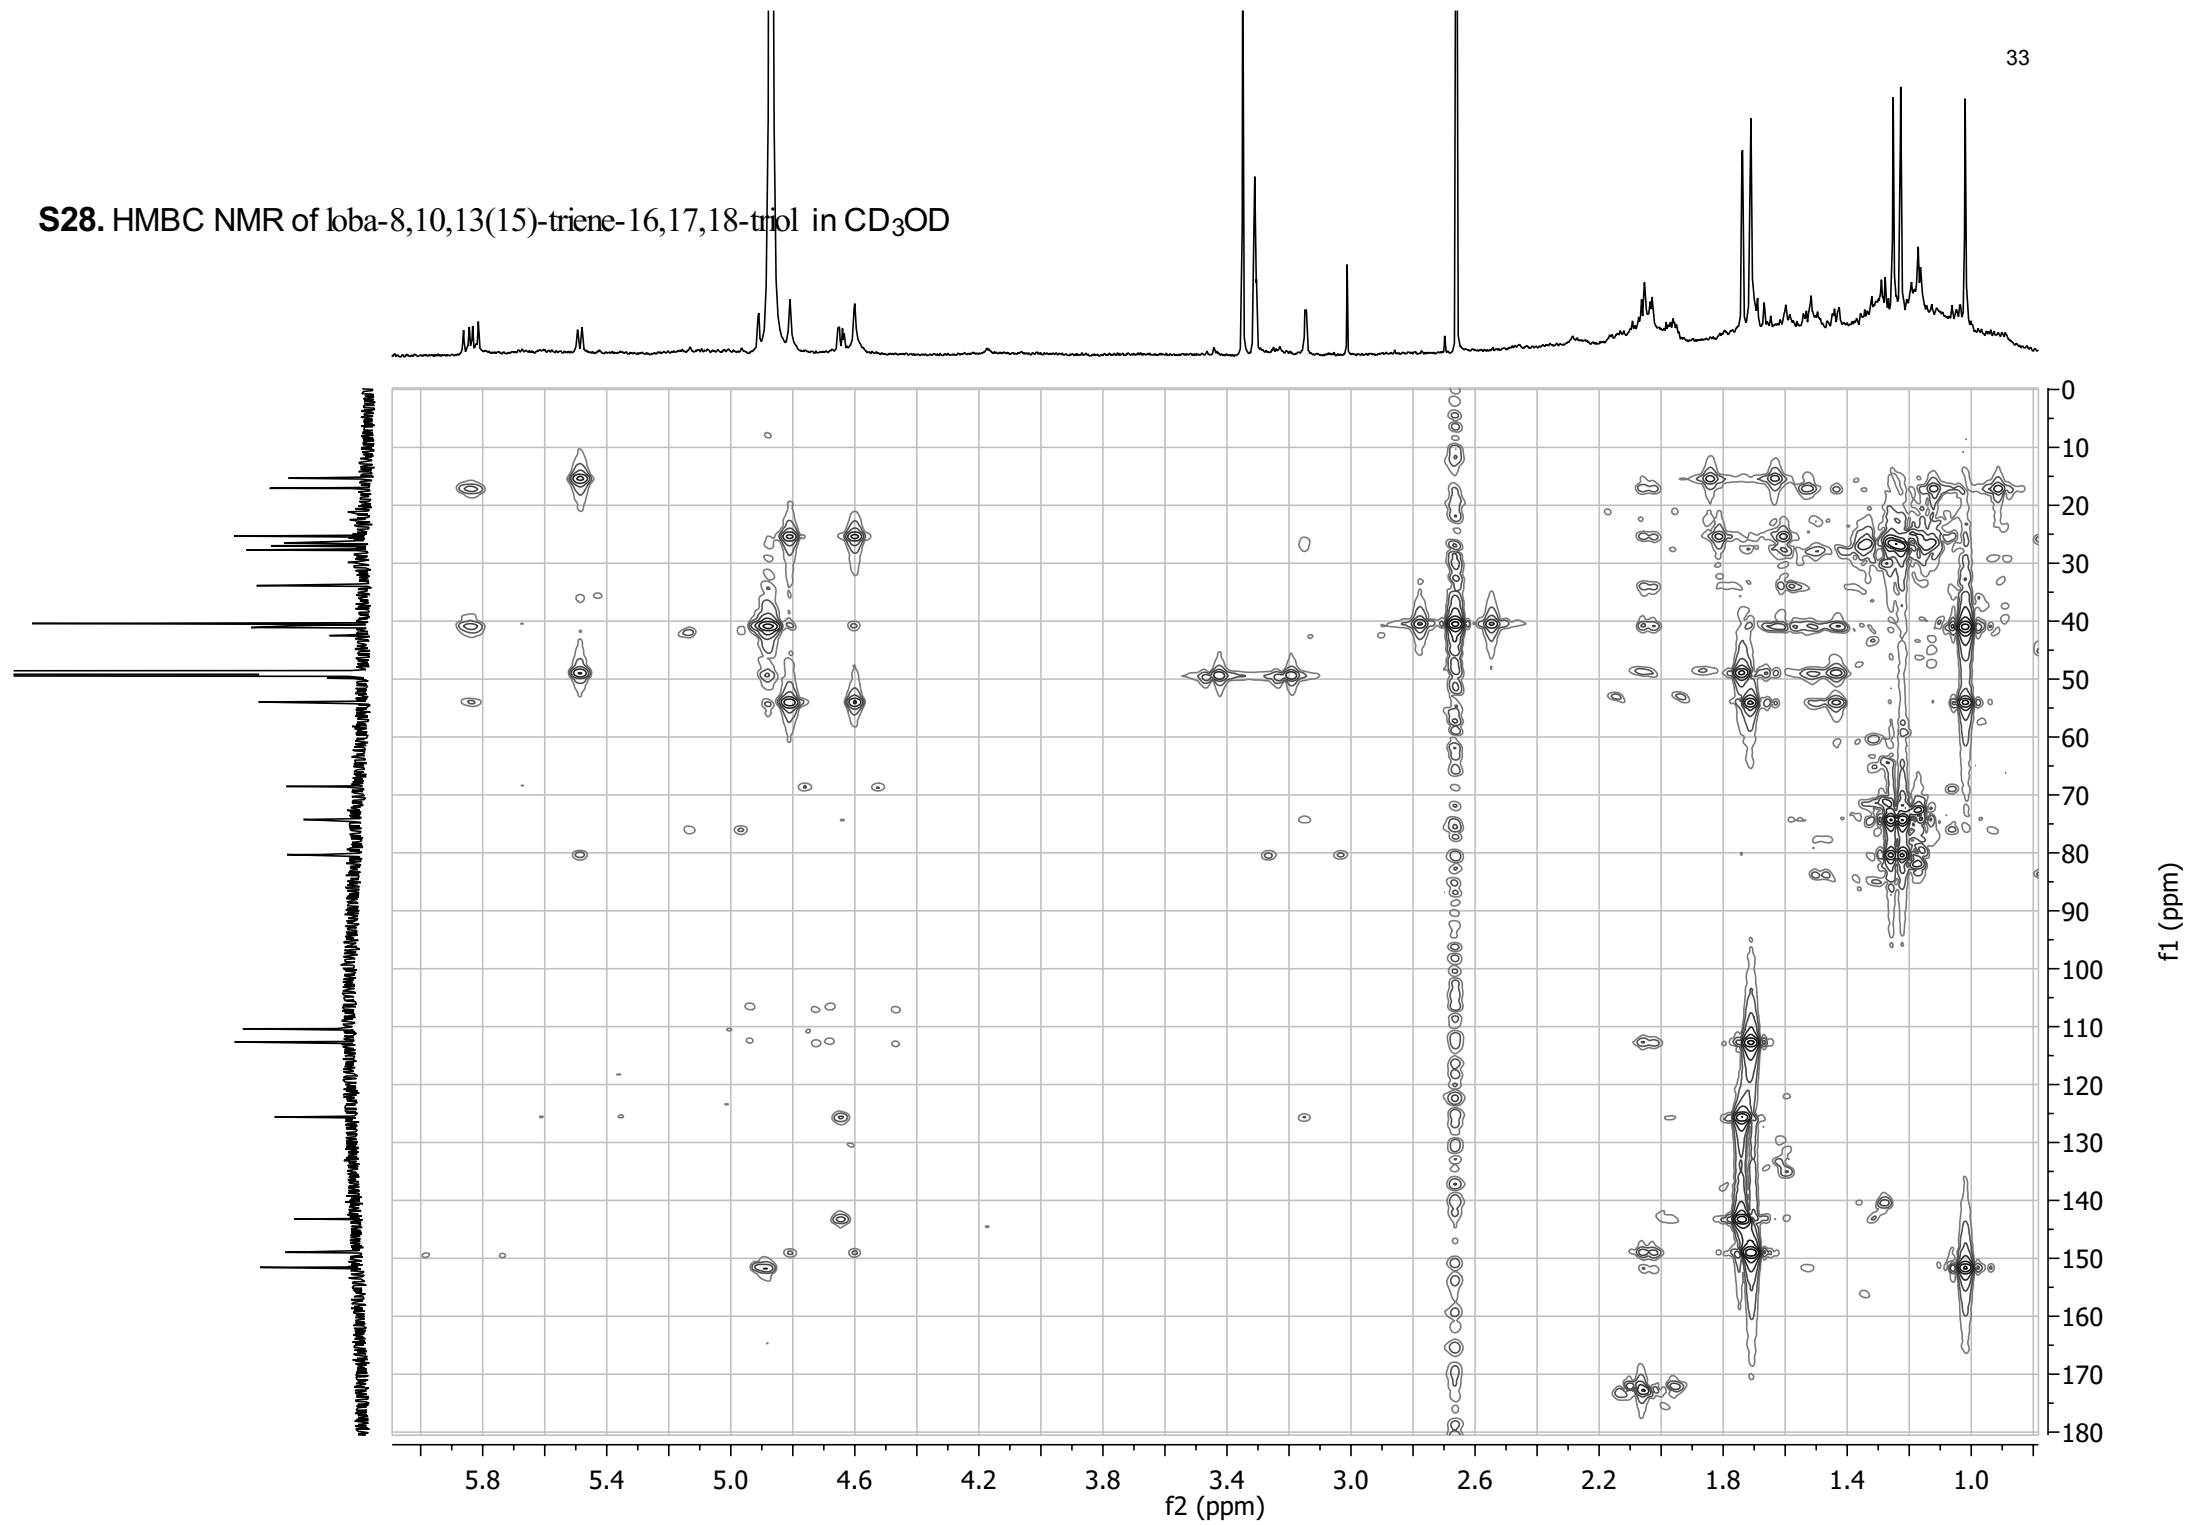

**S29.** Selective NOESY NMR of H-16 (4.65 ppm) in loba-8,10,13(15)-triene-16,17,18-triol in CD<sub>3</sub>OD

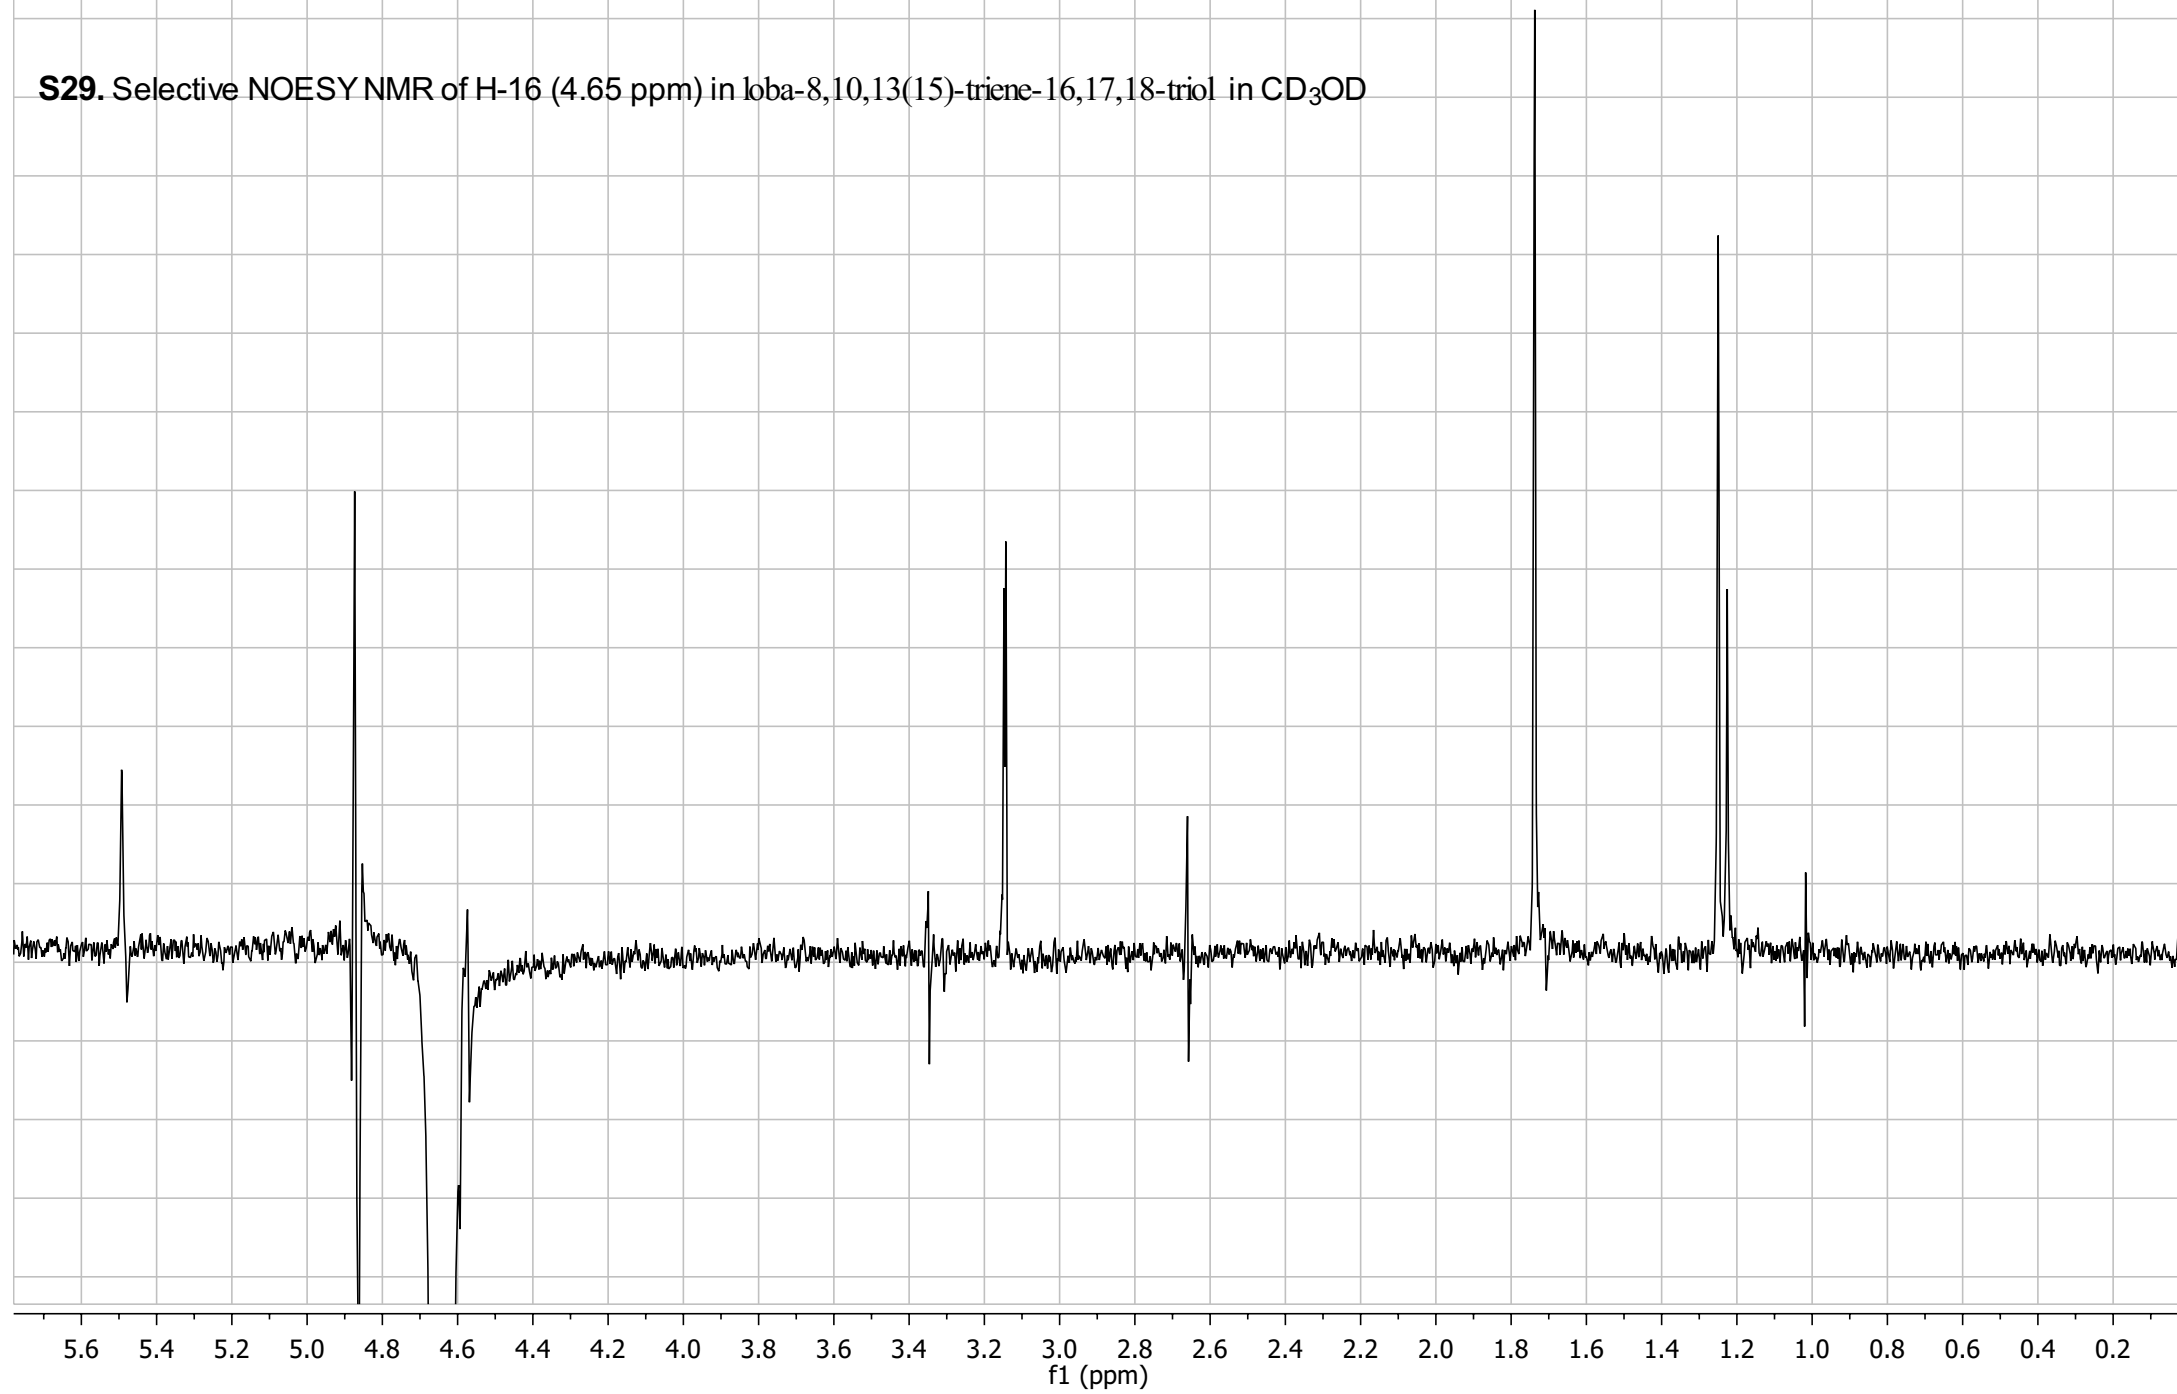

**S30.** Selective NOESY NMR of H-17 (3.15 ppm) in loba-8,10,13(15)-triene-16,17,18-triol in CD<sub>3</sub>OD

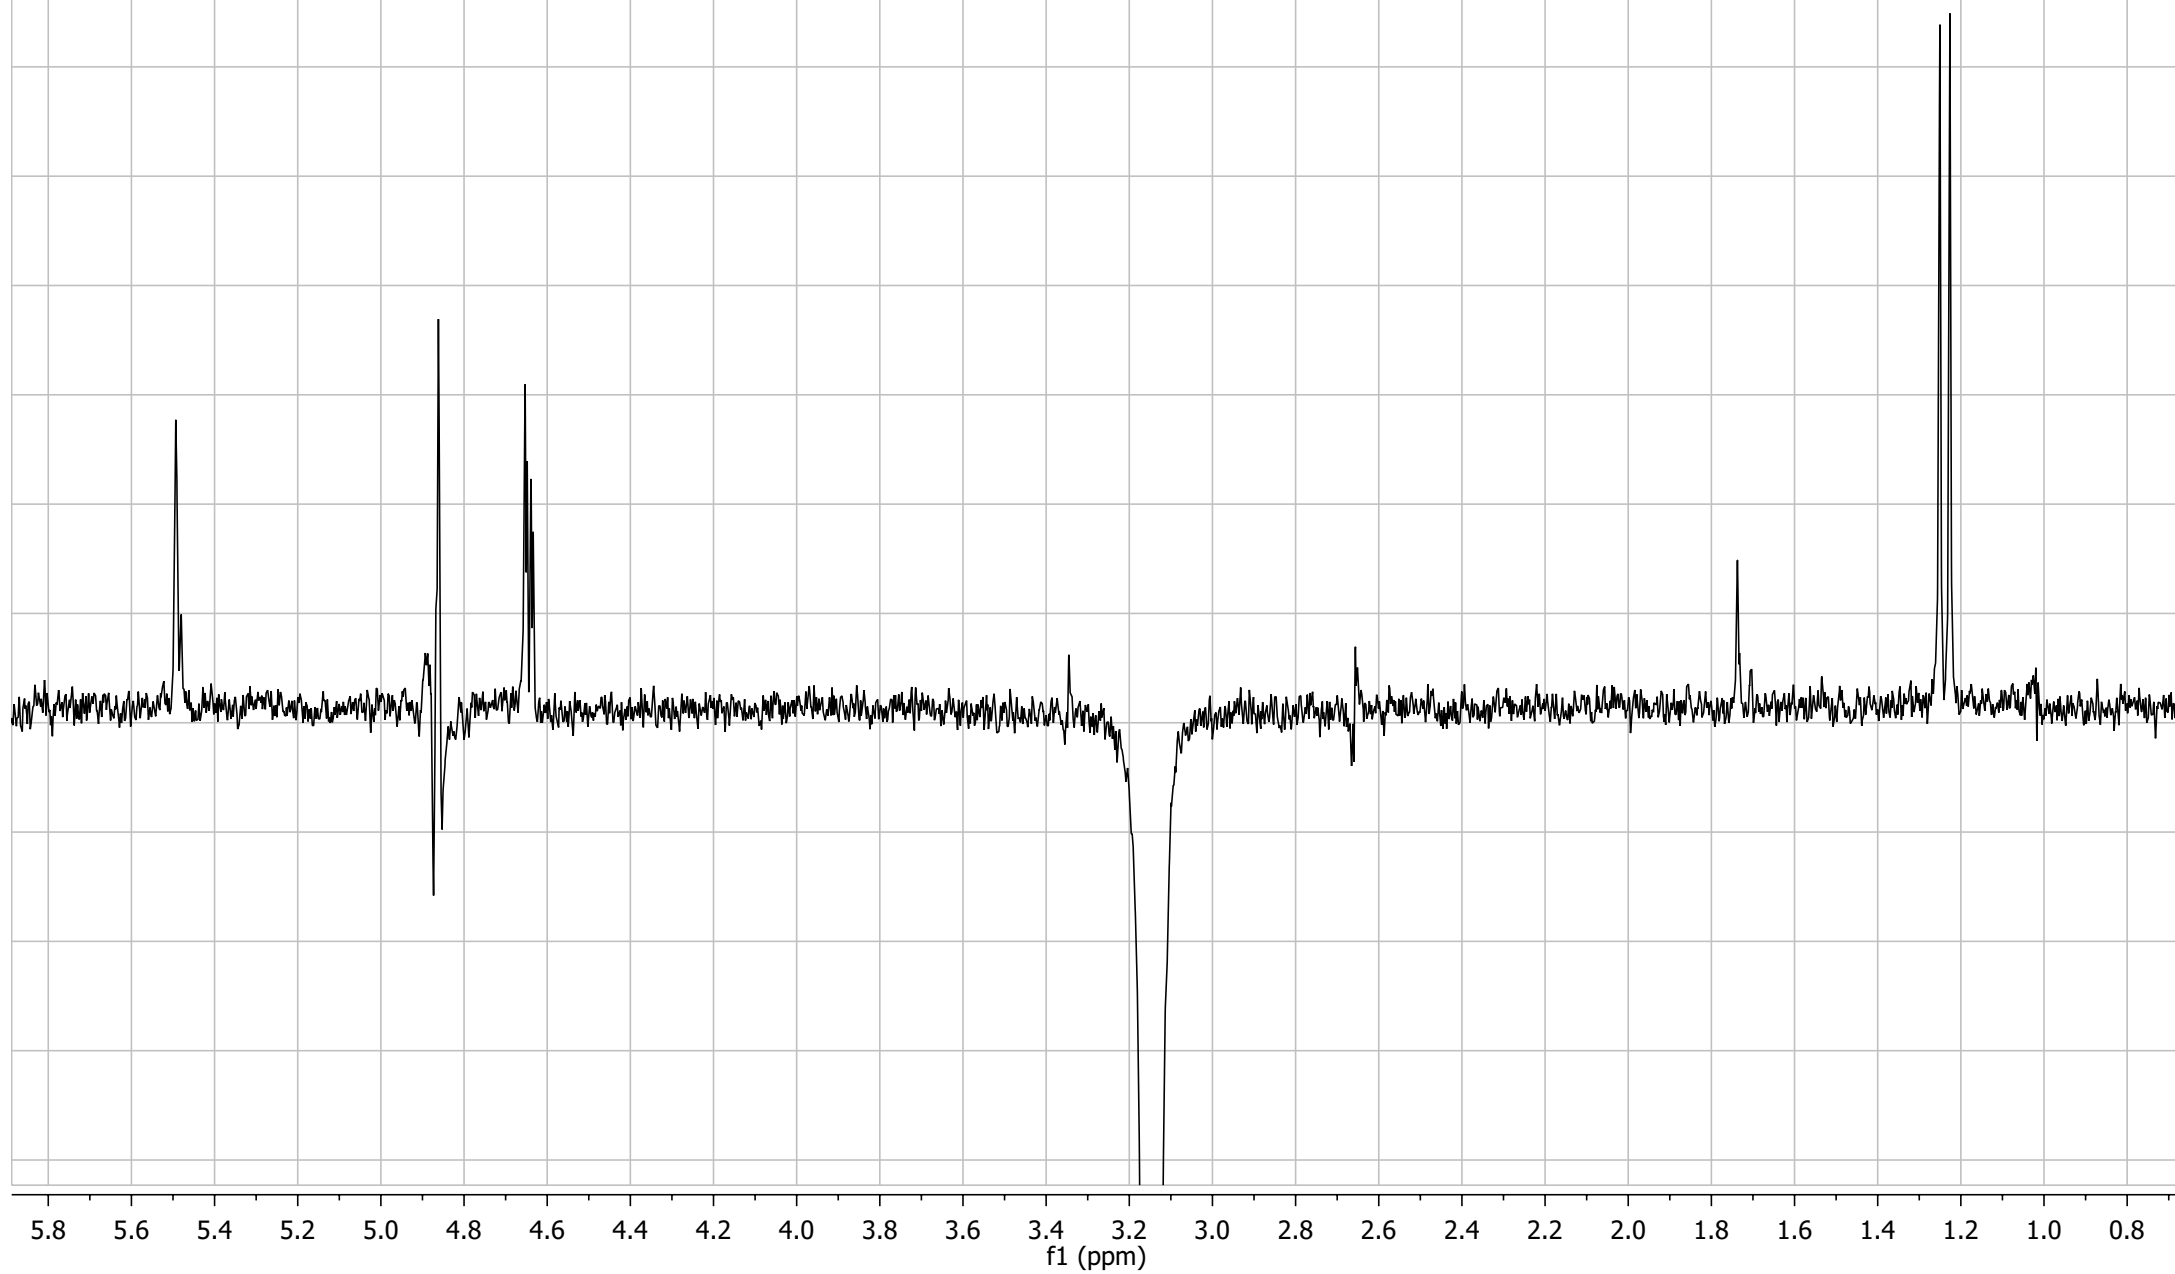

**S31.** Selective NOESY NMR of H-14 (1.74 ppm) in loba-8,10,13(15)-triene-16,17,18-triol in CD<sub>3</sub>OD

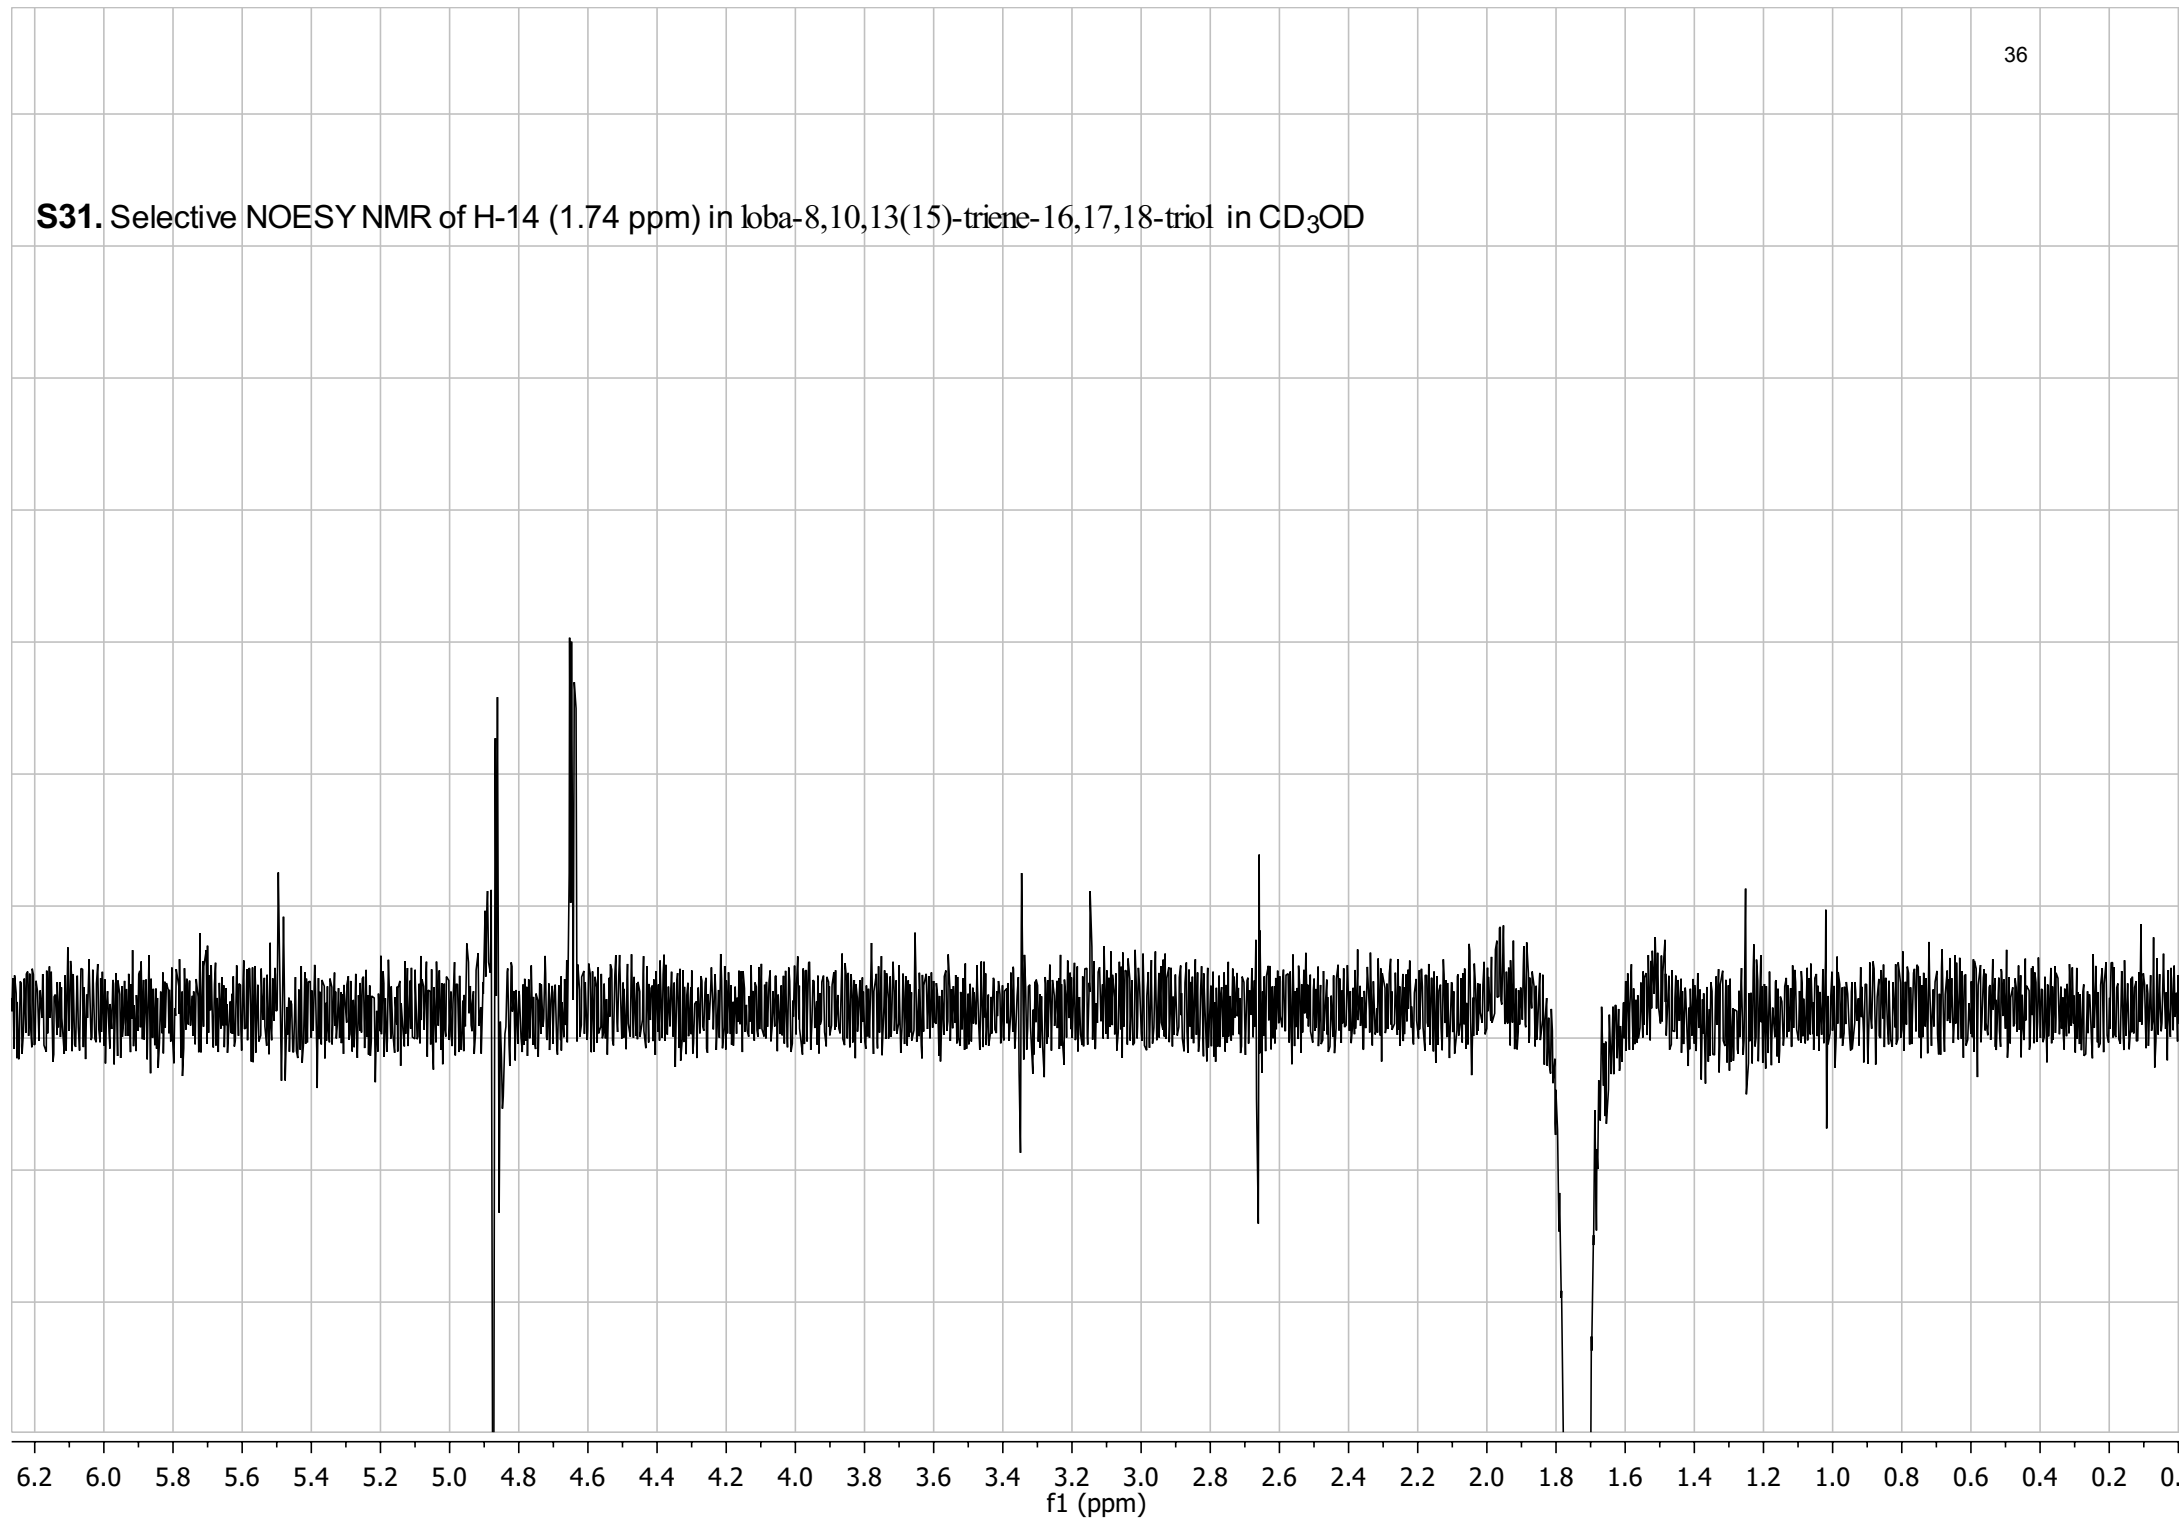

**S32.** Selective NOESY NMR of H-12 (1.71 ppm) in loba-8,10,13(15)-triene-16,17,18-triol in CD<sub>3</sub>OD

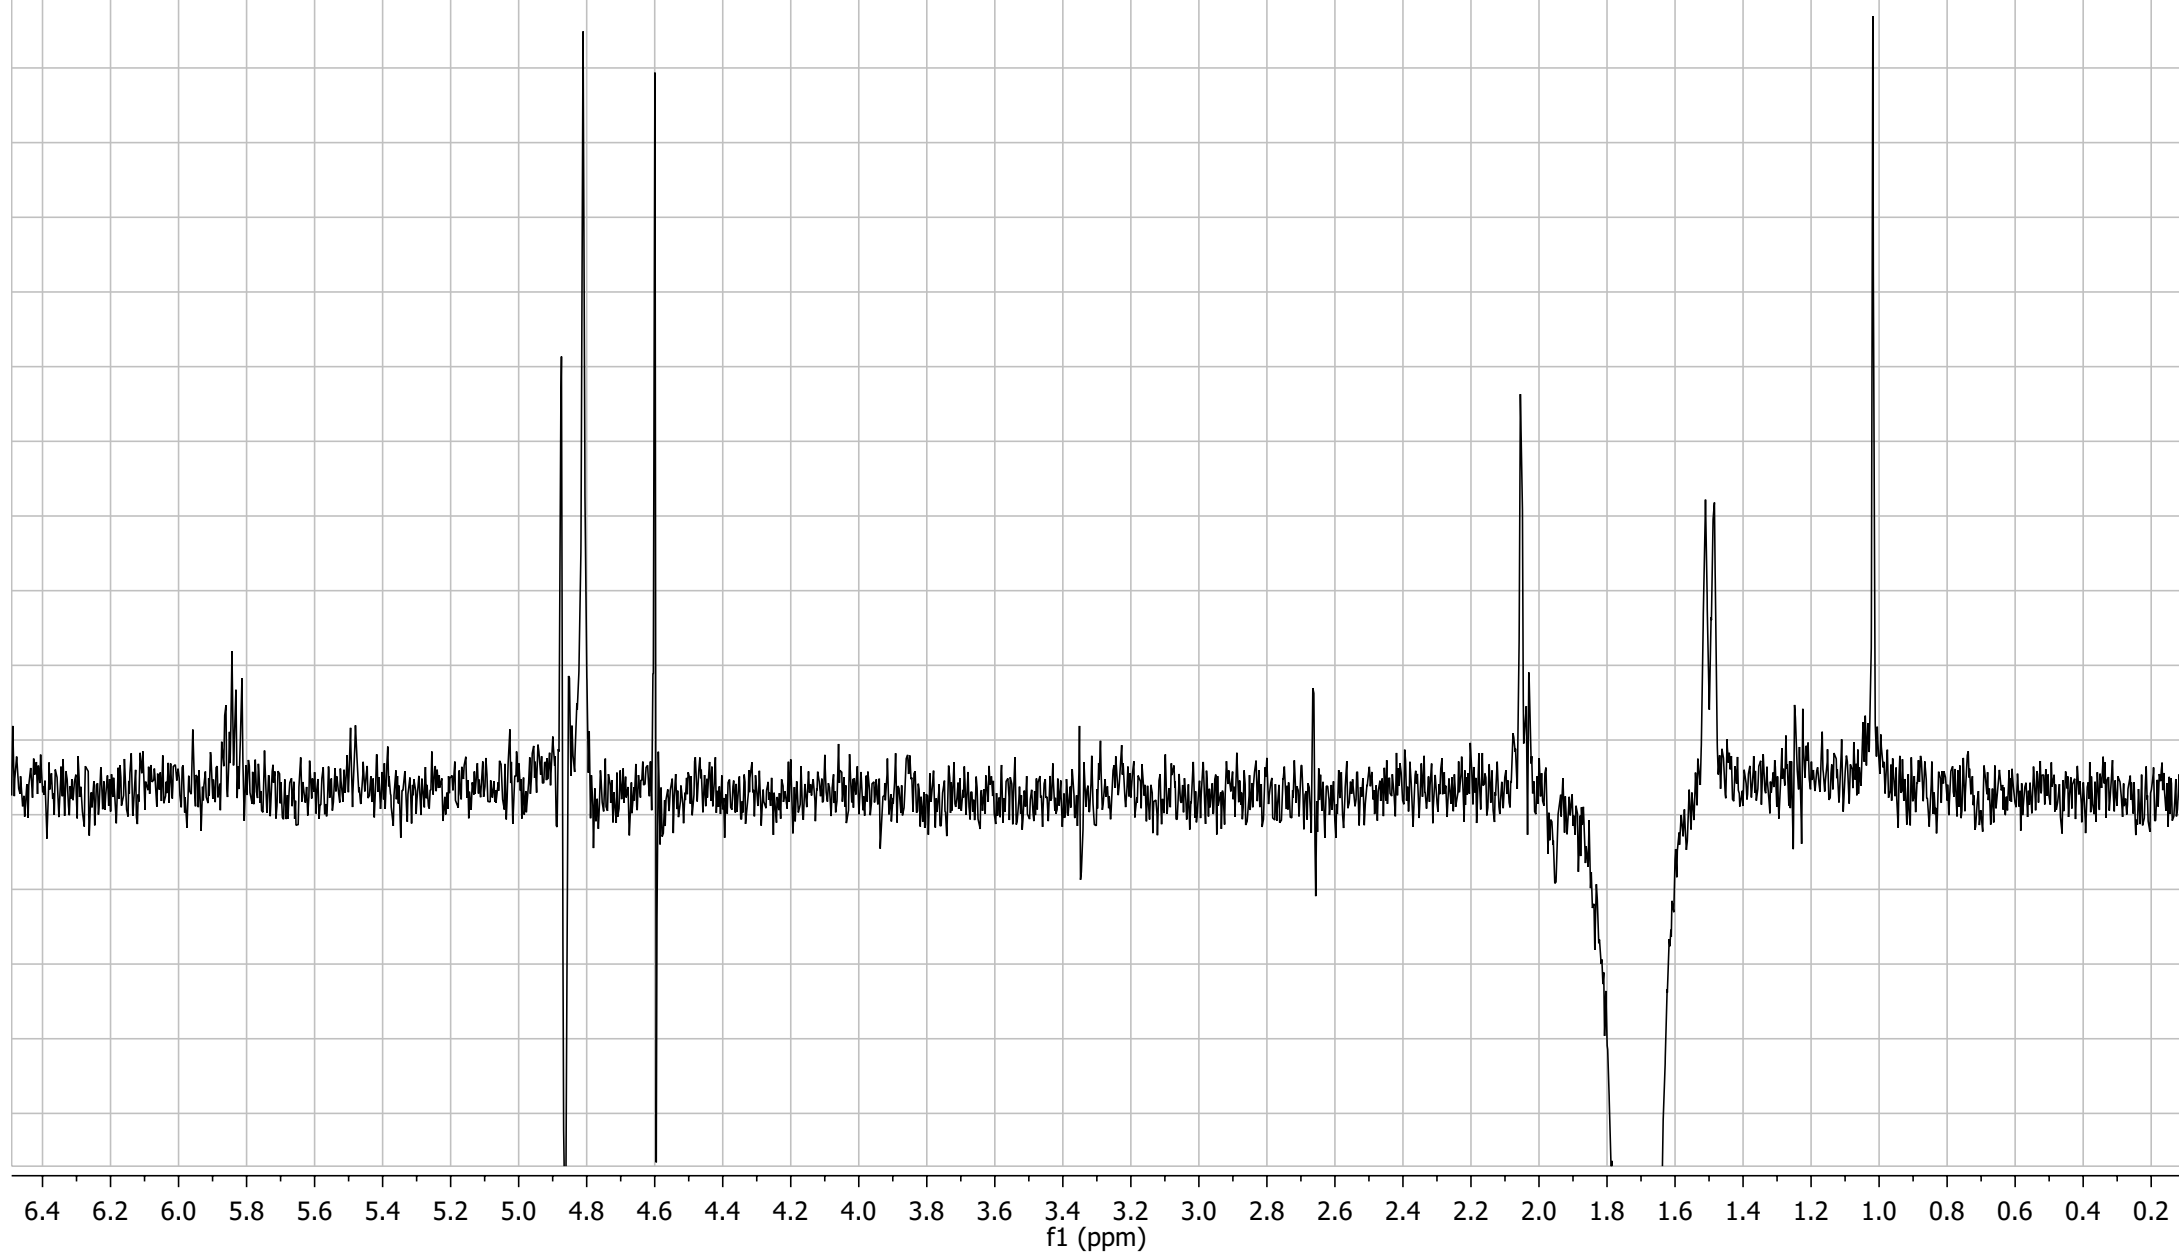

**S33.** Selective NOESY NMR of H-20 (1.25 ppm) in loba-8,10,13(15)-triene-16,17,18-triol in CD<sub>3</sub>OD

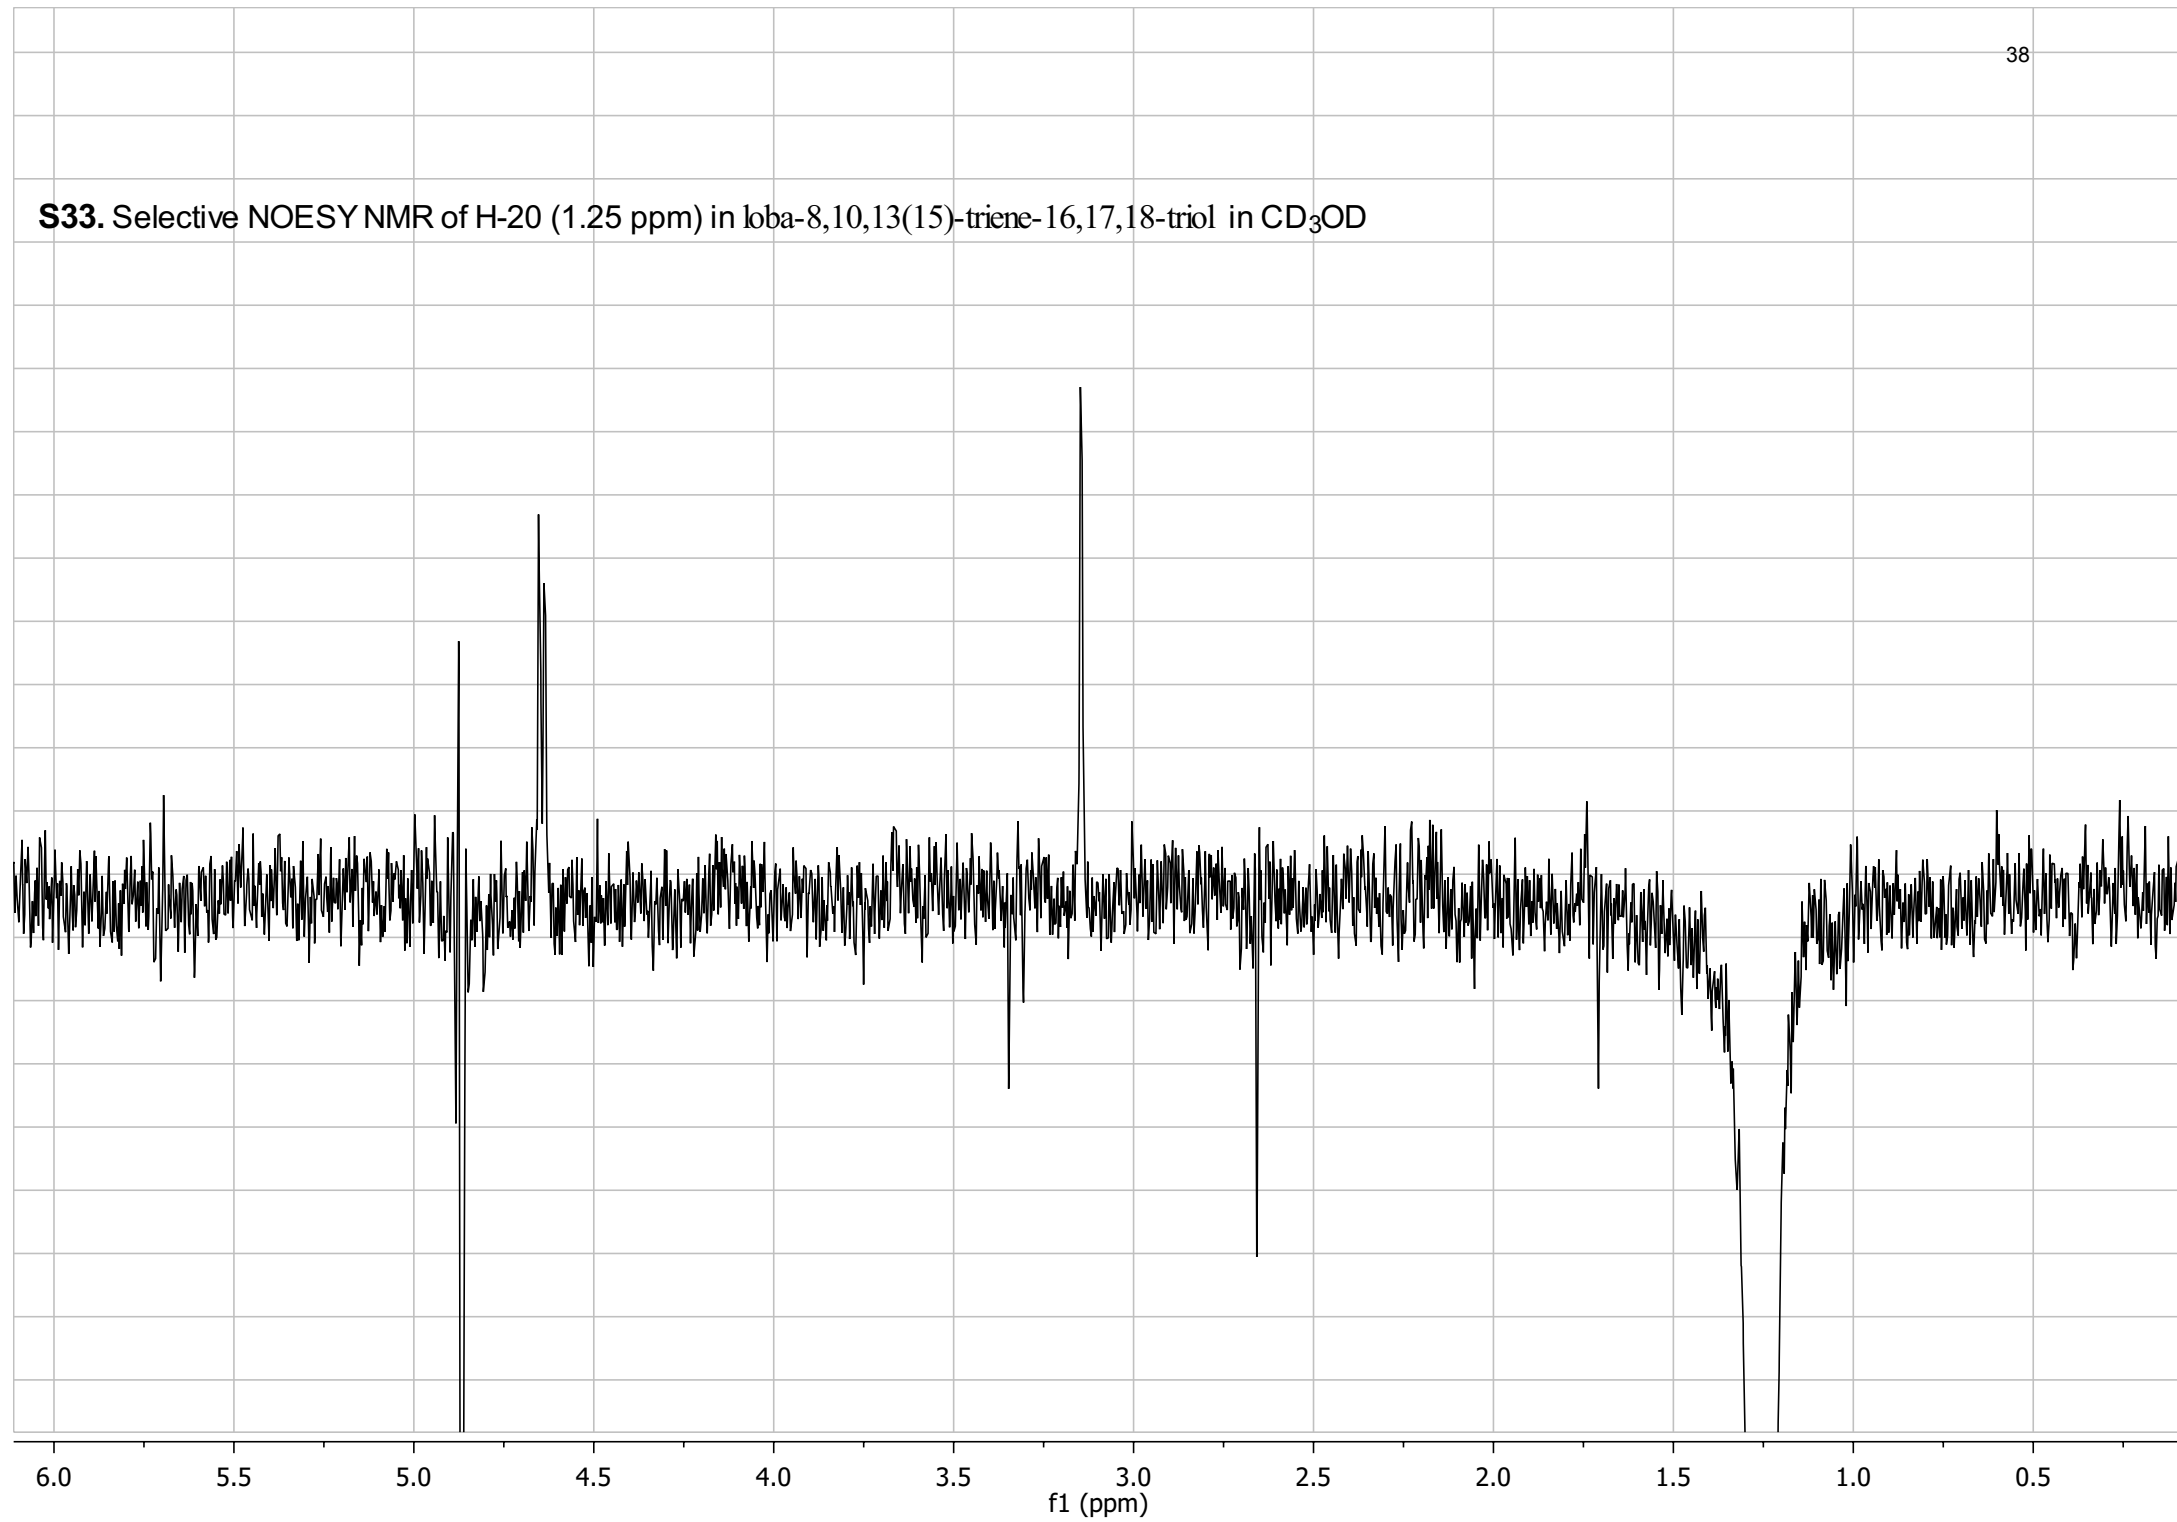

**S34.** Selective NOESY NMR of H-19 (1.23 ppm) in loba-8,10,13(15)-triene-16,17,18-triol in CD<sub>3</sub>OD

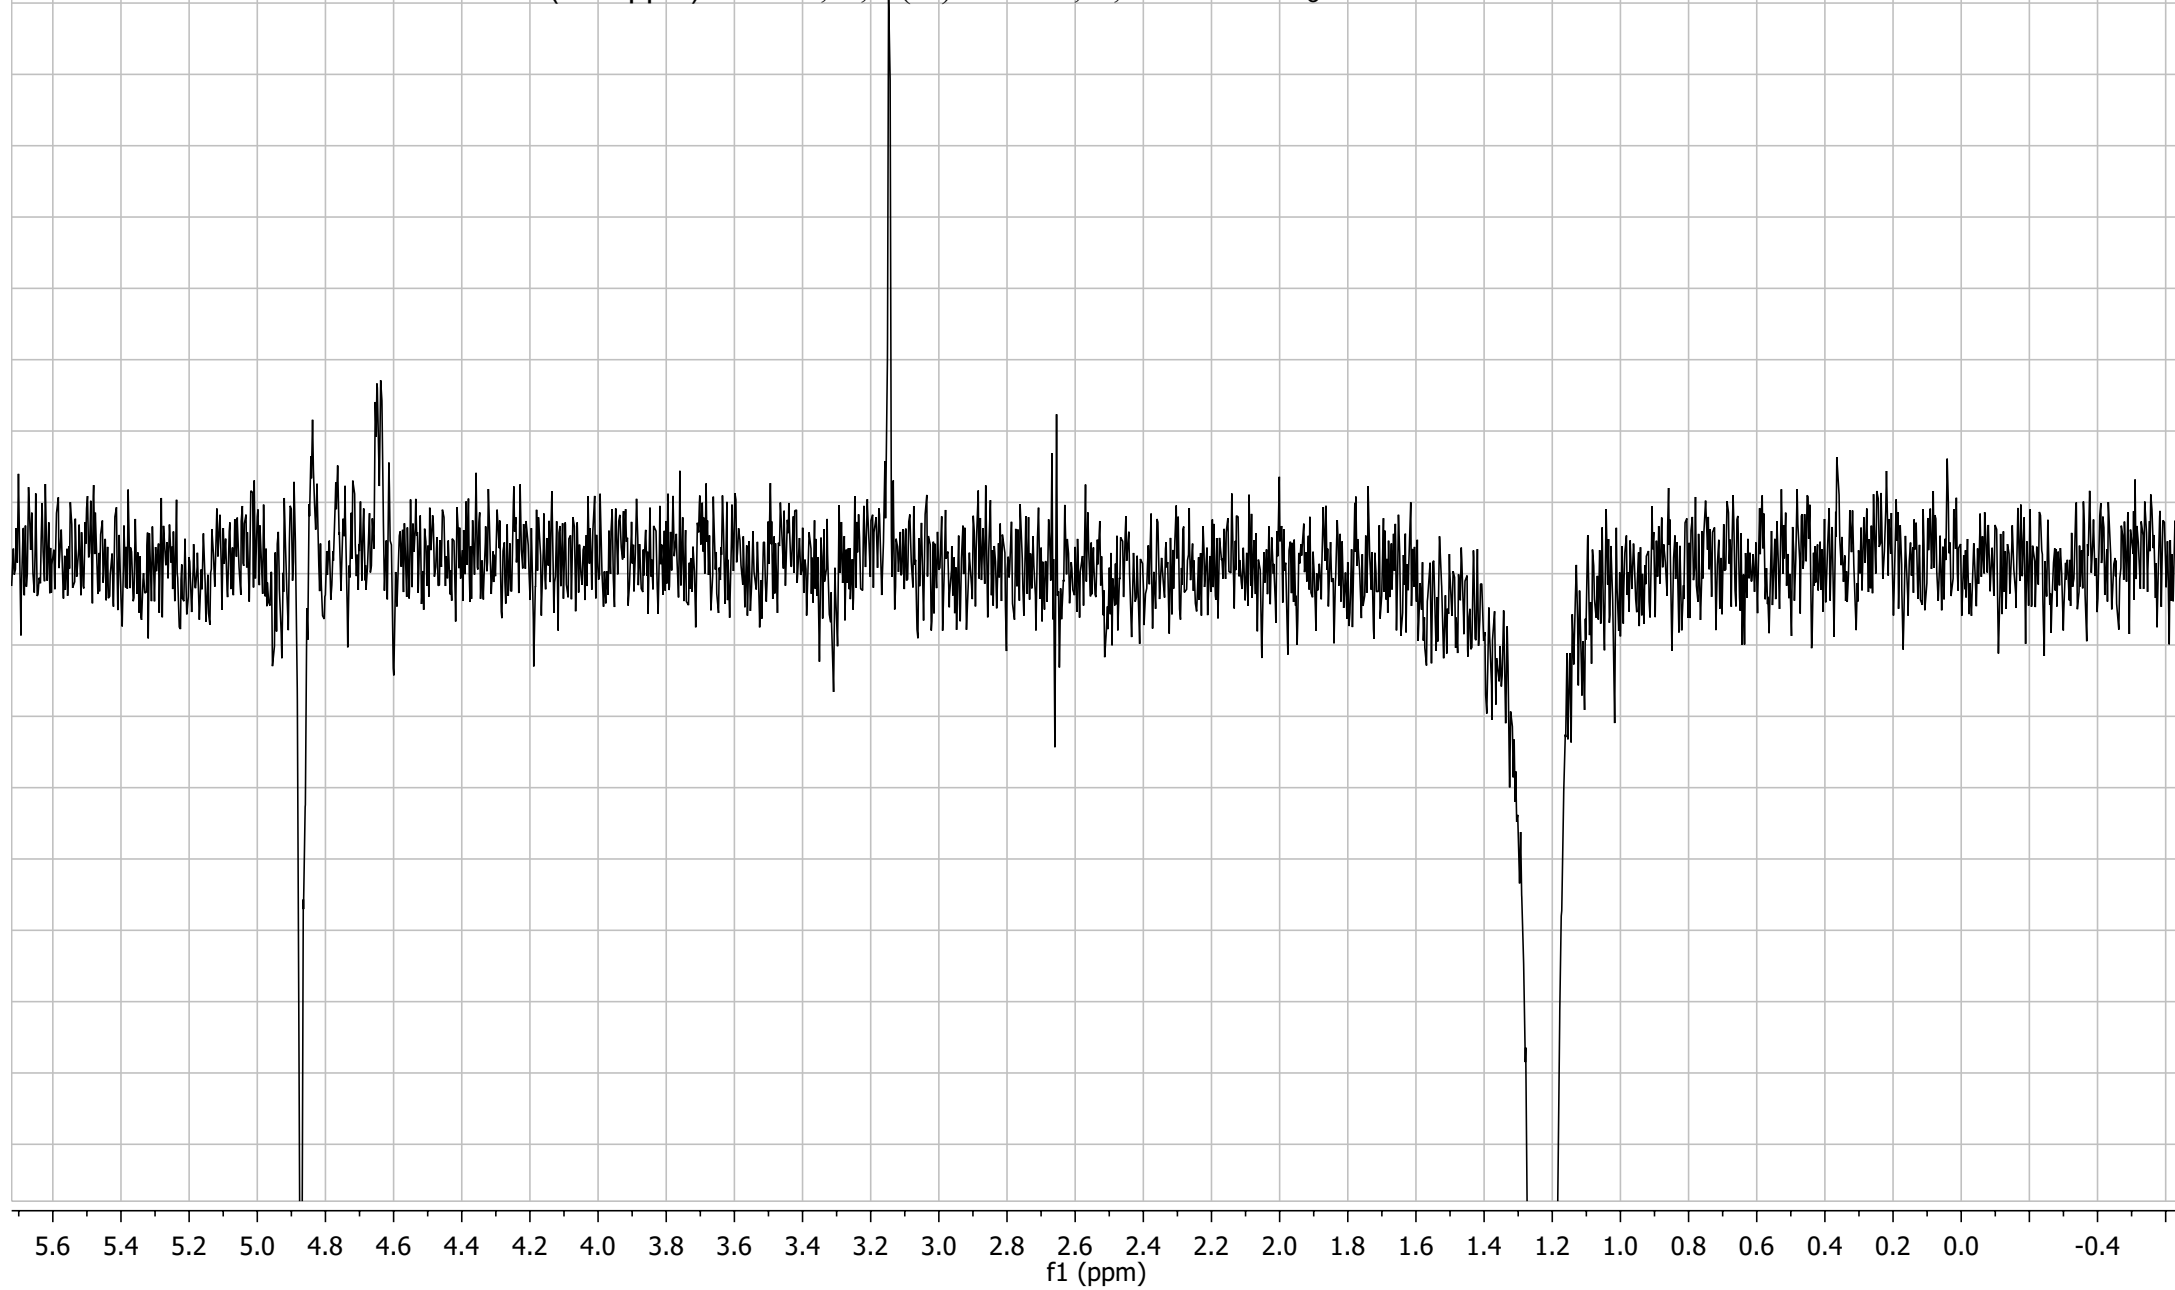

**S35.** Selective NOESY NMR of H-7 (1.02 ppm) in loba-8,10,13(15)-triene-16,17,18-triol in CD<sub>3</sub>OD

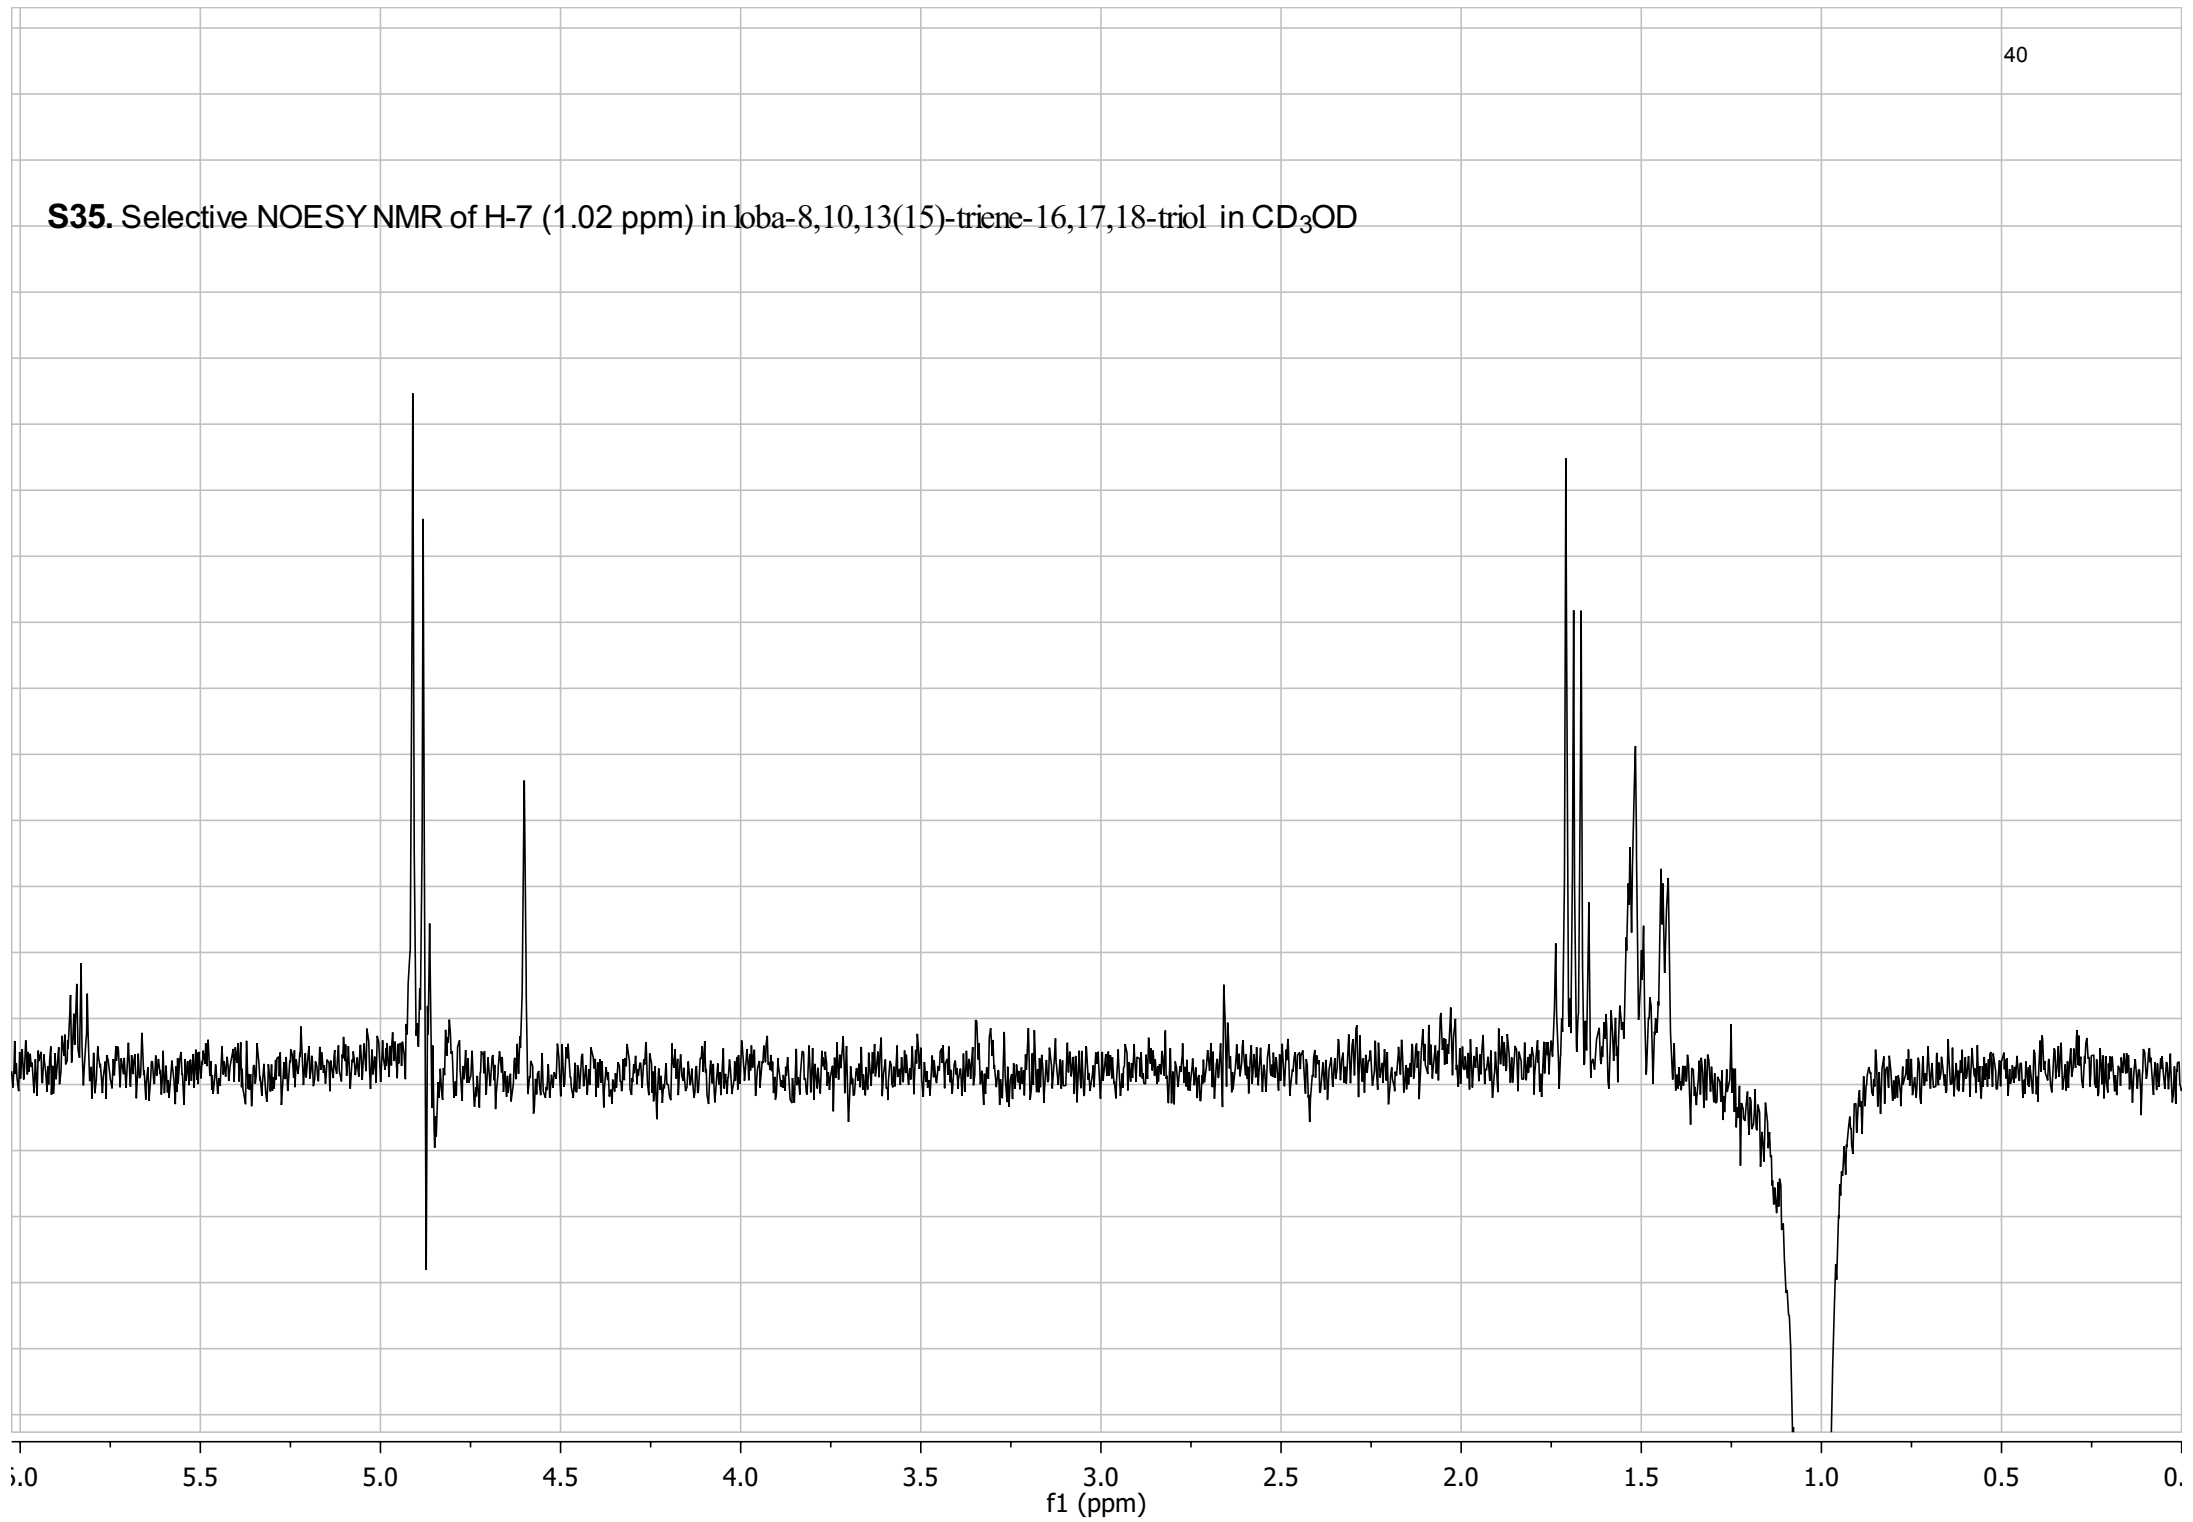



**Table S1.**  $^1\text{H}$  and  $^{13}\text{C}$  NMR data (300 MHz and 75 MHz,  $\text{CD}_3\text{OD}$ ) for loba-8,10,13(15)-triene-16,17,18-triol.

| No. | $^{13}\text{C}$<br>$\delta$ (m) | $^1\text{H}$<br>$\delta$ (m, J Hz) | COSY                                                    | gHMBC                           | nOe                                                                                                                                                      |
|-----|---------------------------------|------------------------------------|---------------------------------------------------------|---------------------------------|----------------------------------------------------------------------------------------------------------------------------------------------------------|
| 1   | 40.8 (s)                        |                                    |                                                         |                                 |                                                                                                                                                          |
| 2   | 54.0(d)                         | 2.05 (1H, m)                       | H-3                                                     | C-1, C-3, C-7, C-10, C-11, C-12 | H-12                                                                                                                                                     |
| 3   | 33.9 (t)                        | 1.68 (1H, m)                       | H-2, H-4                                                | C-1, C-4                        | H-7, H-12                                                                                                                                                |
|     |                                 | 1.50 (1H, m)                       |                                                         | C-1, C-4, C-5                   |                                                                                                                                                          |
| 4   | 48.6 (d)                        | 1.97 (1H, m)                       | H-3, H <sub>a</sub> -5, H <sub>b</sub> -5               | C-5, C-13, C-15                 |                                                                                                                                                          |
| 5   | 27.7 (t)                        | 1.60 (1H, m)                       | H-4, H <sub>b</sub> -5, H <sub>b</sub> -6               | C-1, C-3                        |                                                                                                                                                          |
|     |                                 | 1.52 (1H, m)                       | H-4, H <sub>a</sub> -5, H <sub>b</sub> -6               |                                 | H-7                                                                                                                                                      |
| 6   | 41.1 (t)                        | 1.53 (1H, m)                       | H <sub>a</sub> -5, H <sub>b</sub> -6                    | C-1, C-7                        | H-7                                                                                                                                                      |
|     |                                 | 1.43 (1H, m)                       | H <sub>a</sub> -5, H <sub>b</sub> -5, H <sub>a</sub> -6 | C-1, C-2, C-4, C-7              | H-7                                                                                                                                                      |
| 7   | 17.1 (q)                        | 1.02 (3H, s)                       |                                                         | C-2, C-6, C-8                   | H <sub>a</sub> -3, H <sub>b</sub> -5, H <sub>a</sub> -6, H <sub>b</sub> -6, H-8,<br>H <sub>a</sub> -9, H <sub>b</sub> -9, H <sub>b</sub> -11, H-12, H-14 |
| 8   | 151.6 (d)                       | 5.84 (1H, dd, 10.9, 17.5)          | H <sub>a</sub> -9, H <sub>b</sub> -9                    | C-1, C-2, C-7, C-8              | H-7, H-12                                                                                                                                                |
| 9   | 110.4 (t)                       | 4.91 (1H, dd, 1.3, 17.5)           | H-8, H <sub>b</sub> -9                                  | C-1, C-2, C-8                   | H-7, H-14                                                                                                                                                |
|     |                                 | 4.87 (1H, dd, 1.3, 10.9)           | H-8, H <sub>b</sub> -9                                  | C-1, C-2, C-8                   | H-7, H-12, H-14                                                                                                                                          |
| 10  | 149.0 (s)                       |                                    |                                                         |                                 |                                                                                                                                                          |
| 11  | 112.7 (t)                       | 4.81 (1H, brt, 1.4)                | H <sub>b</sub> -11, H <sub>3</sub> -12                  | C-1, C-2, C-10, C-12            | H-12                                                                                                                                                     |
|     |                                 | 4.60 (1H, brs)                     | H <sub>a</sub> -11, H <sub>3</sub> -12                  | C-1, C-2, C-10, C-12            | H-7, H-12                                                                                                                                                |
| 12  | 25.3 (q)                        | 1.71 (3H, brs)                     | H <sub>a</sub> -11, H <sub>b</sub> -11                  | C-1, C-2, C-10, C-11            | H-2, H <sub>a</sub> -3, H-7, H-8, H <sub>b</sub> -9, H <sub>a</sub> -<br>11, H <sub>b</sub> -11, H-15, H-20                                              |
| 13  | 151.6 (s)                       |                                    |                                                         |                                 |                                                                                                                                                          |
| 14  | 15.3 (q)                        | 1.74 (3H, d, 1.1)                  |                                                         | C-4, C-13, C-15                 | H-7, H <sub>a</sub> -9, H <sub>b</sub> -9, H-15, H-16,<br>H-17, H-20                                                                                     |
| 15  | 125.6 (d)                       | 5.49 (1H, brd, 8.8)                | H-14, H-16                                              | C-3, C-4, C-14, C-17            | H-12, H-14, H-16, H-17                                                                                                                                   |
| 16  | 68.5 (d)                        | 4.65 (1H, dd, 3.0, 8.8)            | H-15, H-17                                              | C-13, C-15, C-18                | H-14, H-15, H-17, H-18, H-<br>19, H-20                                                                                                                   |
| 17  | 80.3 (d)                        | 3.15 (1H, d, 3.0)                  | H-16                                                    | C-15, C-18, C-19, C-20          | H-14, H-15, H-16, H-19, H-20                                                                                                                             |
| 18  | 74.2 (s)                        |                                    |                                                         |                                 | H-16                                                                                                                                                     |
| 19  | 26.5 (q)                        | 1.23 (3H, s)                       |                                                         | C-17, C-18, C-20                | H-16, H-17                                                                                                                                               |
| 20  | 27.0 (q)                        | 1.25 (3H, s)                       |                                                         | C-17, C-18, C-19                | H-12, H-14, H-16, H-17                                                                                                                                   |

S36. <sup>1</sup>H NMR of lobatrienolide in CD<sub>3</sub>OD

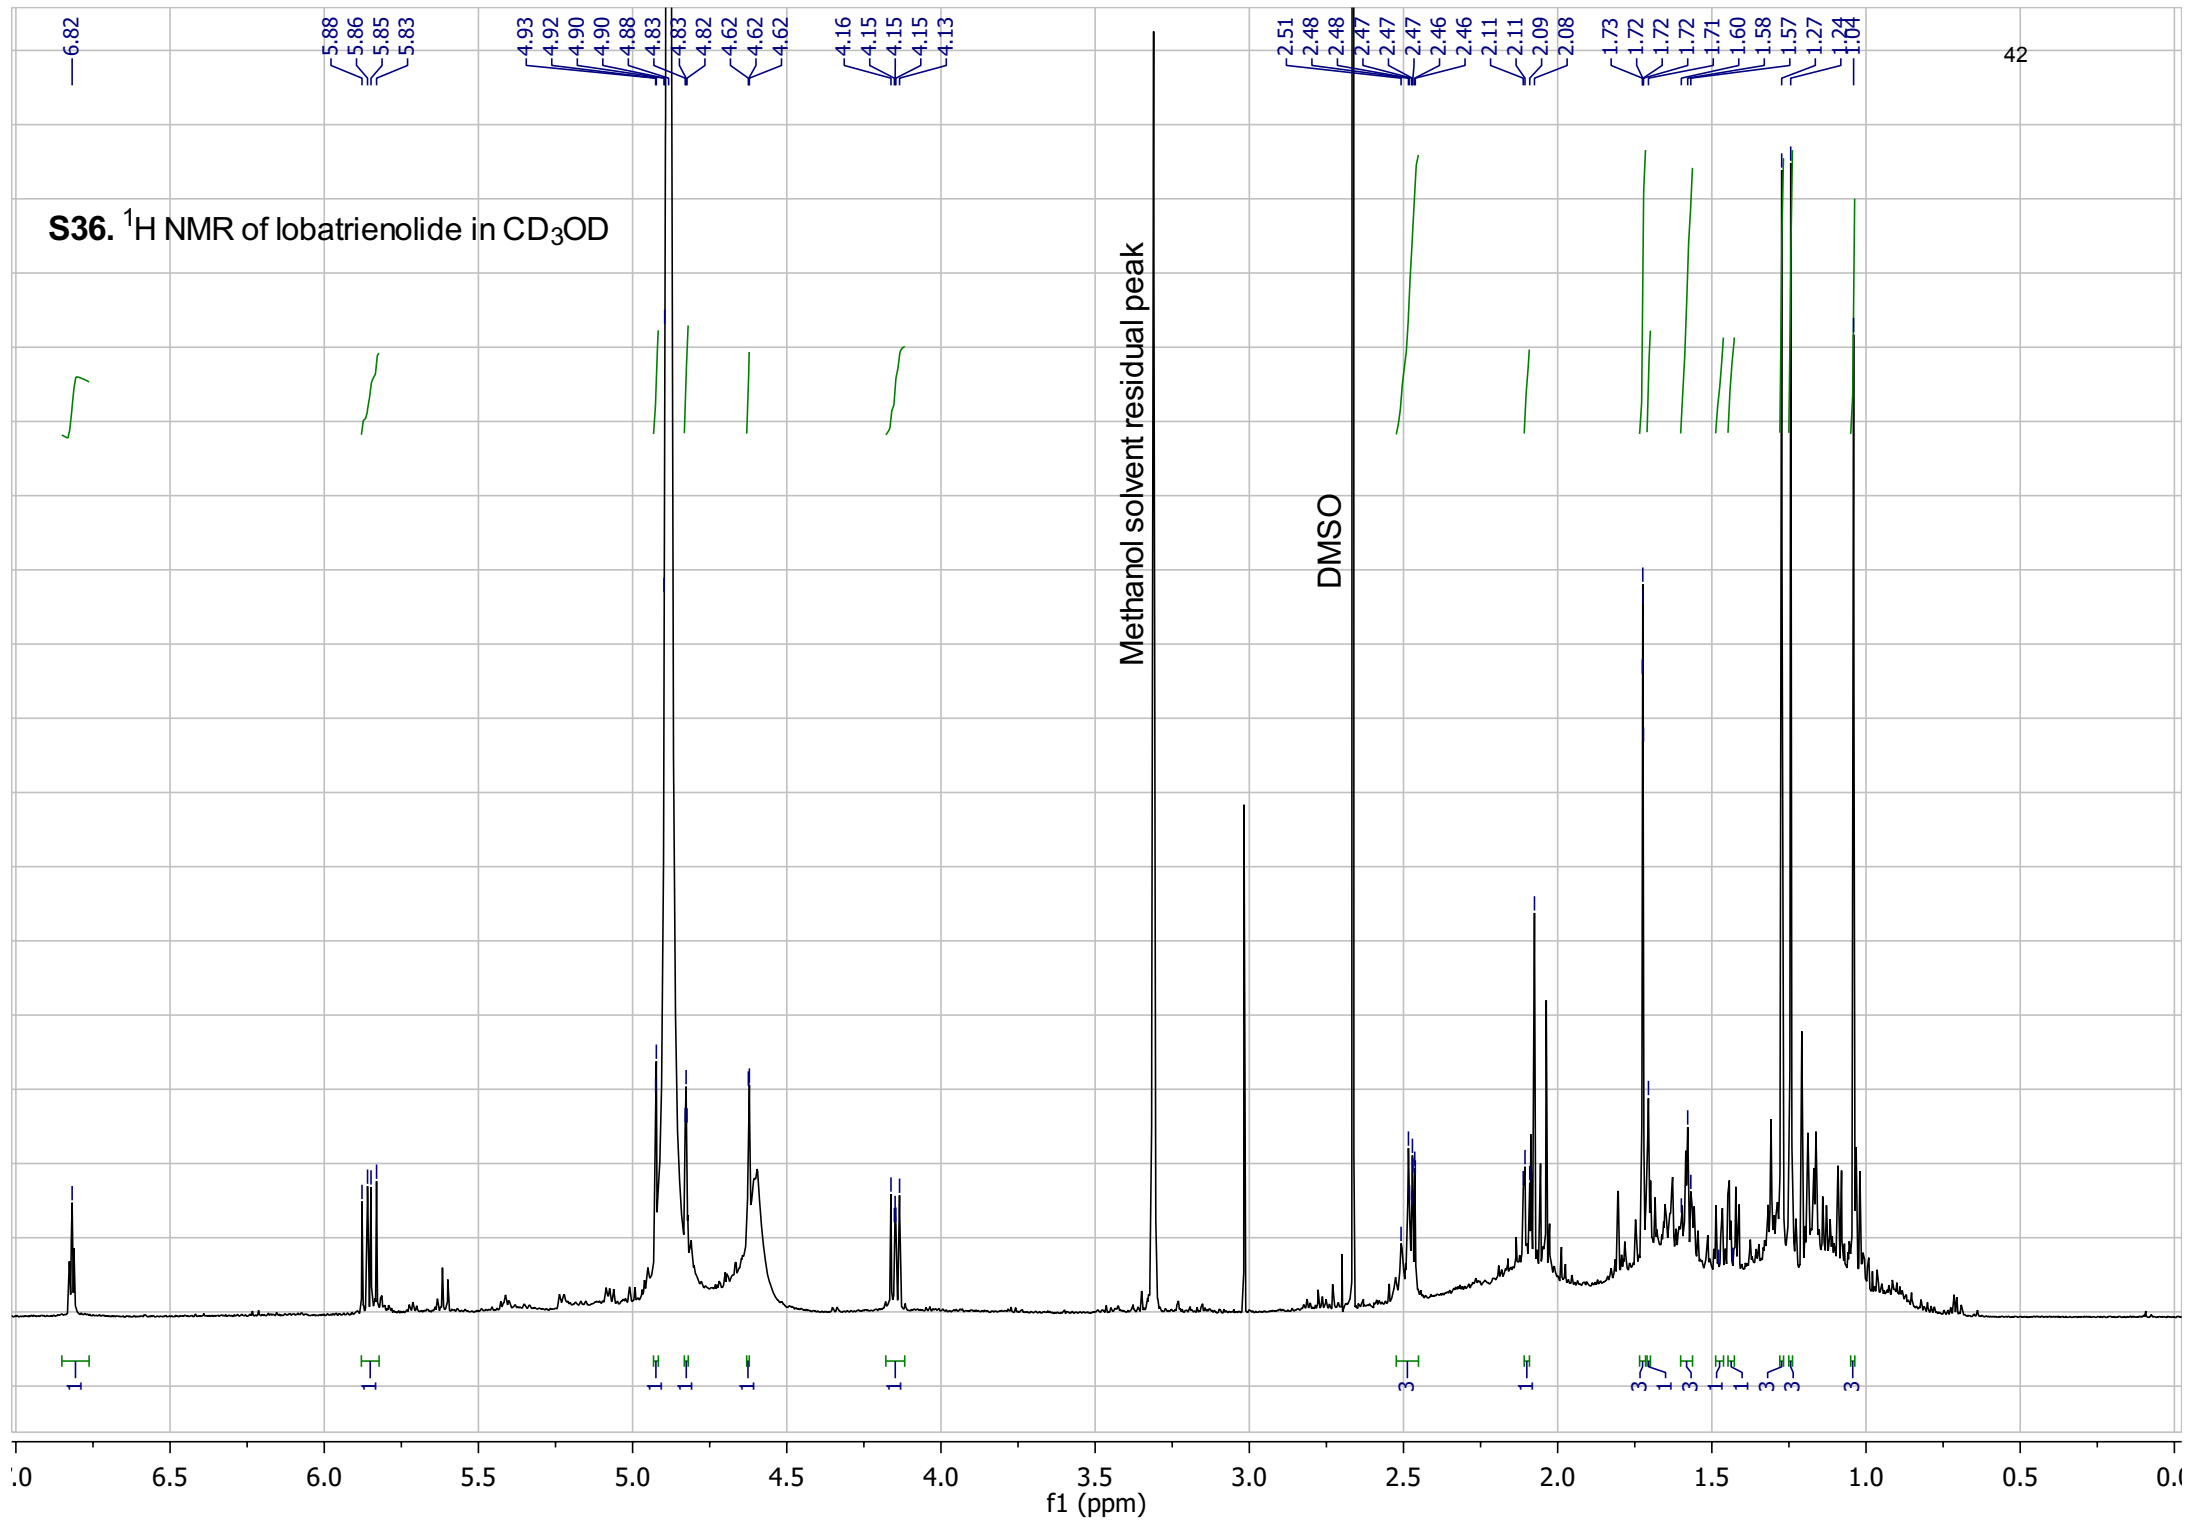

S37. <sup>13</sup>C NMR of lobatrienolide in CD<sub>3</sub>OD

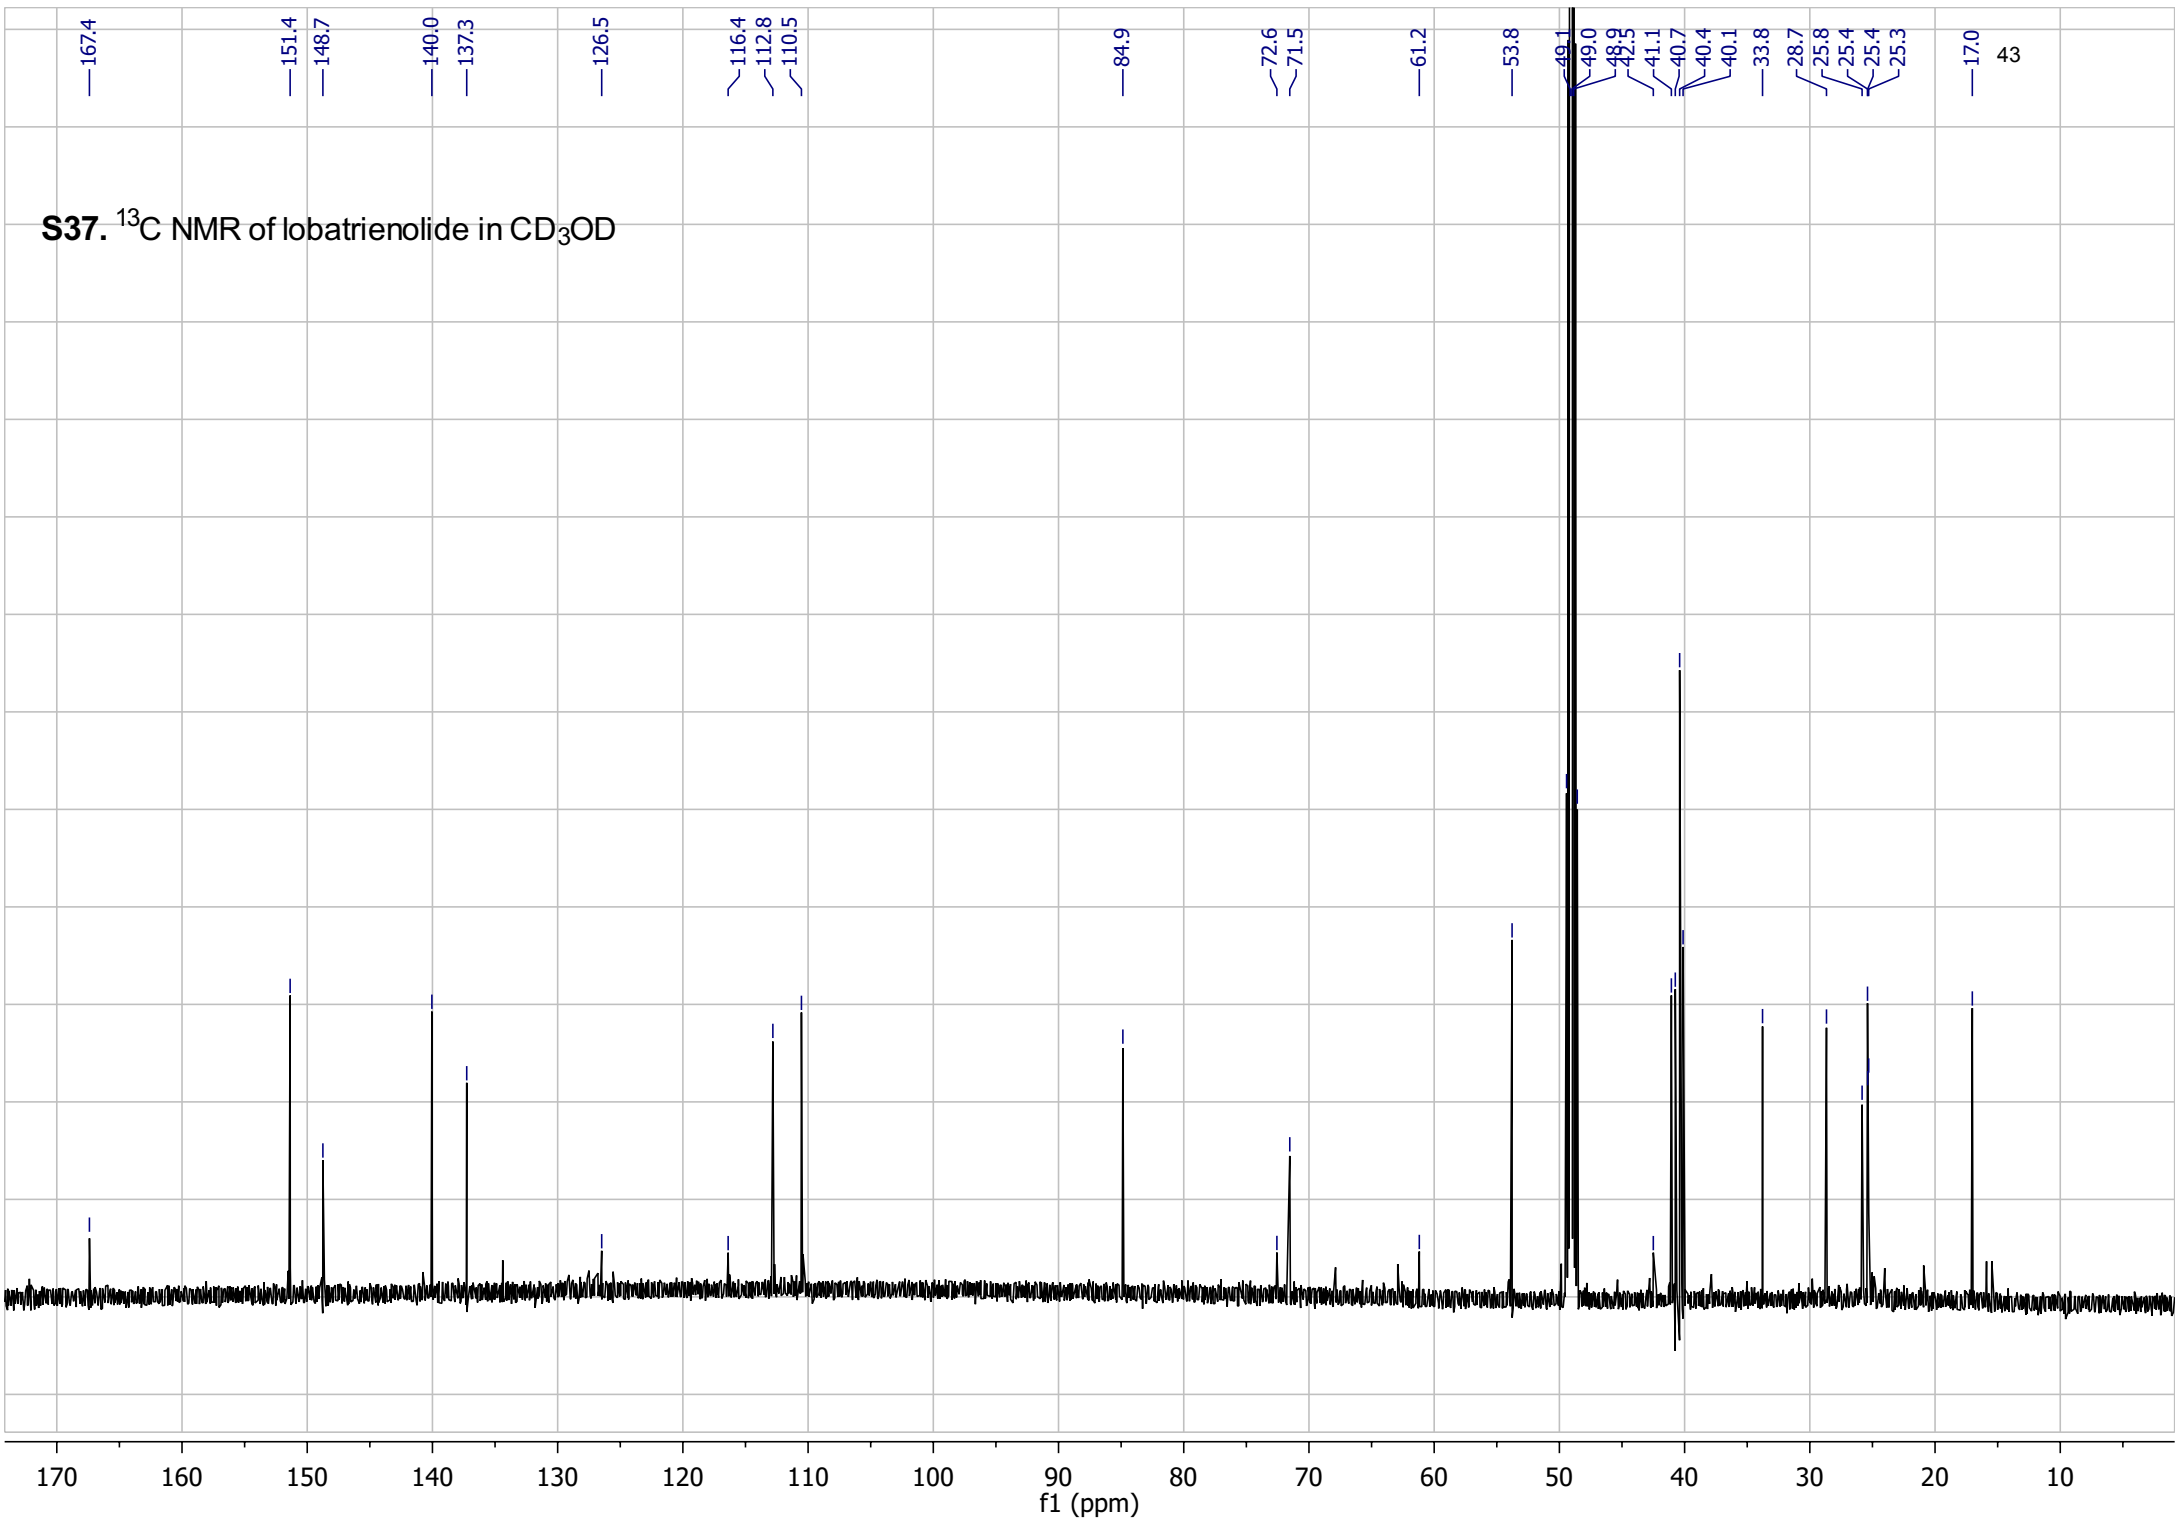

S38. DEPT NMR of lobatrienolide in CD<sub>3</sub>OD

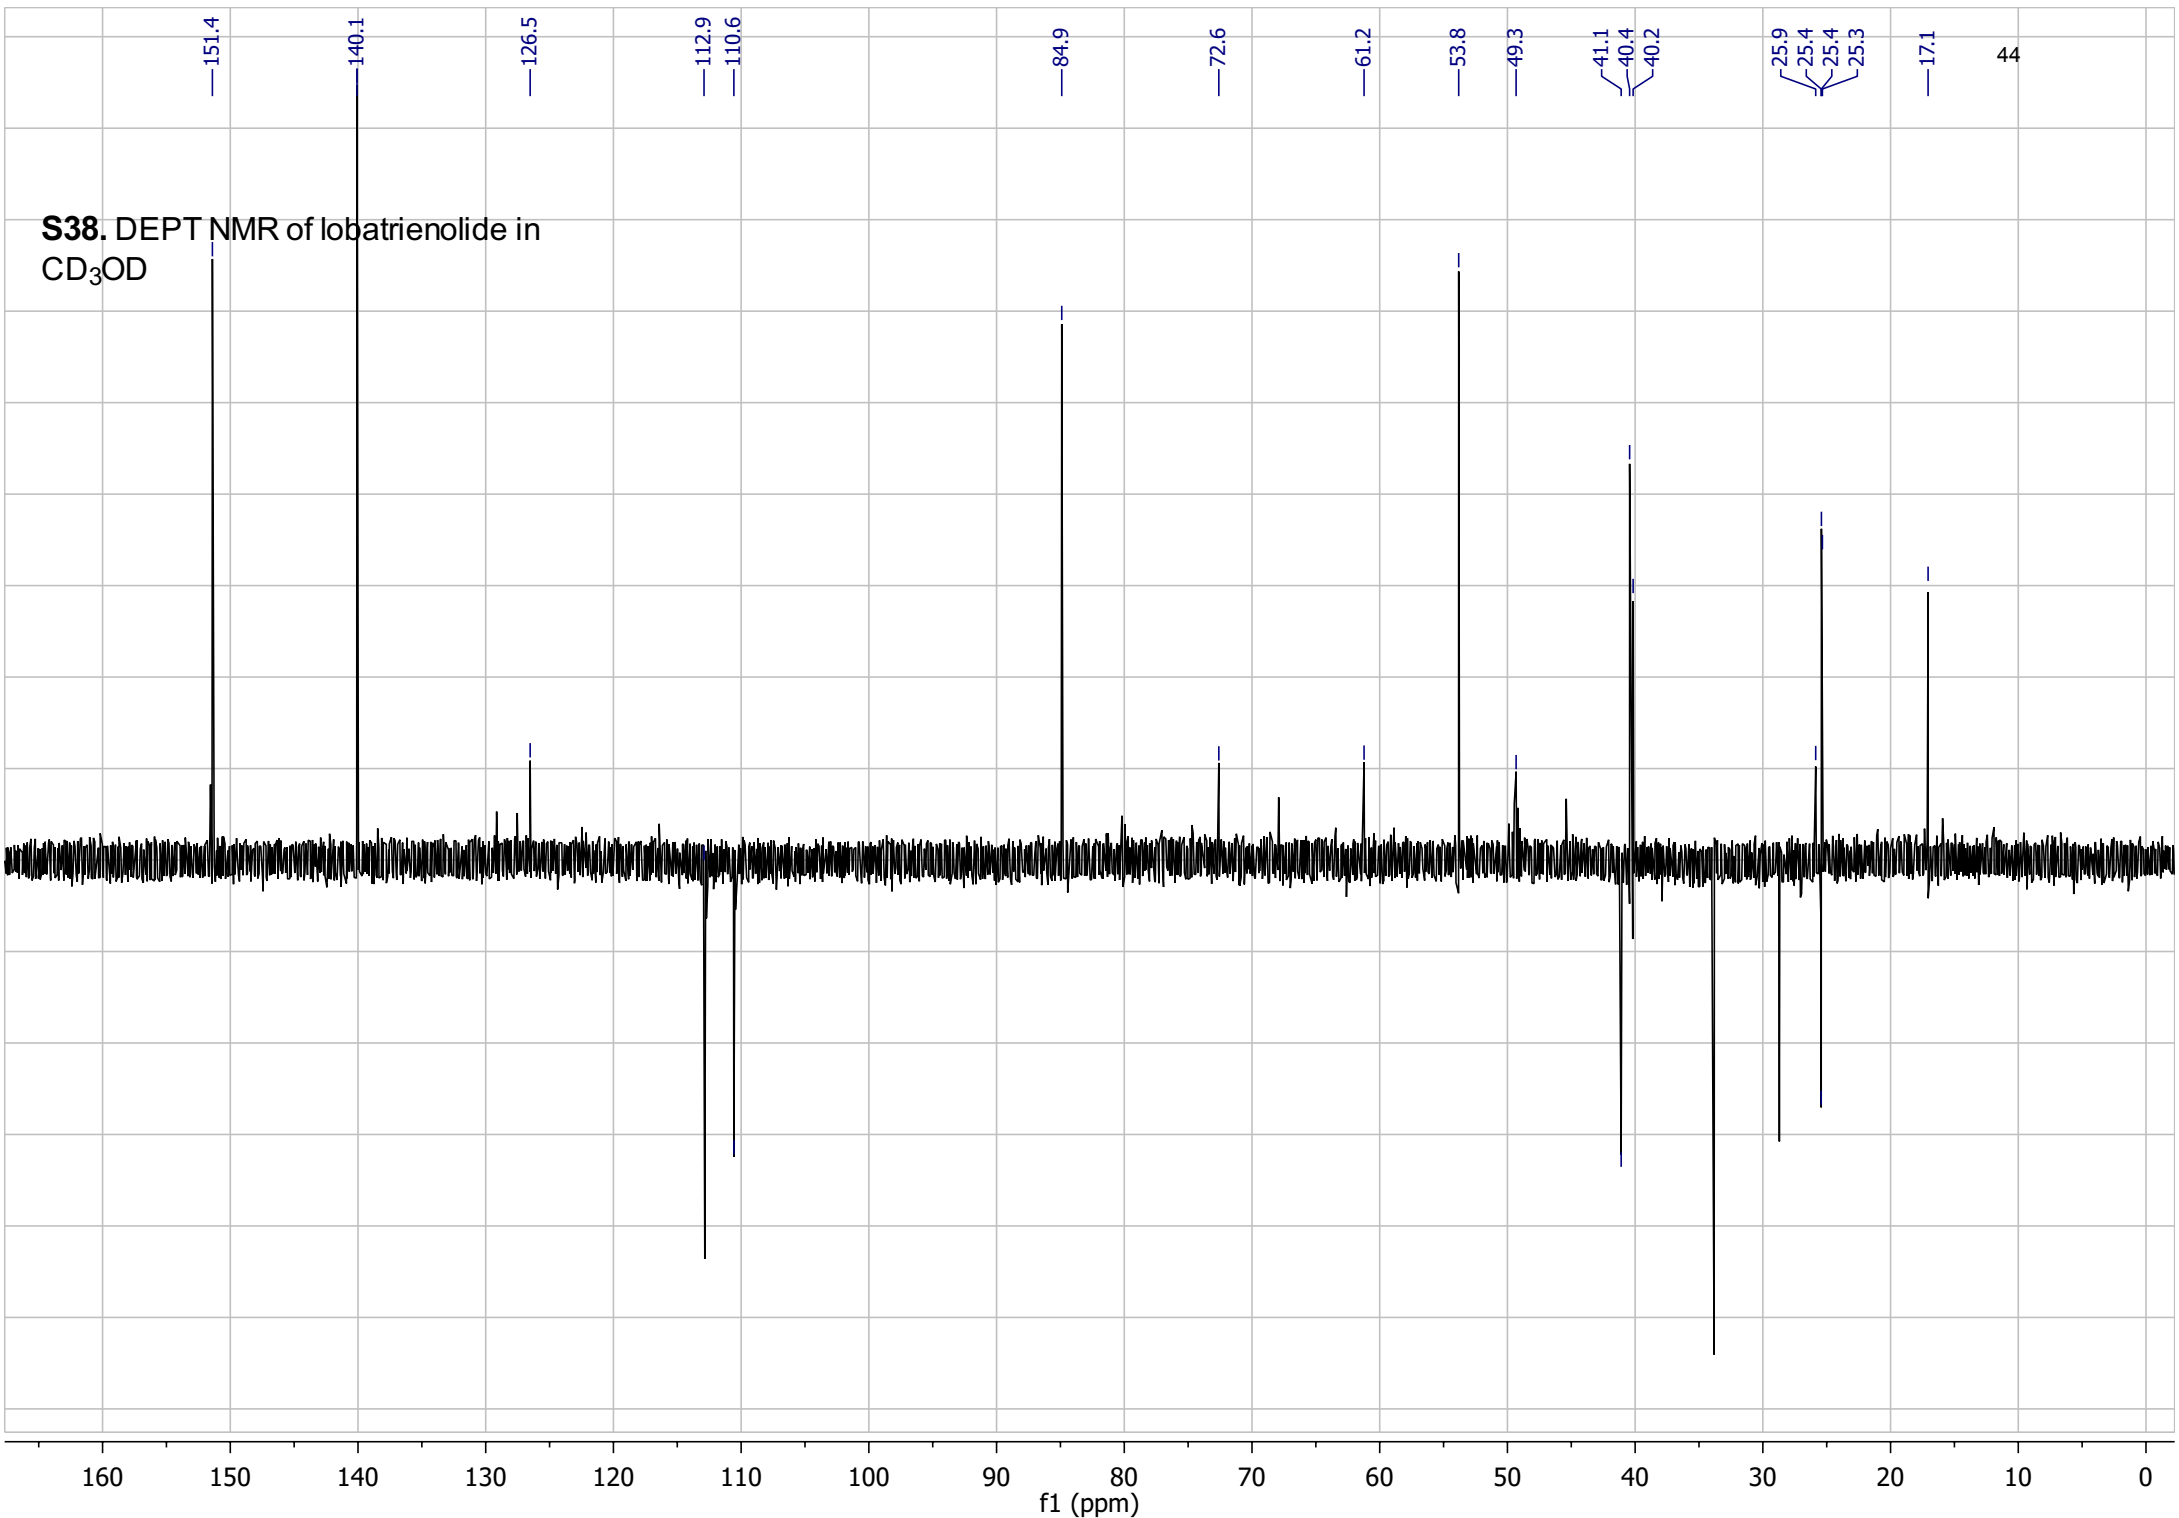

**S39.** COSY NMR of lobatrienolide in  $\text{CD}_3\text{OD}$

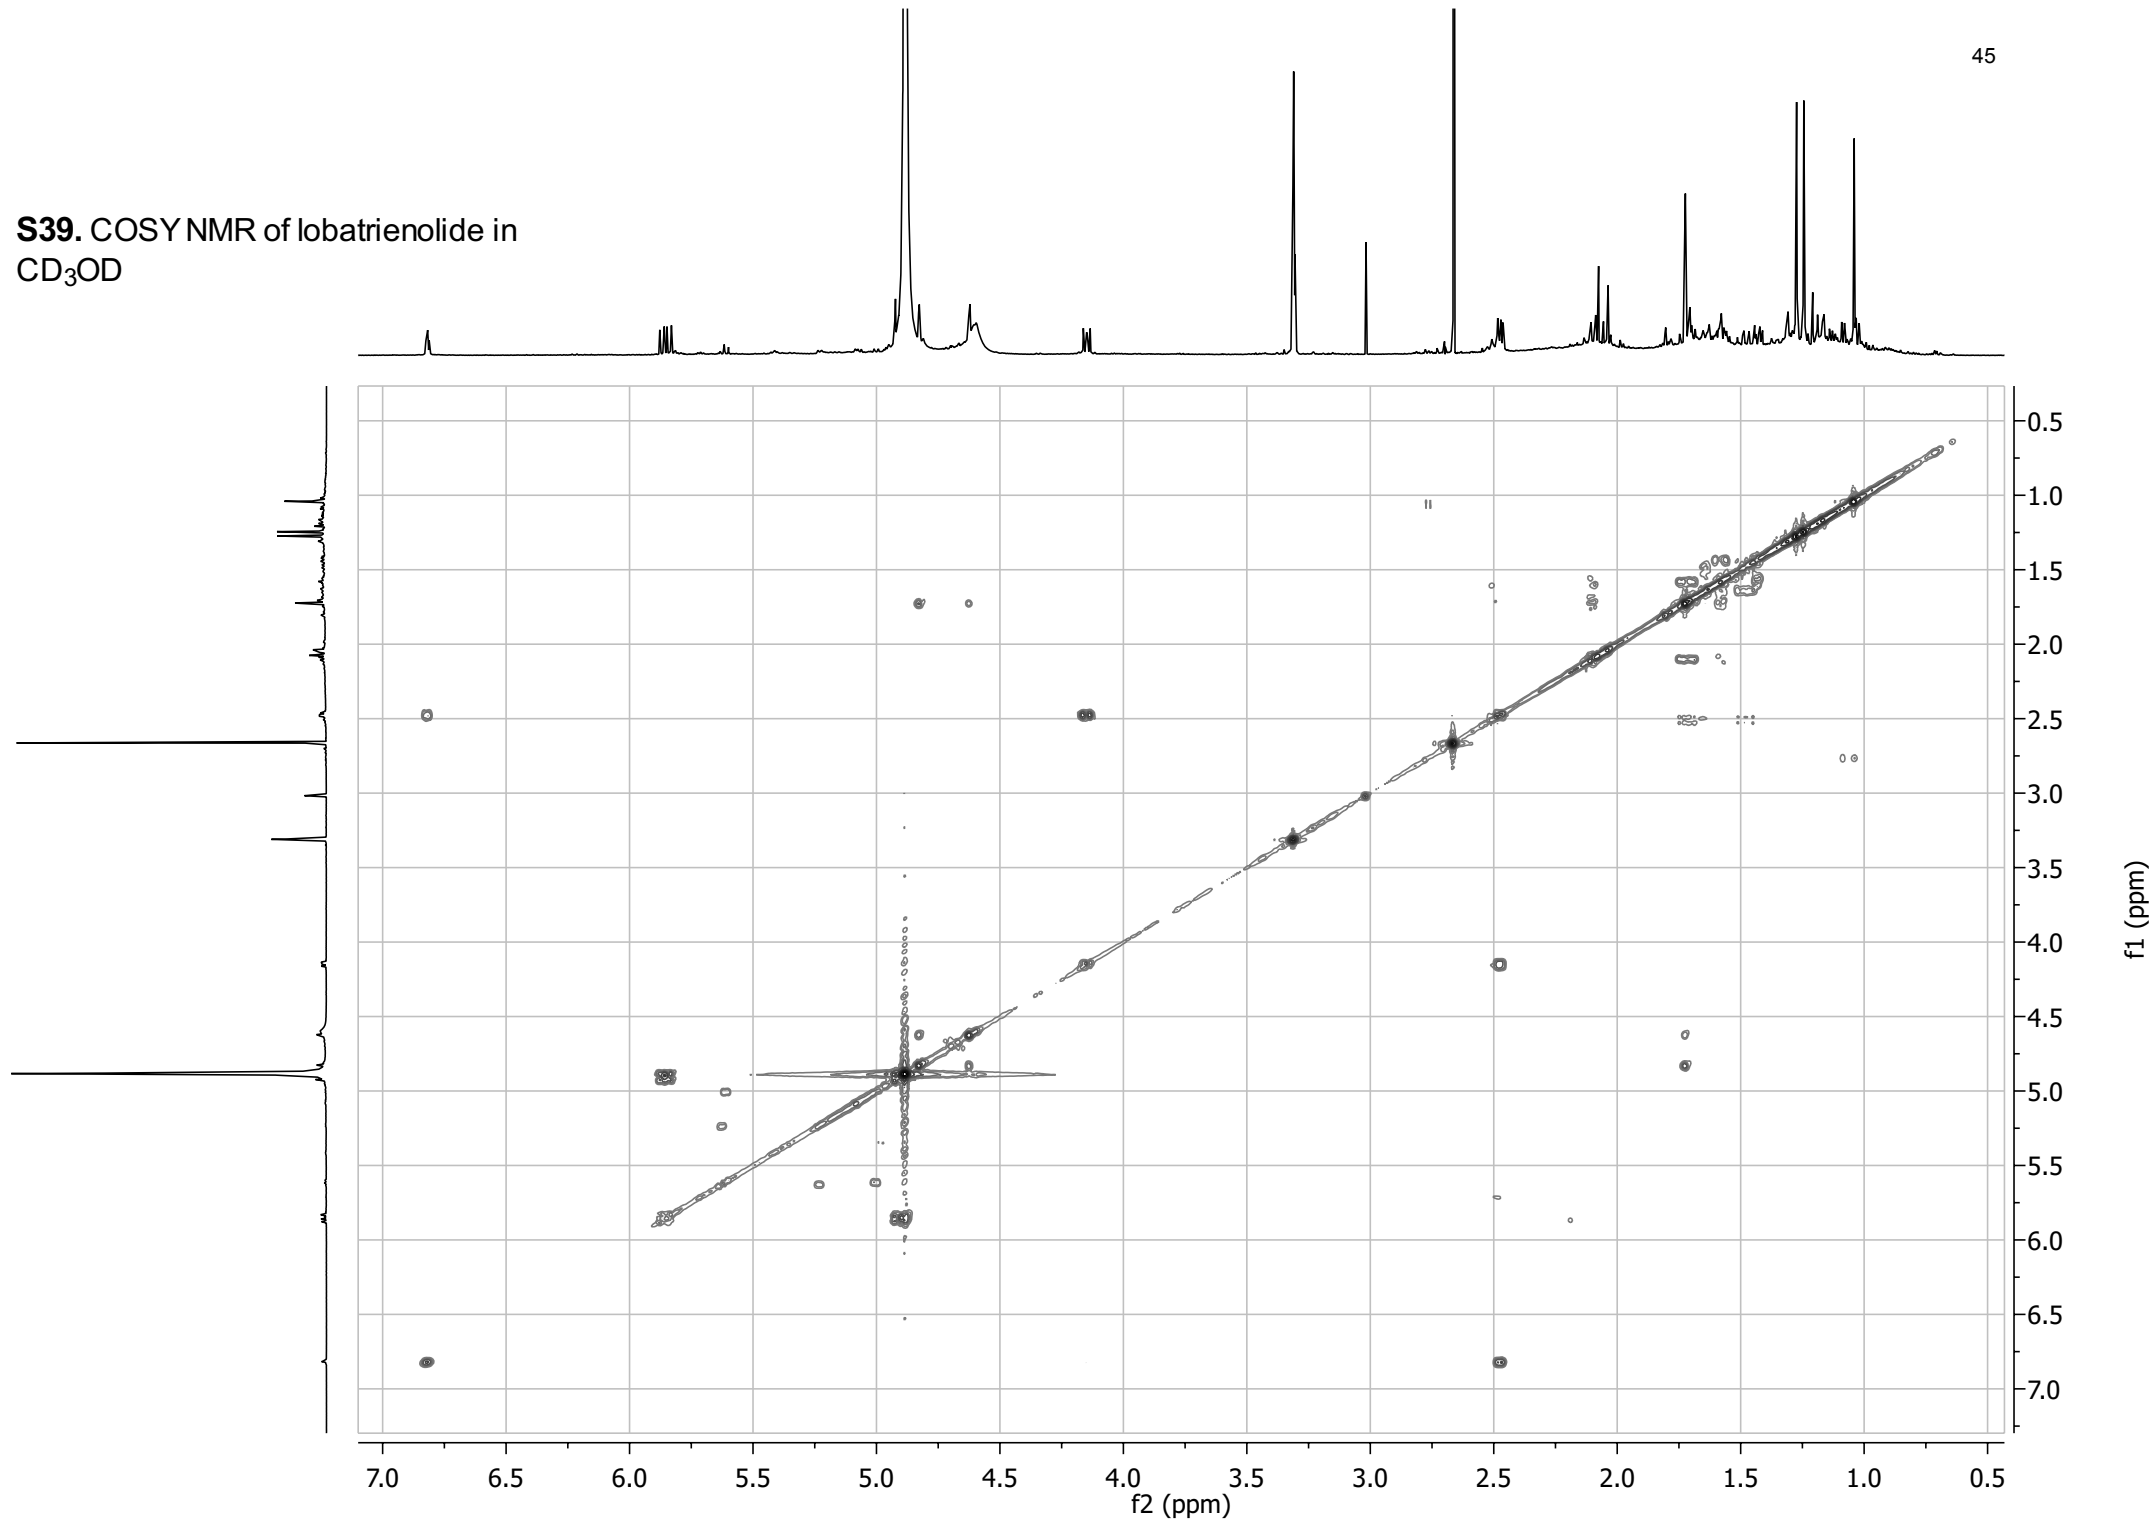

**S40.** HSQC NMR of lobatrienolide in  $\text{CD}_3\text{OD}$

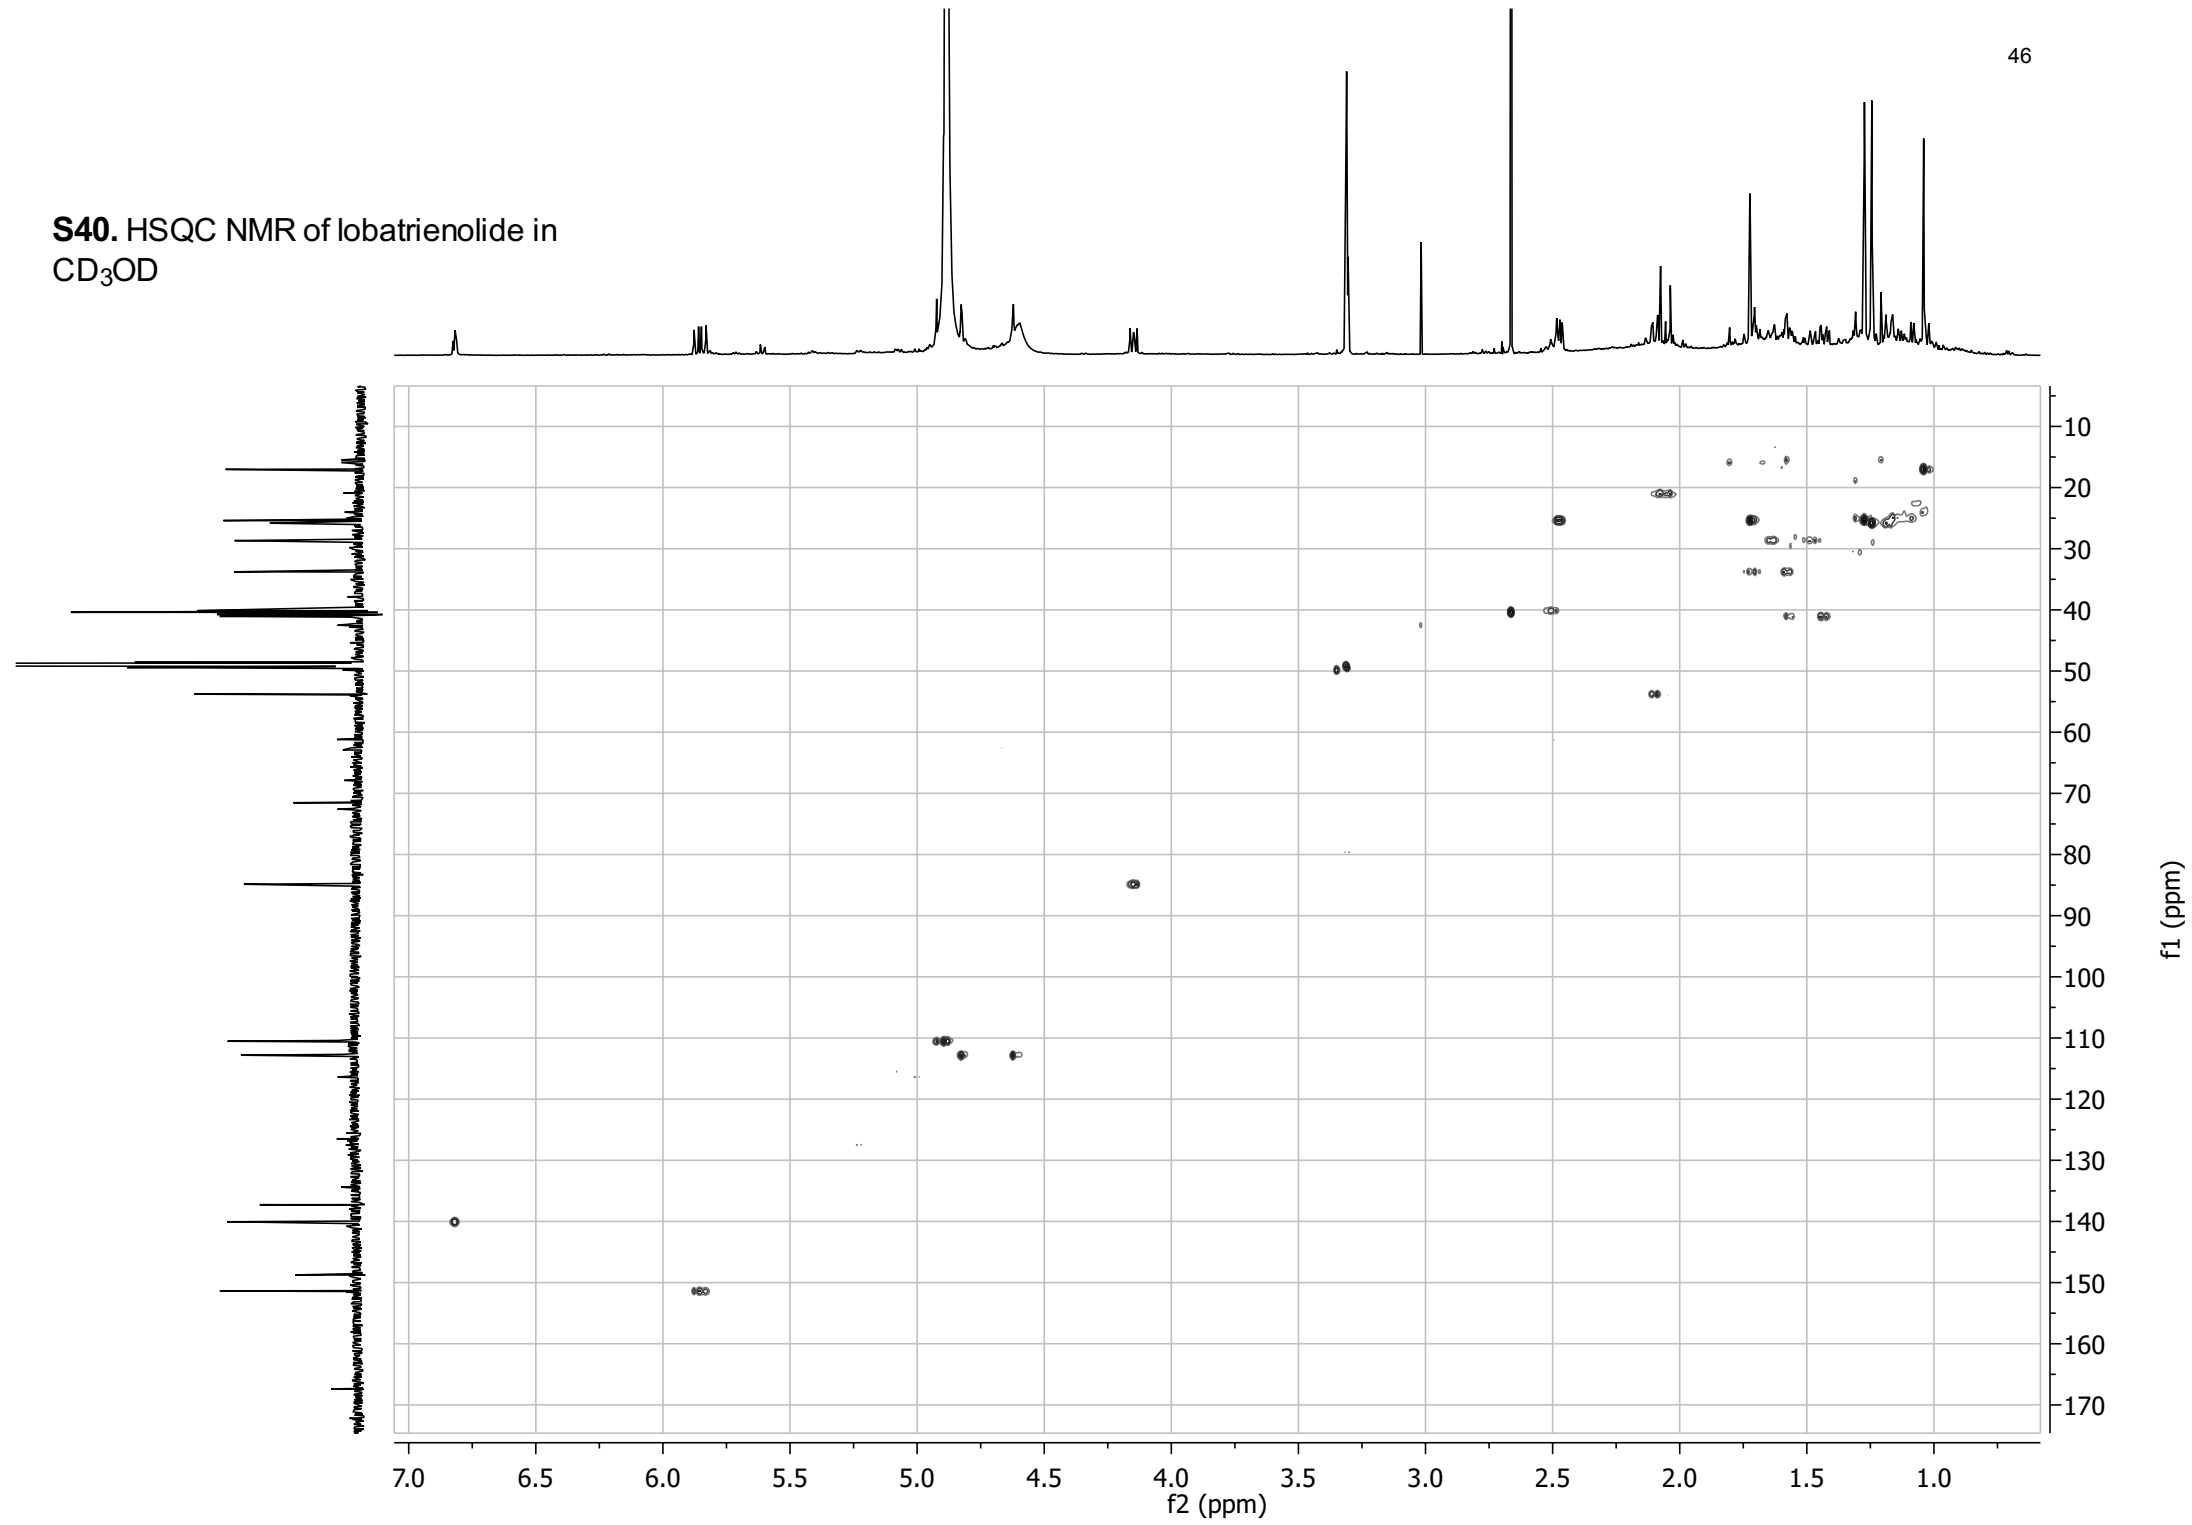

S41. HMBC NMR of lobatrienolide in  
CD<sub>3</sub>OD

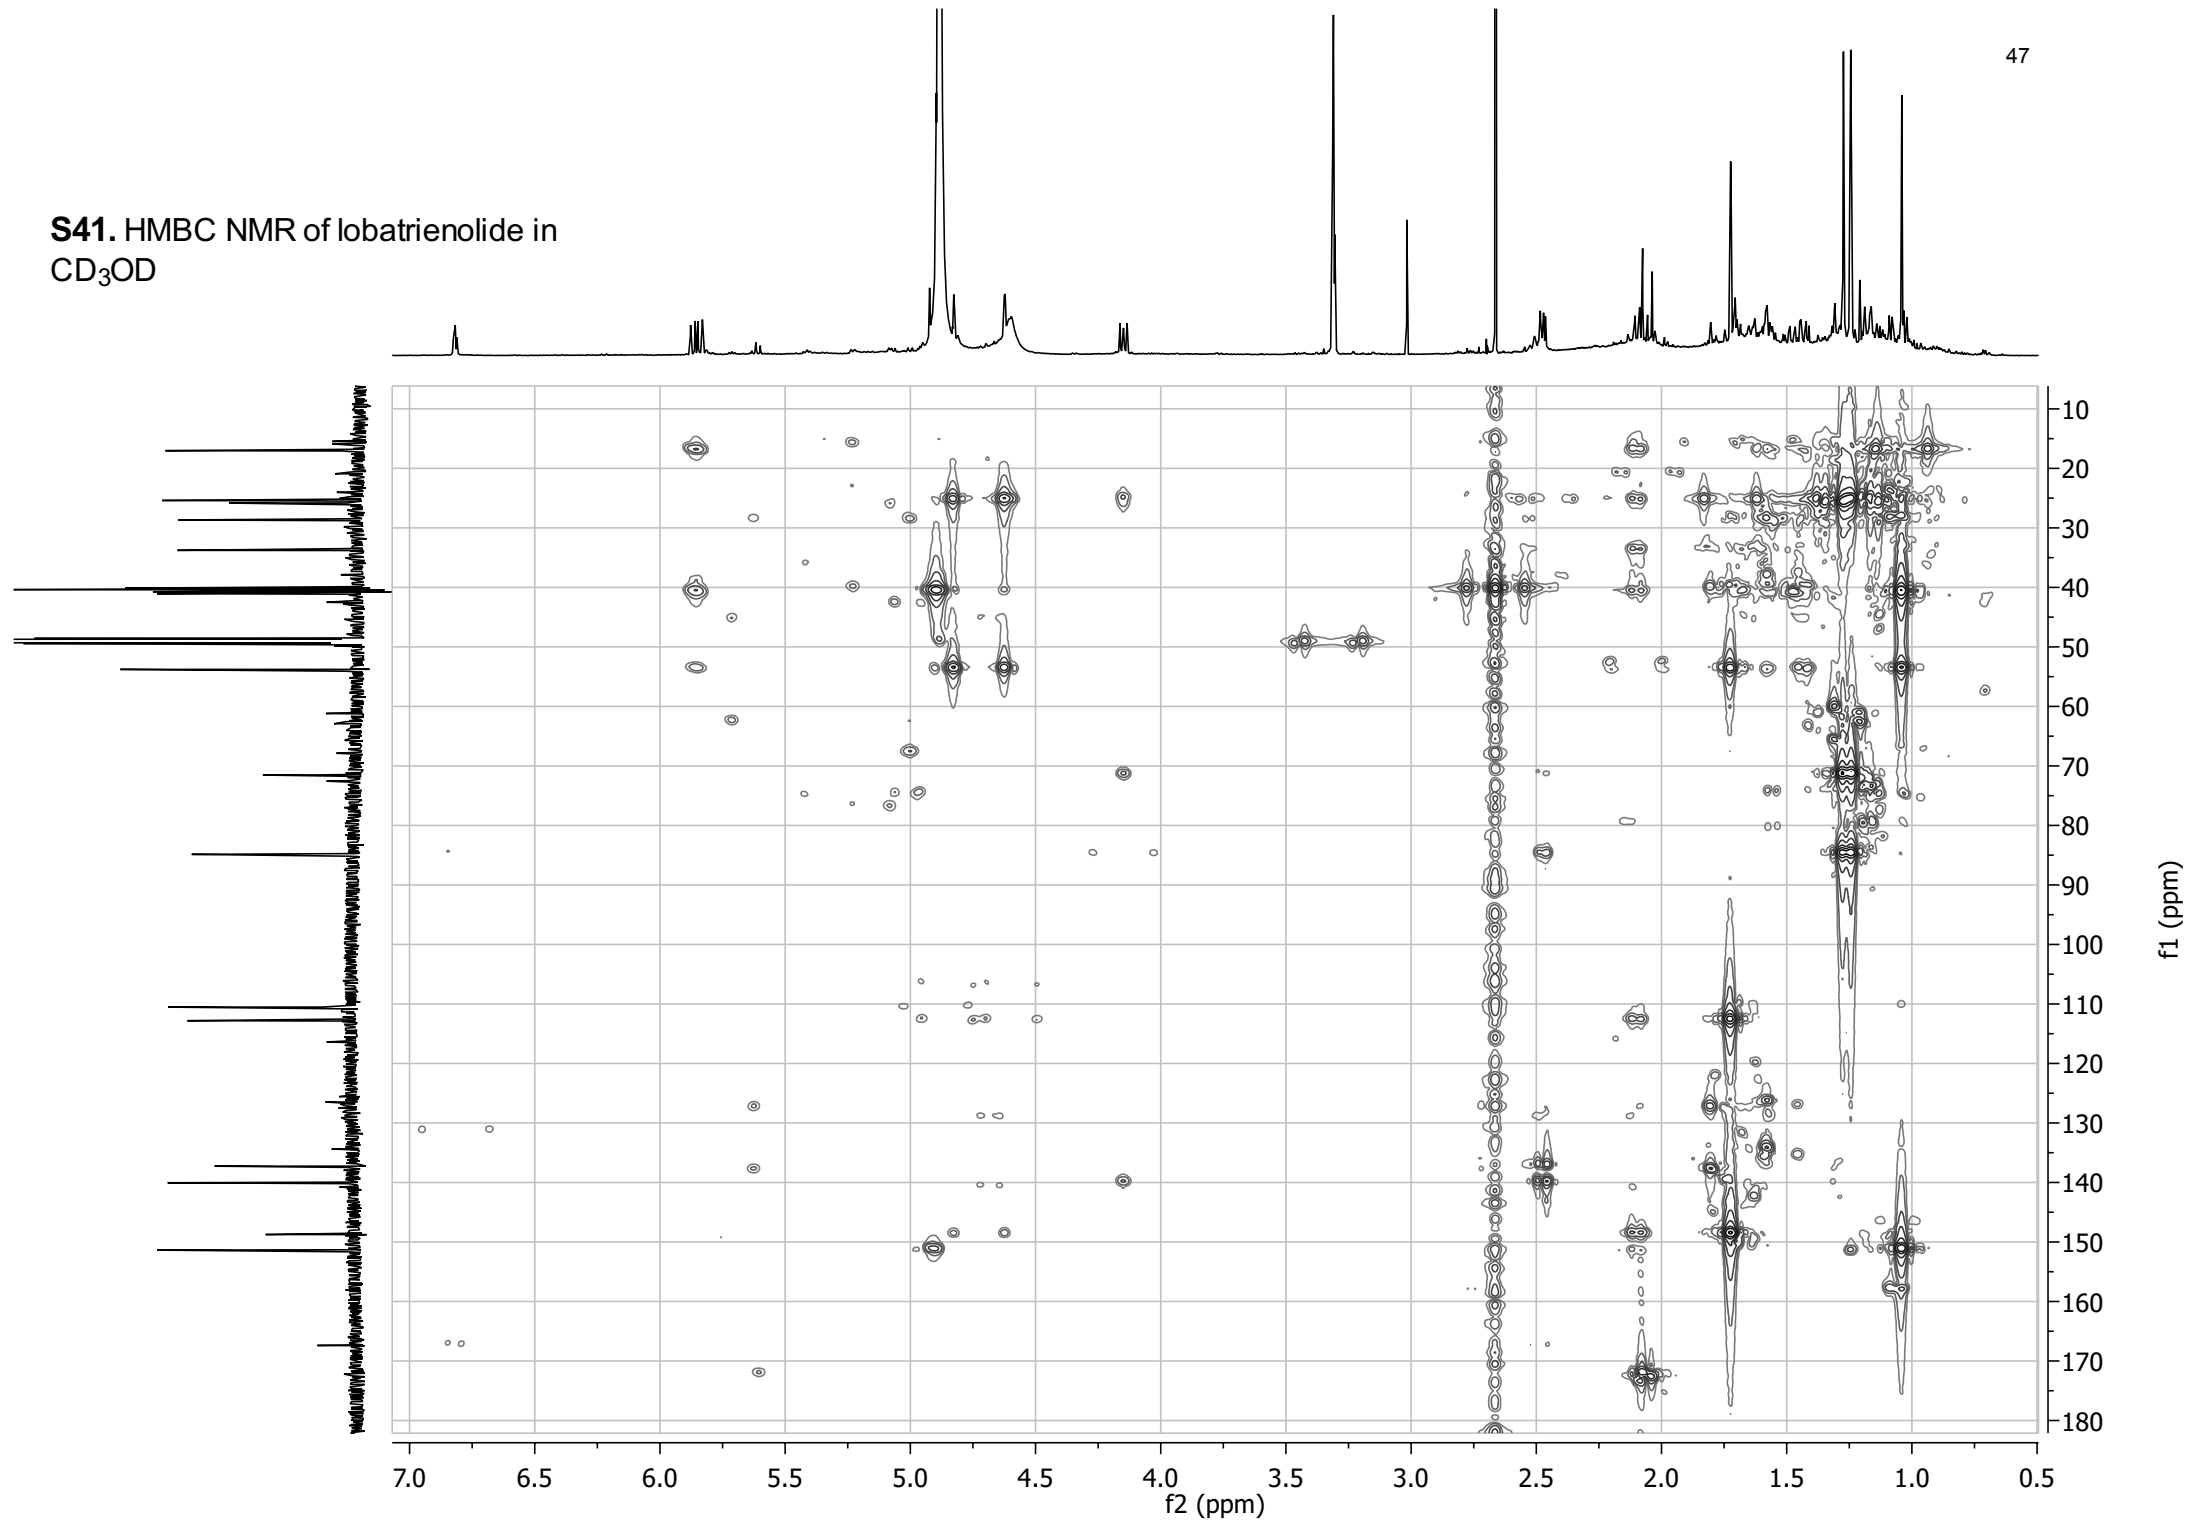

**Table S2.**  $^1\text{H}$  and  $^{13}\text{C}$  NMR data (300 MHz and 75 MHz,  $\text{CD}_3\text{OD}$ ) for lobatrienolide.

| No. | $^{13}\text{C}$<br>$\delta$ (m) | $^1\text{H}$<br>$\delta$ (m, J Hz) | COSY                                                                       | gHMBC                                   |
|-----|---------------------------------|------------------------------------|----------------------------------------------------------------------------|-----------------------------------------|
| 1   | 40.7 (s)                        |                                    |                                                                            |                                         |
| 2   | 53.8(d)                         | 2.10 (1H, dd, 3.5, 12.7)           | H <sub>a</sub> -3, H <sub>b</sub> -3                                       | C-1, C-3, C-7, C-10, C-11, C-12         |
| 3   | 33.8 (t)                        | 1.71 (1H, m)                       | H-2, H <sub>b</sub> -3, H4                                                 | C-1, C-2, C-10, C-11                    |
|     |                                 | 1.58 (1H, m)                       | H-2, H <sub>a</sub> -3, H-4                                                | C-1, C-2, C-4, C-5                      |
| 4   | 40.2 (d)                        | 2.51 (1H, m)                       | H <sub>a</sub> -3, H <sub>b</sub> -3, H <sub>a</sub> -5, H <sub>b</sub> -5 | C-13, C-14, C-15                        |
| 5   | 28.5 (t)                        | 1.60 (1H, m)                       | H4                                                                         | C-3, C-7                                |
|     |                                 | 1.48 (1H, m)                       | H-4                                                                        | C-1, C-4                                |
| 6   | 41.1 (t)                        | 1.57 (1H, m)                       | H <sub>b</sub> -6                                                          | C-1, C-2, C-4, C-5, C-7                 |
|     |                                 | 1.43 (1H, m)                       | H <sub>a</sub> -6                                                          | C-1, C-2, C-4, C-5, C-7                 |
| 7   | 17.1 (q)                        | 1.04 (3H, s)                       |                                                                            | C-1, C-2, C-5, C-8                      |
| 8   | 151.4 (d)                       | 5.85 (1H, dd, 10.8, 17.5)          | H-9                                                                        | C-1, C-2, C-7                           |
| 9   | 110.5 (t)                       | 4.92 (1H, dd, 1.4, 17.5)           | H-8                                                                        | C-1, C-2, C-8                           |
|     |                                 | 4.89 (1H, dd, 1.4, 10.8)           | H-8                                                                        | C-1, C-2, C-8                           |
| 10  | 148.8 (s)                       |                                    |                                                                            |                                         |
| 11  | 112.8 (t)                       | 4.83 (1H, dq, 1.5, 3.2)            | H <sub>b</sub> -11, H <sub>3</sub> -12                                     | C-1, C-2, C-10, C-12                    |
|     |                                 | 4.62 (1H, m)                       | H <sub>a</sub> -11, H <sub>3</sub> -12                                     | C-1, C-2, C-10, C-12                    |
| 12  | 25.3 (q)                        | 1.72 (3H, brdd, 0.8, 1.5)          | H <sub>a</sub> -11, H <sub>b</sub> -11                                     | C-1, C-2, C-10, C-11                    |
| 13  | 137.3 (s)                       |                                    |                                                                            |                                         |
| 14  | 167.4 (s)                       |                                    |                                                                            |                                         |
| 15  | 140.1 (d)                       | 6.82 (1H, ddd, 0.9, 3.6, 4.5)      | H-16                                                                       | C-4, C-14, C-16, C-17                   |
| 16  | 25.5 (t)                        | 2.48 (2H, m)                       | H-15, H-17                                                                 | C-4, C-13, C-15, C-17, C-18, C-19, C-20 |
| 17  | 84.9 (d)                        | 4.15 (1H, m)                       | H-16                                                                       | C-14, C-15, C-18, C-19, C-20            |
| 18  | 71.5 (s)                        |                                    |                                                                            |                                         |
| 19  | 25.9 (q)                        | 1.24 (3H, s)                       |                                                                            | C-17, C-18, C20                         |
| 20  | 25.4 (q)                        | 1.27 (3H, s)                       |                                                                            | C-17, C-18, C-19                        |



**S42.**  $^1\text{H}$  NMR of lobatrienriol in  $\text{CD}_3\text{OD}$

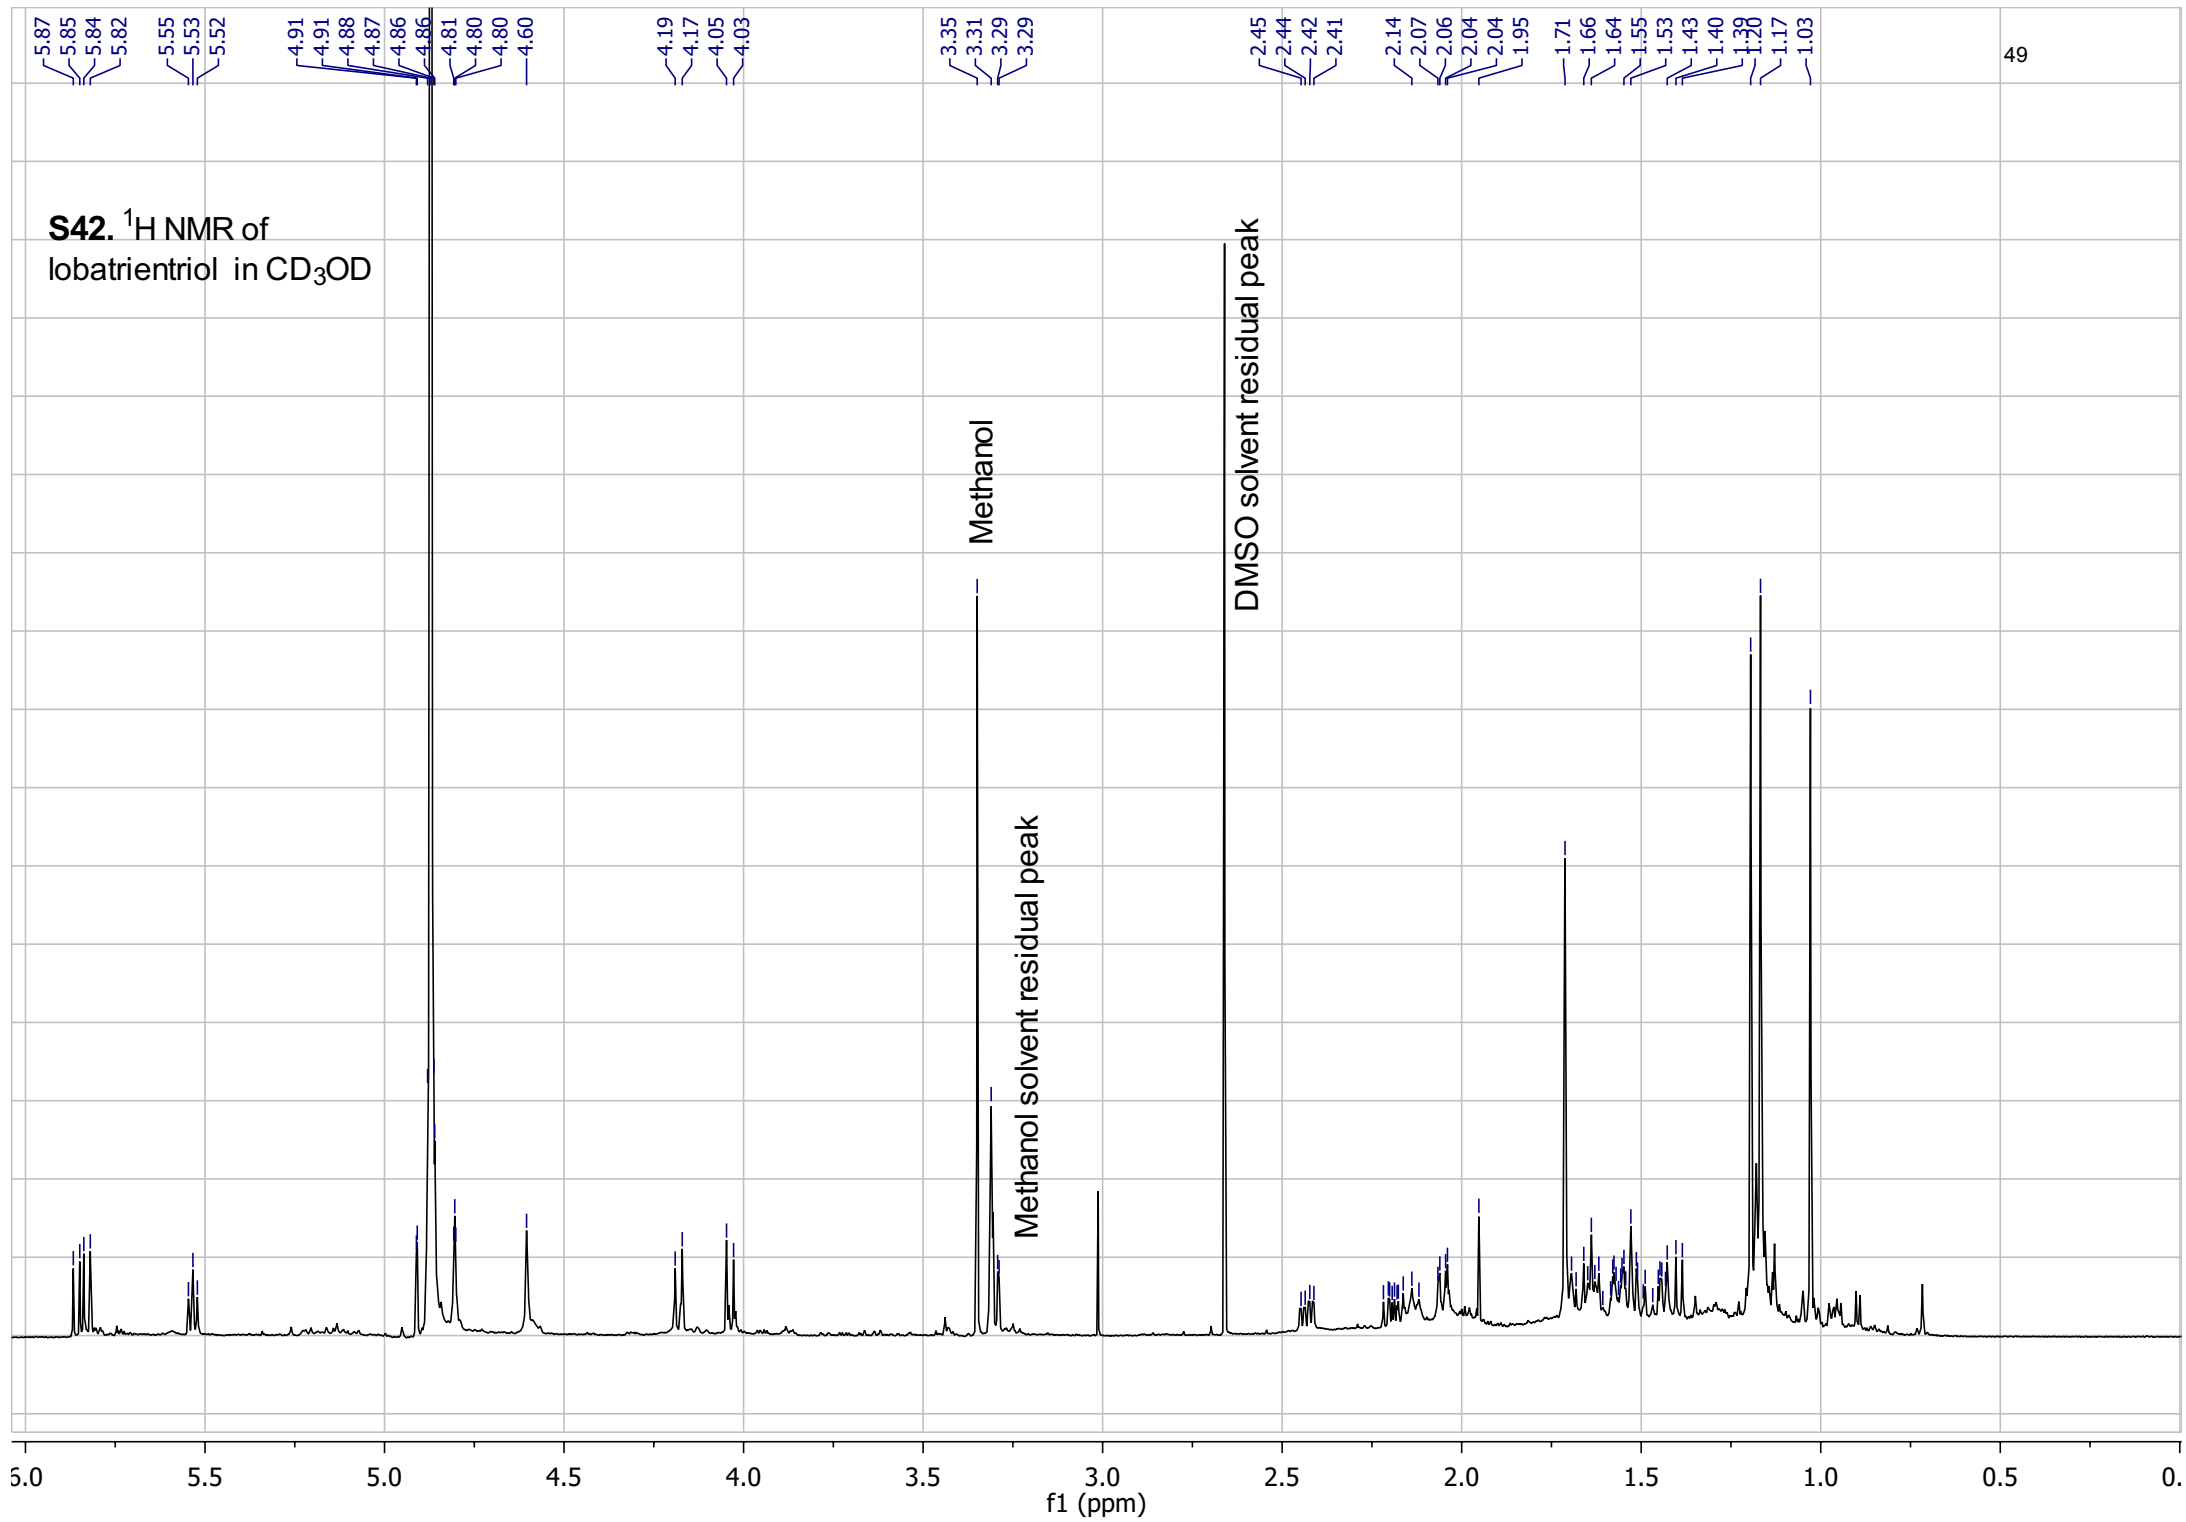

**S43.**  $^{13}\text{C}$  NMR of lobatrienriol in  $\text{CD}_3\text{OD}$

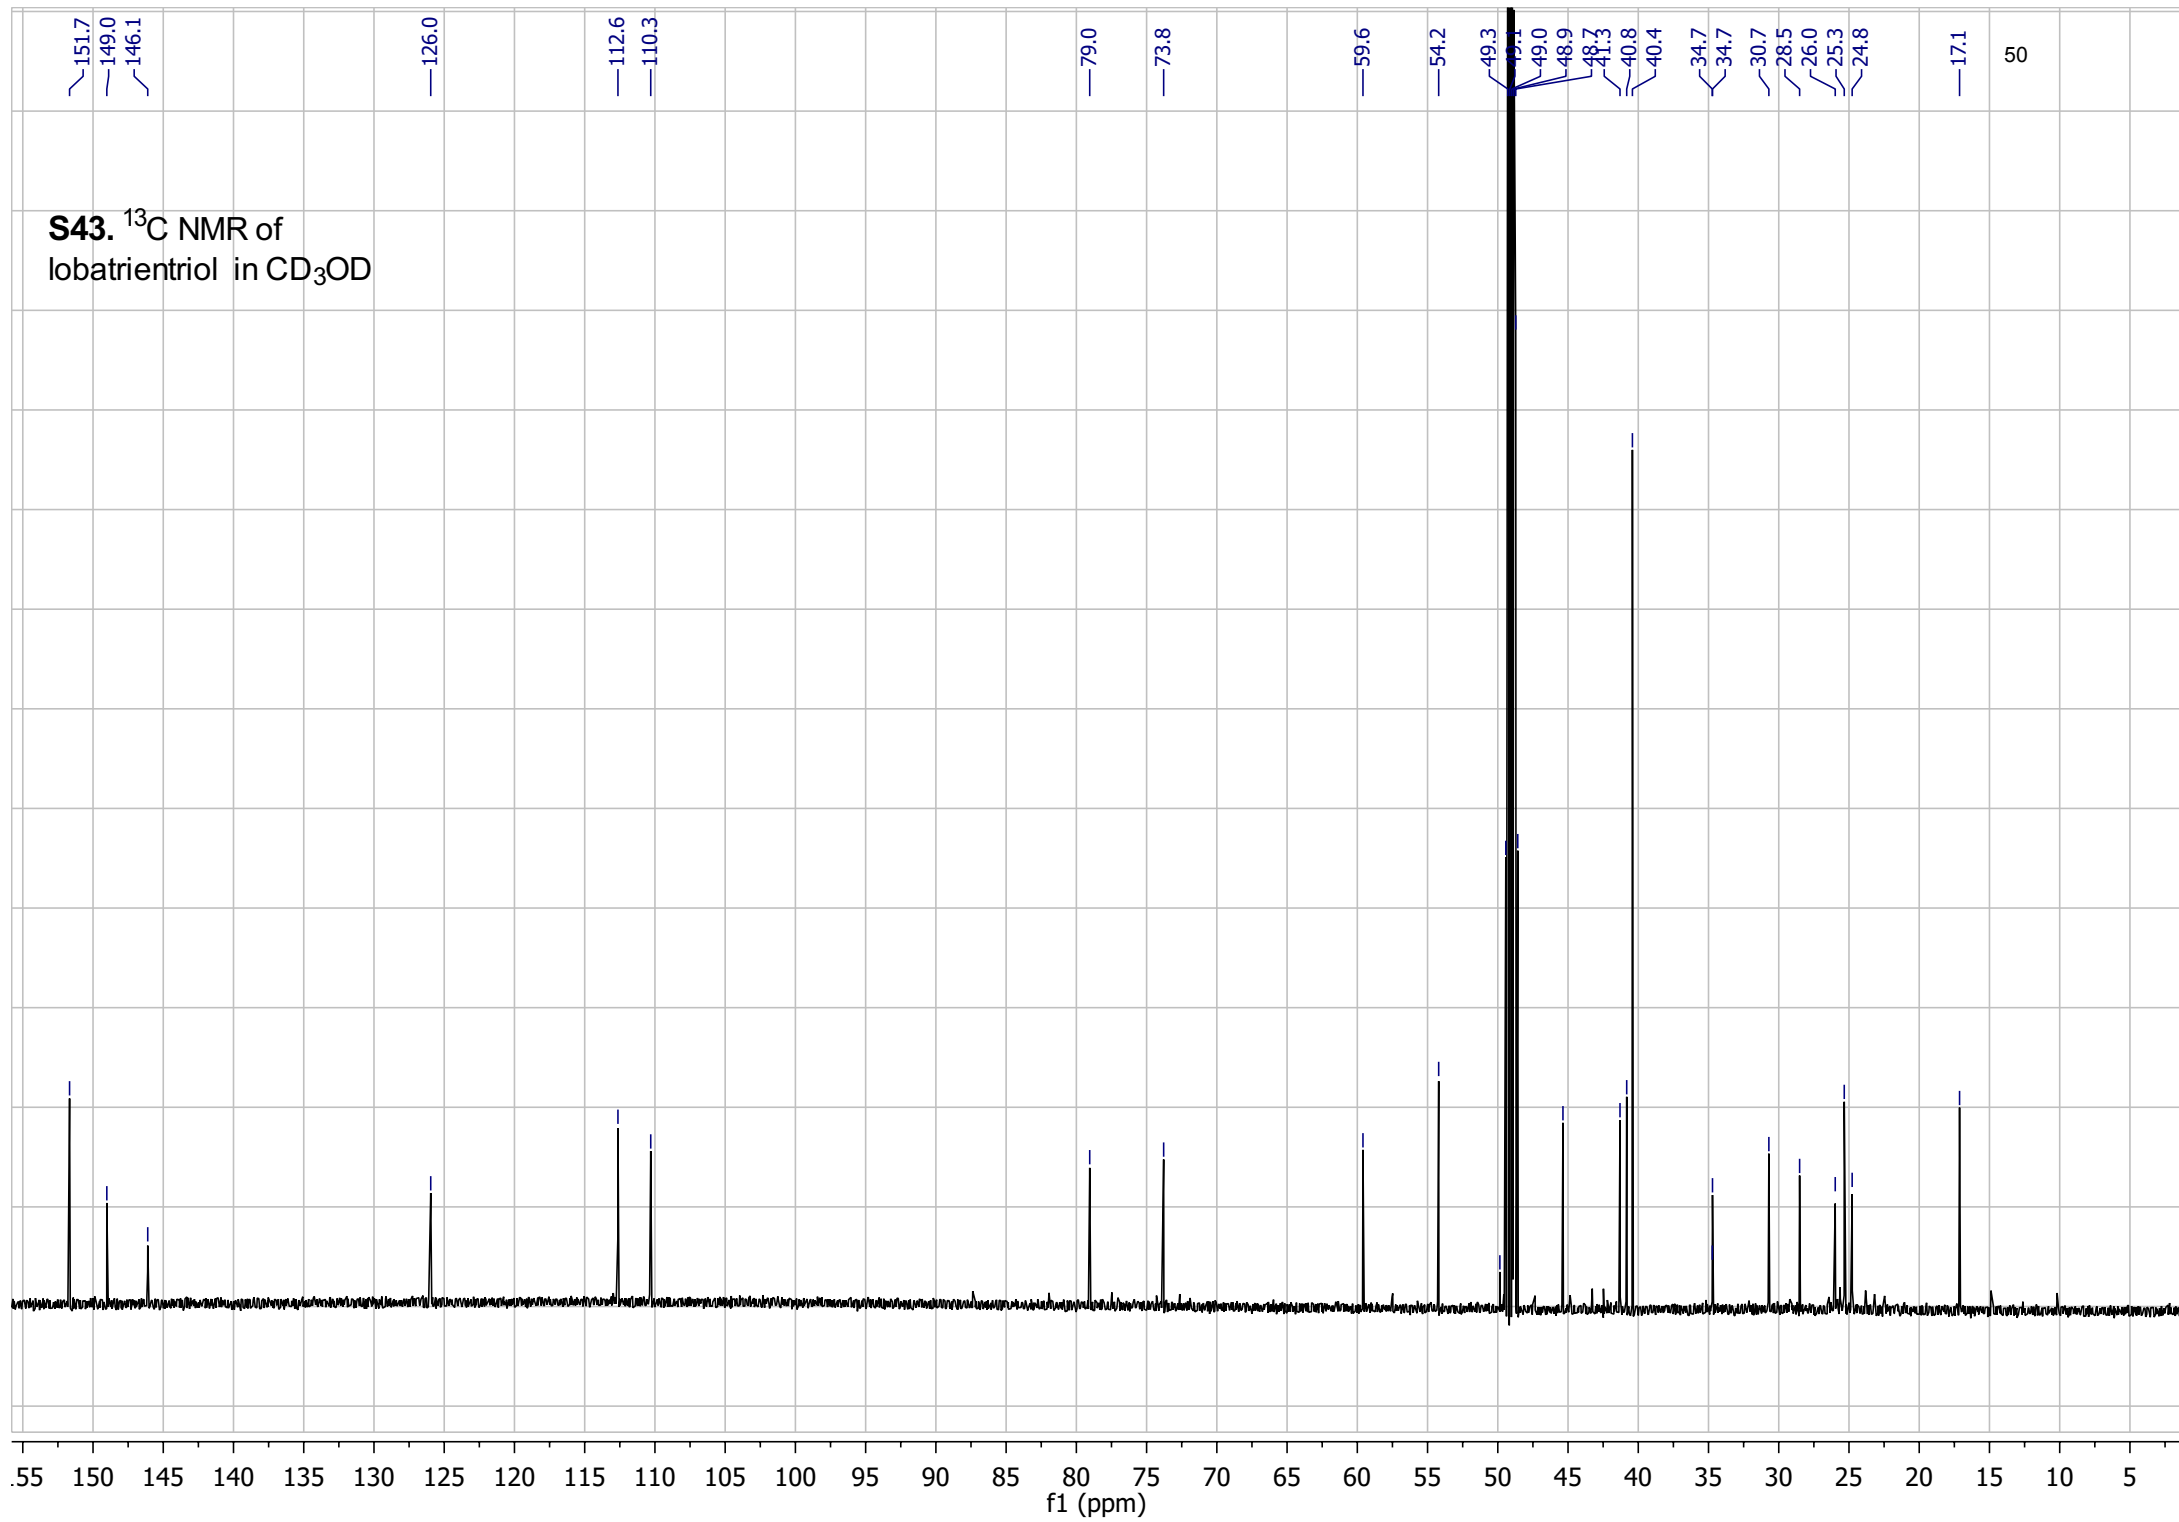

S44. COSY NMR of lobatrienol in CD<sub>3</sub>OD

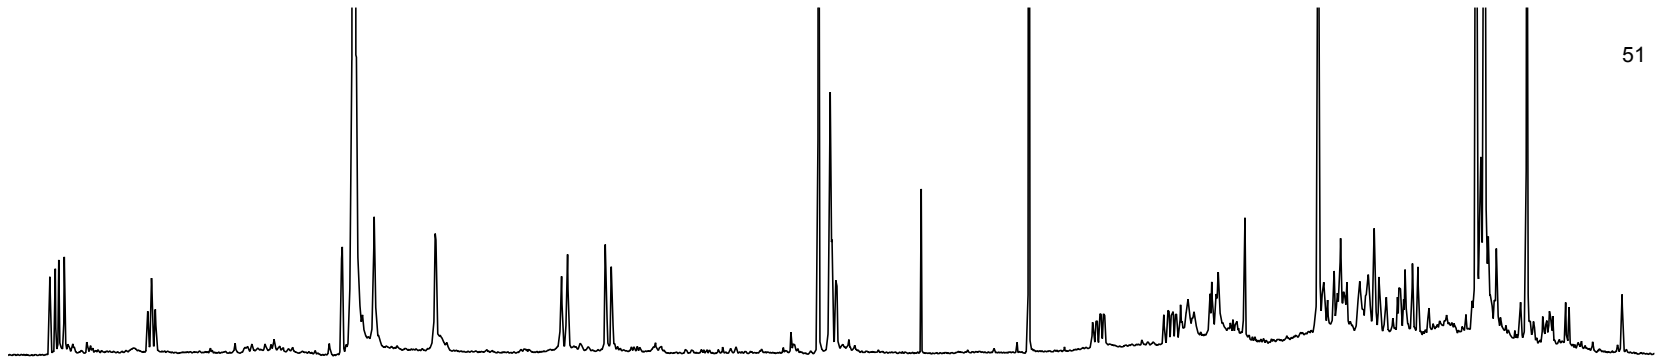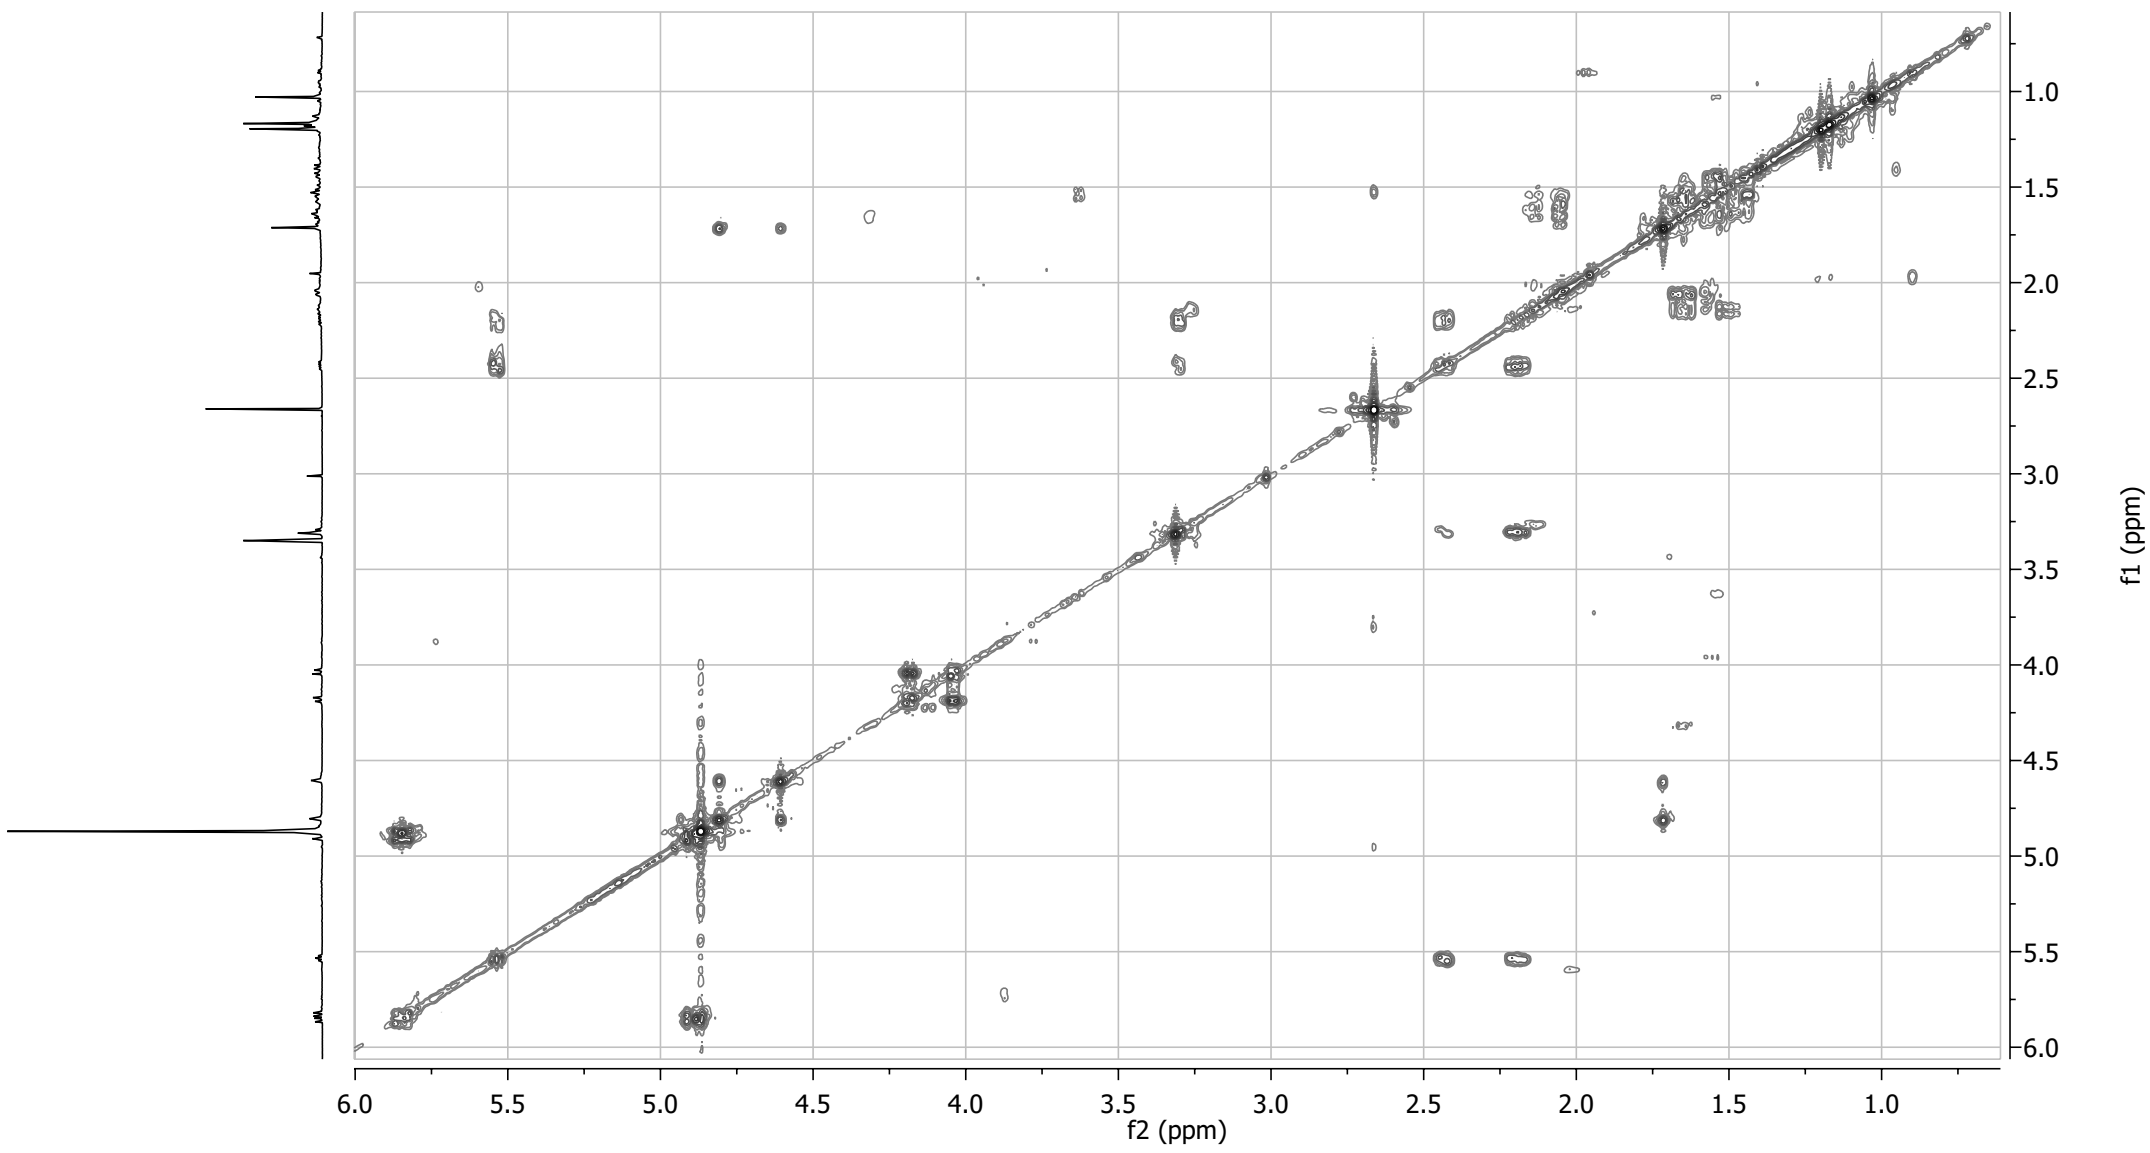

S45. HSQC NMR of lobatrienol in CD<sub>3</sub>OD

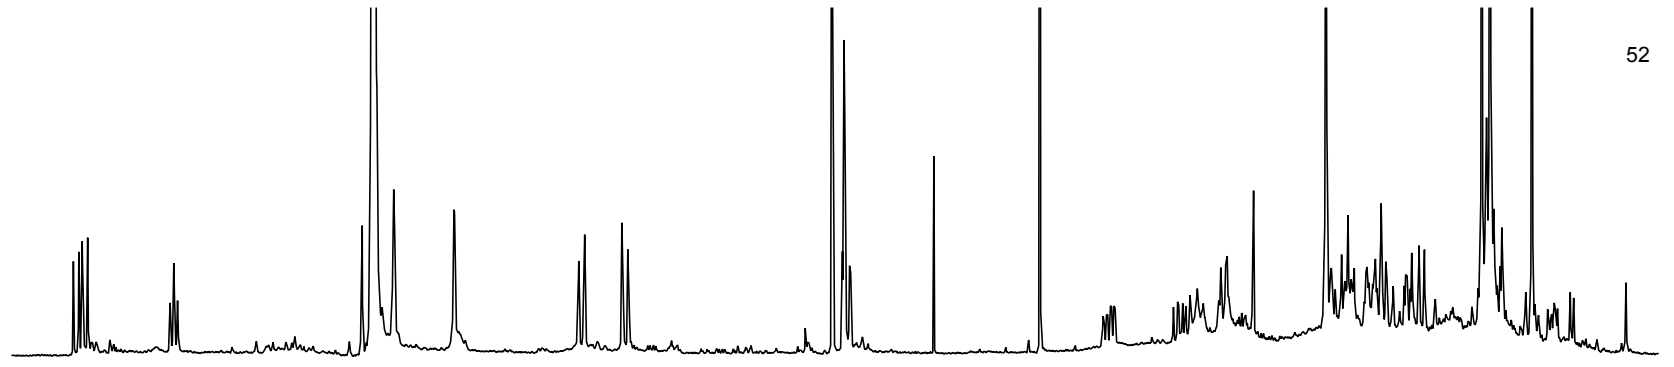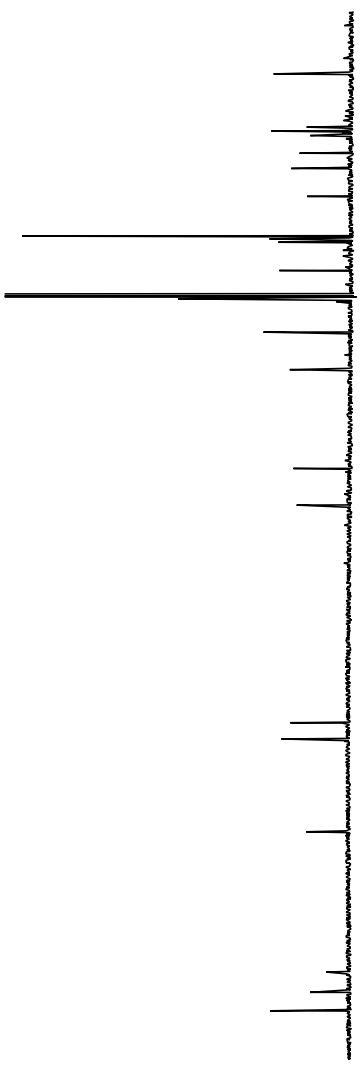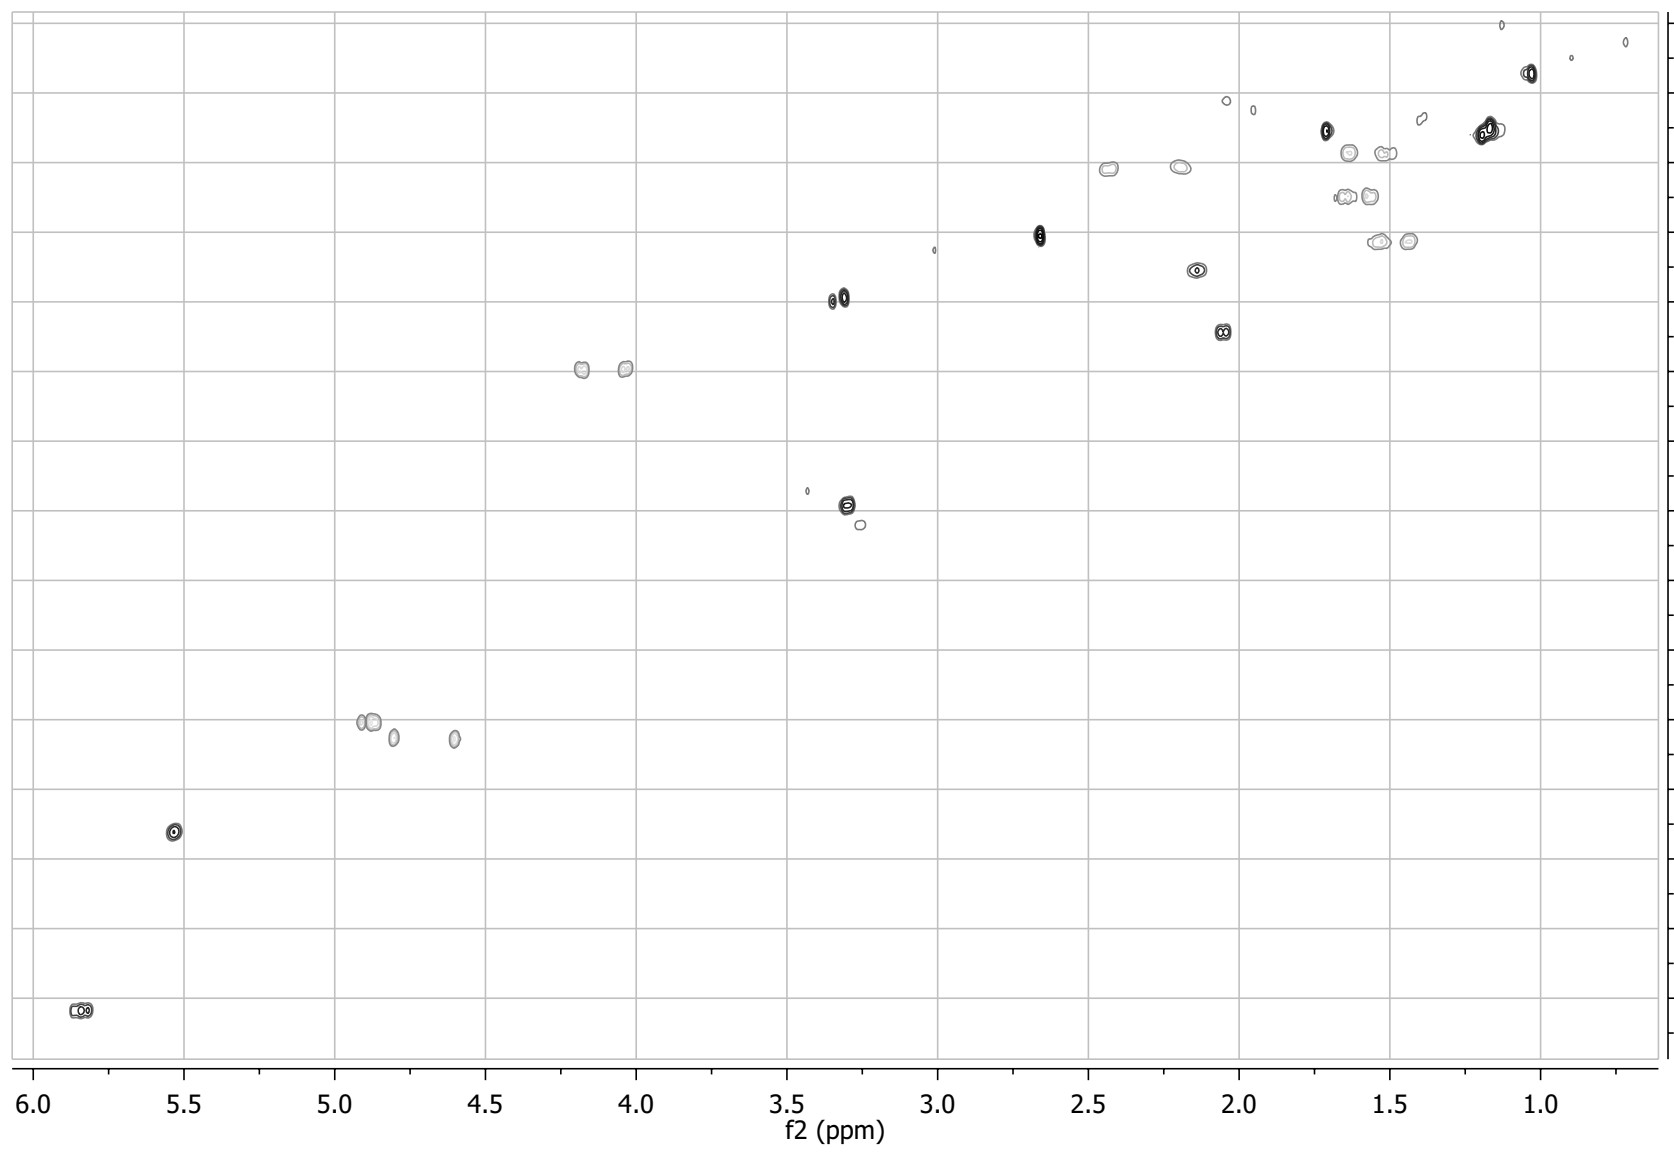

f1 (ppm)

f2 (ppm)

S46. HMBC NMR of lobatrienriol in CD<sub>3</sub>OD

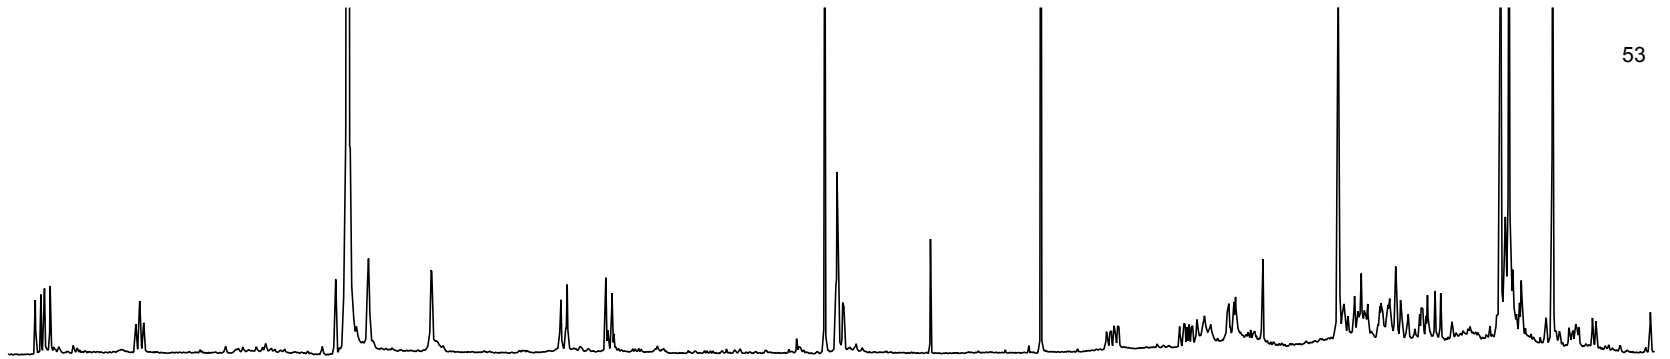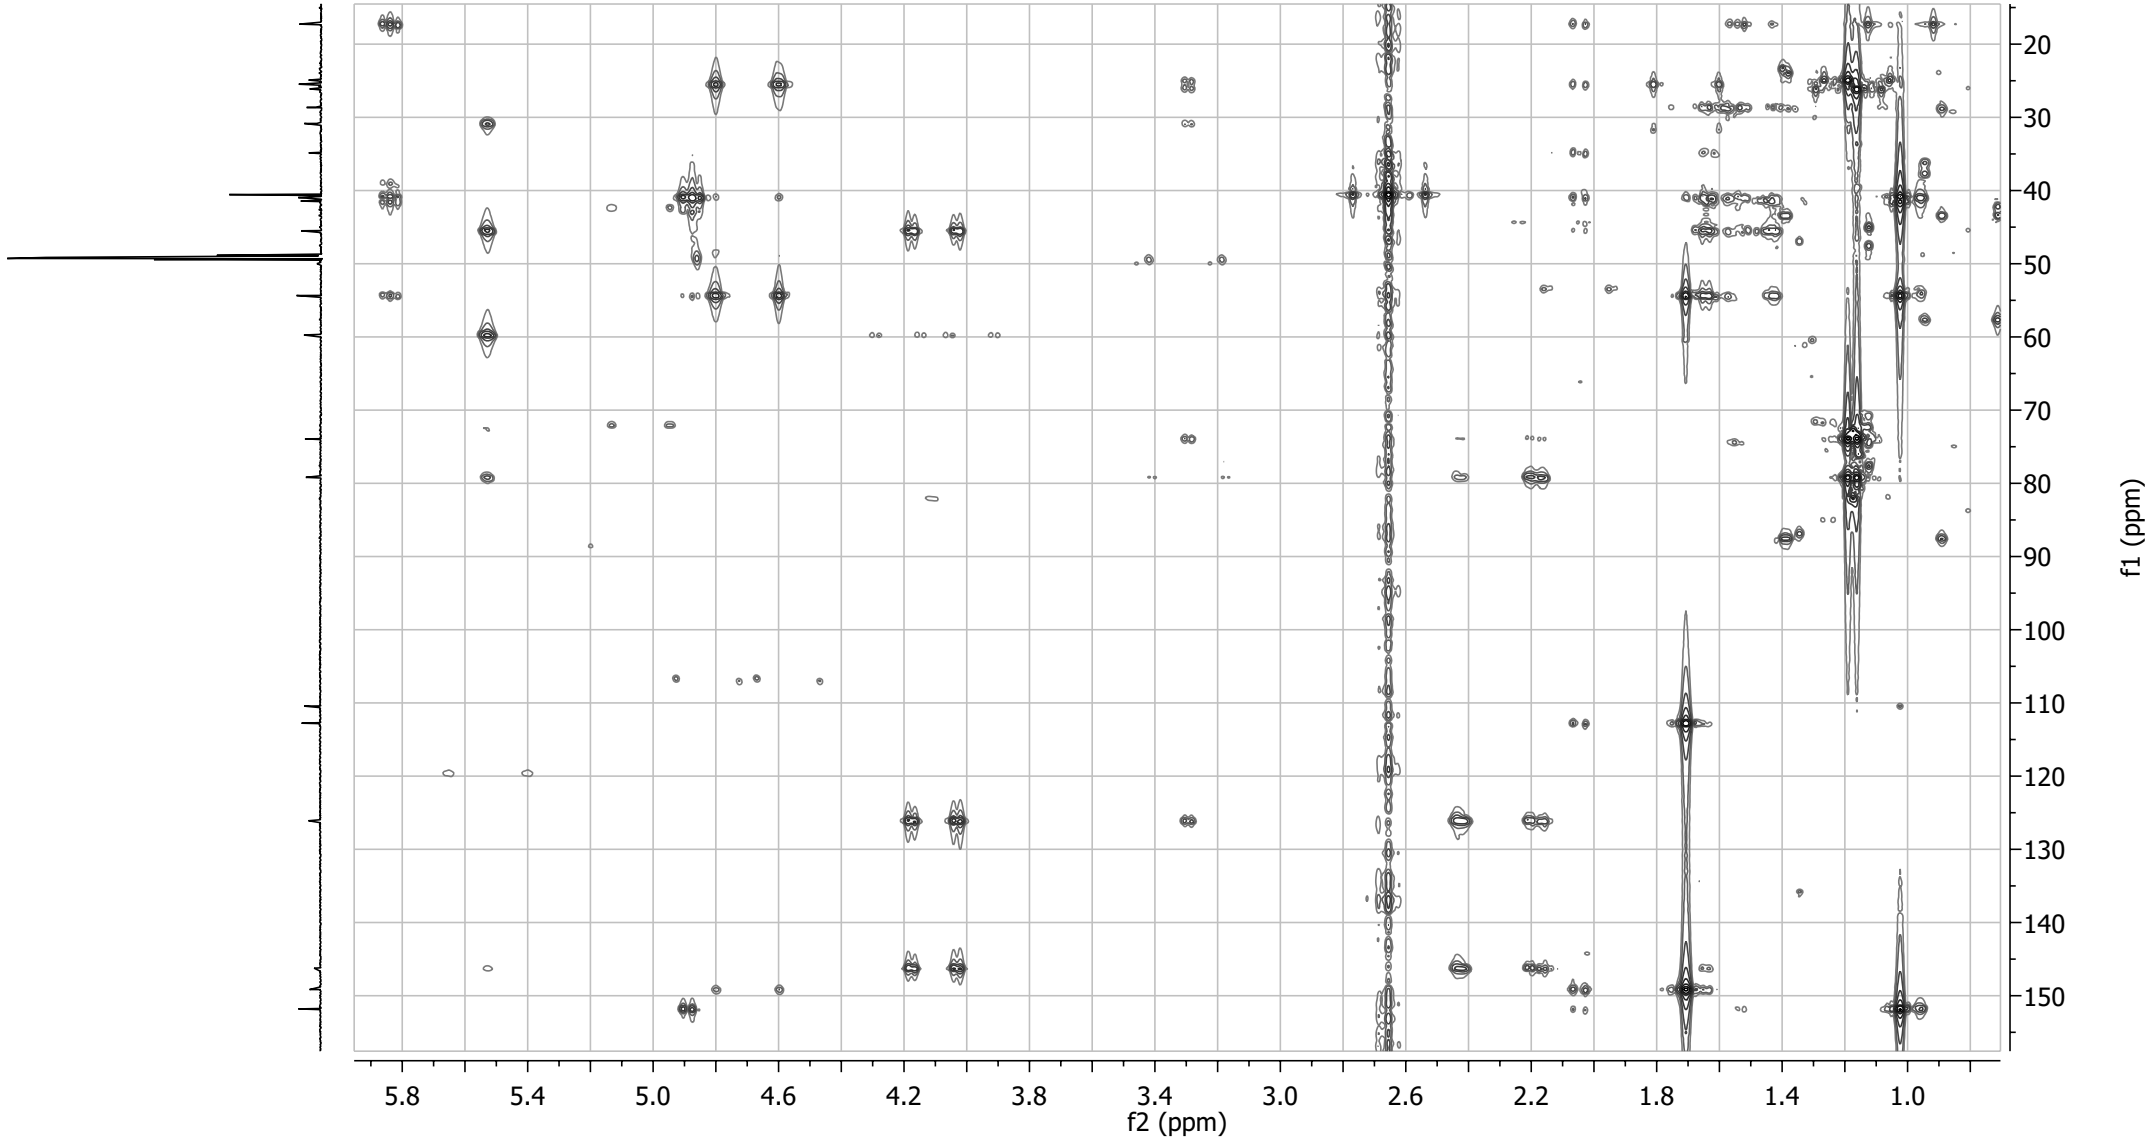

**Table S3.**  $^1\text{H}$  and  $^{13}\text{C}$  NMR data (300 MHz and 75 MHz,  $\text{CD}_3\text{OD}$ ) for lobatrientriol.

| <b>o.</b> | <b><math>^{13}\text{C}</math><br/><math>\delta</math> (m)</b> | <b><math>^1\text{H}</math><br/><math>\delta</math> (m, J Hz)</b> | <b>COSY</b>                                                                | <b>gHMBC</b>                              |
|-----------|---------------------------------------------------------------|------------------------------------------------------------------|----------------------------------------------------------------------------|-------------------------------------------|
| 1         | 40.8 (s)                                                      |                                                                  |                                                                            |                                           |
| 2         | 54.2(d)                                                       | 2.05 (1H, dd, 3.1, 12.8)                                         | H <sub>a</sub> -3, H <sub>b</sub> -3                                       | C-1, C-3, C-4, C-7, C-8, C-10, C-11, C-12 |
| 3         | 34.7 (t)                                                      | 1.65 (1H, m)                                                     | H-2, H-4                                                                   | C-1, C-2, C-4, C-5                        |
|           |                                                               | 1.57 (1H, m)                                                     | H-2, H-4                                                                   | C-1, C-2, C-4, C-5                        |
| 4         | 45.4 (d)                                                      | 2.14 (1H, m)                                                     | H <sub>a</sub> -3, H <sub>b</sub> -3, H <sub>a</sub> -5, H <sub>b</sub> -5 | C-2, C-3, C-5, C-13, C-14, C-15           |
| 5         | 28.5 (t)                                                      | 1.64 (1H, m)                                                     | H-4, H <sub>b</sub> -5, H <sub>b</sub> -6                                  | C-1, C-2, C-4                             |
|           |                                                               | 1.52 (1H, m)                                                     | H-4, H <sub>a</sub> -5, H <sub>b</sub> -6                                  | C-1, C-4                                  |
| 6         | 41.3 (t)                                                      | 1.53 (1H, m)                                                     | H <sub>a</sub> -5, H <sub>b</sub> -6                                       | C-1, C-4, C-5, C-7                        |
|           |                                                               | 1.45 (1H, m)                                                     | H <sub>a</sub> -5, H <sub>b</sub> -5, H <sub>a</sub> -6                    | C-1, C-2, C-4, C-7                        |
| 7         | 17.1 (q)                                                      | 1.03 (3H, s)                                                     |                                                                            | C-1, C-2, C-6, C-8, C-9                   |
| 8         | 151.7 (d)                                                     | 5.84 (1H, dd, 10.8, 17.6)                                        | H <sub>a</sub> -9, H <sub>b</sub> -9                                       | C-1, C-2, C-6, C-7                        |
| 9         | 110.3 (t)                                                     | 4.91 (1H, d, 1.4, 17.6)                                          | H-8, H <sub>b</sub> -9                                                     | C-1, C-2, C-8                             |
|           |                                                               | 4.87 (1H, 1.4, 10.8)                                             | H-8, H <sub>b</sub> -9                                                     | C-1, C-2, C-8                             |
| 10        | 149.0 (s)                                                     |                                                                  |                                                                            |                                           |
| 11        | 112.6 (t)                                                     | 4.81 (1H, dq, 1.4, 3.2)                                          | H <sub>b</sub> -11, H <sub>3</sub> -12                                     | C-1, C-2, C-10, C-12                      |
|           |                                                               | 4.60 (1H, brs)                                                   | H <sub>a</sub> -11, H <sub>3</sub> -12                                     | C-1, C-2, C-10, C-12                      |
| 12        | 25.3 (q)                                                      | 1.71 (3H, brs)                                                   | H <sub>a</sub> -11, H <sub>b</sub> -11                                     | C-1, C-2, C-10, C-11                      |
| 13        | 146.1 (s)                                                     |                                                                  |                                                                            |                                           |
| 14        | 59.6 (t)                                                      | 4.18 (1H, d, 11.8)                                               | H <sub>b</sub> -14, H-15                                                   | C-4, C-13, C-15                           |
|           |                                                               | 4.04 (1H, d, 11.8)                                               | H <sub>a</sub> -14                                                         | C-4, C-13, C-15                           |
| 15        | 126.0(d)                                                      | 5.53 (1H, brdd, 7.3, 8.2)                                        | H <sub>a</sub> -14, H <sub>a</sub> -16, H <sub>b</sub> -16                 | C-4, C-13, C-14, C-16, C-17               |
| 16        | 30.7(t)                                                       | 2.43 (1H, ddd, 2.3, 7.3, 14.6)                                   | H-15, H <sub>b</sub> -16, H-17                                             | C-13, C-15, C-17, C-18                    |
|           |                                                               | 2.19 (1H, ddd, 8.2, 10.3, 14.6)                                  | H-15, H <sub>a</sub> -16, H-17                                             | C-13, C-15, C-17, C-18                    |
| 17        | 79.1 (d)                                                      | 3.29 (1H, brd, 2.3)                                              | H <sub>a</sub> -16, H <sub>b</sub> -16                                     | C-15, C-16, C-18, C-19, C-20              |
| 18        | 73.8 (s)                                                      |                                                                  |                                                                            |                                           |
| 19        | 24.8 (q)                                                      | 1.17 (3H, s)                                                     |                                                                            | C-17, C-18, C-20                          |
| 20        | 26.0(q)                                                       | 1.20 (3H, s)                                                     |                                                                            | C-17, C-18, C-19                          |

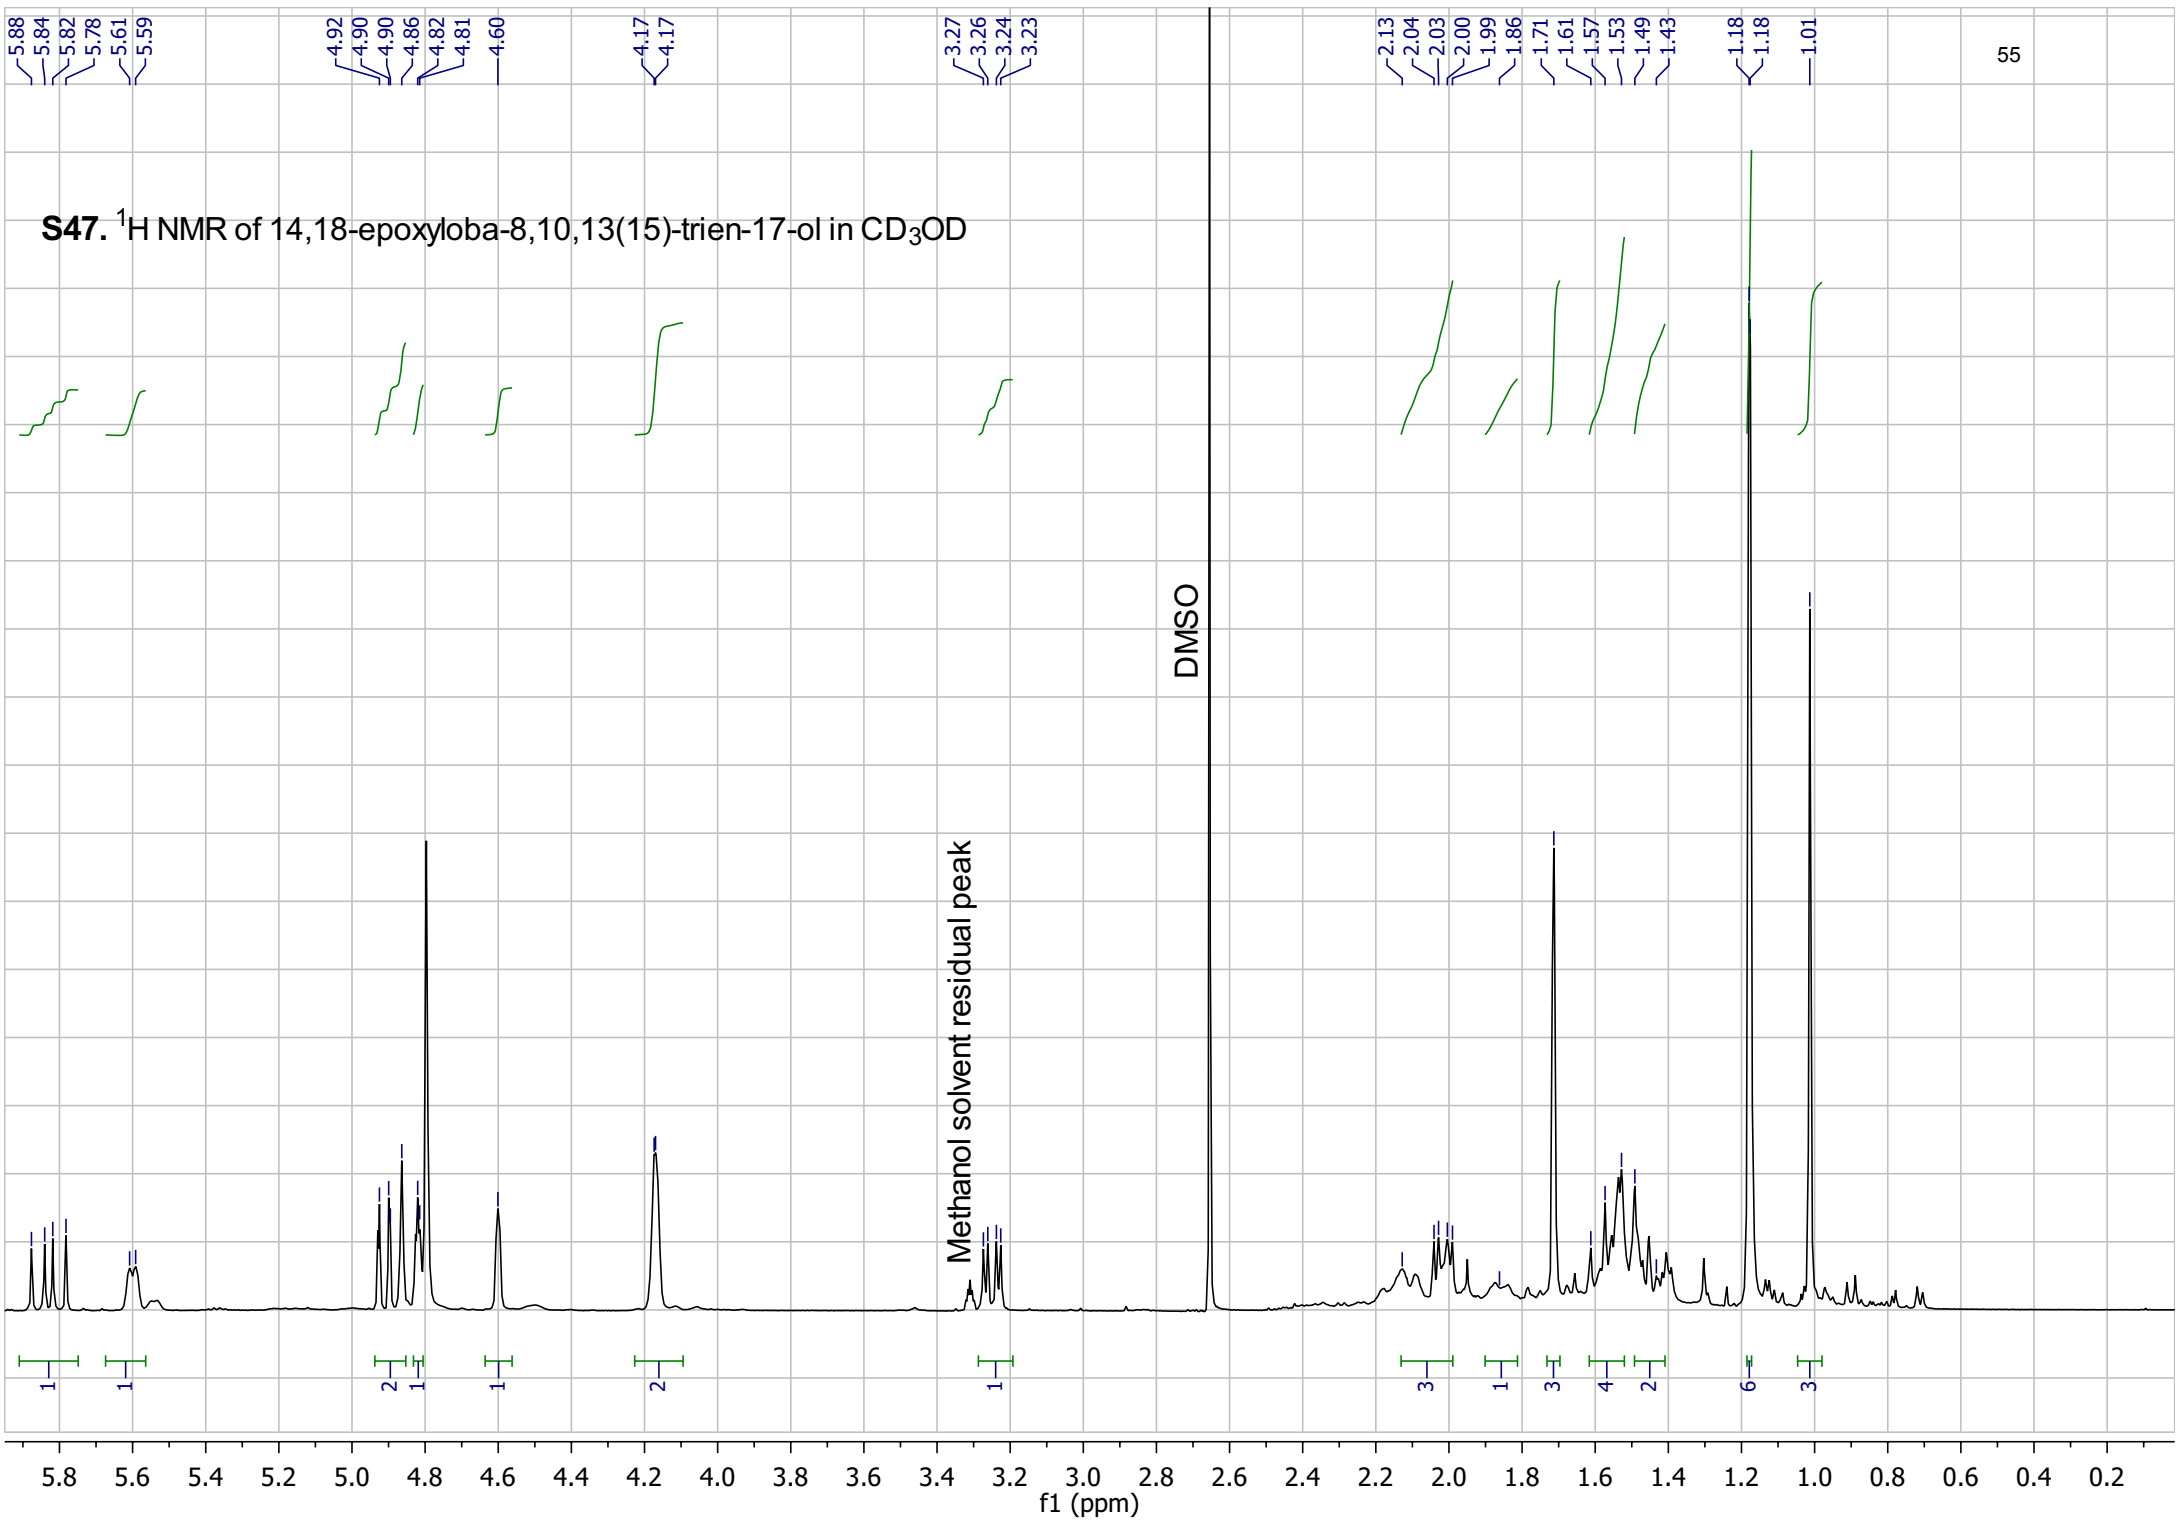

S48. <sup>13</sup>C NMR of 14,18-epoxyloba-8,10,13(15)-trien-17-ol in CD<sub>3</sub>OD

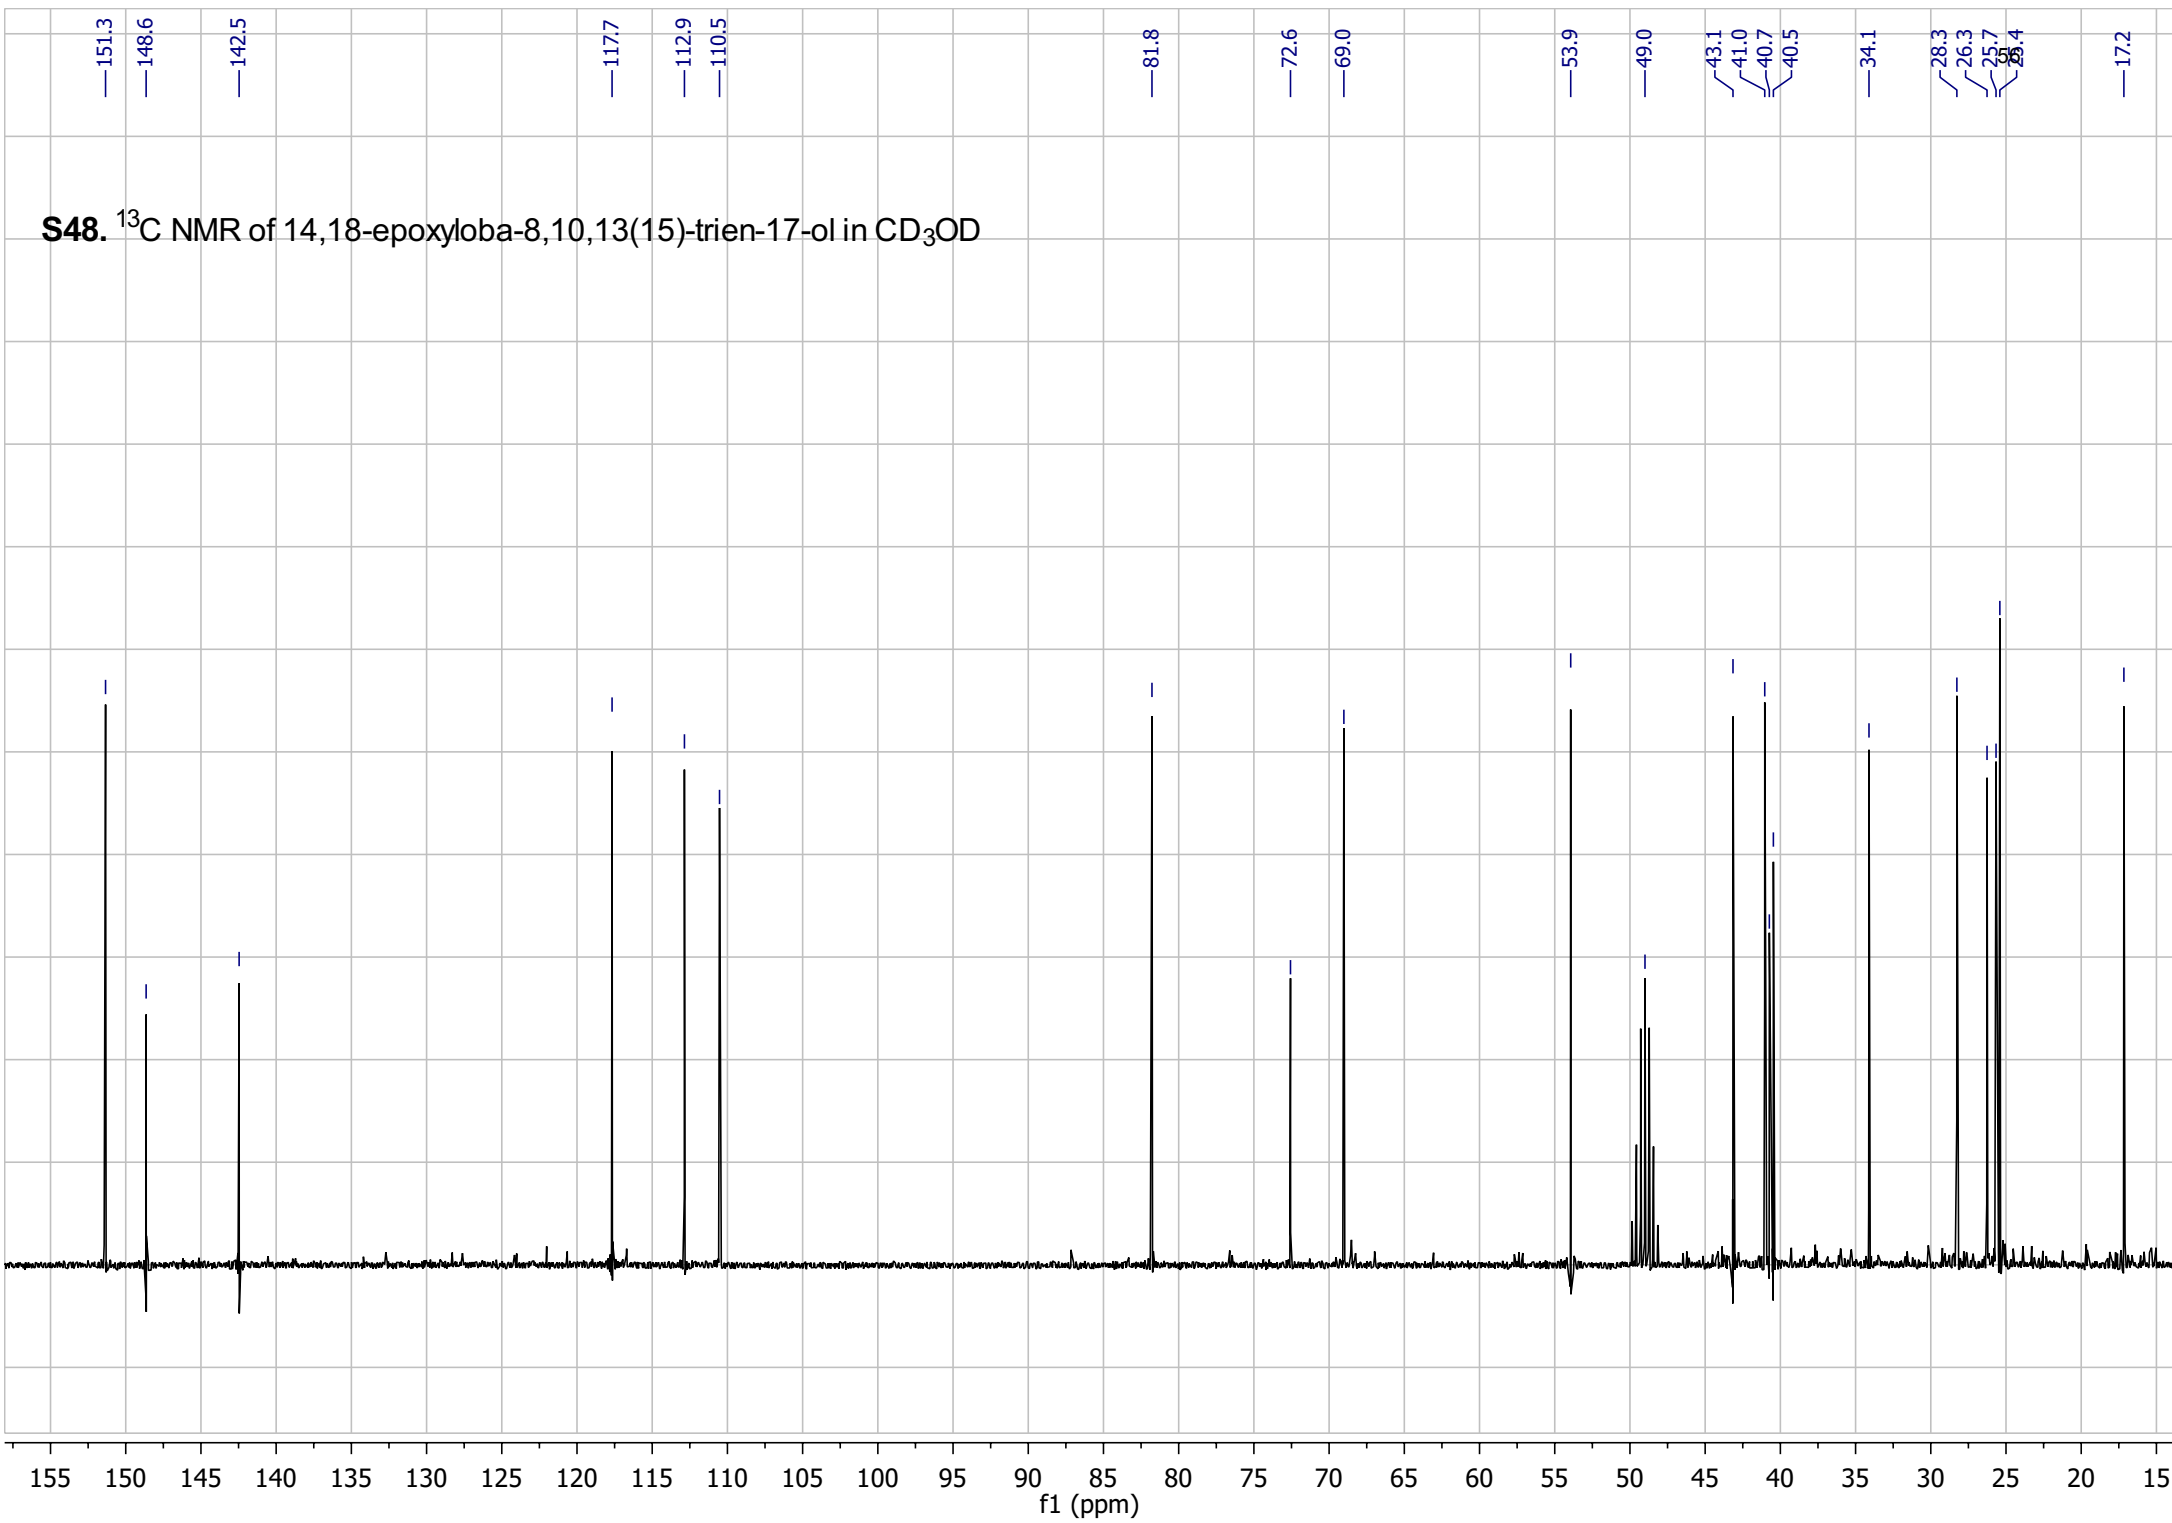



S49. DEPT NMR of 14,18-epoxyloba-8,10,13(15)-trien-17-ol in CD<sub>3</sub>OD

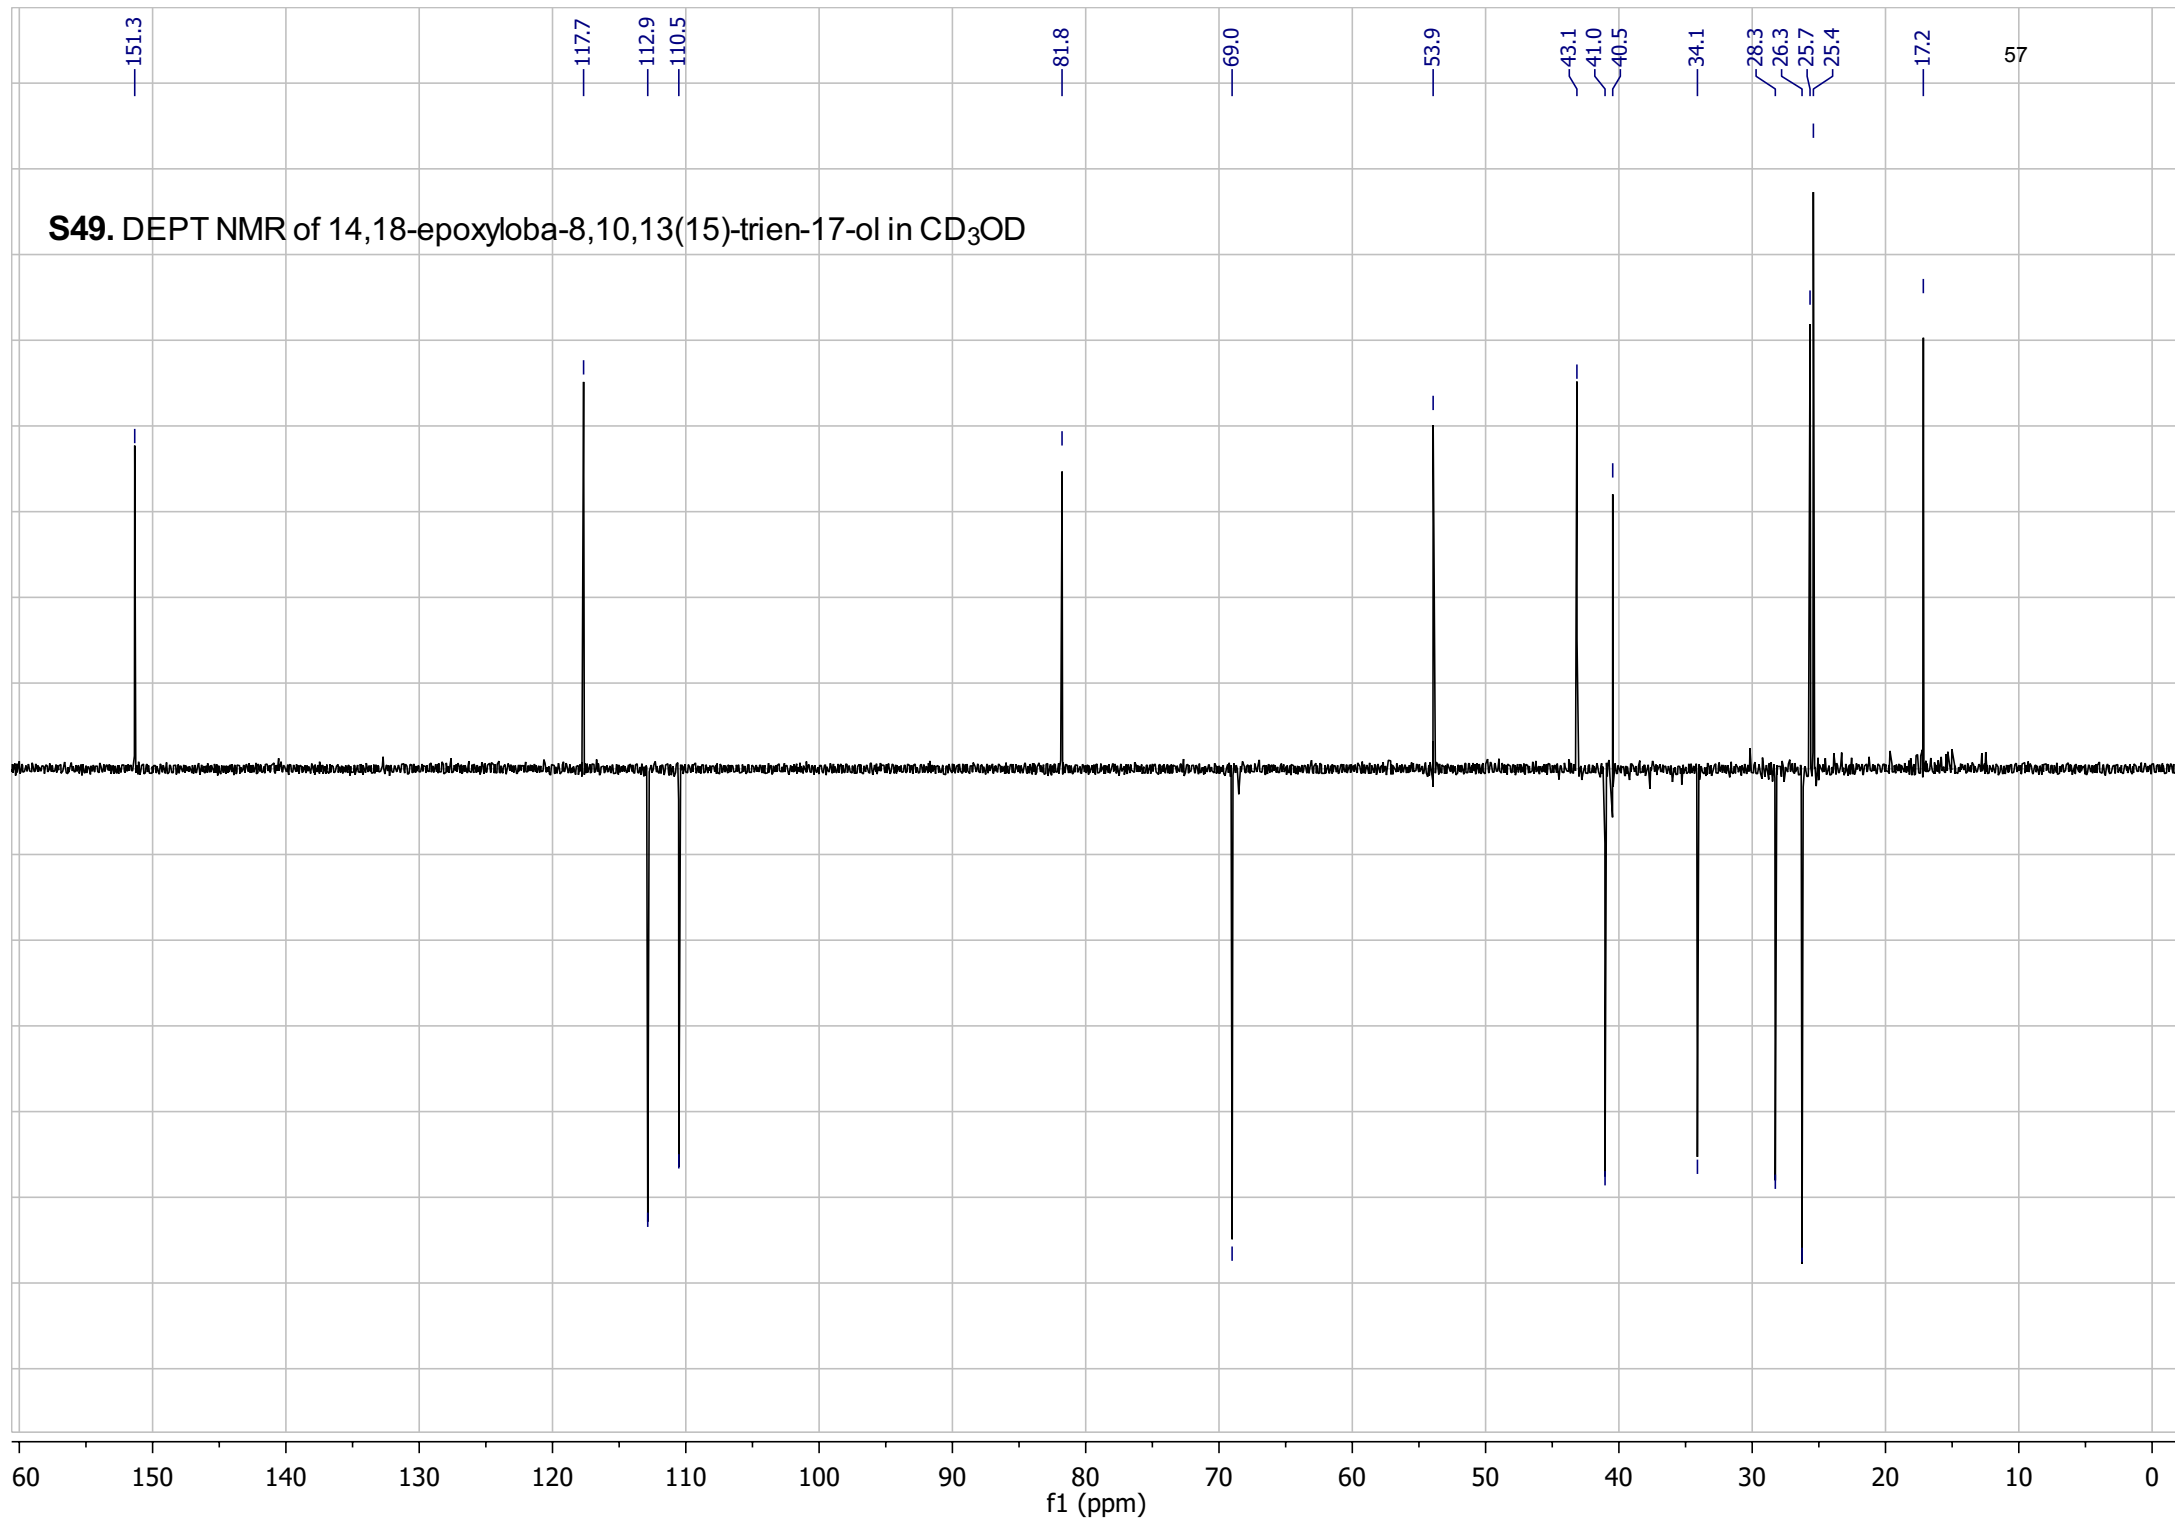

**S50.** COSY NMR of 14,18-epoxyloba-8,10,13(15)-trien-17-ol in CD<sub>3</sub>OD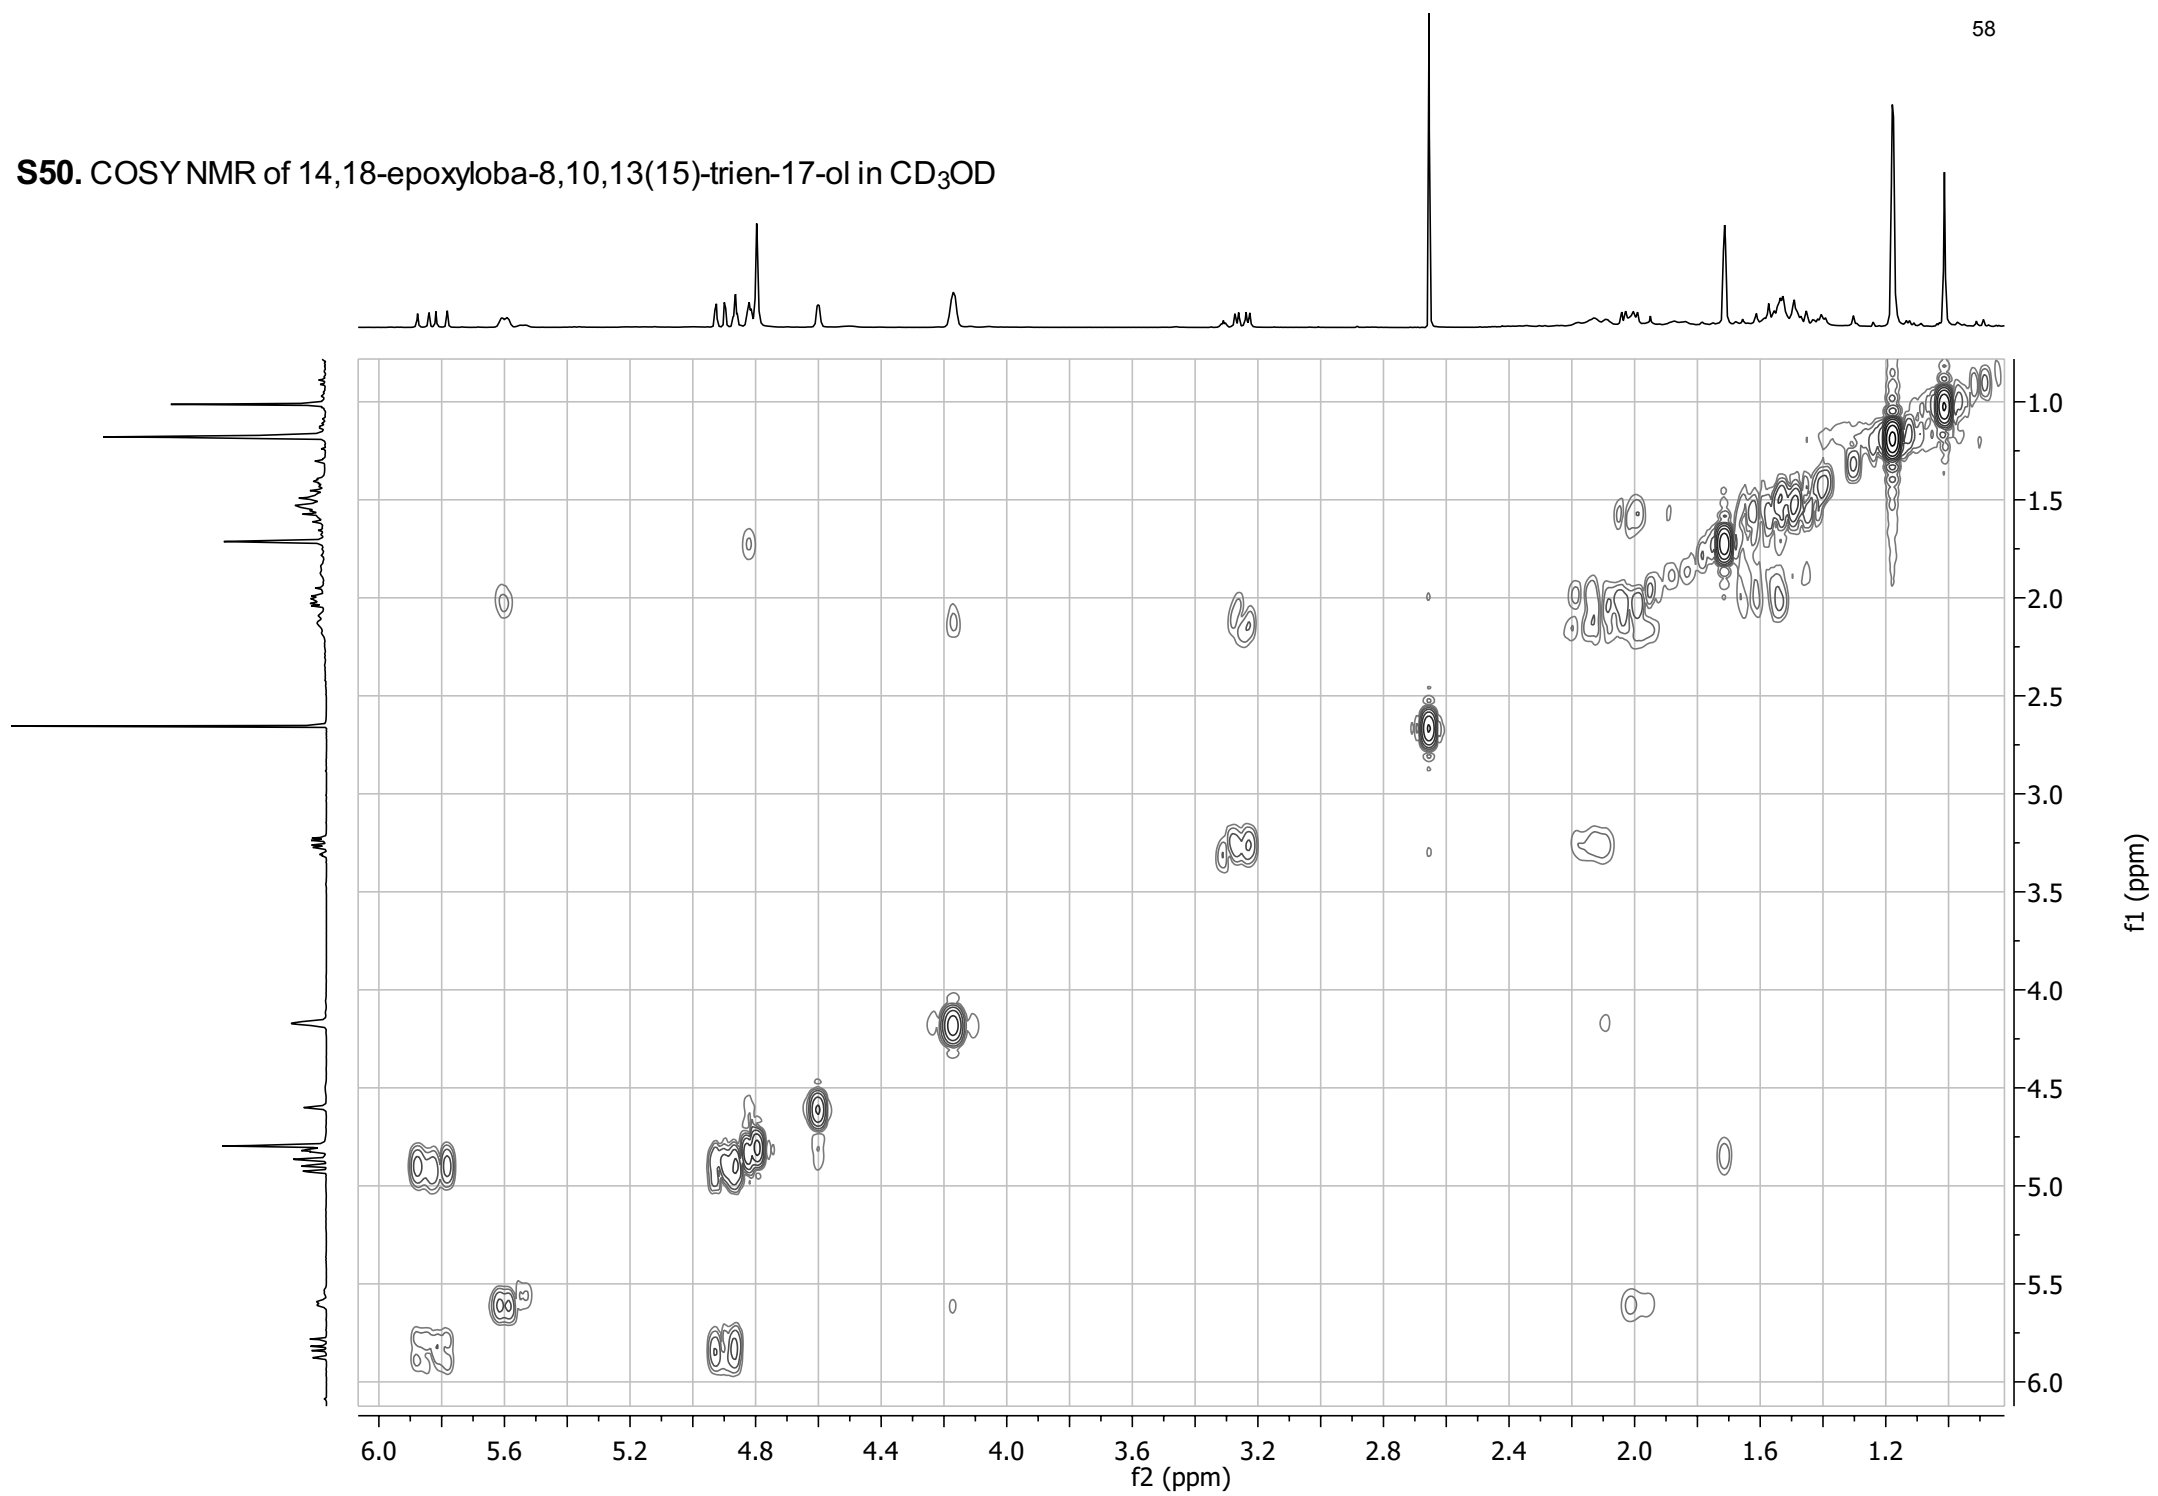

S51. HSQC NMR of 14,18-epoxyloba-8,10,13(15)-trien-17-ol in CD<sub>3</sub>OD

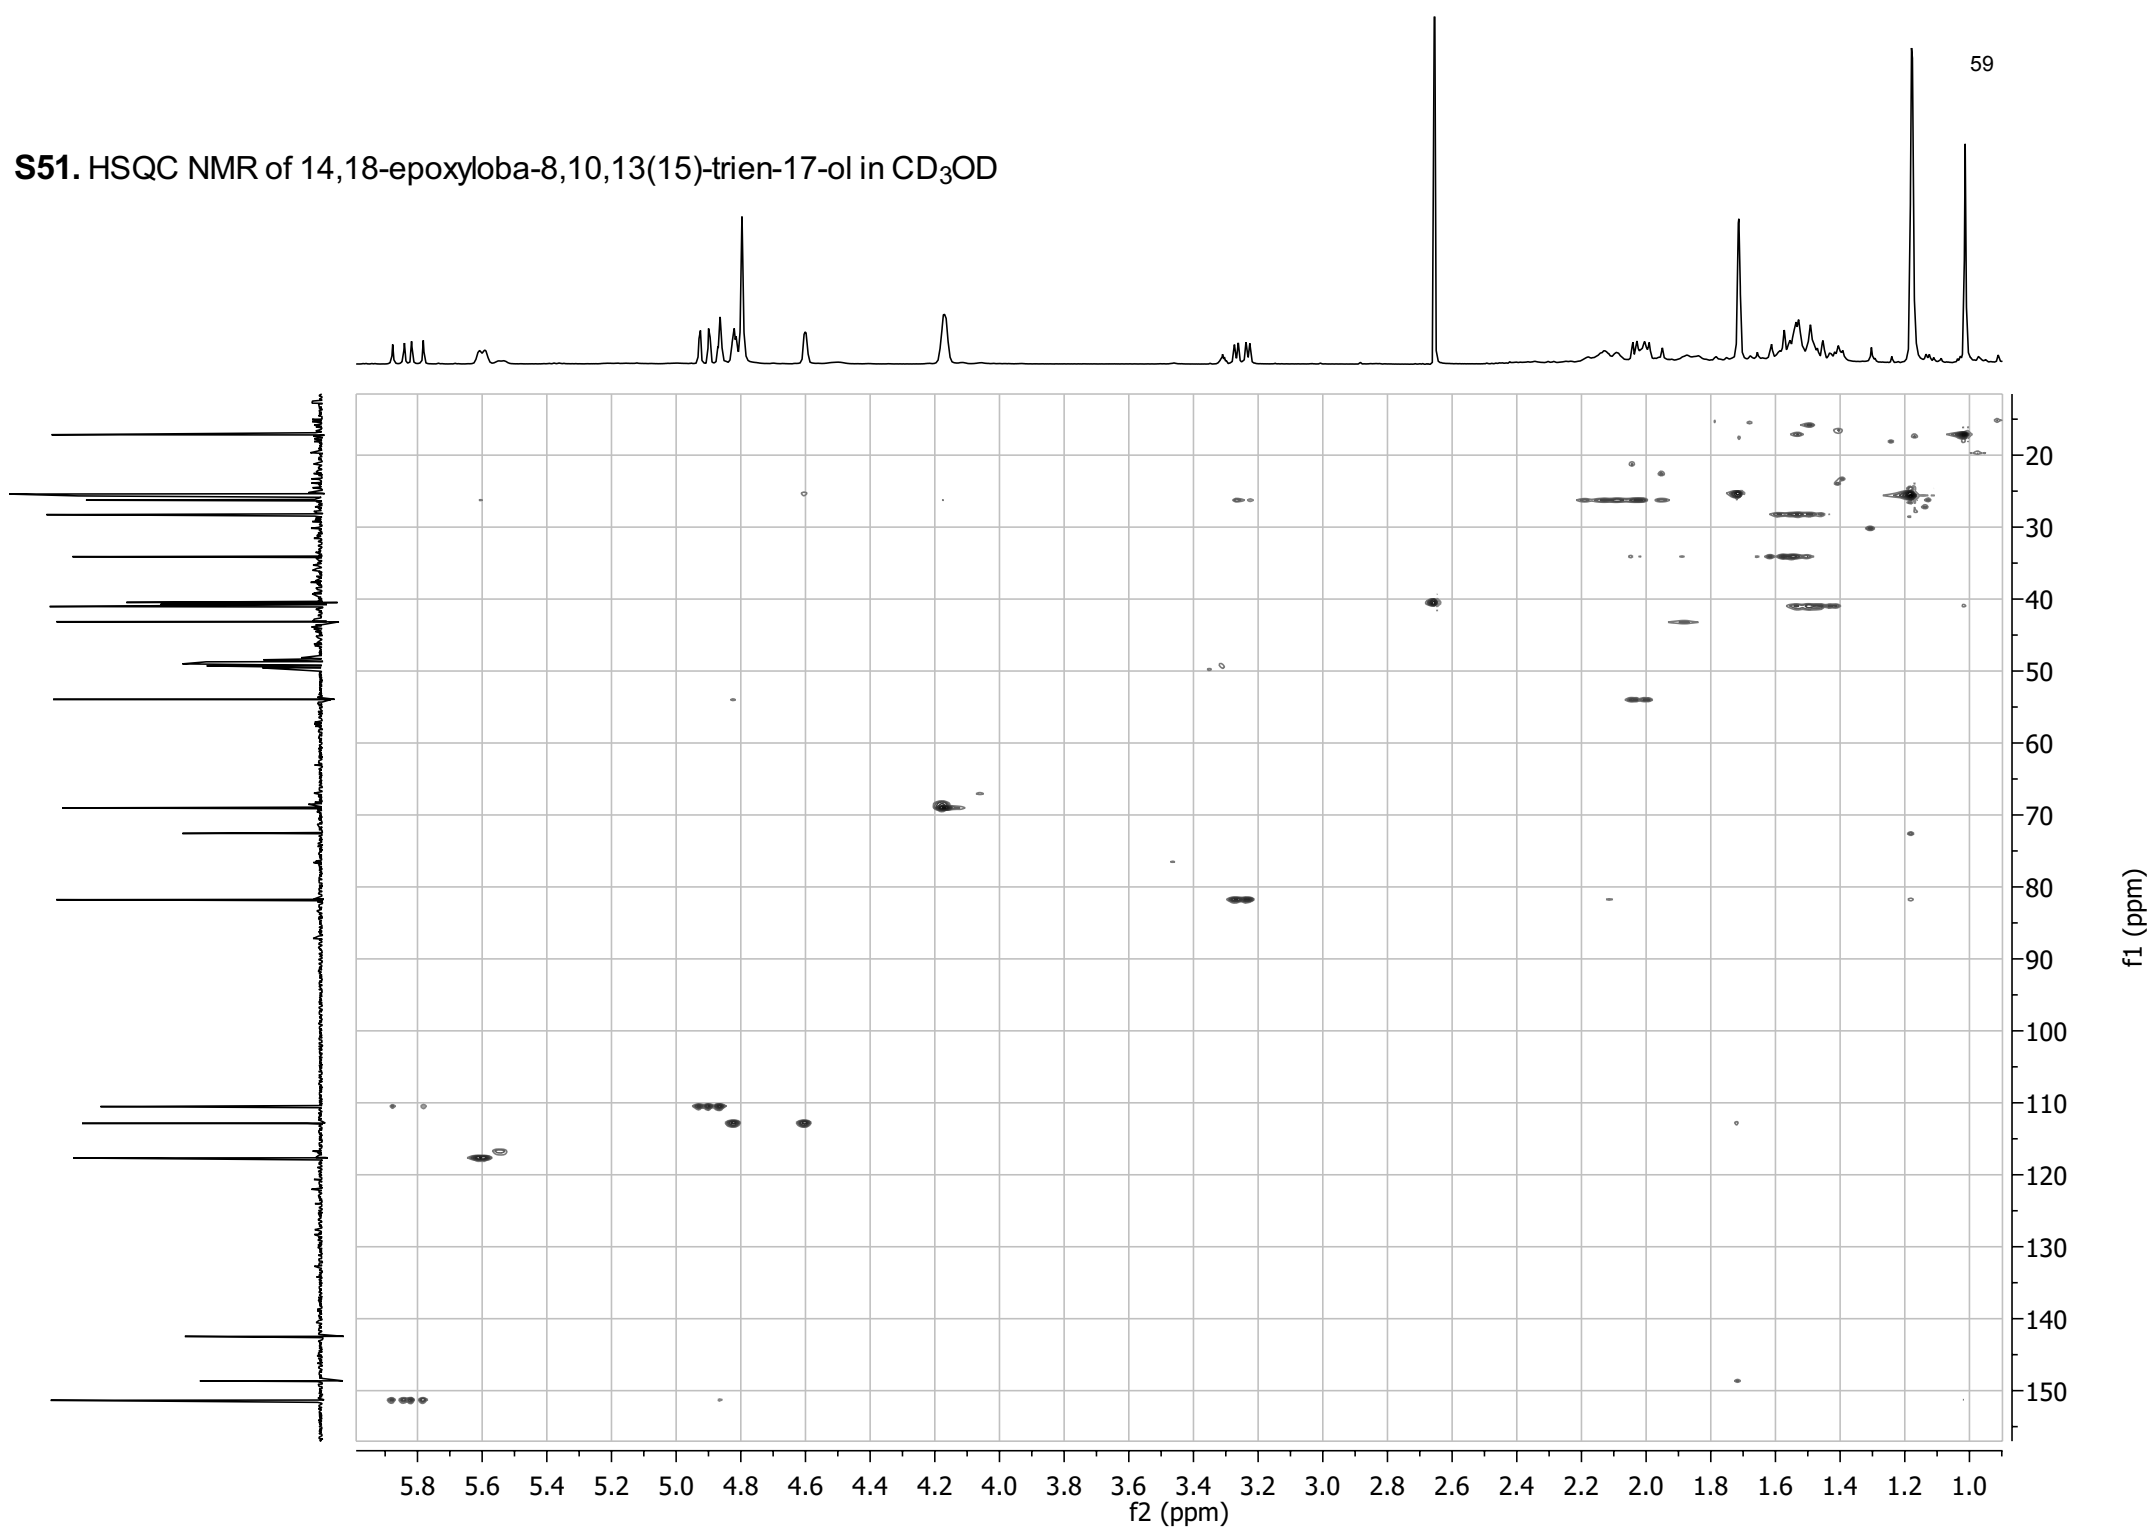

S52. HMBC NMR of 14,18-epoxyloba-8,10,13(15)-trien-17-ol in CD<sub>3</sub>OD

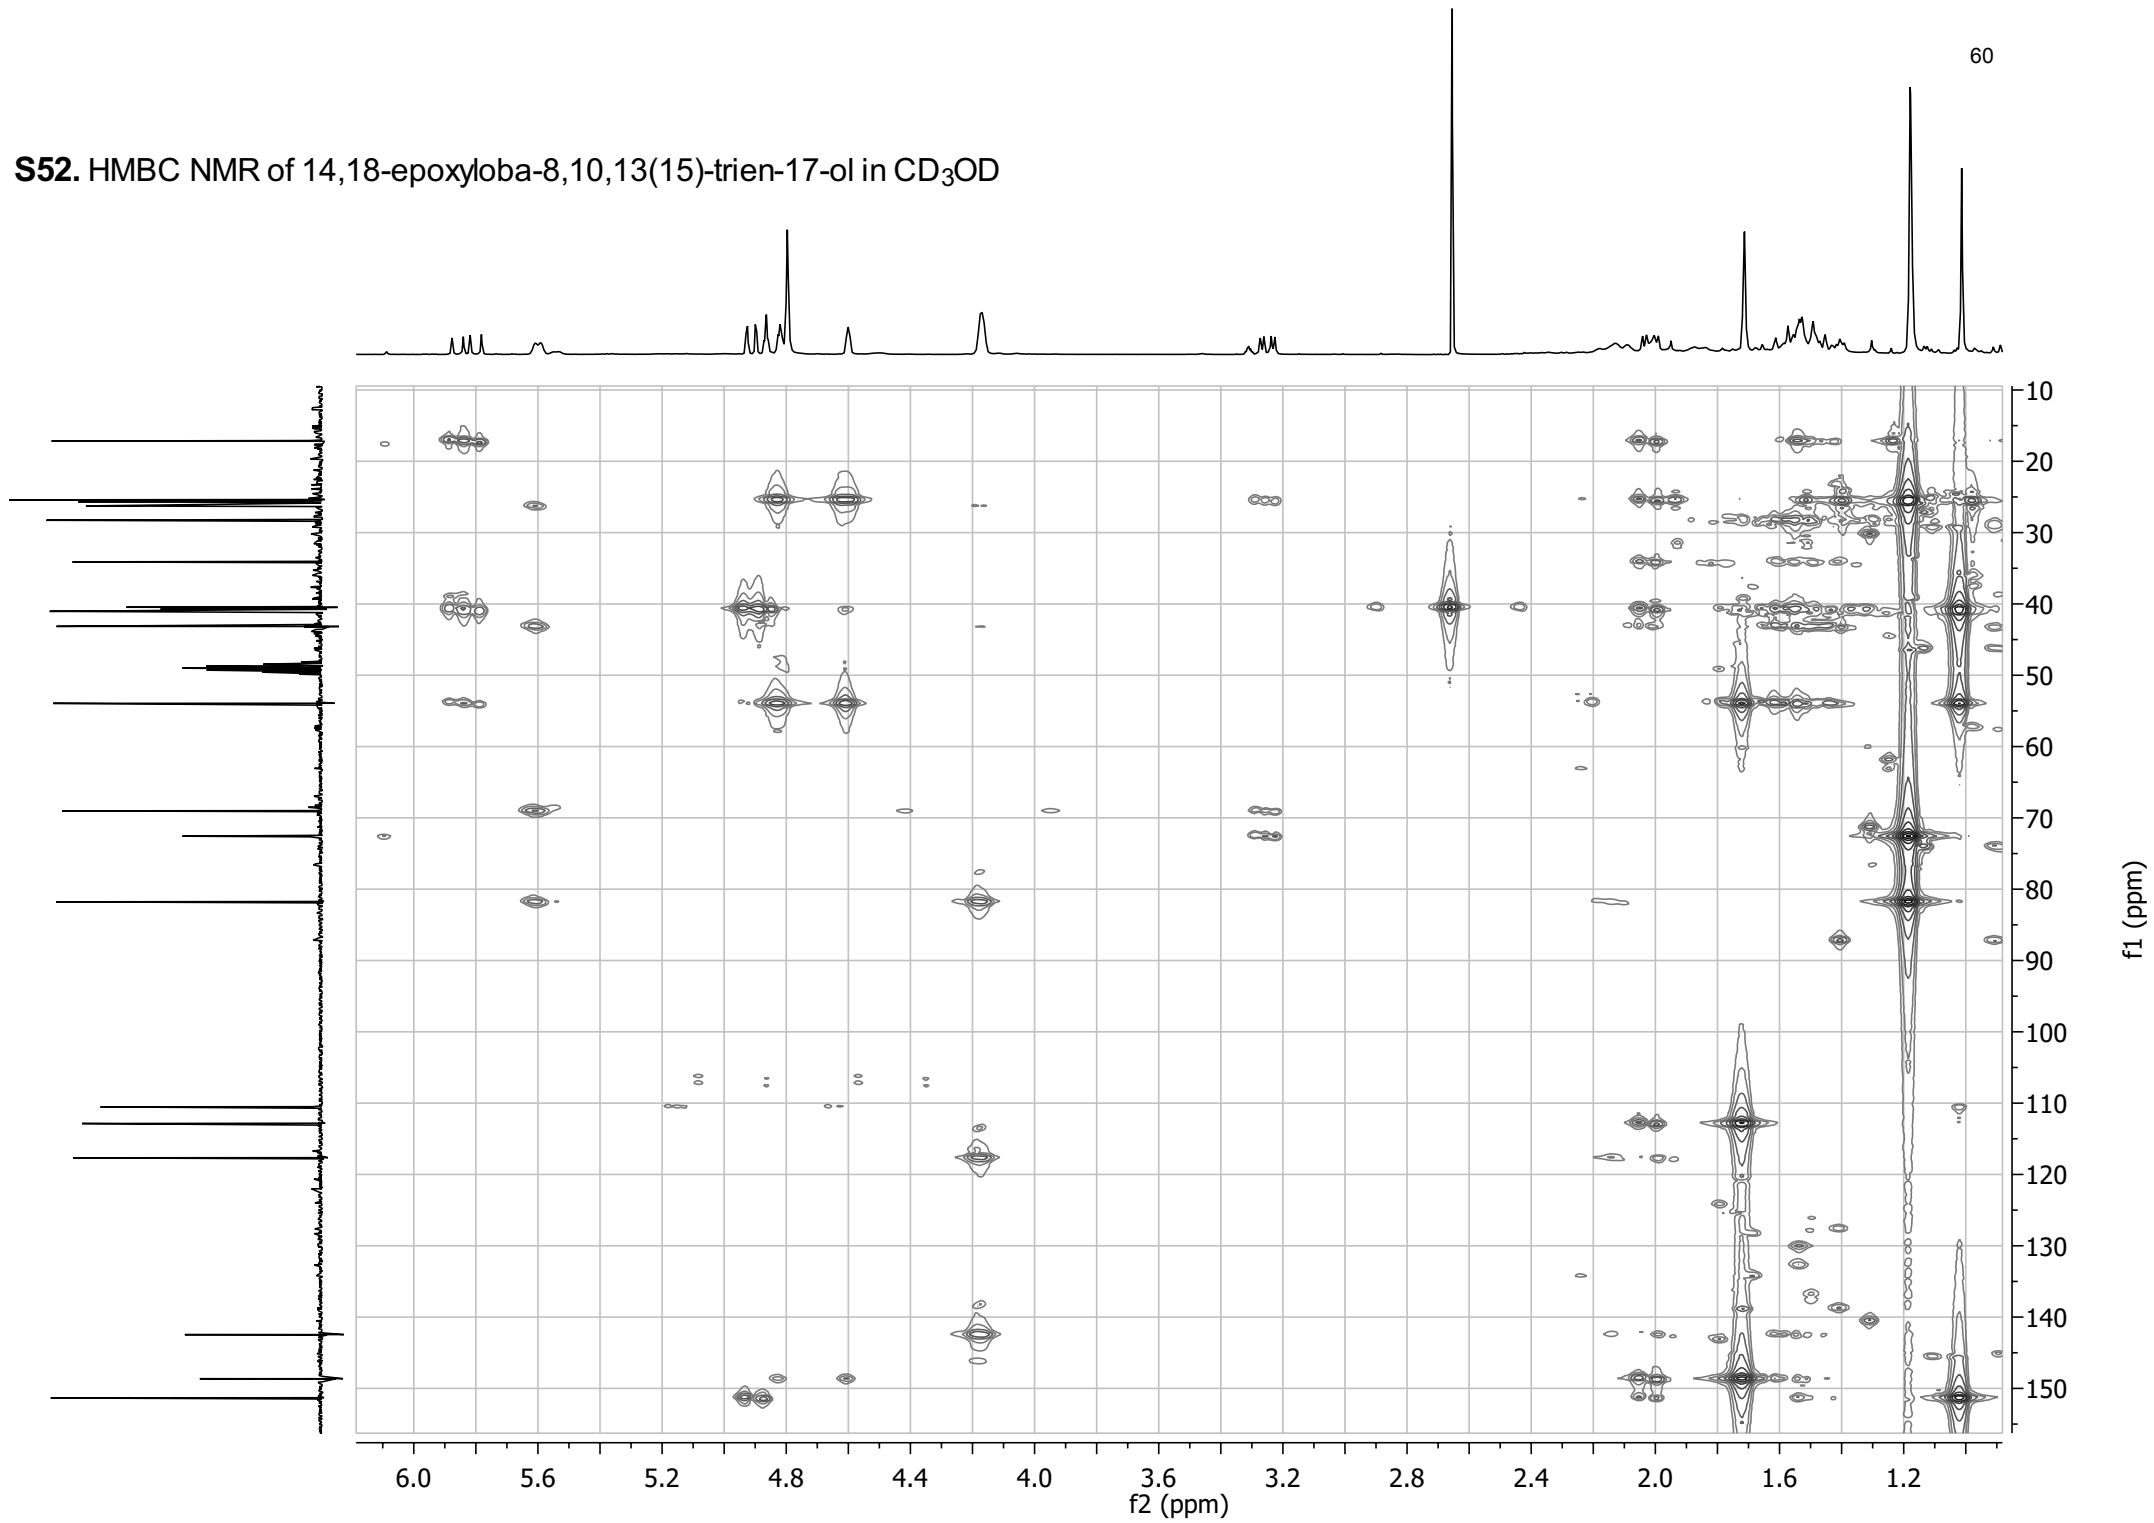

**Table S4.**  $^1\text{H}$  and  $^{13}\text{C}$  NMR data (300 MHz and 57 MHz,  $\text{CD}_3\text{OD}$ ) for 14,18-epoxyloba-8,10,13(15)-trien-17-ol.

| <b>o.</b> | <b><math>^{13}\text{C}</math><br/><math>\delta</math> (m)</b> | <b><math>^1\text{H}</math><br/><math>\delta</math> (m, J Hz)</b> | <b>COSY</b>                                             | <b>gHMBC</b>                         |
|-----------|---------------------------------------------------------------|------------------------------------------------------------------|---------------------------------------------------------|--------------------------------------|
| 1         | 40.7 (s)                                                      |                                                                  |                                                         |                                      |
| 2         | 53.9(d)                                                       | 2.01 (1H, dd, 4.0, 11.2)                                         | H <sub>a</sub> -3, H <sub>b</sub> -3                    | C-1, C-6, C-7, C-8, C-10, C-11, C-12 |
| 3         | 34.1 (t)                                                      | 1.60 (1H, m)                                                     | H-2, H <sub>b</sub> -3, H4                              | C-2, C-4, C-5, C-10, C-13            |
|           |                                                               | 1.52 (1H, m)                                                     | H-2, H <sub>a</sub> -3, H-4                             | C-1, C-2, C-4, C-5, C-10, C-12, C-13 |
| 4         | 43.2 (d)                                                      | 1.86 (1H, m)                                                     | H <sub>b</sub> -3, H <sub>a</sub> -5, H <sub>b</sub> -5 | C-3, C-5, C-13                       |
| 5         | 28.3 (t)                                                      | 1.57 (1H, m)                                                     | H4                                                      | C-3, C-2, C-4, C-13                  |
|           |                                                               | 1.48 (1H, m)                                                     | H-4                                                     | C-3, C-4                             |
| 6         | 41.0 (t)                                                      | 1.52 (1H, m)                                                     | H <sub>b</sub> -6                                       | C-2, C-3, C-5, C-7, C-8, C-10        |
|           |                                                               | 1.43 (1H, m)                                                     | H <sub>a</sub> -6                                       | C-2, C-3, C-5, C-7, C-8, C-10        |
| 7         | 17.2 (q)                                                      | 1.01 (3H, s)                                                     |                                                         | C-1, C-2, C-6, C-8                   |
| 8         | 151.3 (d)                                                     | 5.83 (1H, 10.9, 17.5)                                            | H-9                                                     | C-1, C-2, C-6, C-7                   |
| 9         | 110.5 (t)                                                     | 4.90 (1H, dd, 1.4, 17.5)                                         | H-8, H <sub>b</sub> -9                                  | C-1, C-8                             |
|           |                                                               | 4.88 (1H, t, 1.4, 10.9)                                          | H-8, H <sub>b</sub> -9                                  | C-1, C-8                             |
| 10        | 148.6 (s)                                                     |                                                                  |                                                         |                                      |
| 11        | 112.9 (t)                                                     | 4.82 (1H, dq, 1.3, 2.9)                                          | H <sub>b</sub> -11, H <sub>3</sub> -12                  | C-1, C-2, C-10, C-12                 |
|           |                                                               | 4.60 (1H, brs)                                                   | H <sub>a</sub> -11, H <sub>3</sub> -12                  | C-1, C-2, C-10, C-12                 |
| 12        | 25.4 (q)                                                      | 1.71 (3H, brs)                                                   | H <sub>a</sub> -11, H <sub>b</sub> -11                  | C-1, C-2, C-10, C-11                 |
| 13        | 142.5 (s)                                                     |                                                                  |                                                         |                                      |
| 14        | 69.0 (t)                                                      | 4.17 (2H, m)                                                     | H-15                                                    | C-4, C-13, C-15, C-16, C-17          |
| 15        | 117.7(d)                                                      | 5.60 (1H, brddd, 1.2, 3.7, 3.8)                                  | H-14                                                    | C-4, C-14, C-16, C-17                |
| 16        | 26.3 (t)                                                      | 2.13 (1H, m)                                                     | H-15, H <sub>b</sub> -16, H-17, H-14                    | C-13, C-15, C-17                     |
|           |                                                               | 2.01 (1H, m)                                                     | H-15, H <sub>a</sub> -16, H-17, H-14                    |                                      |
| 17        | 82.1 (d)                                                      | 3.25 (1H, dd, 3.6, 10.7)                                         | H-16                                                    | C-14, C-16, C-18                     |
| 18        | 72.6 (s)                                                      |                                                                  |                                                         |                                      |
| 19        | 25.7 (q)                                                      | 1.17 (3H, s)                                                     |                                                         | C-16, C-17, C-18                     |
| 20        | 25.7 (q)                                                      | 1.18 (3H, s)                                                     |                                                         | C-16, C-17, C-18                     |



**S54.**  $^{13}\text{C}$  NMR of 14,17-epoxyloba-8,10,13(15)-trien-18-ol-18-acetate in  $\text{CD}_3\text{OD}$

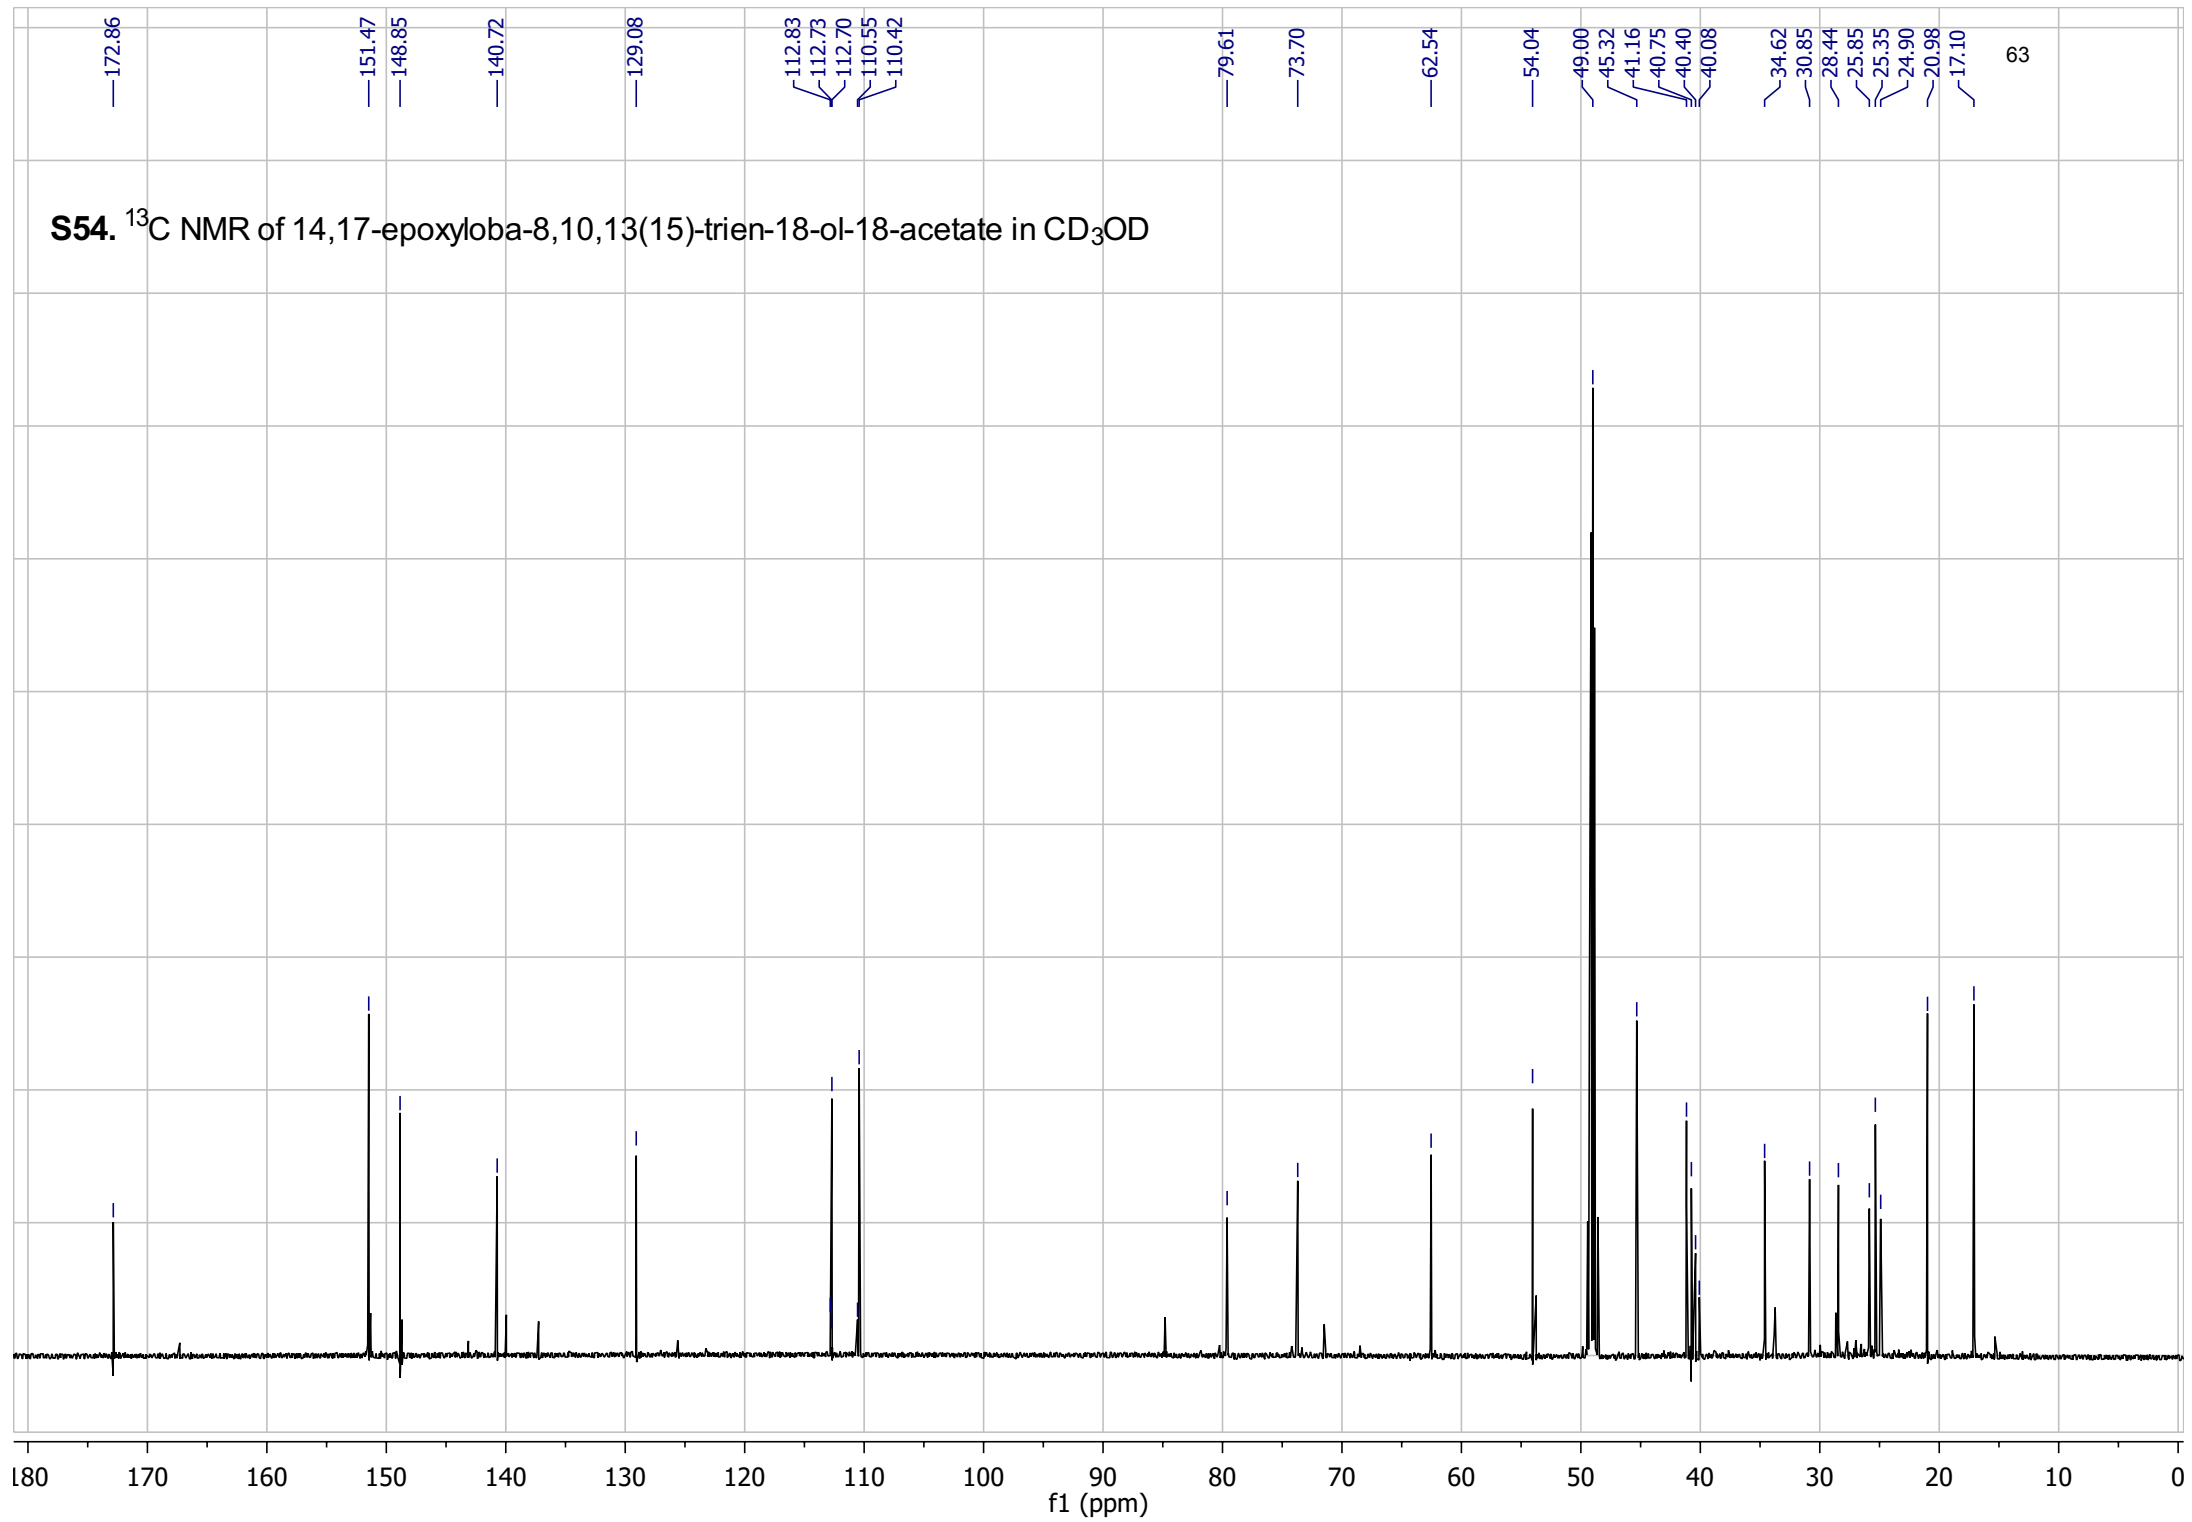

S55. DEPT NMR of 14,17-epoxyloba-8,10,13(15)-trien-18-ol-18-acetate in CD<sub>3</sub>OD

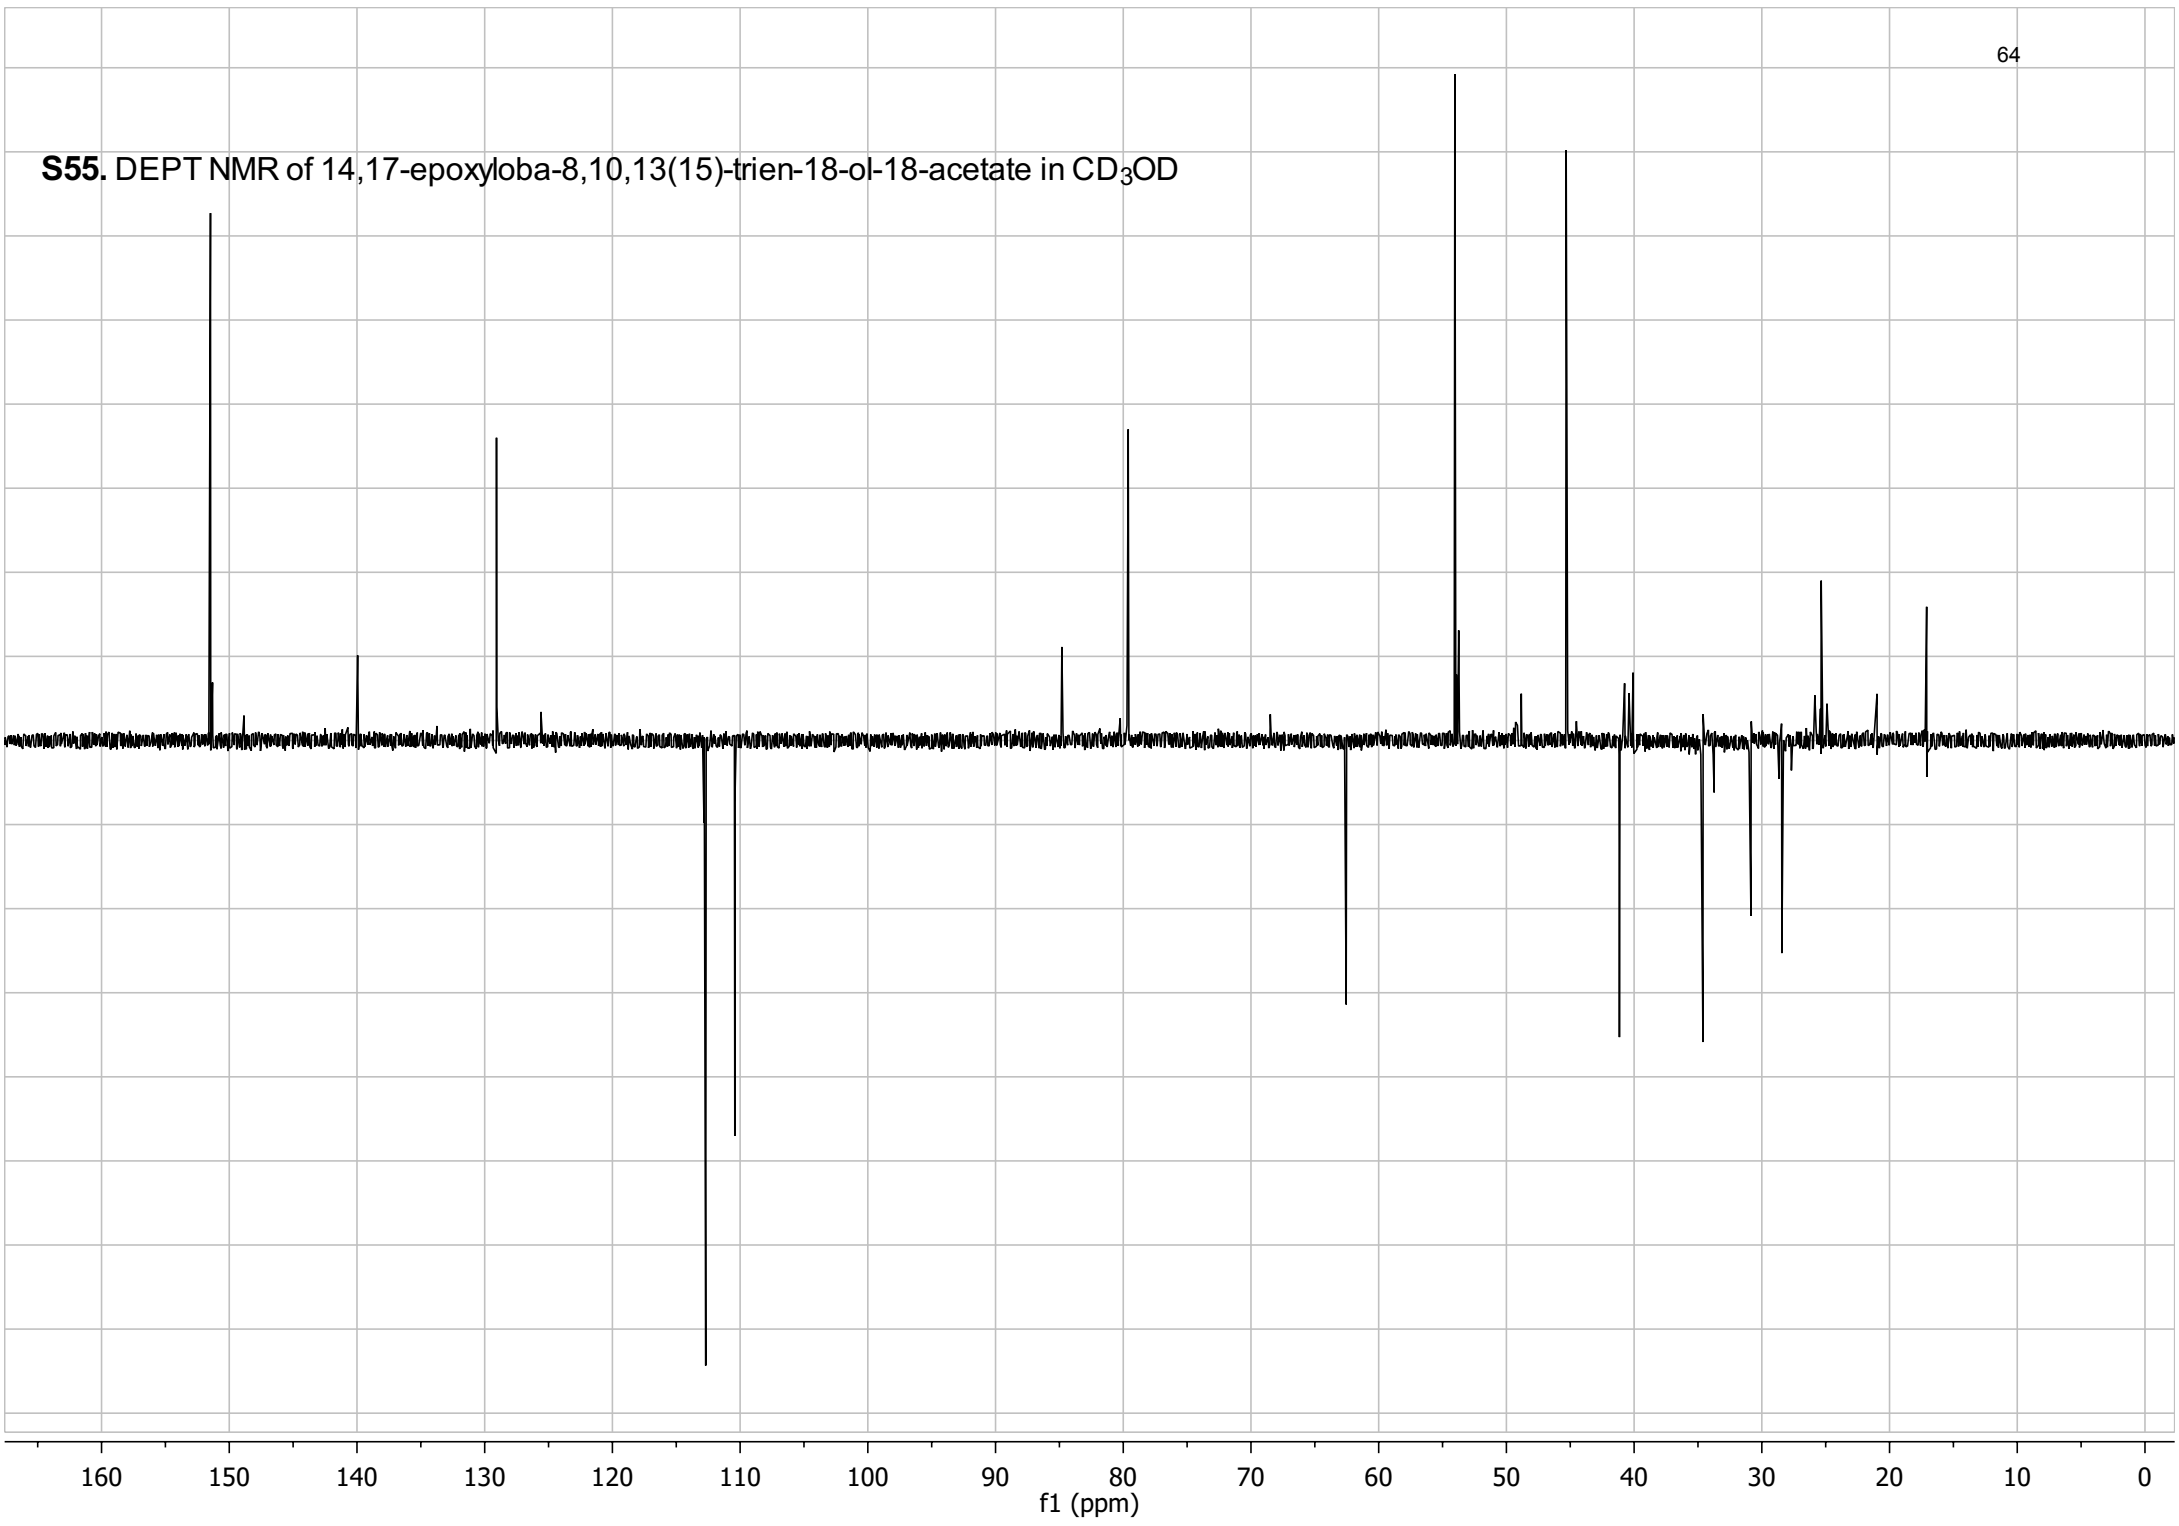

f1 (ppm)



**S56.** COSY NMR of 14,17-epoxyloba-8,10,13(15)-trien-18-ol-18-acetate in CD<sub>3</sub>OD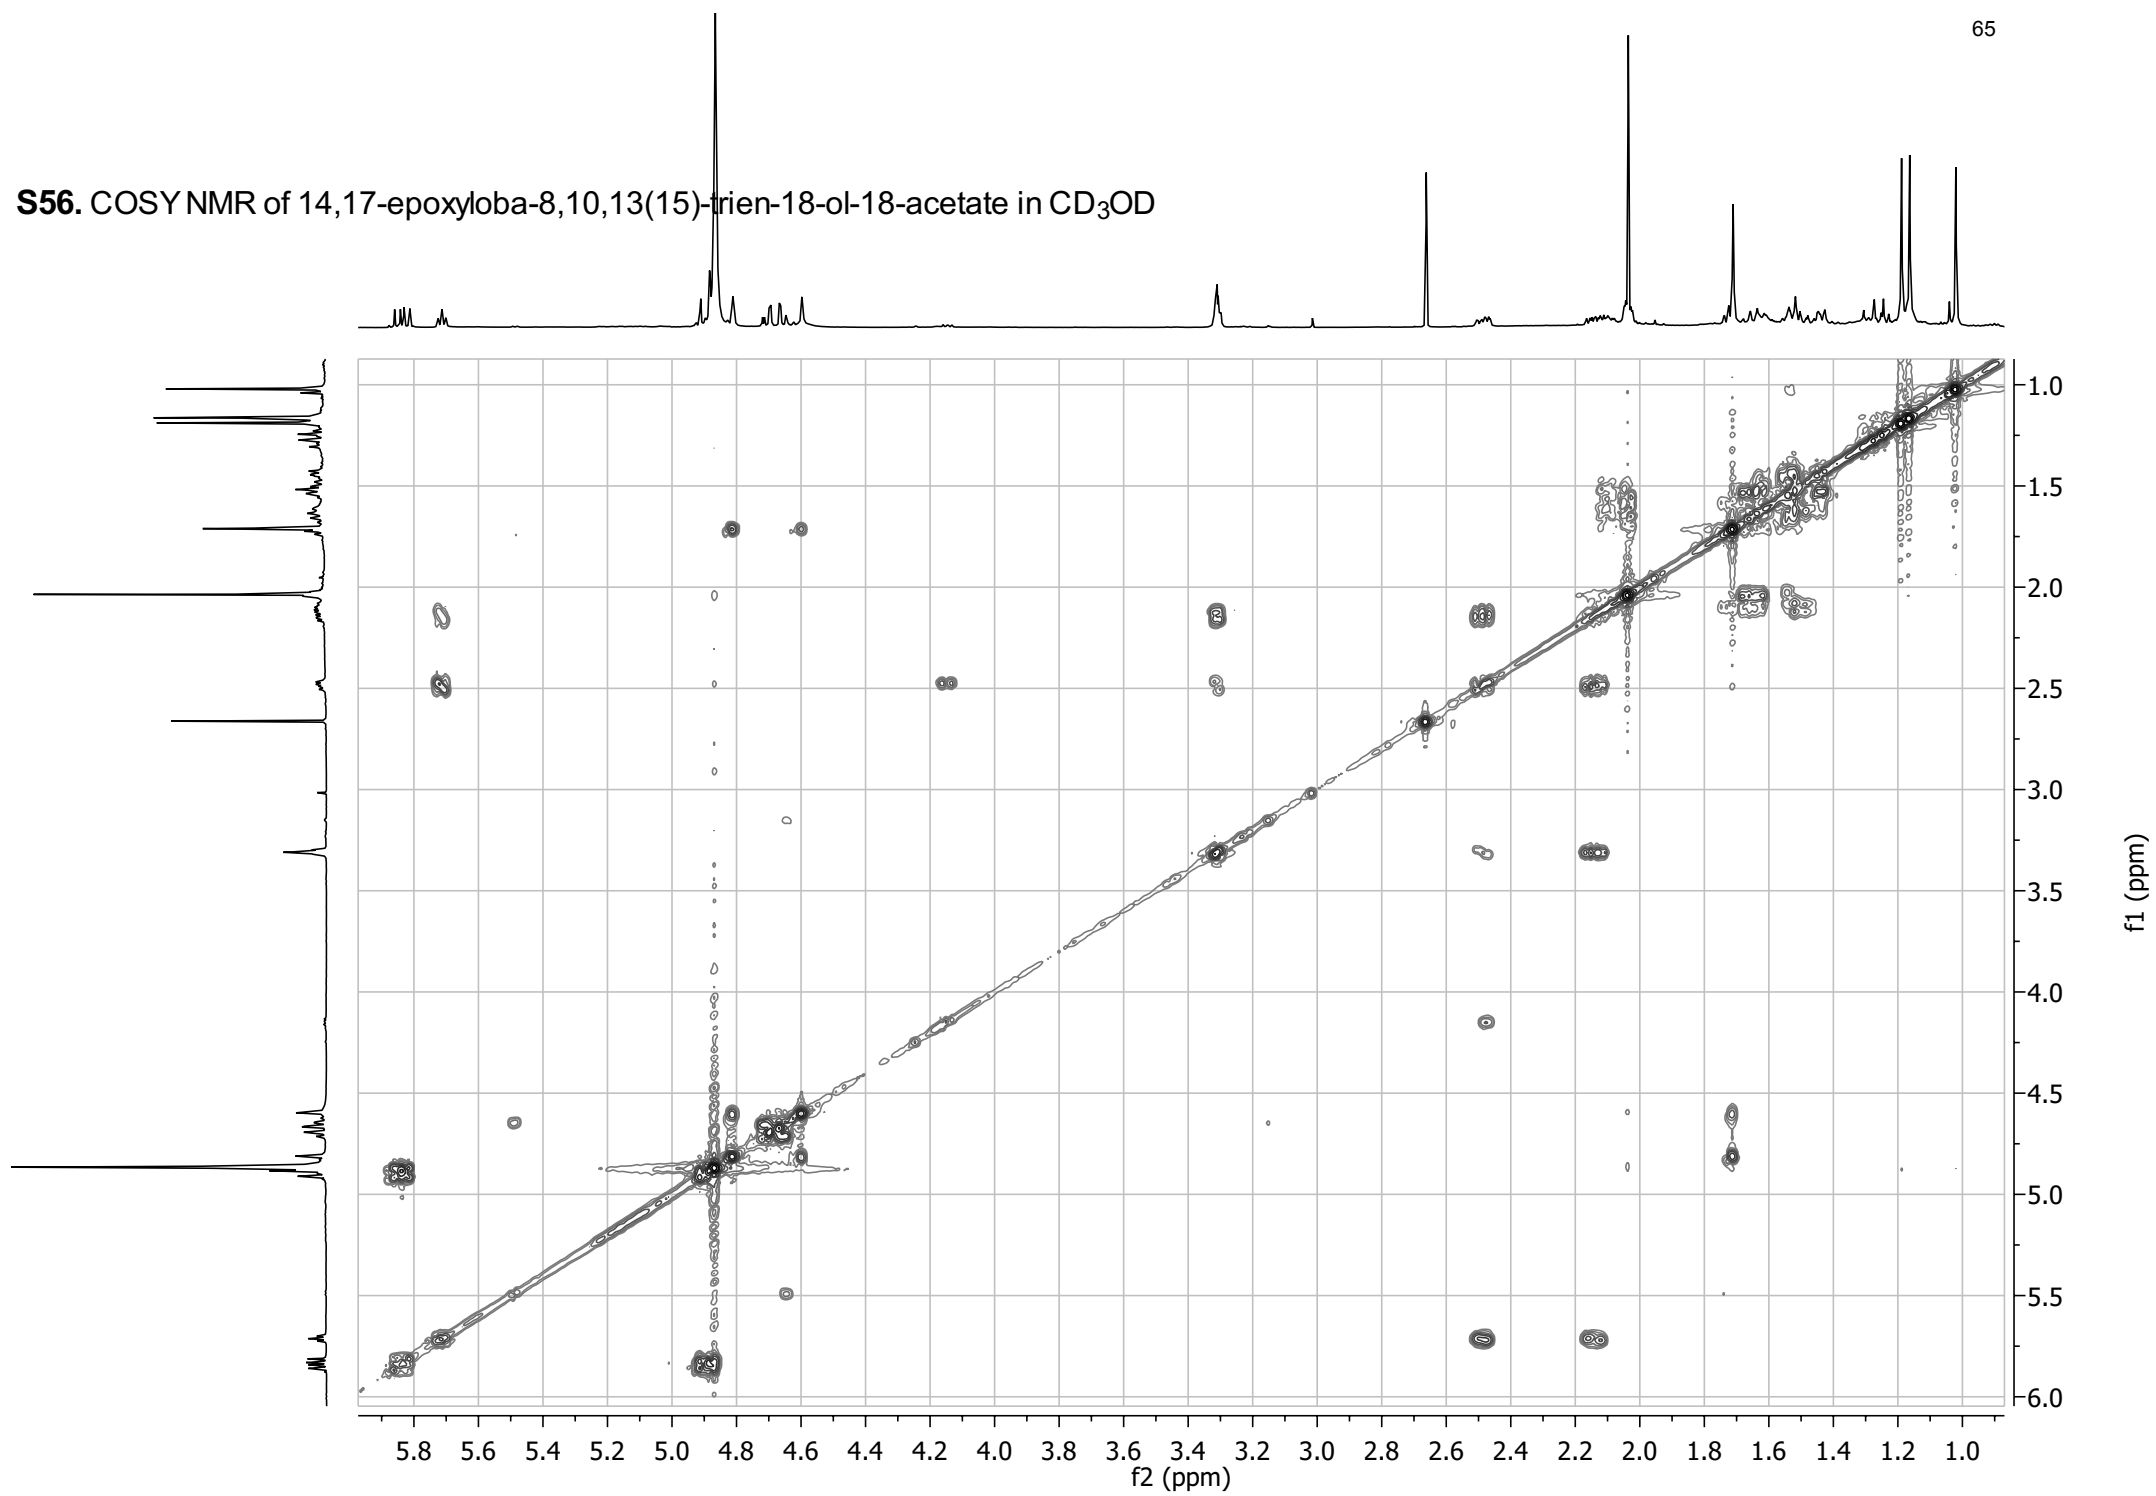

S57. HSQC NMR of 14,17-epoxyloba-8,10,13(15)-trien-18-ol-18-acetate in CD<sub>3</sub>OD

66

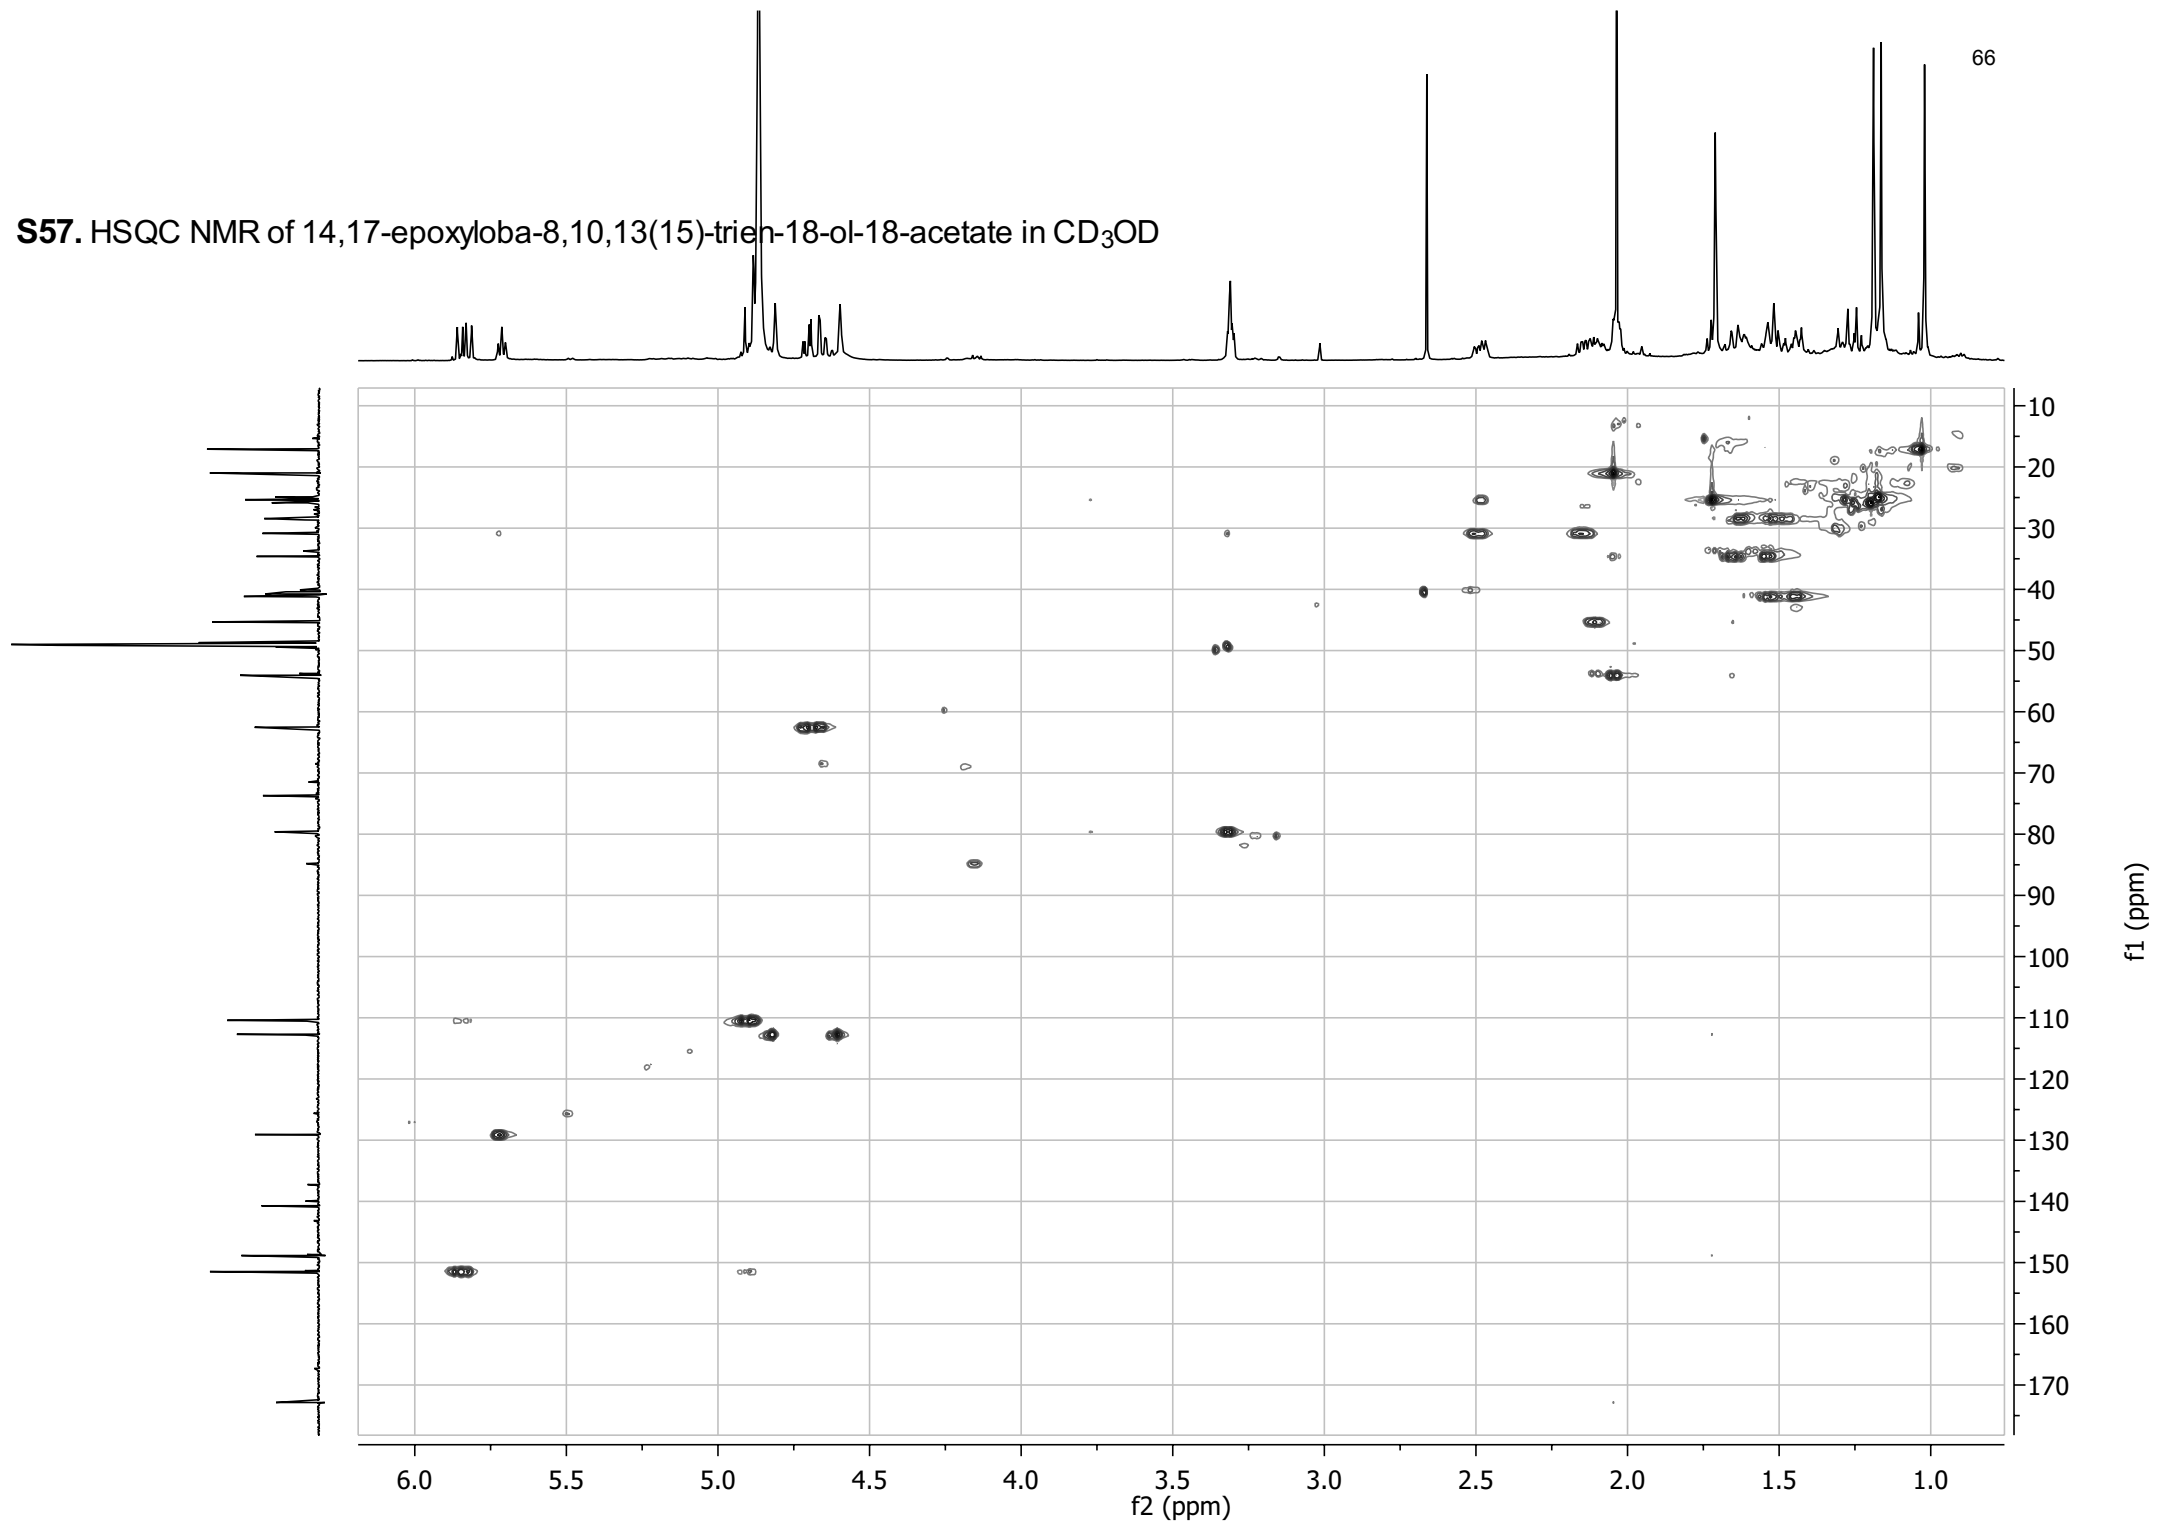

S58. HMBC NMR of 14,17-epoxyloba-8,10,13(15)-trien-18-ol-18-acetate in CD<sub>3</sub>OD

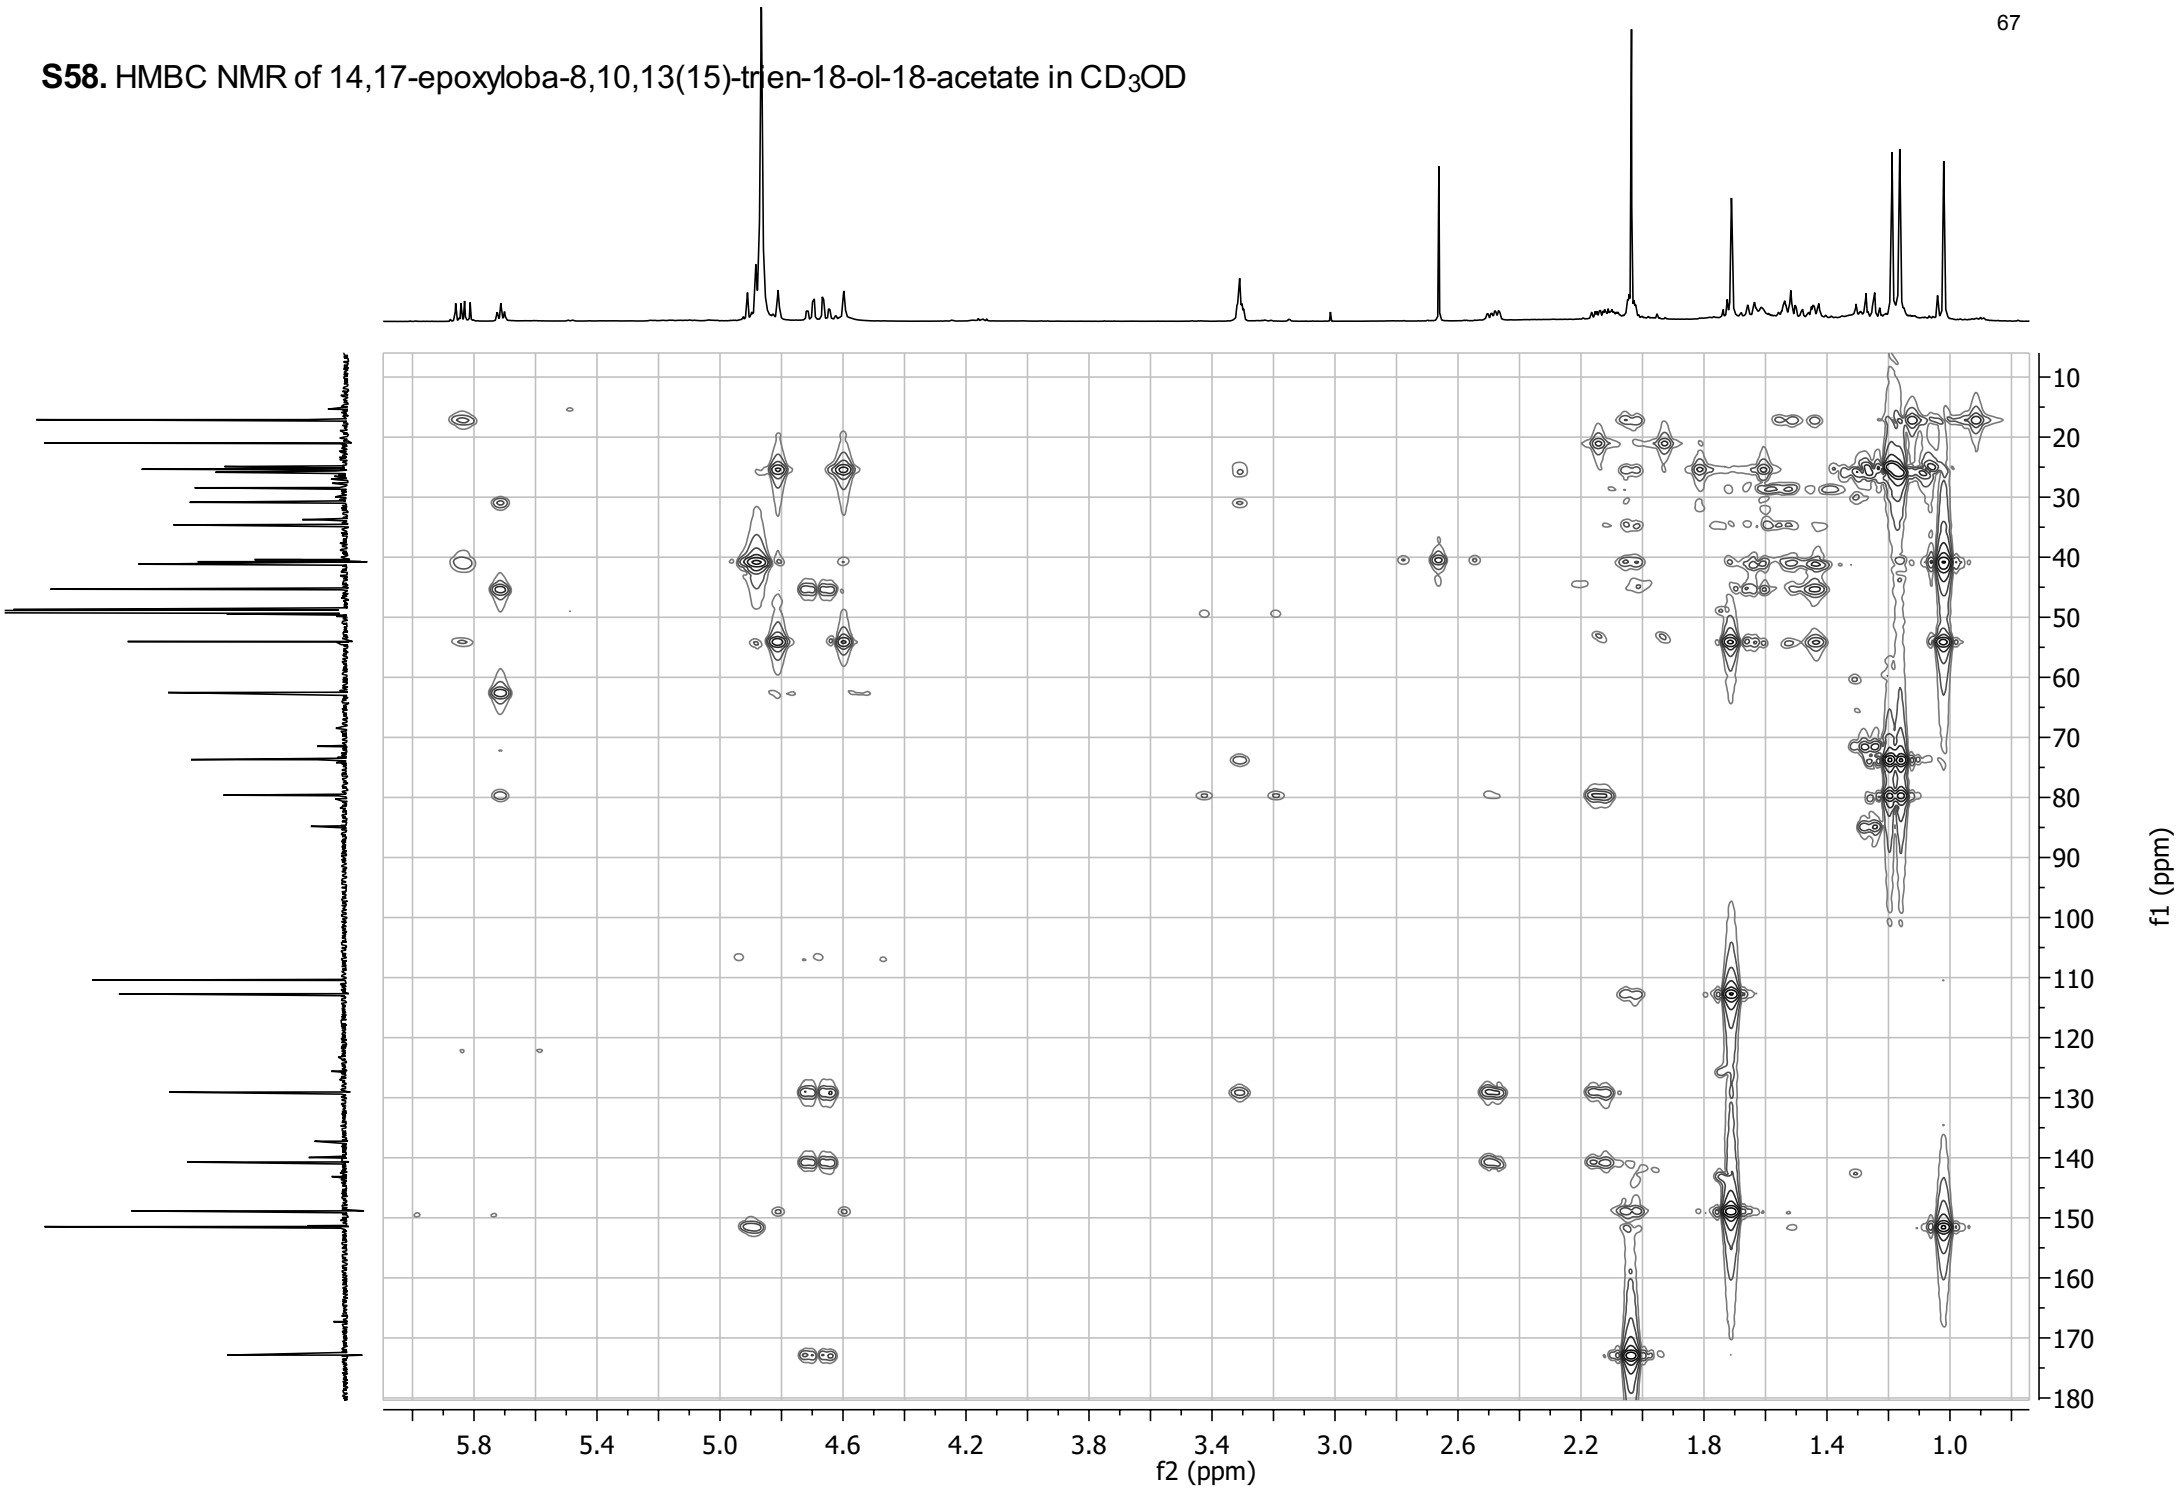

**Table S5.**  $^1\text{H}$  and  $^{13}\text{C}$  NMR data (300 MHz and 75 MHz,  $\text{CD}_3\text{OD}$ ) for 14,17-epoxyloba-8,10,13(15)-trien-18-ol-18-acetate.

| No.   | $^{13}\text{C}$<br>$\delta$ (m) | $^1\text{H}$<br>$\delta$ (m, J Hz)                                | COSY                                                                             | gHMBC                                                           |
|-------|---------------------------------|-------------------------------------------------------------------|----------------------------------------------------------------------------------|-----------------------------------------------------------------|
| 1     | 40.8 (s)                        |                                                                   |                                                                                  |                                                                 |
| 2     | 54.0 (d)                        | 2.04 (1H, m)                                                      | H <sub>a</sub> -3, H <sub>b</sub> -3                                             | C-1, C-3, C-5, C-6, C-7, C-10, C-11, C-12                       |
| 3     | 34.6 (t)                        | 1.66 (1H, m)<br>1.54 (1H, dt, 4.0, 6.7)                           | H <sub>b</sub> -3, H4<br>H-2, H <sub>a</sub> -3                                  | C-1, C-2, C-4, C-5<br>C-1, C-2, C-4, C-5, C-7                   |
| 4     | 45.3 (d)                        | 2.11 (1H, m)                                                      | H-15                                                                             | C-2, C-13, C-14, C-15                                           |
| 5     | 28.4 (t)                        | 1.64 (1H, m)<br>1.50 (1H, m)                                      | H <sub>b</sub> -5, H-6<br>H <sub>a</sub> -5                                      | C-1, C-2, C-4<br>C-8, C-10                                      |
| 6     | 41.2 (t)                        | 1.55 (1H, m)<br>1.44 (1H, m)                                      | H <sub>a</sub> -5                                                                | C-1, C-2, C-4, C-5,<br>C-1, C-2, C-4, C-5, C-7, C-8, C-10, C-13 |
| 7     | 17.1 (q)                        | 1.02 (3H, s)                                                      |                                                                                  | C-1, C-2, C-8, C-9                                              |
| 8     | 151.5 (d)                       | 5.84 (1H, 10.8, 17.5)                                             | H-9                                                                              | C-1, C-2, C-7                                                   |
| 9     | 110.4 (t)                       | 4.91 (1H, dd, 1.4, 17.5)<br>4.89 (1H, t, 1.4, 10.8)               | H-8<br>H-8                                                                       | C-1, C-2, C-8<br>C-1, C-2, C-8                                  |
| 10    | 148.9 (s)                       |                                                                   |                                                                                  |                                                                 |
| 11    | 112.7 (t)                       | 4.81 (1H, brdq, 1.7, 3.0)<br>4.60 (1H, brdq, 0.8, 3.0)            | H <sub>b</sub> -11, H <sub>3</sub> -12<br>H <sub>a</sub> -11, H <sub>3</sub> -12 | C-1, C-2, C-10, C-12<br>C-1, C-2, C-10, C-12                    |
| 12    | 25.4 (q)                        | 1.71 (3H, brdd, 0.8)                                              | H <sub>a</sub> -11, H <sub>b</sub> -11                                           | C-2, C-10, C-11                                                 |
| 13    | 141.7 (s)                       |                                                                   |                                                                                  |                                                                 |
| 14    | 62.5 (t)                        | 4.71 (1H, dd, 3.7, 12.1)<br>4.66 (1H, dd, 2.6, 12.1)              |                                                                                  | C-4, C-13, C-15, C-22                                           |
| 15    | 129.1 (d)                       | 5.71 (1H, brt, 7.2)                                               | H <sub>a</sub> -16, H <sub>b</sub> -16                                           | C-4, C-13, C-14, C-16, C-17                                     |
| 16    | 30.9 (t)                        | 2.49 (1H, ddd, 2.4, 7.2, 15.2)<br>2.13 (1H, ddd, 7.2, 10.1, 15.2) | H-15<br>H-14, H-15, H <sub>a</sub> -16                                           | C-4, C-13, C-14, C-15, C-17, C-18<br>C-13, C-14, C-15, C-18     |
| 17    | 79.6 (d)                        | 3.31 (1H, dd, 2.4, 10.1)                                          | H <sub>a</sub> -16, H <sub>b</sub> -16                                           | C-15, C-16, C-18, C-19, C-20                                    |
| 18    | 73.7 (s)                        |                                                                   |                                                                                  |                                                                 |
| 19    | 24.9 (q)                        | 1.16 (3H, s)                                                      |                                                                                  | C-14, C-18, C20                                                 |
| 20    | 25.9 (q)                        | 1.19 (3H, s)                                                      |                                                                                  | C-14, C-18, C-19                                                |
| OAc   | 172.9 (s)                       |                                                                   |                                                                                  |                                                                 |
| OAcMe | 21.0 (q)                        | 2.04 (3H, s)                                                      |                                                                                  | C-22                                                            |

S59. <sup>1</sup>H NMR of (17R)-loba-8,10,13(15)-trien-17,18-diol in CD<sub>3</sub>OD

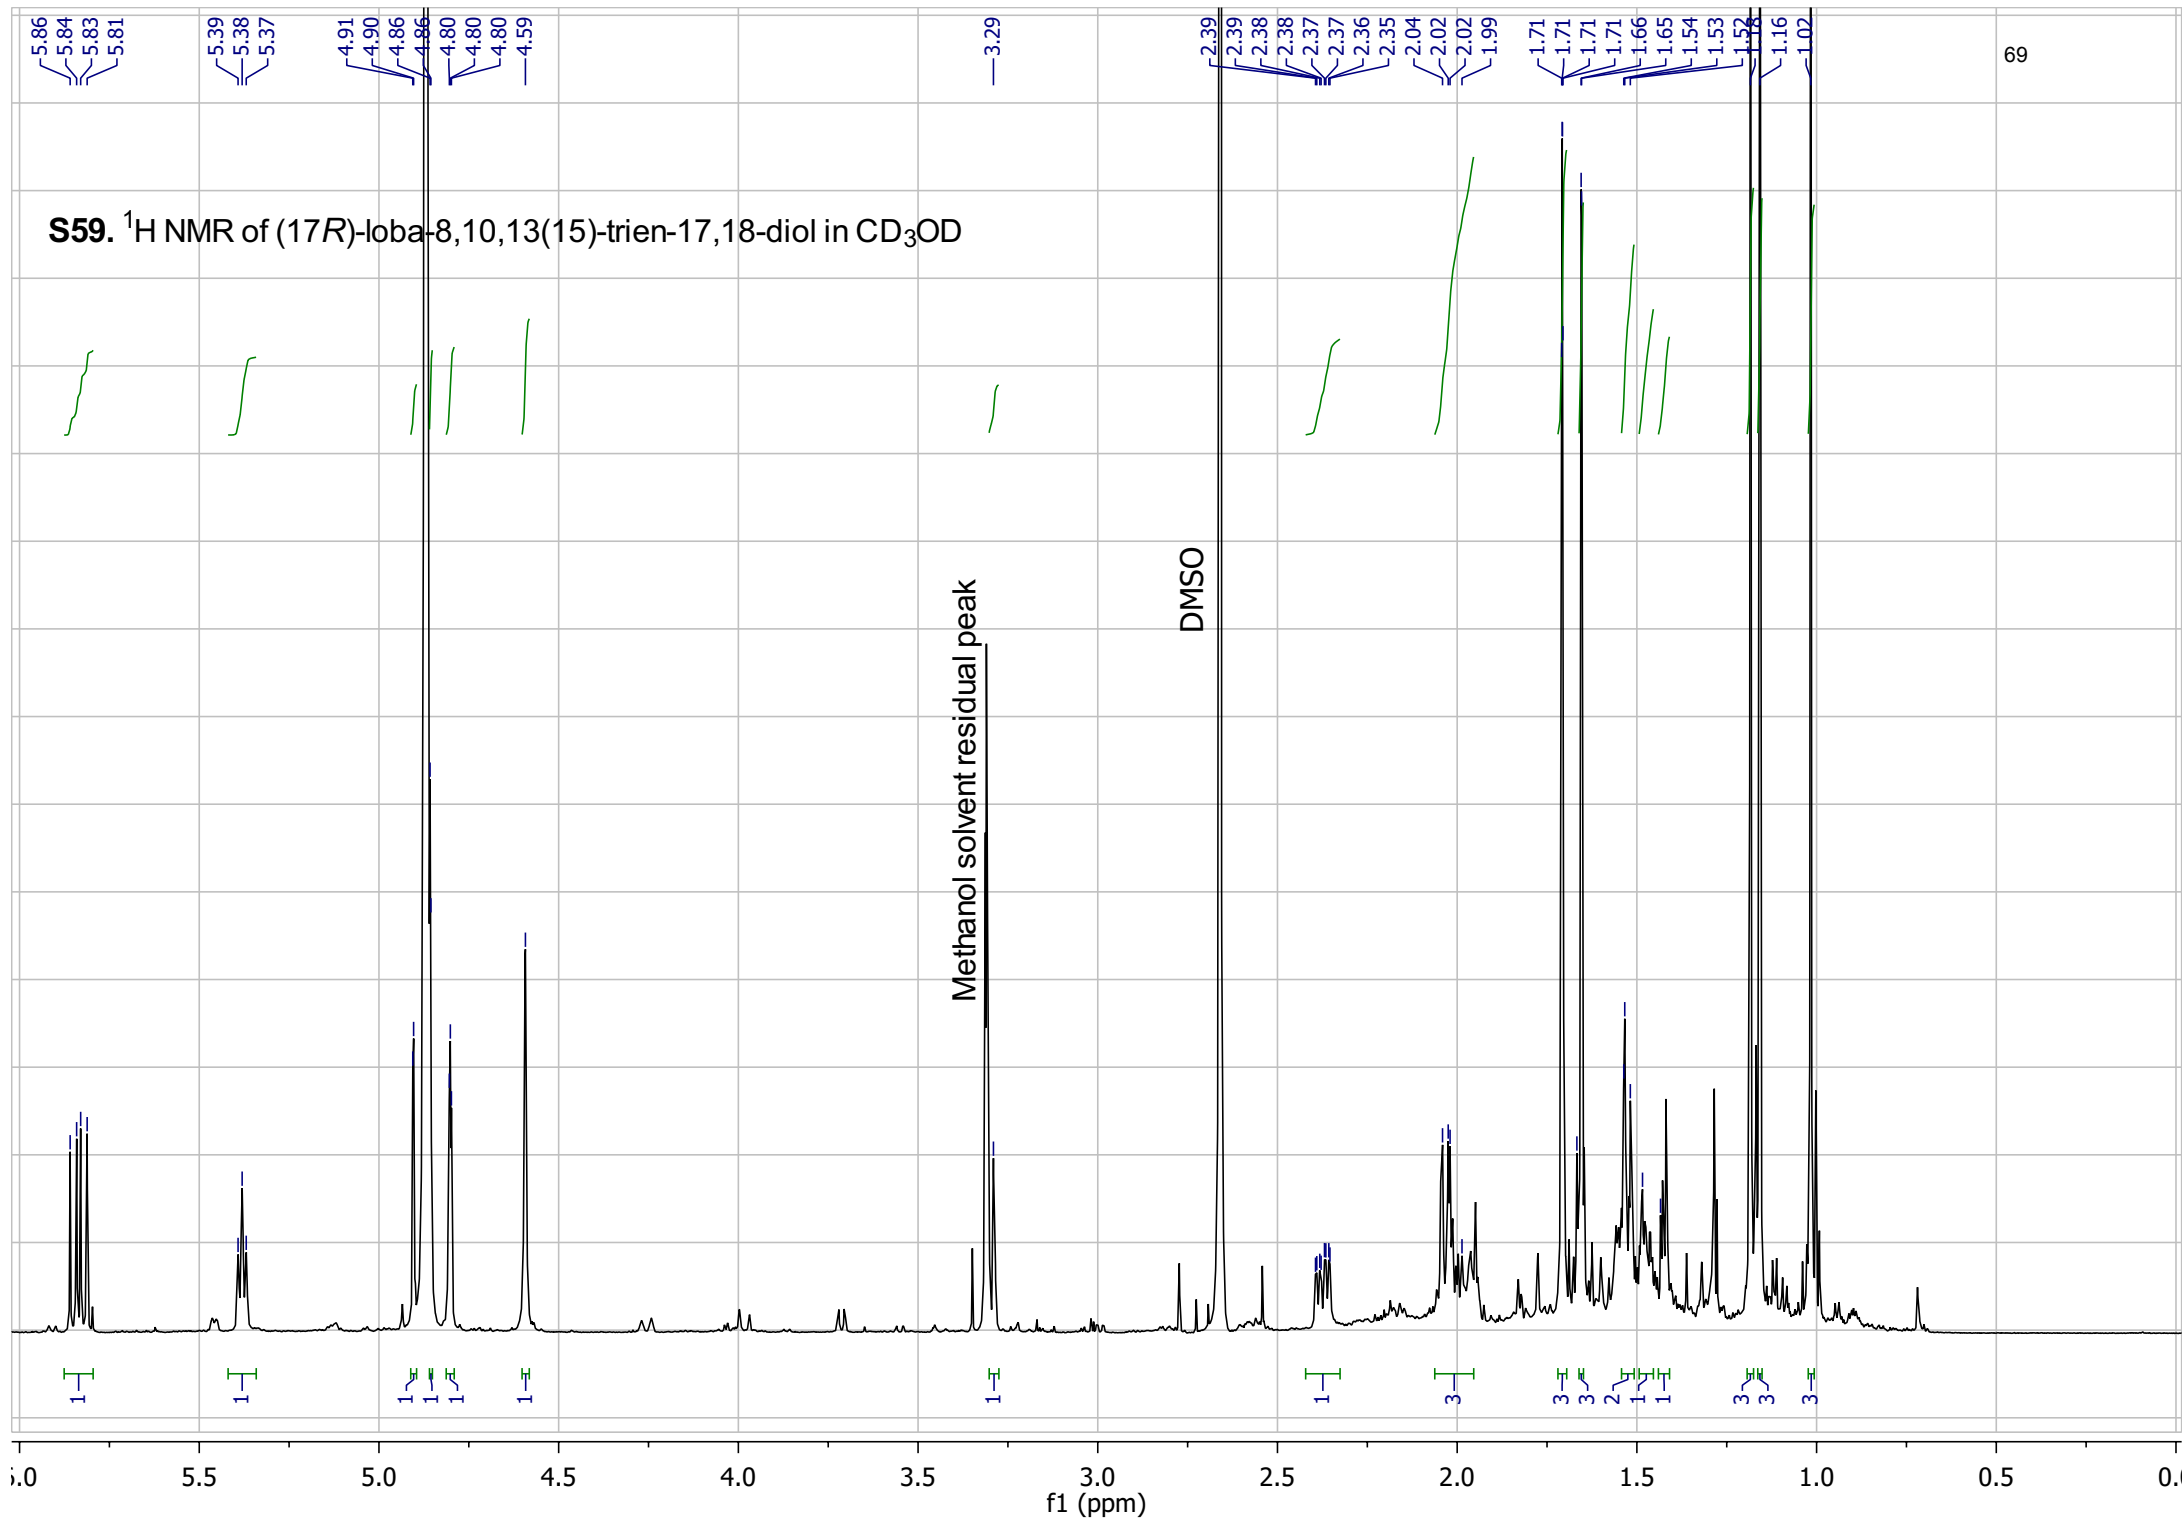

**S60.**  $^{13}\text{C}$  NMR of (17*R*)-loba-8,10,13(15)-trien-17,18-diol in  $\text{CD}_3\text{OD}$

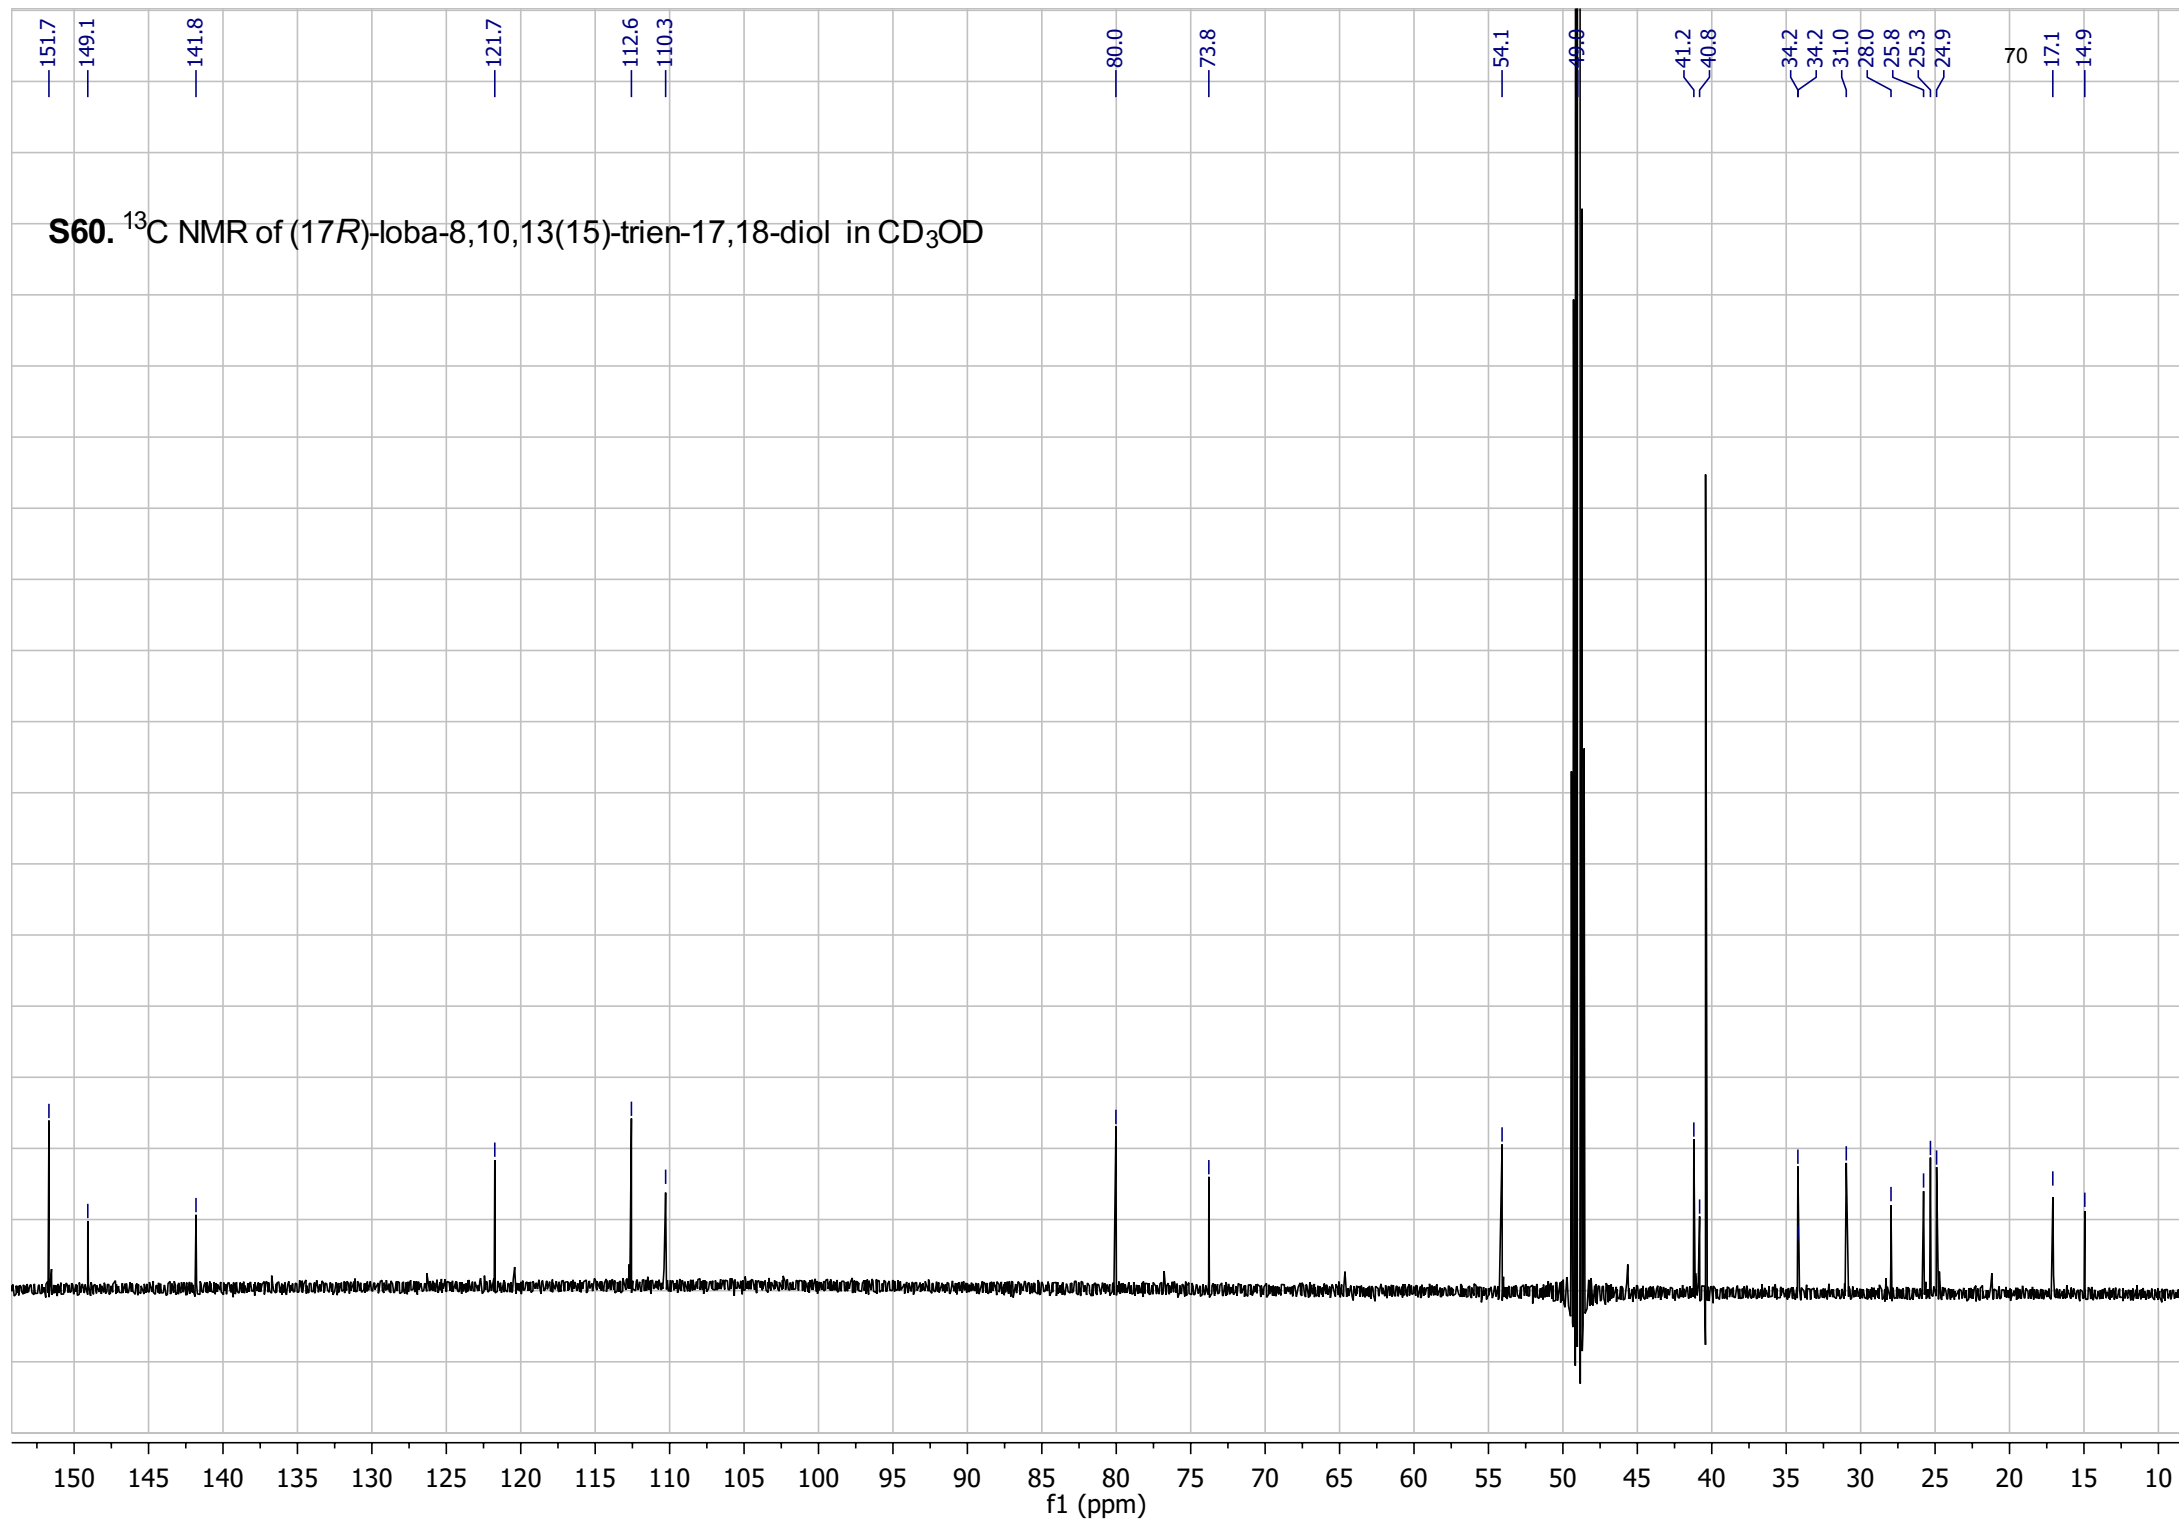

S61. COSY NMR of (17*R*)-loba-8,10,13(15)-trien-17,18-diol in CD<sub>3</sub>OD

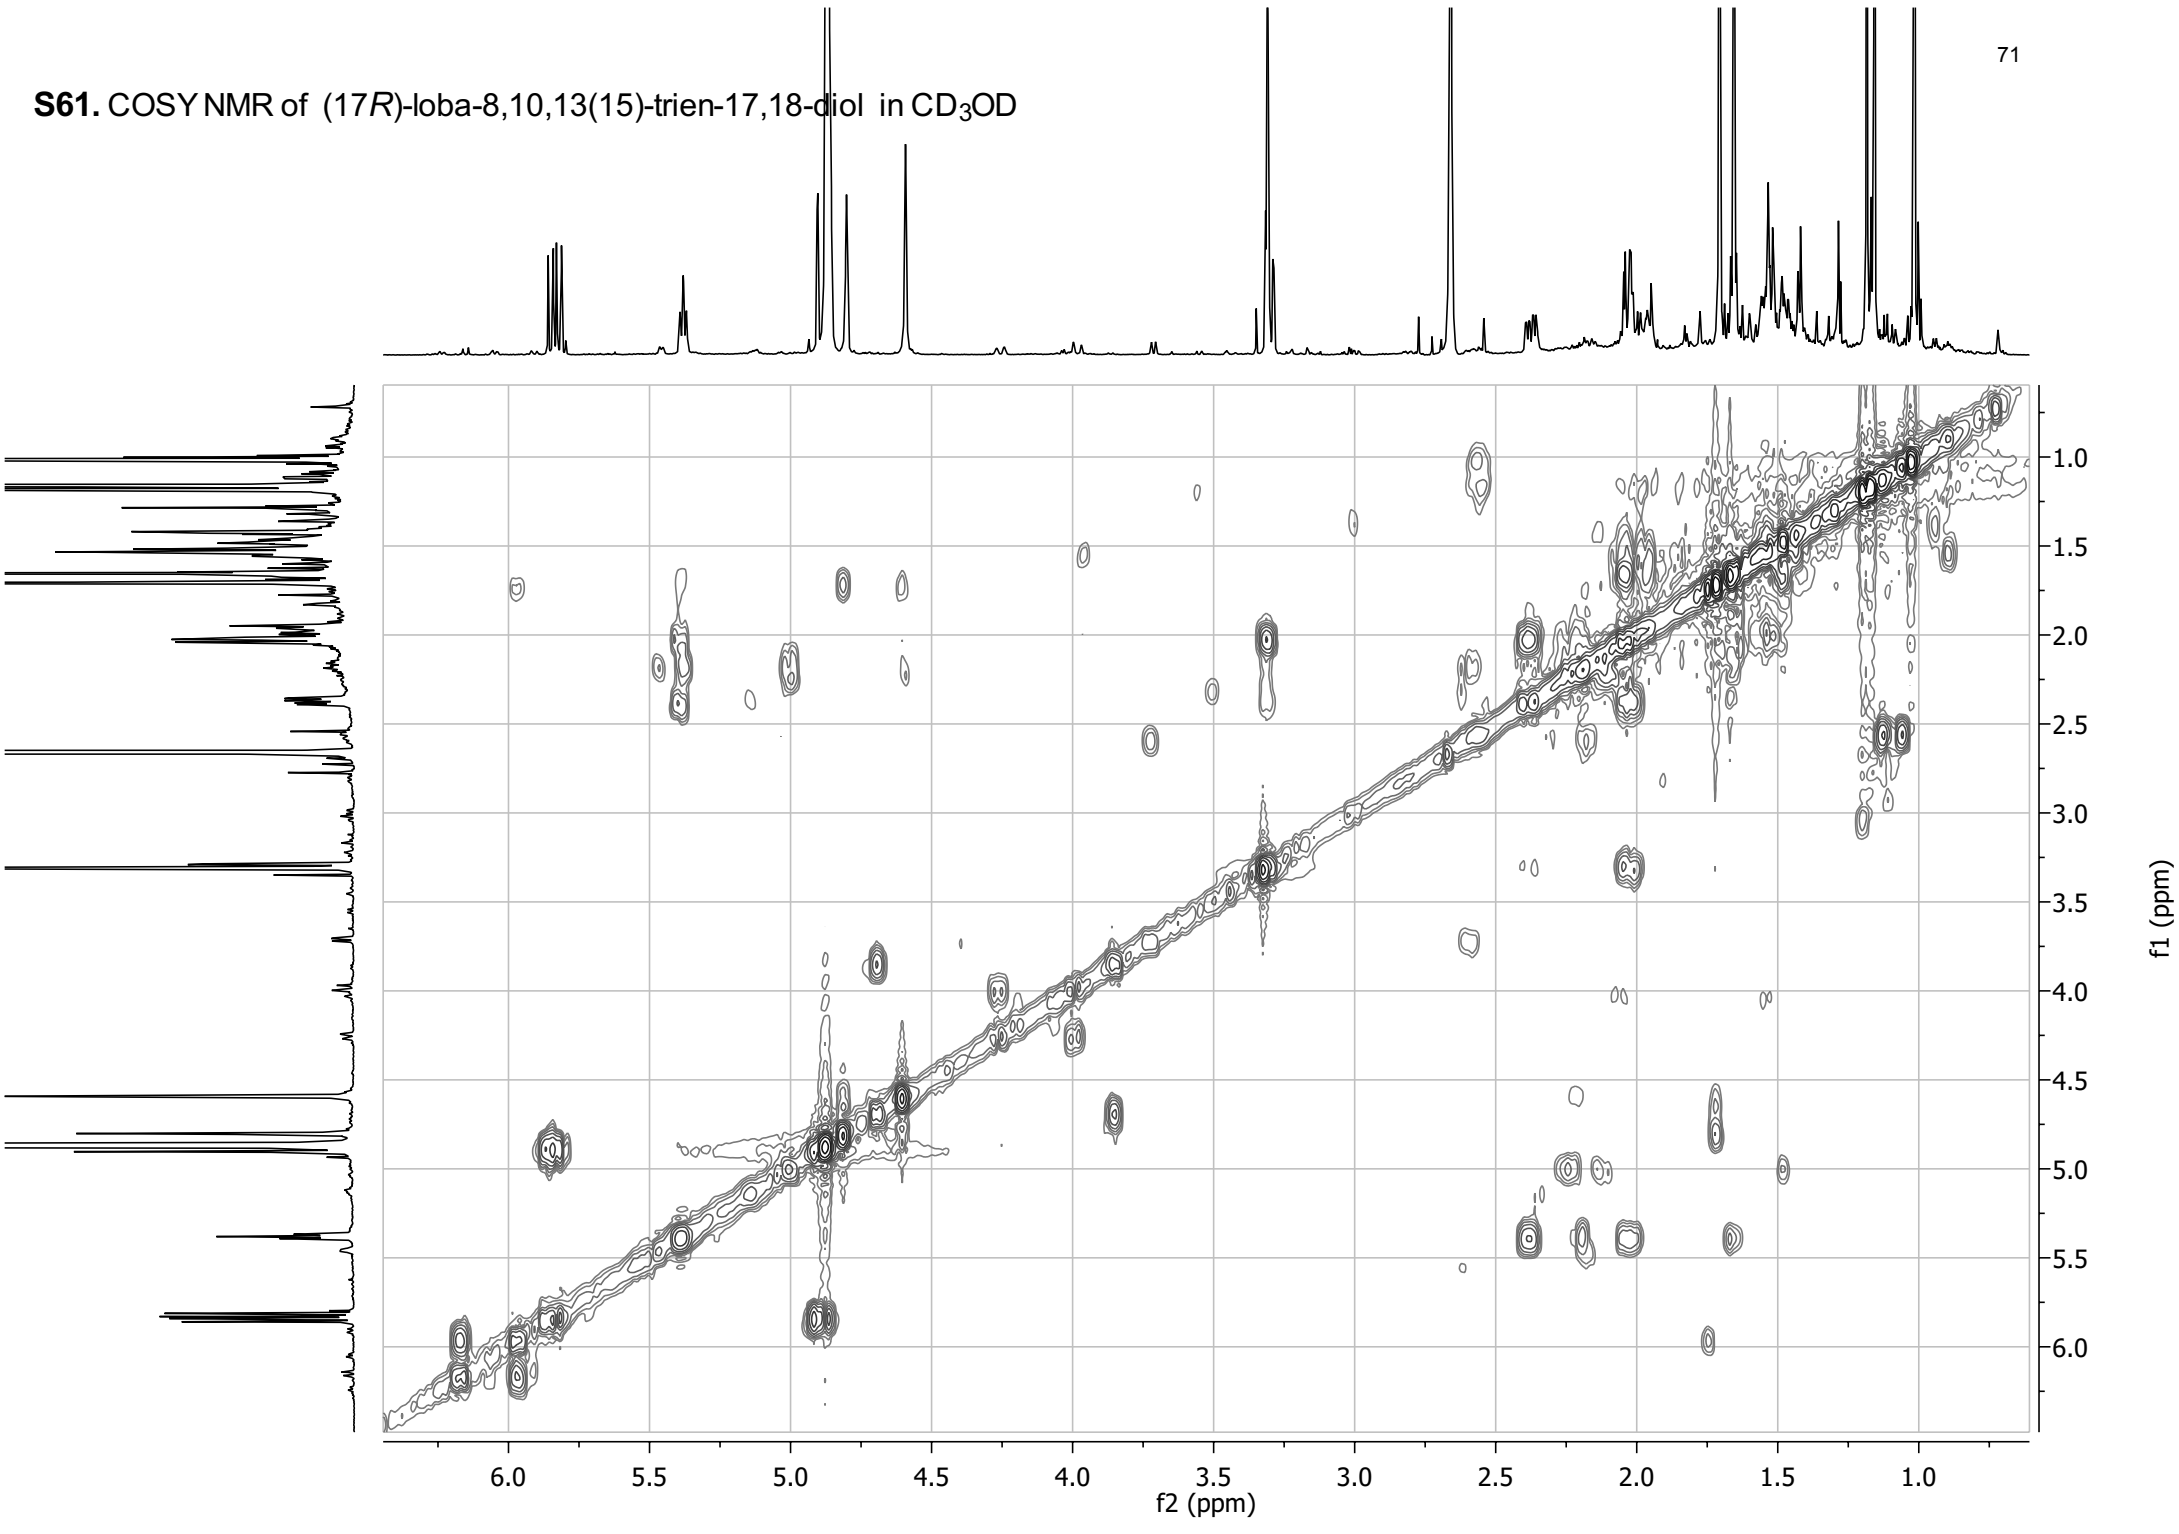

S62. HSQC NMR of (17*R*)-loba-8,10,13(15)-trien-17,18-diol in CD<sub>3</sub>OD

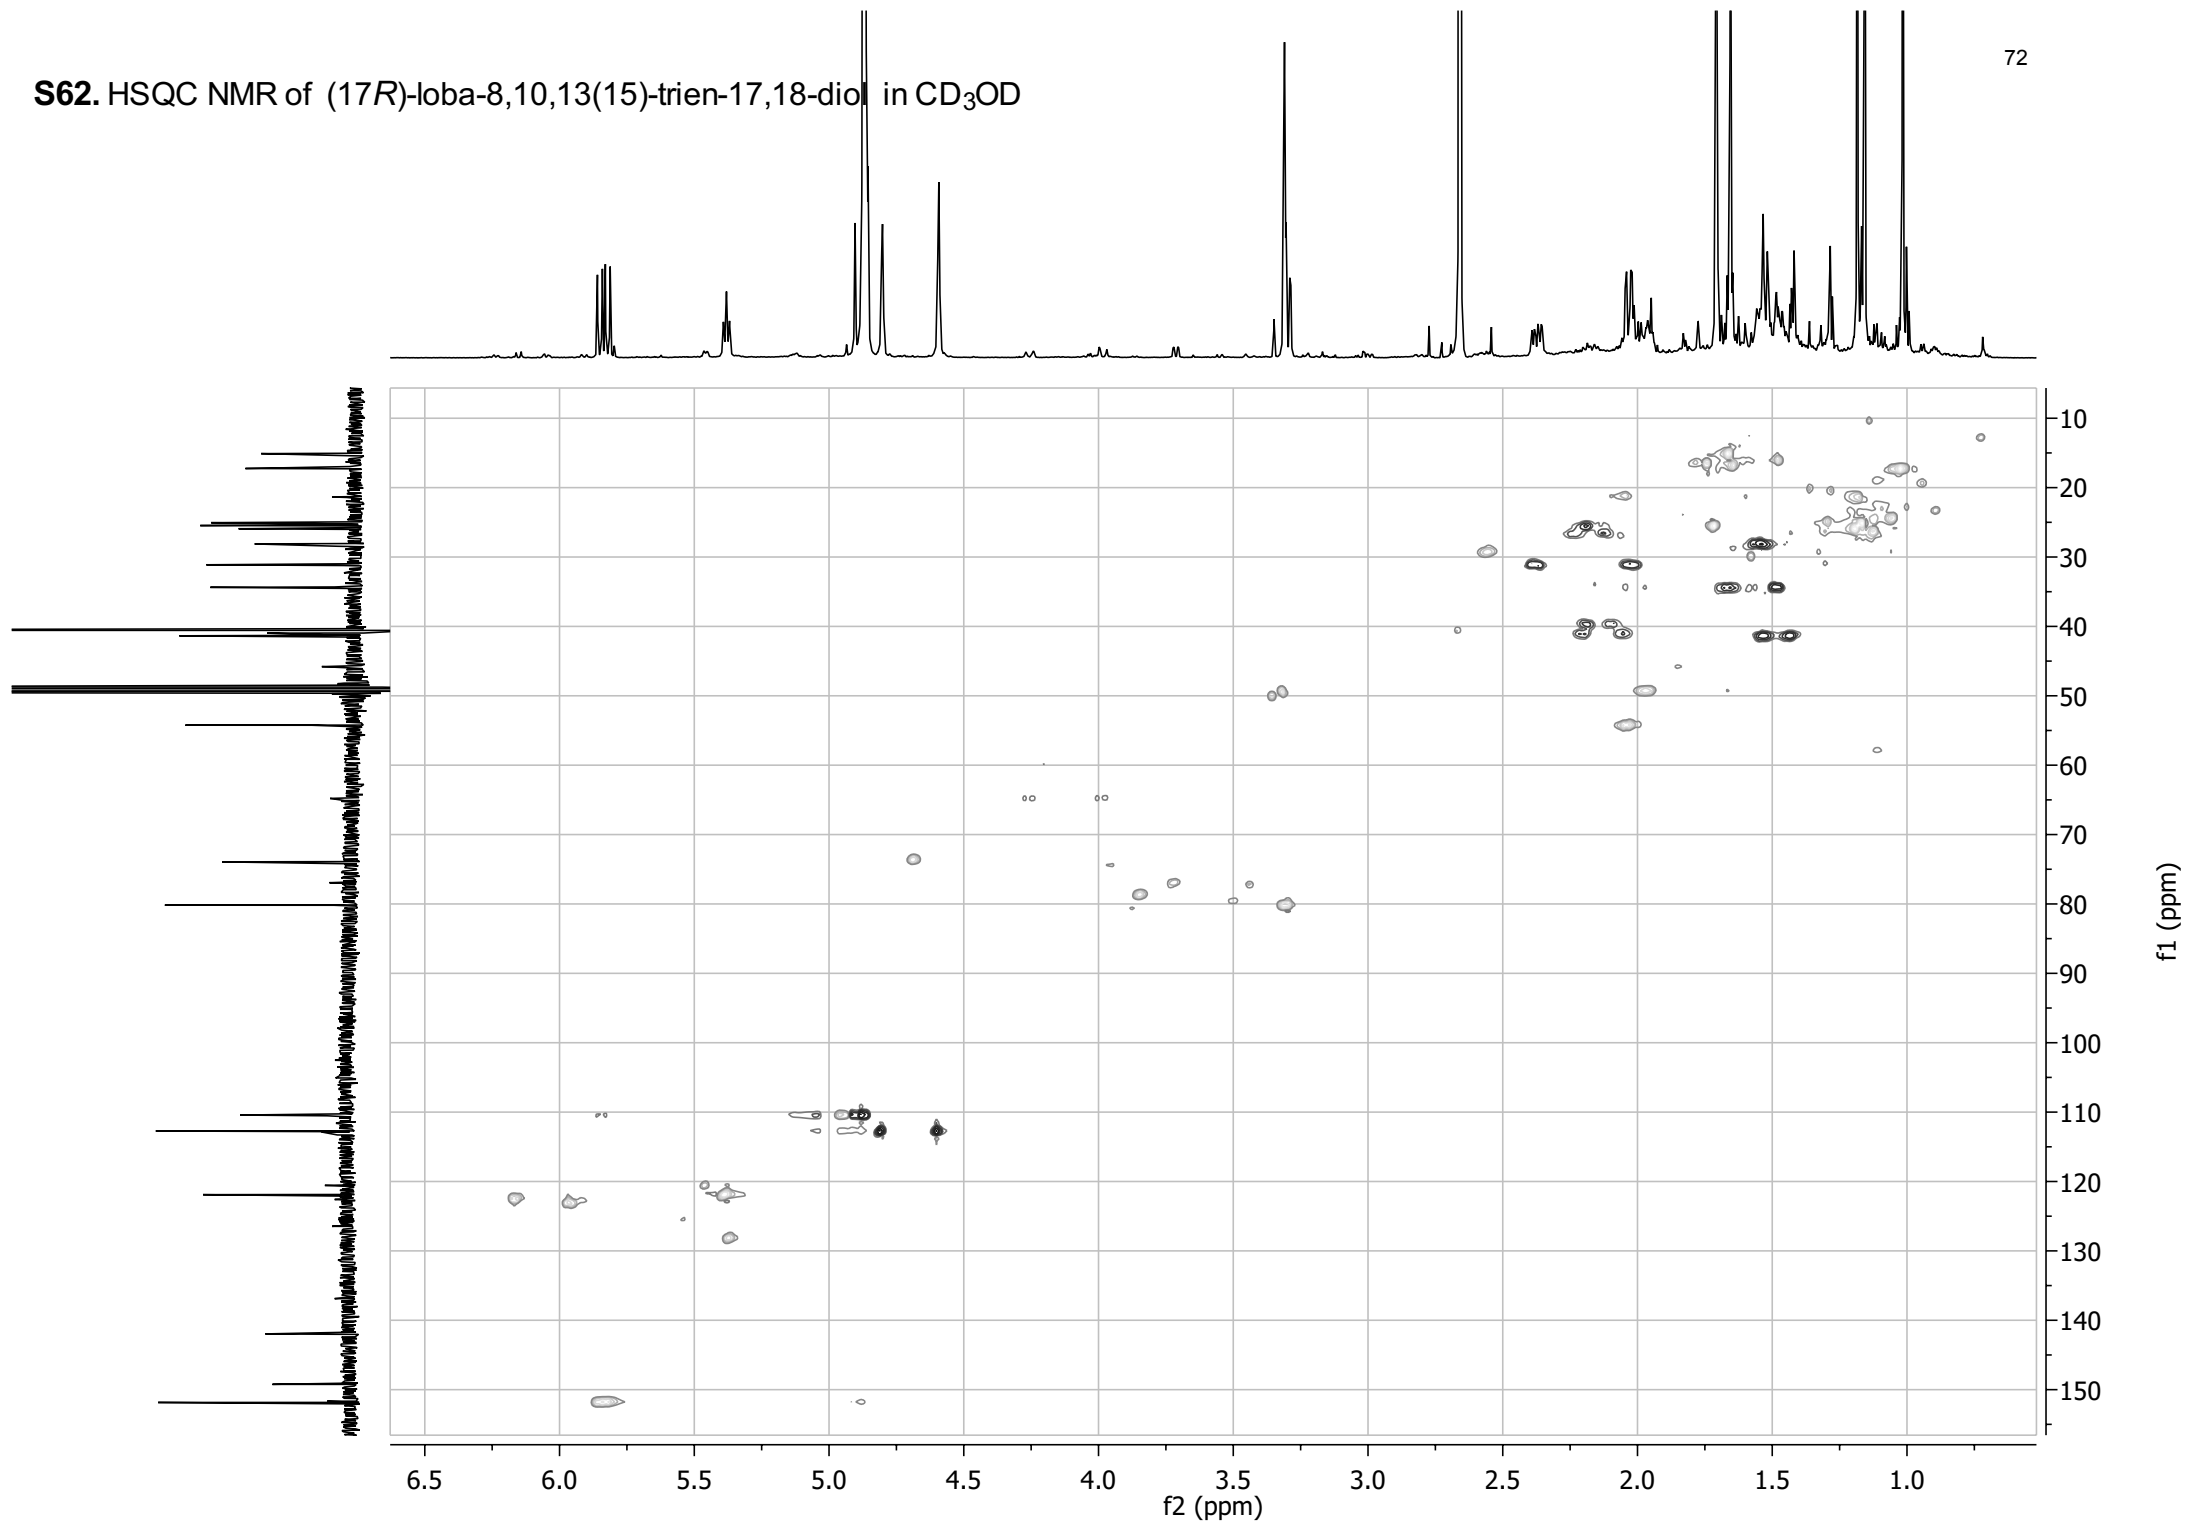



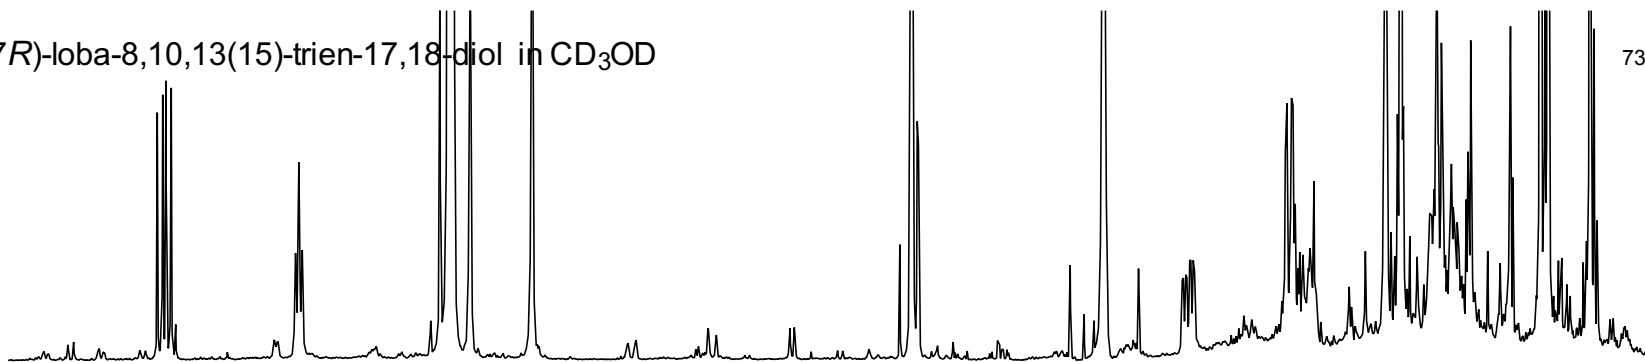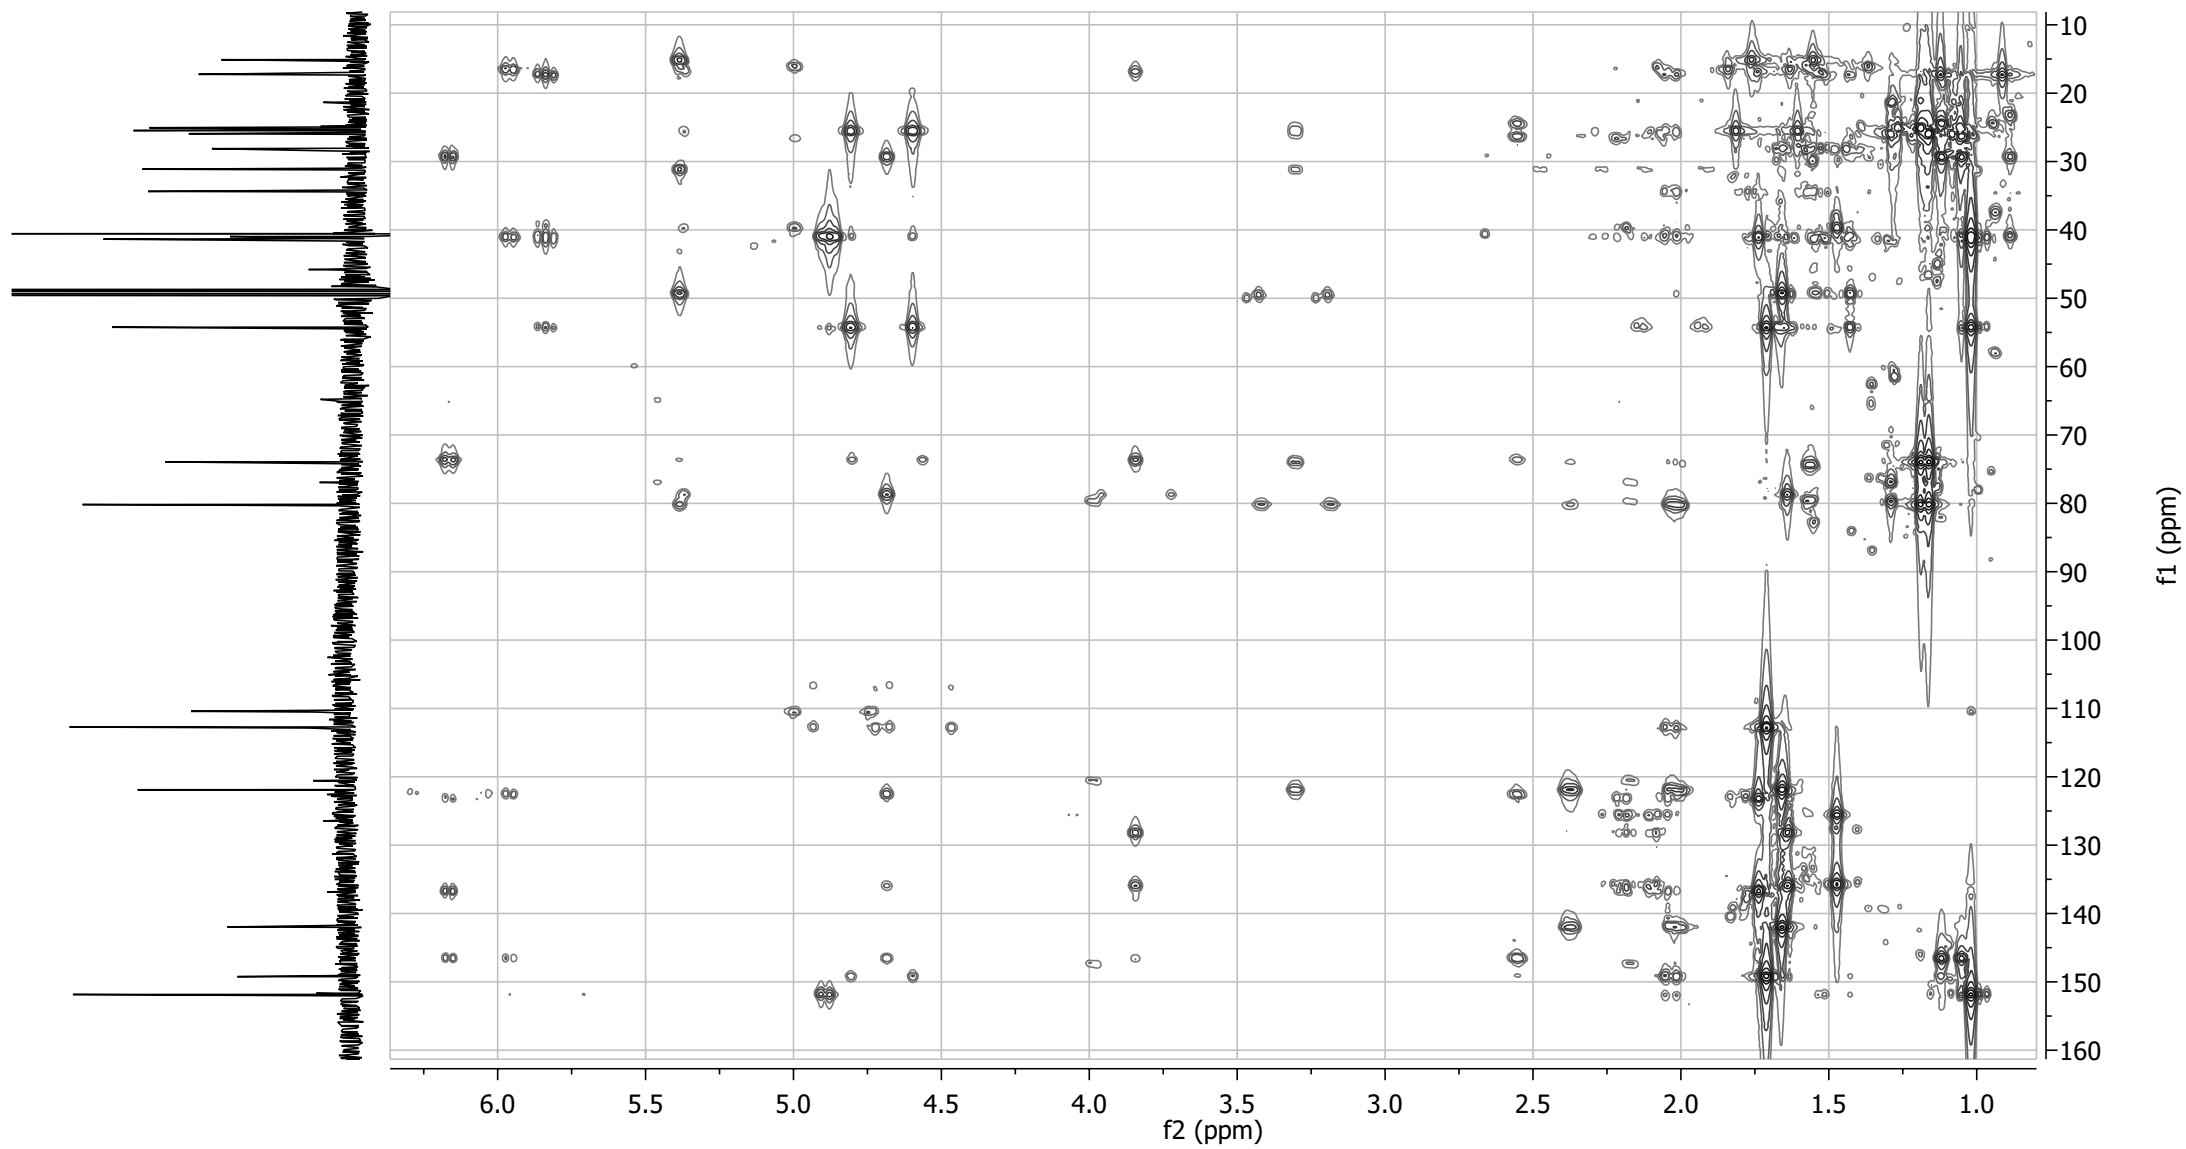

**Table S6.**  $^1\text{H}$  and  $^{13}\text{C}$  NMR data (300 MHz and 75 MHz,  $\text{CD}_3\text{OD}$ ) for (17*R*)-loba-8,10,13(15)-trien-17,18-diol.

| <b>o.</b> | <b><math>^{13}\text{C}</math><br/><math>\delta</math> (m)</b> | <b><math>^1\text{H}</math><br/><math>\delta</math> (m, J Hz)</b> | <b>COSY</b>                                                                      | <b>gHMBC</b>                                     |
|-----------|---------------------------------------------------------------|------------------------------------------------------------------|----------------------------------------------------------------------------------|--------------------------------------------------|
| 1         | 40.8 (s)                                                      |                                                                  |                                                                                  |                                                  |
| 2         | 54.1(d)                                                       | 2.03 (1H, dd, 3.1, 12.6)                                         | H-3                                                                              | C-1, C-2, C-4, C-7, C-10, C-11, C-12             |
| 3         | 34.2 (t)                                                      | 1.67 (1H, m)<br>1.48 (1H, m)                                     | H-2, H <sub>b</sub> -3, H-4<br>H <sub>a</sub> -3                                 | C-1, C-2, C-4, C-5<br>C-2, C-5                   |
| 4         | 49.3 (d)                                                      | 1.98 (1H, m)                                                     | H <sub>a</sub> -3, H-5                                                           | C-3, C-6, C-13, C-15                             |
| 5         | 28.0 (t)                                                      | 1.54 (2H, m)                                                     | H-4, H <sub>b</sub> -6                                                           | C-3, C-6, C-4, C-14                              |
| 6         | 41.2 (t)                                                      | 1.53 (1H, m)<br>1.43 (1H, m)                                     | H <sub>b</sub> -6<br>H-4, H <sub>a</sub> -6                                      | C-5, C-7, C-8<br>C-1, C-2, C-4, C-7, C-8, C-10   |
| 7         | 17.1 (q)                                                      | 1.02 (3H, s)                                                     |                                                                                  | C-1, C-2, C-6, C-8                               |
| 8         | 151.7 (d)                                                     | 5.84 (1H, 10.8, 17.6)                                            | H <sub>a</sub> -9                                                                | C-1, C-2, C-6, C-7, C-8                          |
| 9         | 110.3 (t)                                                     | 4.90 (1H, d, 1.4, 17.6)<br>4.86 (1H, t, 1.4, 10.8)               | H-8, H <sub>b</sub> -9<br>H-8, H <sub>b</sub> -9                                 | C-1, C-2, C-8<br>C-1, C-2, C-8                   |
| 10        | 149.1 (s)                                                     |                                                                  |                                                                                  |                                                  |
| 11        | 112.6 (t)                                                     | 4.80 (1H, dq, 1.4, 3.2)<br>4.59 (1H, brs)                        | H <sub>b</sub> -11, H <sub>3</sub> -12<br>H <sub>a</sub> -11, H <sub>3</sub> -12 | C-1, C-2, C-10, C-12<br>C-1, C-2, C-10, C-12     |
| 12        | 25.3 (q)                                                      | 1.71 (3H, brdd, 0.8, 1.4)                                        | H <sub>a</sub> -11, H <sub>b</sub> -11                                           | C-1, C-2, C-10, C-11                             |
| 13        | 141.8 (s)                                                     |                                                                  |                                                                                  |                                                  |
| 14        | 15.0 (q)                                                      | 1.66 (3H, brd, 0.8)                                              | H-15                                                                             | C-4, C-13, C-15                                  |
| 15        | 121.7(d)                                                      | 5.38 (1H, ddq, 0.8, 6.3, 7.3)                                    | H-4, H-14, H-16, H-17                                                            | C-4, C-14, C-16, C-17                            |
| 16        | 31.0 (t)                                                      | 2.37 (1H, ddd, 2.4, 7.3, 14.8)<br>2.03 (1H, m)                   | H-15, H <sub>b</sub> -16, H-17<br>H-15, H <sub>a</sub> -16, H-17, H-14           | C-13, C-15, C-17, C-18<br>C-13, C-15, C-17, C-18 |
| 17        | 80.0 (d)                                                      | 3.29 (1H, d, 2.4)                                                | H <sub>a</sub> -16, H <sub>b</sub> -16                                           | C-15, C-16, C-18, C-19, C-20                     |
| 18        | 73.8 (s)                                                      |                                                                  |                                                                                  |                                                  |
| 19        | 24.9 (q)                                                      | 1.16 (3H, s)                                                     |                                                                                  | C-17, C-18                                       |
| 20        | 25.8 (q)                                                      | 1.19 (3H, s)                                                     |                                                                                  | C-17, C-18                                       |



S65. <sup>13</sup>C NMR of sarcophytol-B in CD<sub>3</sub>OD

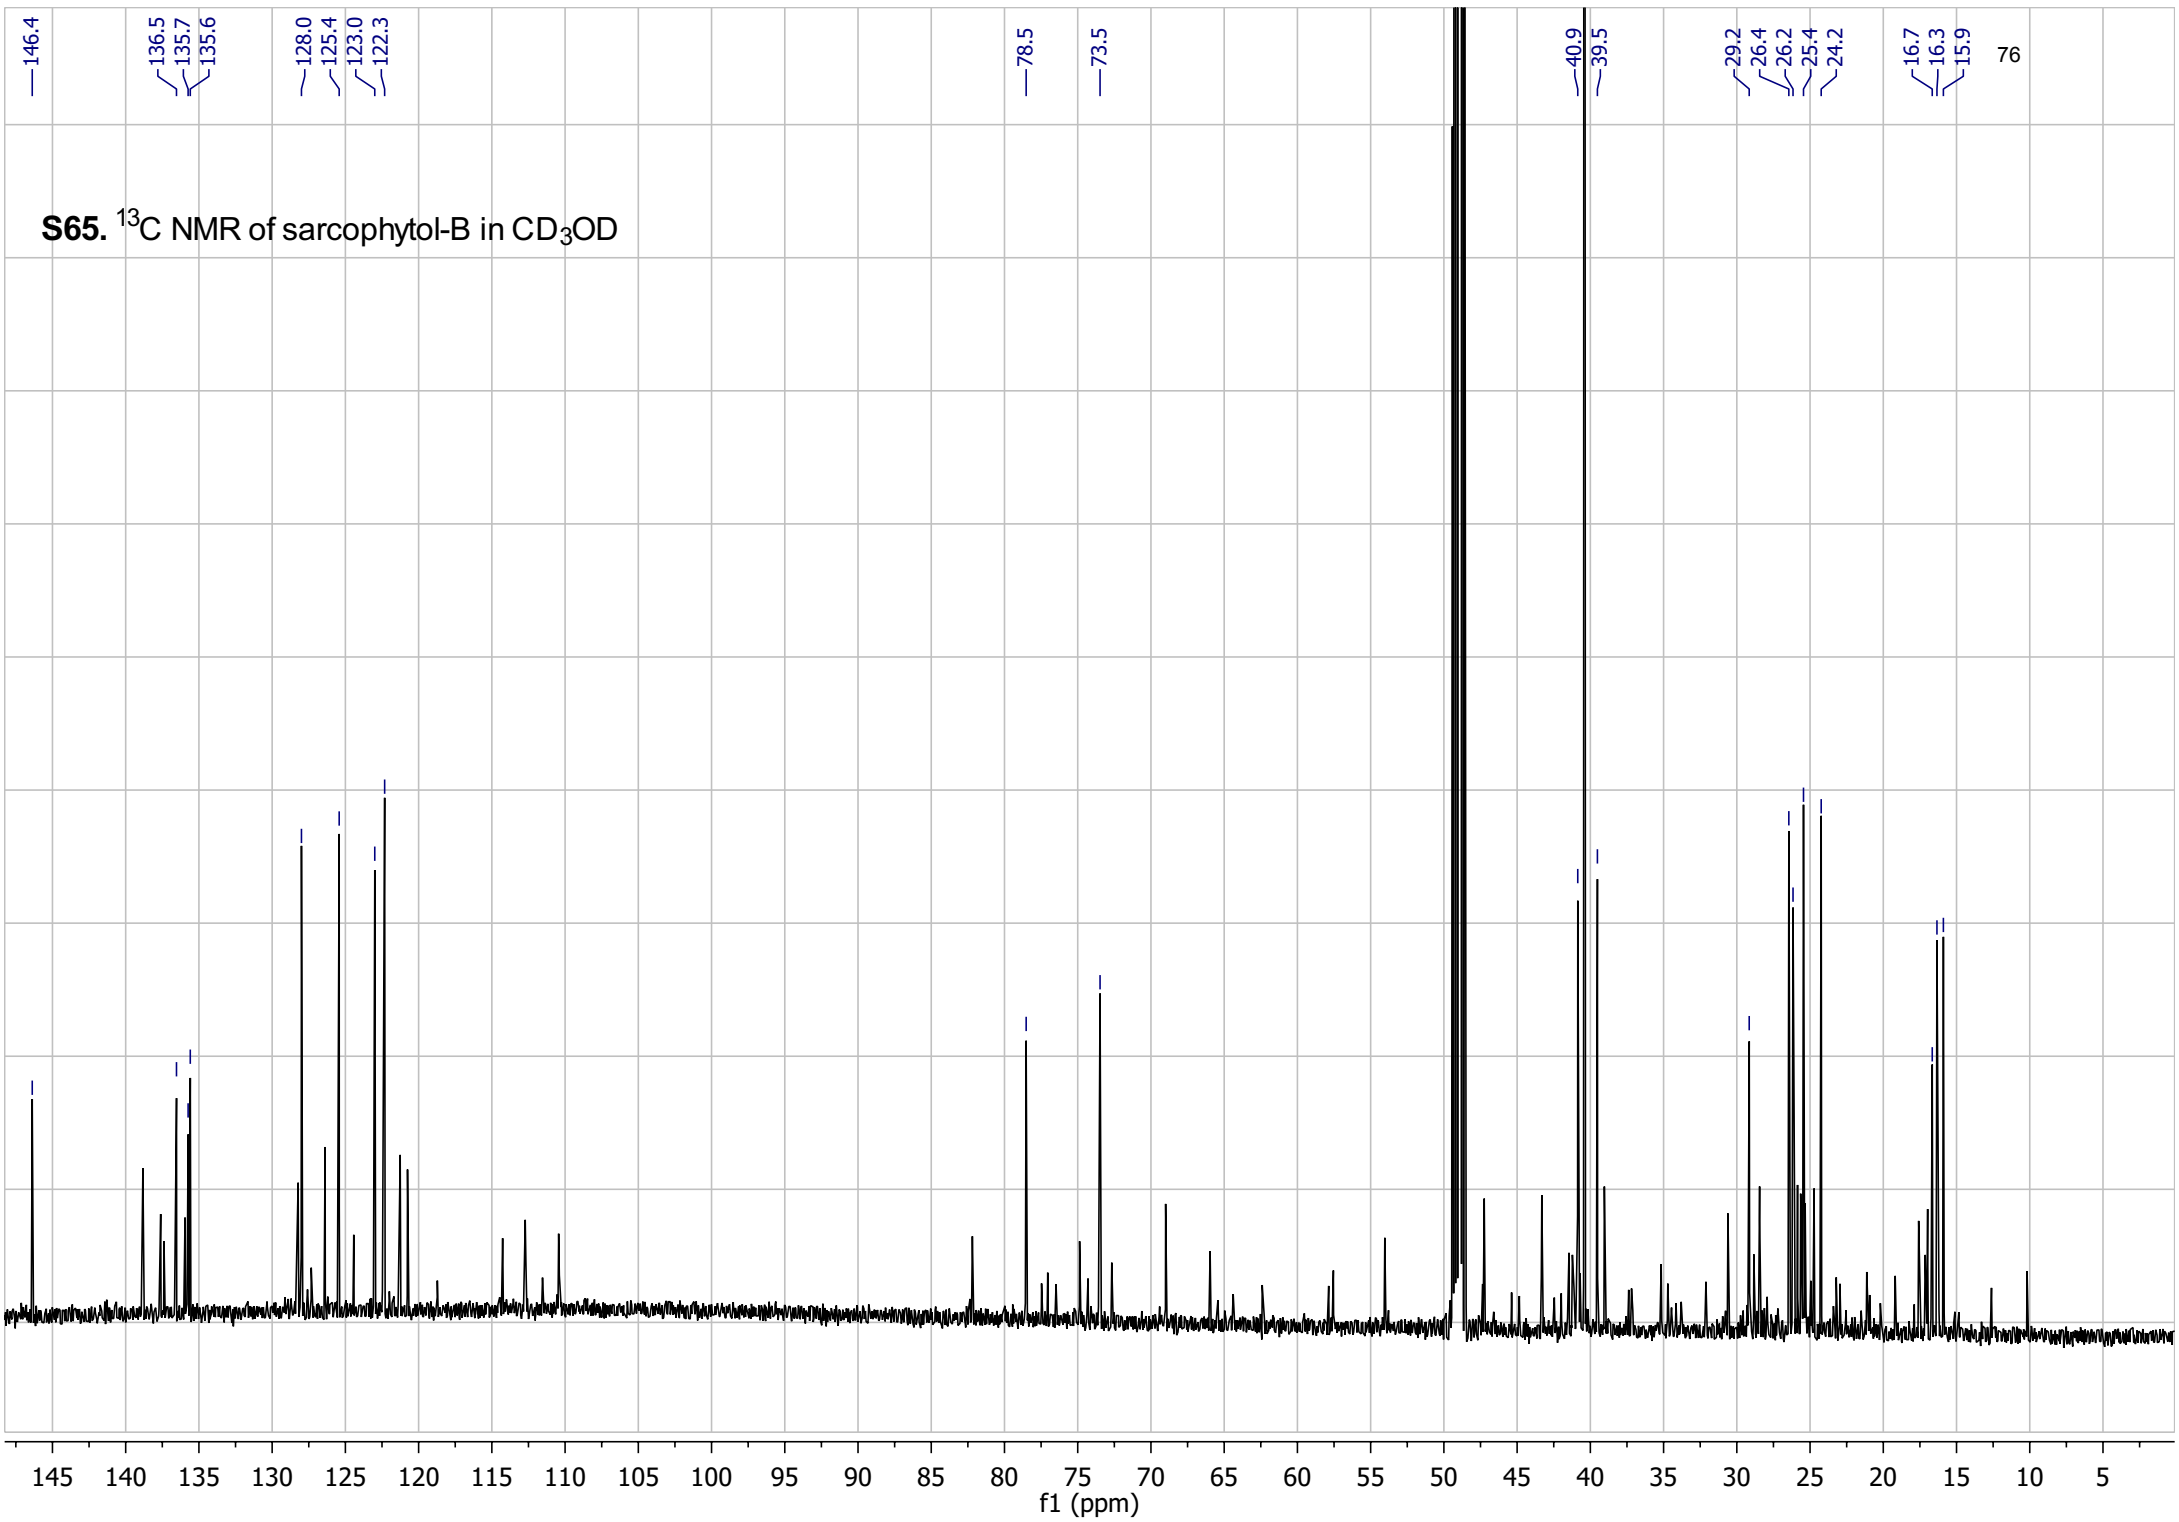

128.0  
125.4  
123.0  
122.3

78.5

73.5

40.9

40.4

39.5

29.2

26.5

26.2

25.4

24.2

77

16.7

15.9

S66. DEPT NMR of Isarcophytol-B in CD<sub>3</sub>OD

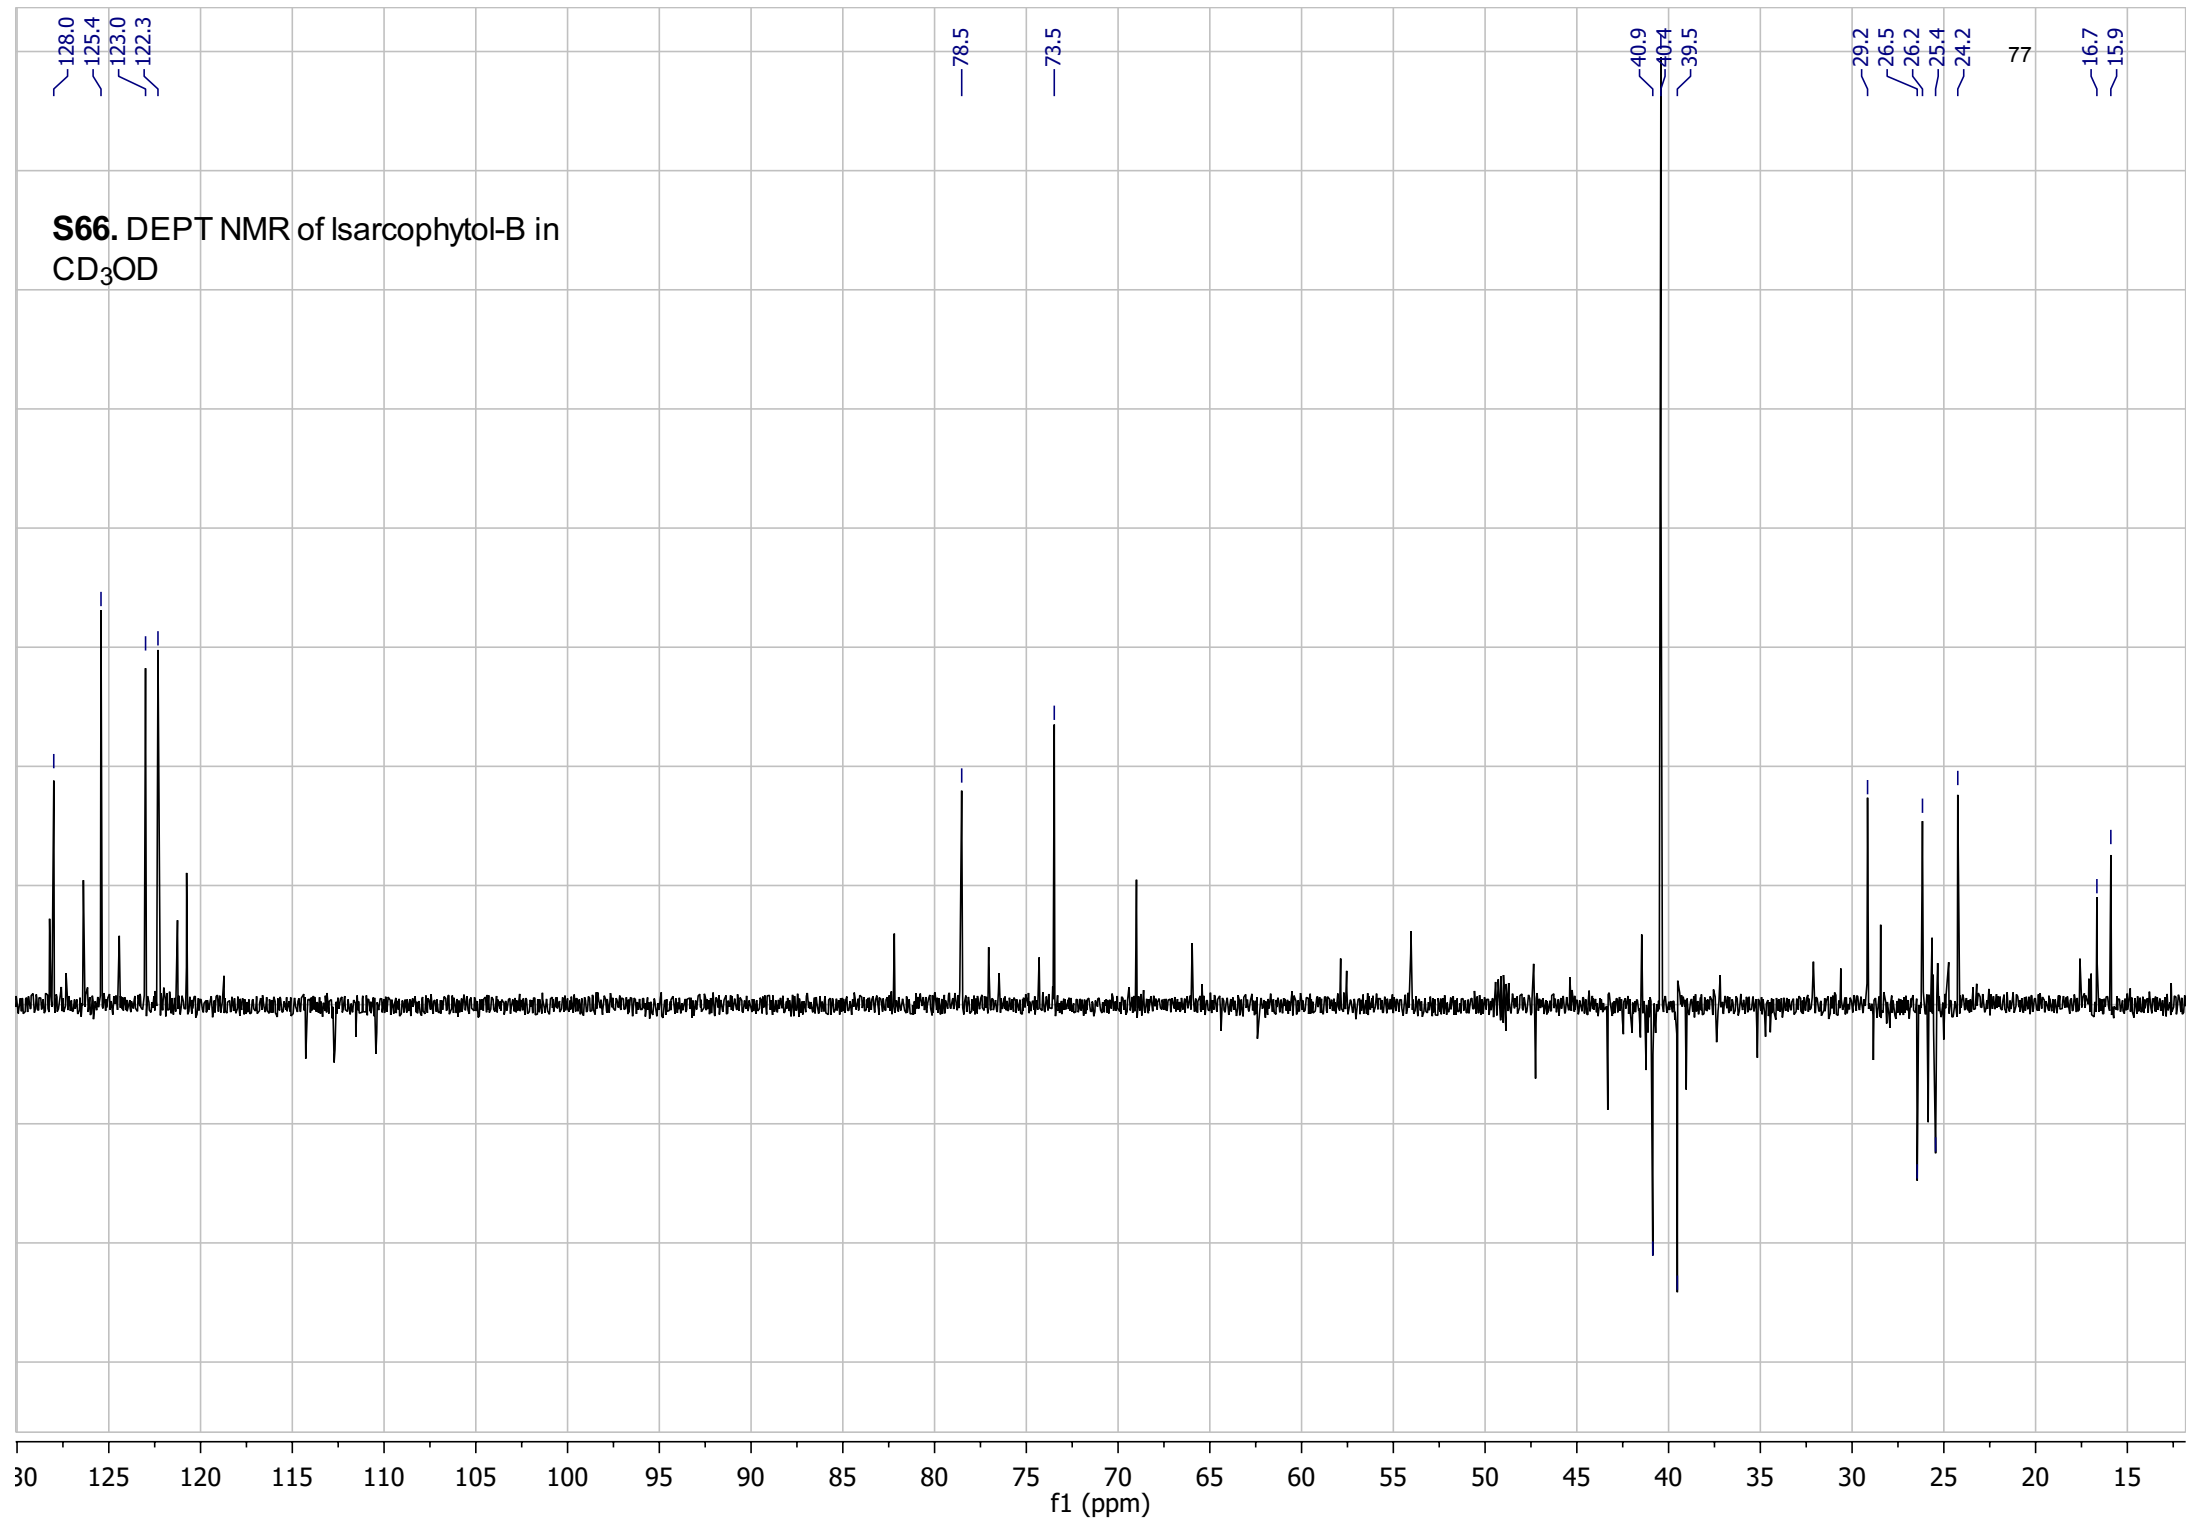

S67. COSY NMR of sarcophytol-B in CD<sub>3</sub>OD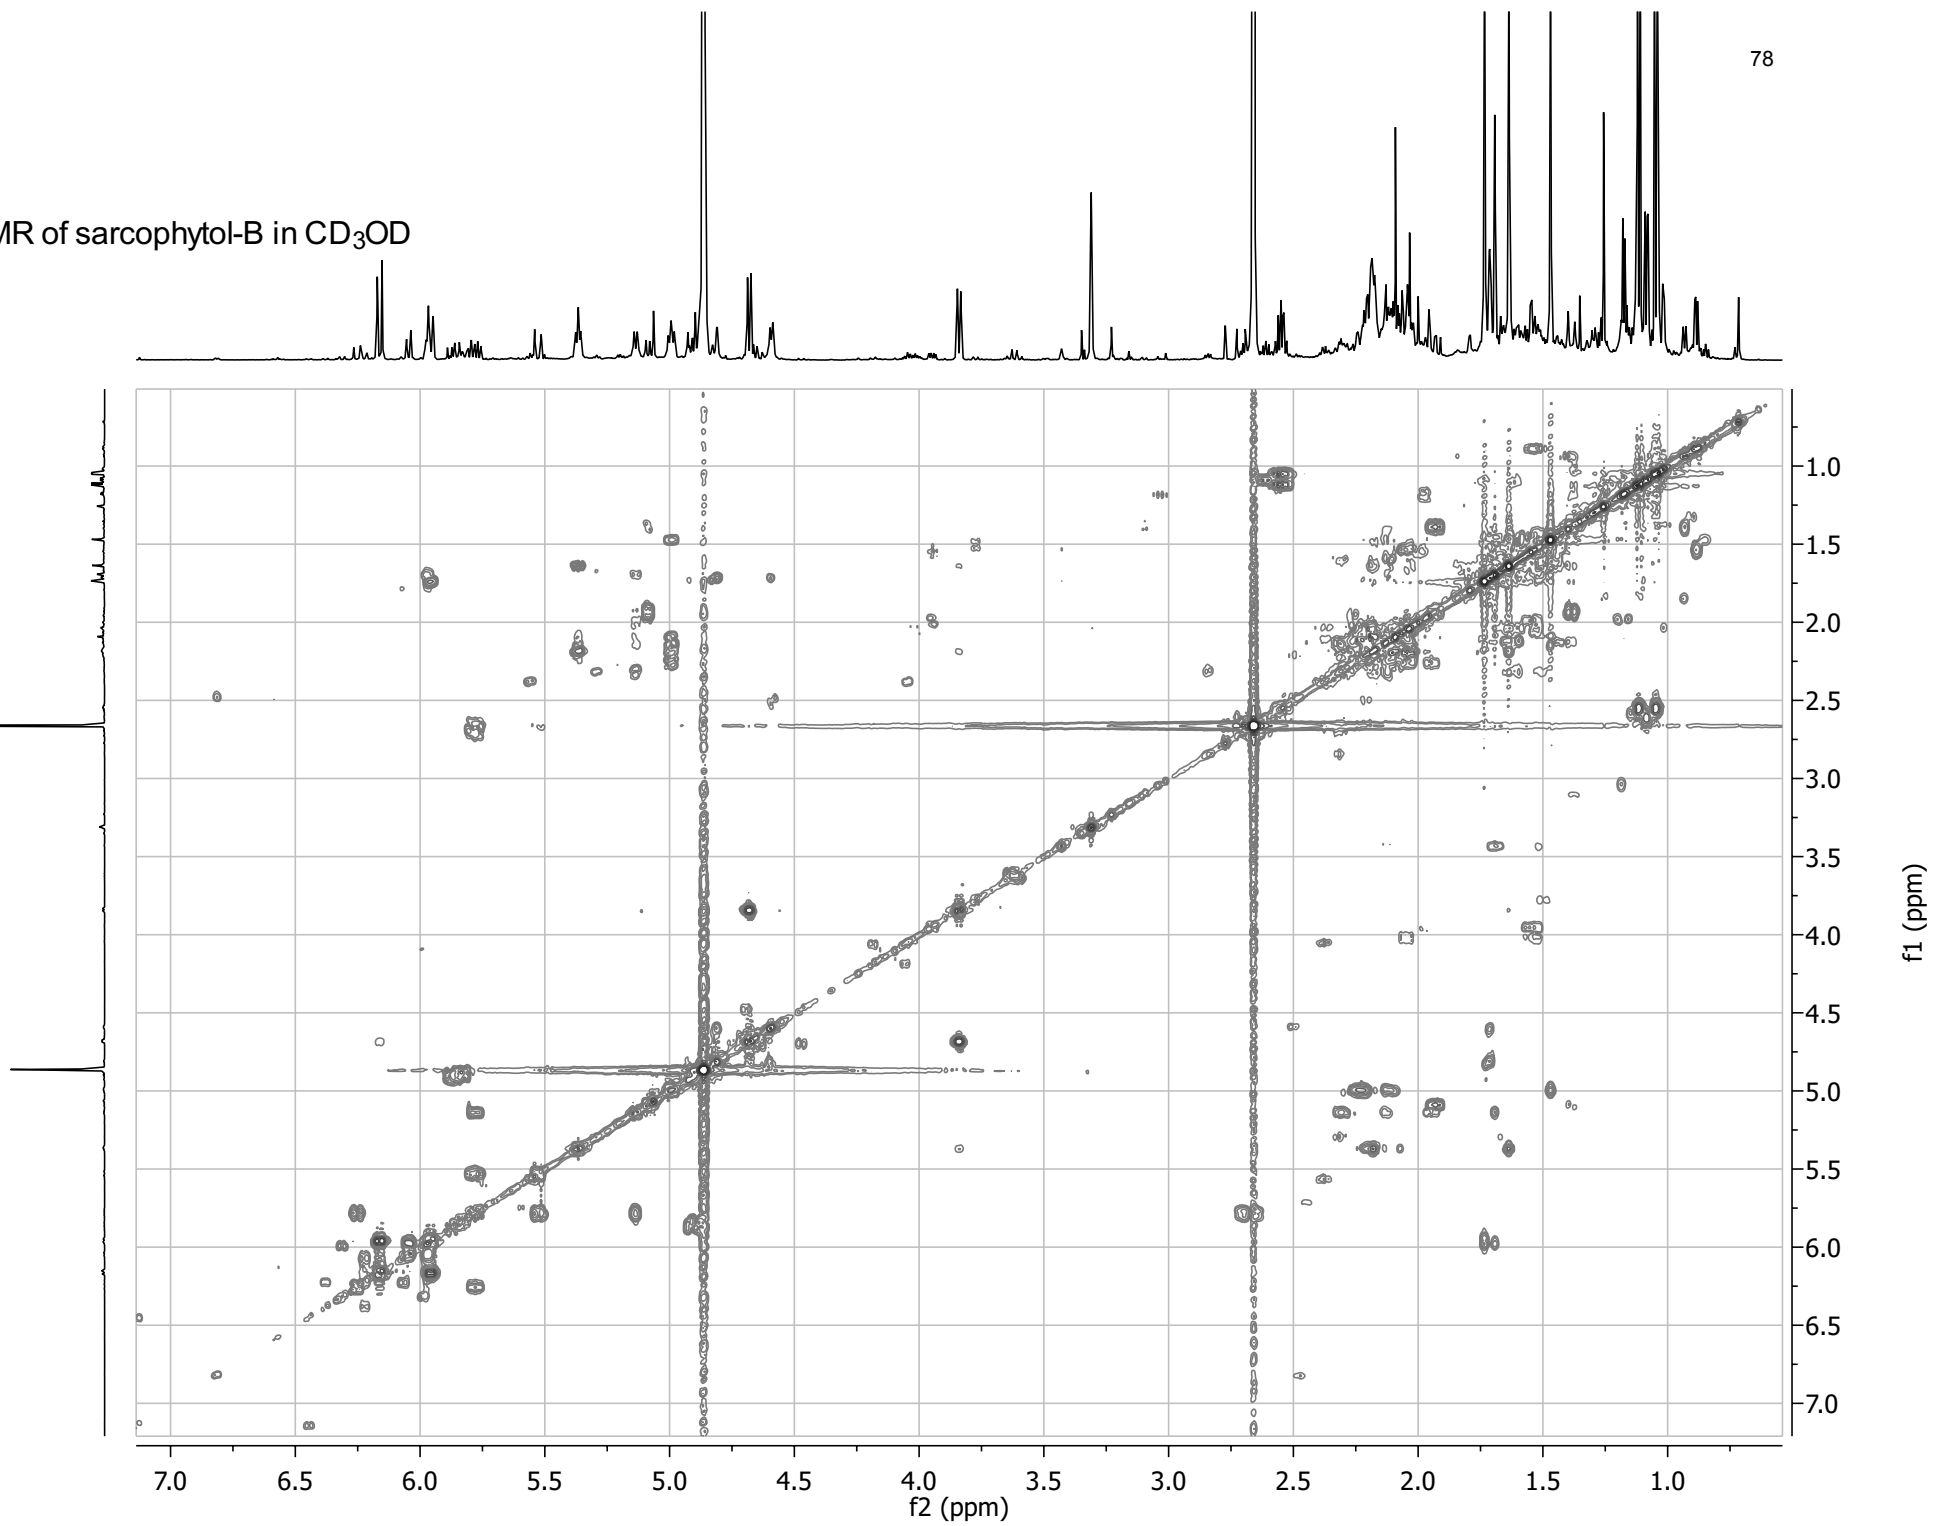

S68. HSQC NMR of sarcophytol-B in CD<sub>3</sub>OD

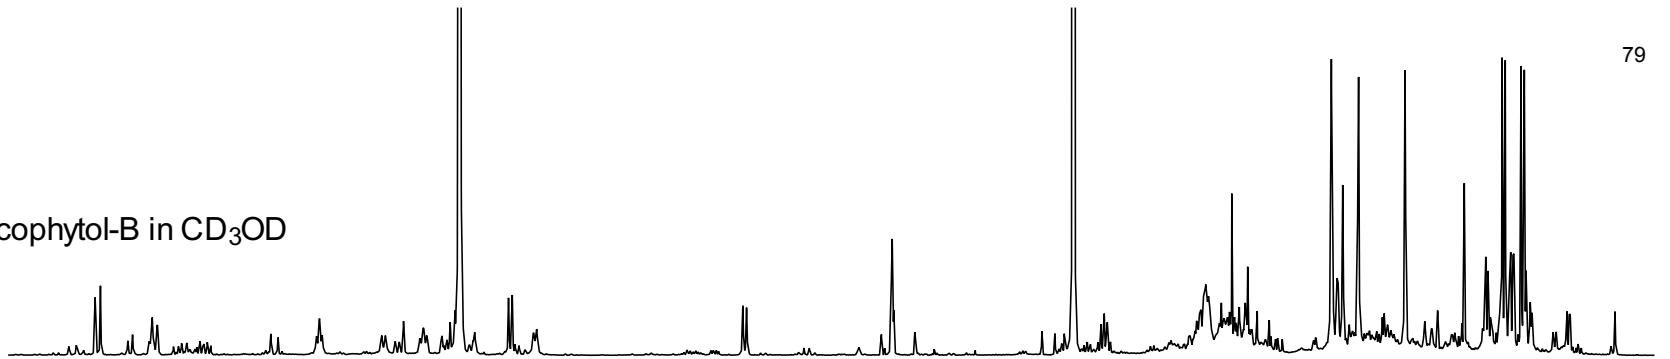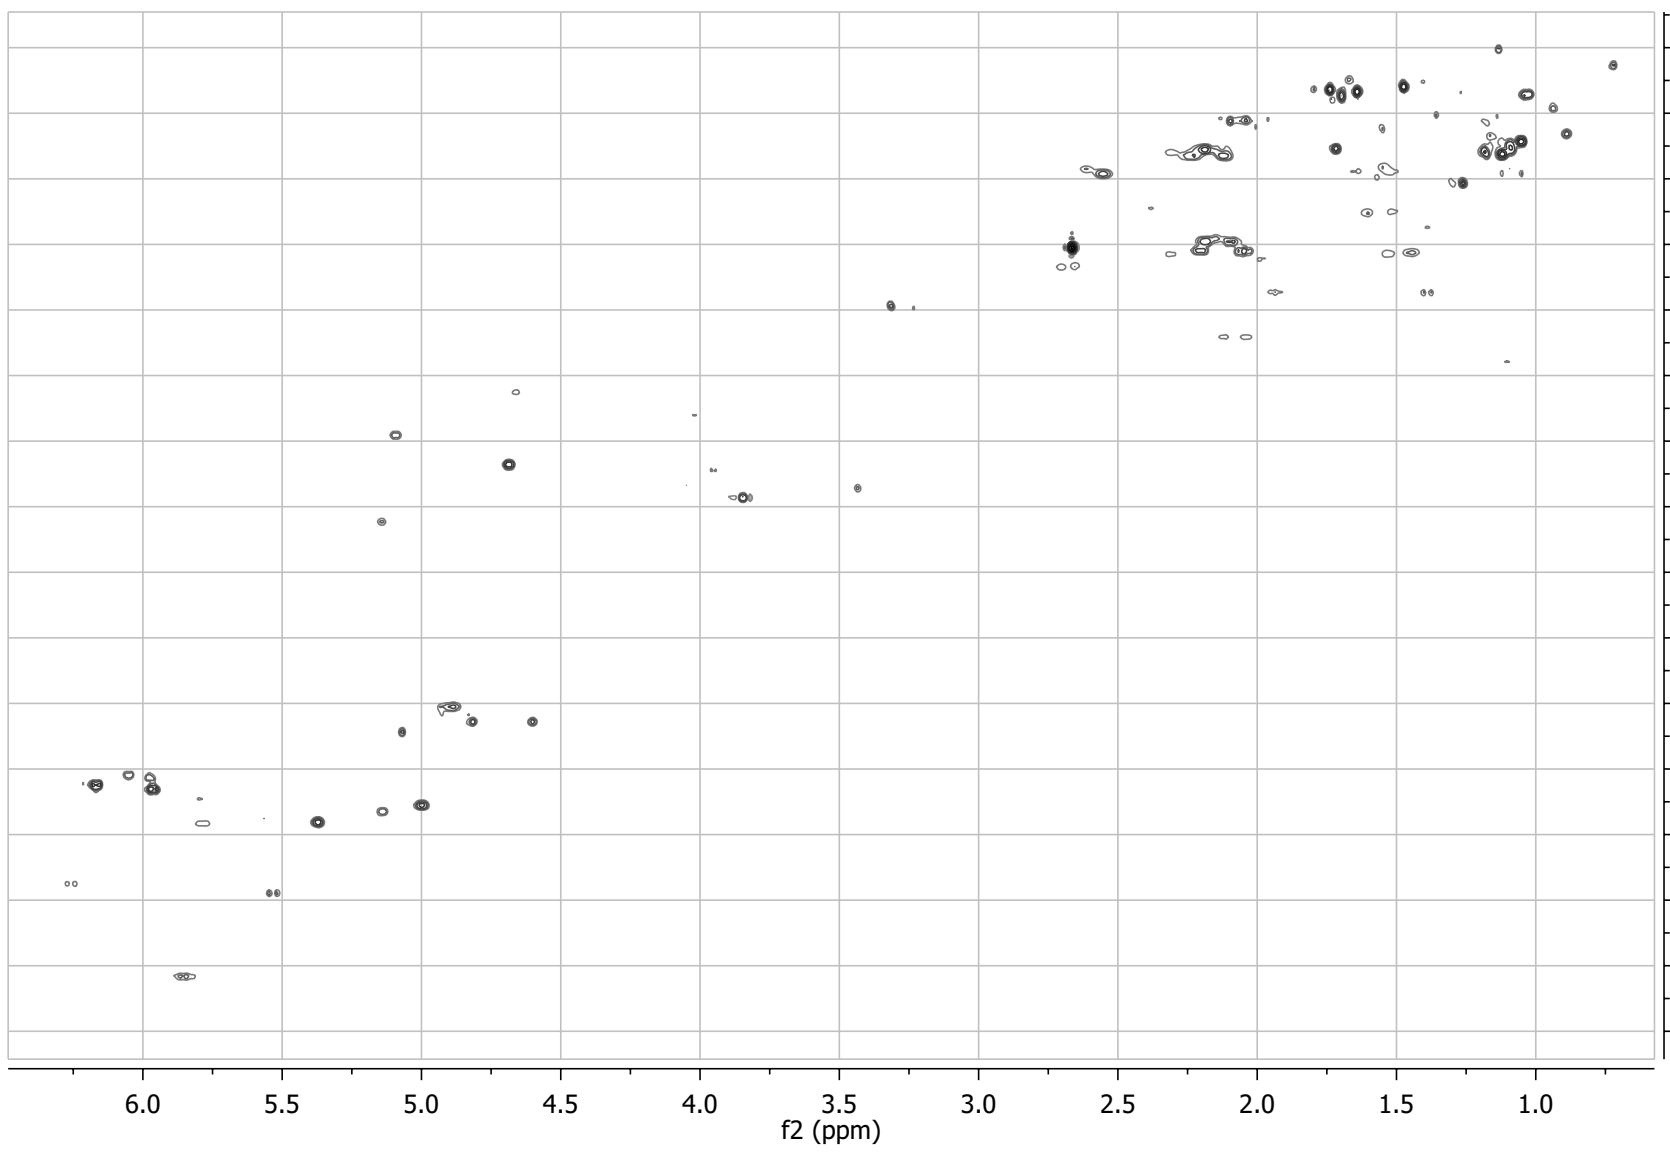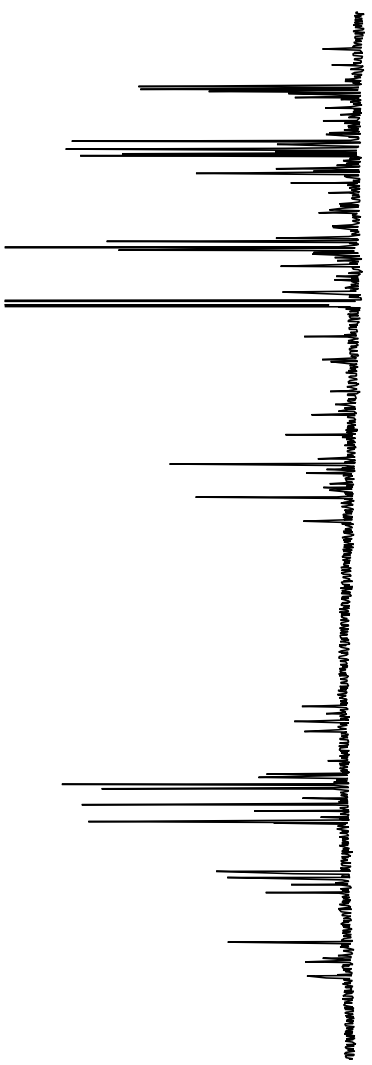

f1 (ppm)

f2 (ppm)

S69. HMBC NMR of sarcophytol-B in CD<sub>3</sub>OD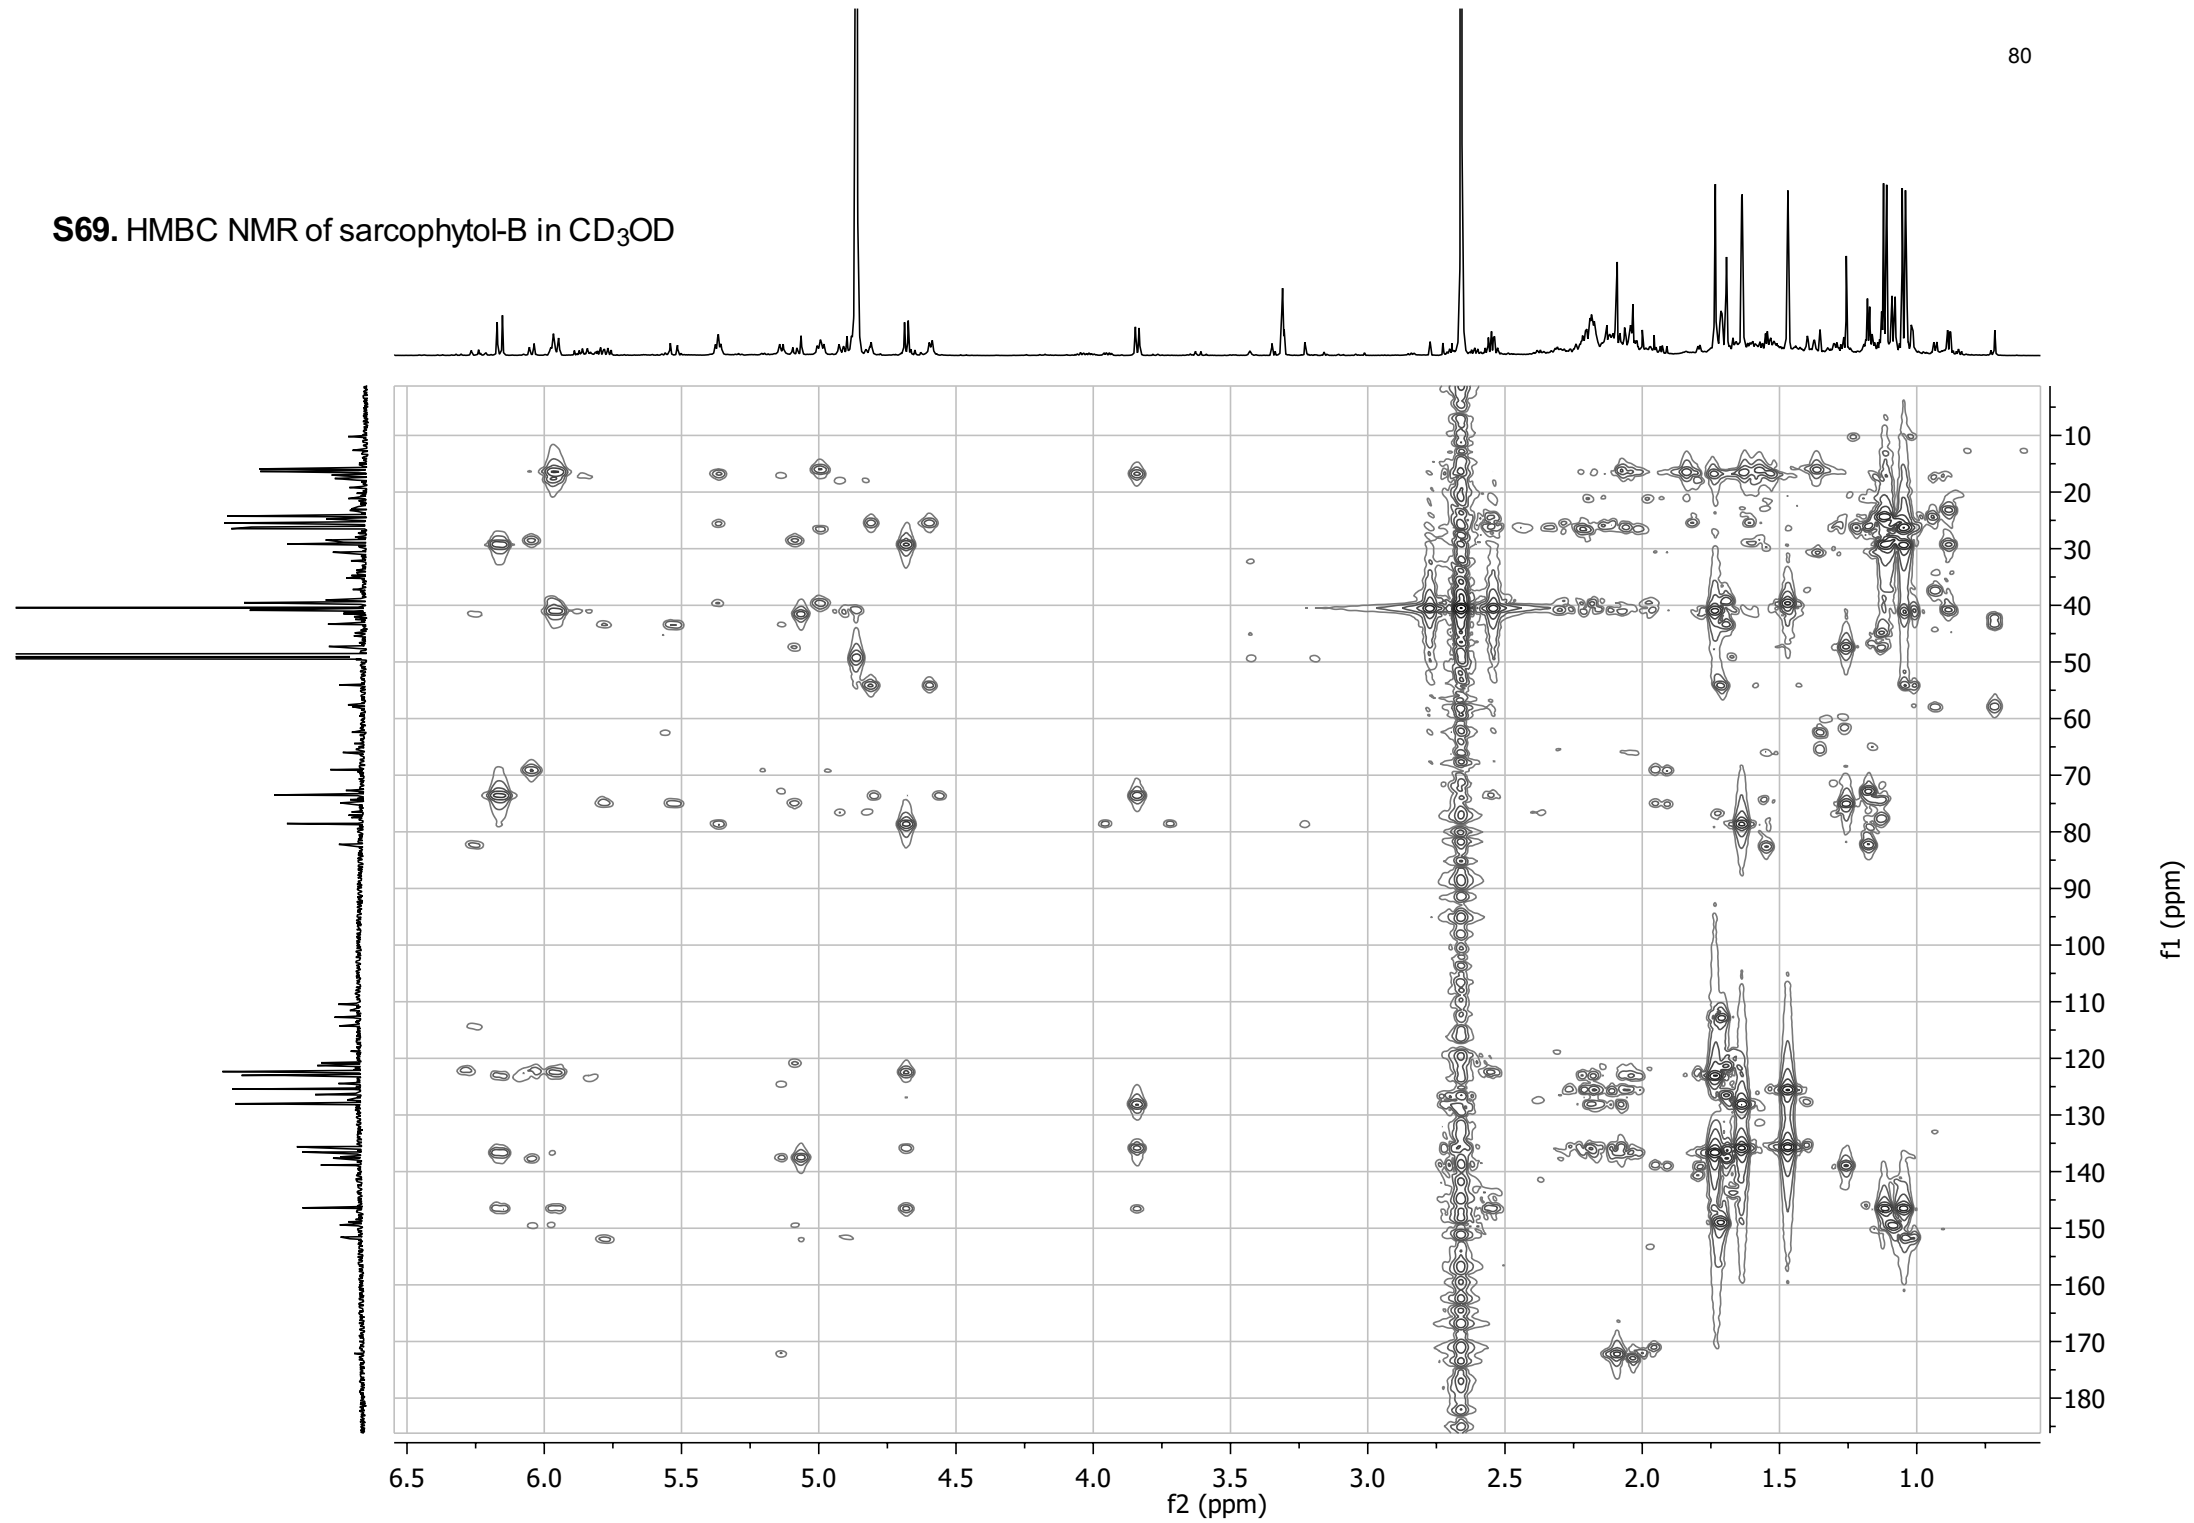



**Table S7.**  $^1\text{H}$  and  $^{13}\text{C}$  NMR data (300 MHz and 75 MHz,  $\text{CD}_3\text{OD}$ ) for sarcophytol-B.

| <b>o.</b> | <b><math>^{13}\text{C}</math><br/><math>\delta</math> (m)</b> | <b><math>^1\text{H}</math><br/><math>\delta</math> (m, J Hz)</b> | <b>COSY</b>                                                          | <b>gHMBC</b>                    |
|-----------|---------------------------------------------------------------|------------------------------------------------------------------|----------------------------------------------------------------------|---------------------------------|
| 1         | 146.4 (s)                                                     |                                                                  |                                                                      |                                 |
| 2         | 122.3(d)                                                      | 6.16 (1H, d, 11.5 )                                              | H-3, H-13                                                            | C-1, C-4, C-14, C-15            |
| 3         | 123.0 (d)                                                     | 5.96 (1H, d, 11.5)                                               | H-2, H-18                                                            | C-1, C-2, C-5, C-18             |
| 4         | 136.5 (s)                                                     |                                                                  |                                                                      |                                 |
| 5         | 26.6 (t)                                                      | 2.21 (1H, m)<br>2.05 (1H, m)                                     | H <sub>b</sub> -5, H <sub>b</sub> -6<br>H-7, H <sub>a</sub> -5       | C-3, C-6<br>C-3, C-4, C-6, C-18 |
| 6         | 40.9 (t)                                                      | 2.23 (1H, m)<br>2.11 (1H, m)                                     | H <sub>b</sub> -6, H-7<br>H-7, H <sub>a</sub> -5, H <sub>a</sub> -6  | C-7, C-8<br>C-5, C-7, C-8       |
| 7         | 125.4 (d)                                                     | 4.99 (1H, ddq, 1.1, 6.5, 8.5)                                    | H <sub>a</sub> -6, H <sub>b</sub> -6, H <sub>3</sub> -19             | C-6, C-10, C-19                 |
| 8         | 135.6 (s)                                                     |                                                                  |                                                                      |                                 |
| 9         | 39.5 (t)                                                      | 2.19 (1H, m)<br>2.09 (1H, m)                                     | H <sub>b</sub> -9<br>H-10, H <sub>a</sub> -9                         | C-7, C-8<br>C-8, C-11, C-19     |
| 10        | 25.8 (t)                                                      | 2.18 (2H, m)                                                     | H <sub>b</sub> -9, H-11                                              | C-11                            |
| 11        | 128.0 (d)                                                     | 5.37 (1H, tq, 1.0, 11.9)                                         | H <sub>a</sub> -10, H <sub>b</sub> -10, H-13, H <sub>3</sub> -<br>20 | C-9, C-10, C-13, C-21           |
| 12        | 135.7 (s)                                                     |                                                                  |                                                                      |                                 |
| 13        | 78.5 (d)                                                      | 3.84 (1H, d, 8.2)                                                | H-11, H-14                                                           | C-1, C-11, C-12, C-14, C-20     |
| 14        | 73.5 (d)                                                      | 4.68 (1H, d, 8.2)                                                | H-2, H-13                                                            | C-1, C-2, C-12, C-13, C-15      |
| 15        | 29.2(d)                                                       | 2.54 (1H, dq, 6.8, 13.7)                                         | H-16, H-17                                                           | C-1, C-2, C-14, C-16, C-17      |
| 16        | 24.2 (q)                                                      | 1.05 (3H, d, 6.8)                                                | H-15                                                                 | C-1, C-15, C-17                 |
| 17        | 26.2 (q)                                                      | 1.12 (3H, d, 6.8)                                                | H-15                                                                 | C-1, C-15, C-16                 |
| 18        | 16.3 (q)                                                      | 1.73 (3H, d, 1.0)                                                | H-3                                                                  | C-3, C-4, C-5                   |
| 19        | 15.9(q)                                                       | 1.47 (3H, brs)                                                   | H-7                                                                  | C-7, C-8, C-9                   |
| 20        | 16.7 (q)                                                      | 1.64 (3H, d, 1.1)                                                | H-11                                                                 | C-11, C-12, C-13                |



S71. <sup>13</sup>C NMR of 1(E),3(E),7(E)-11,12-epoxycembratrien-15-ol in CD<sub>3</sub>OD

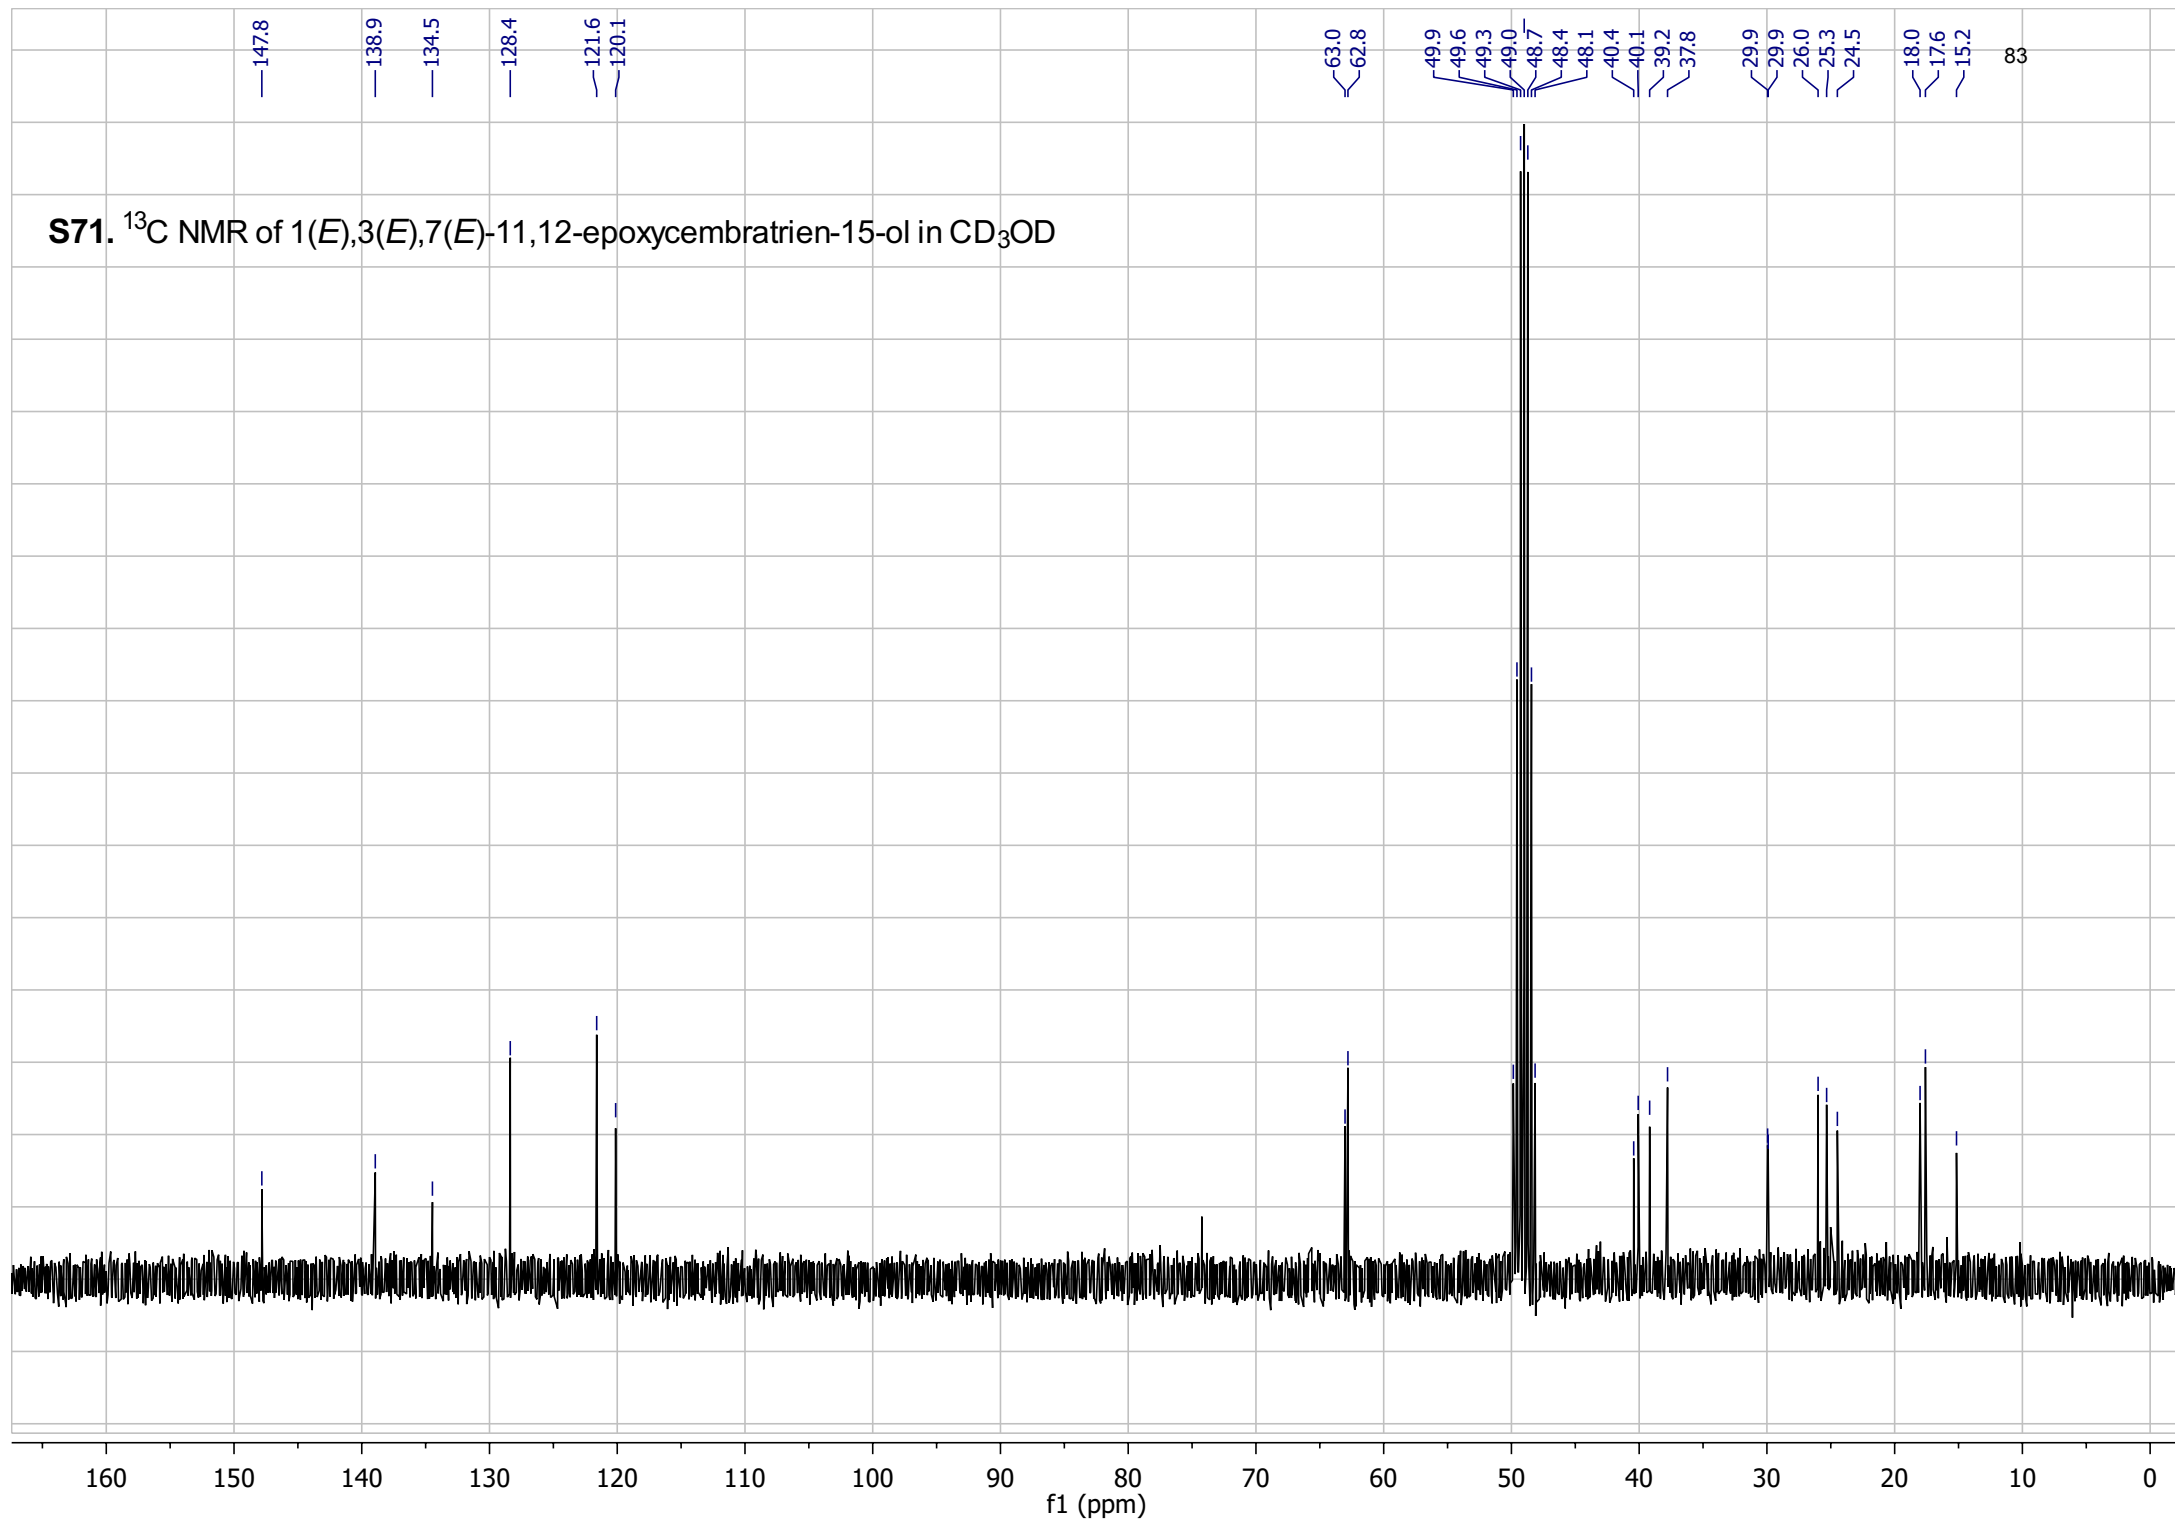

S72. DEPT NMR of 1(E),3(E),7(E)-11,12-epoxycembratrien-15-ol in CD<sub>3</sub>OD

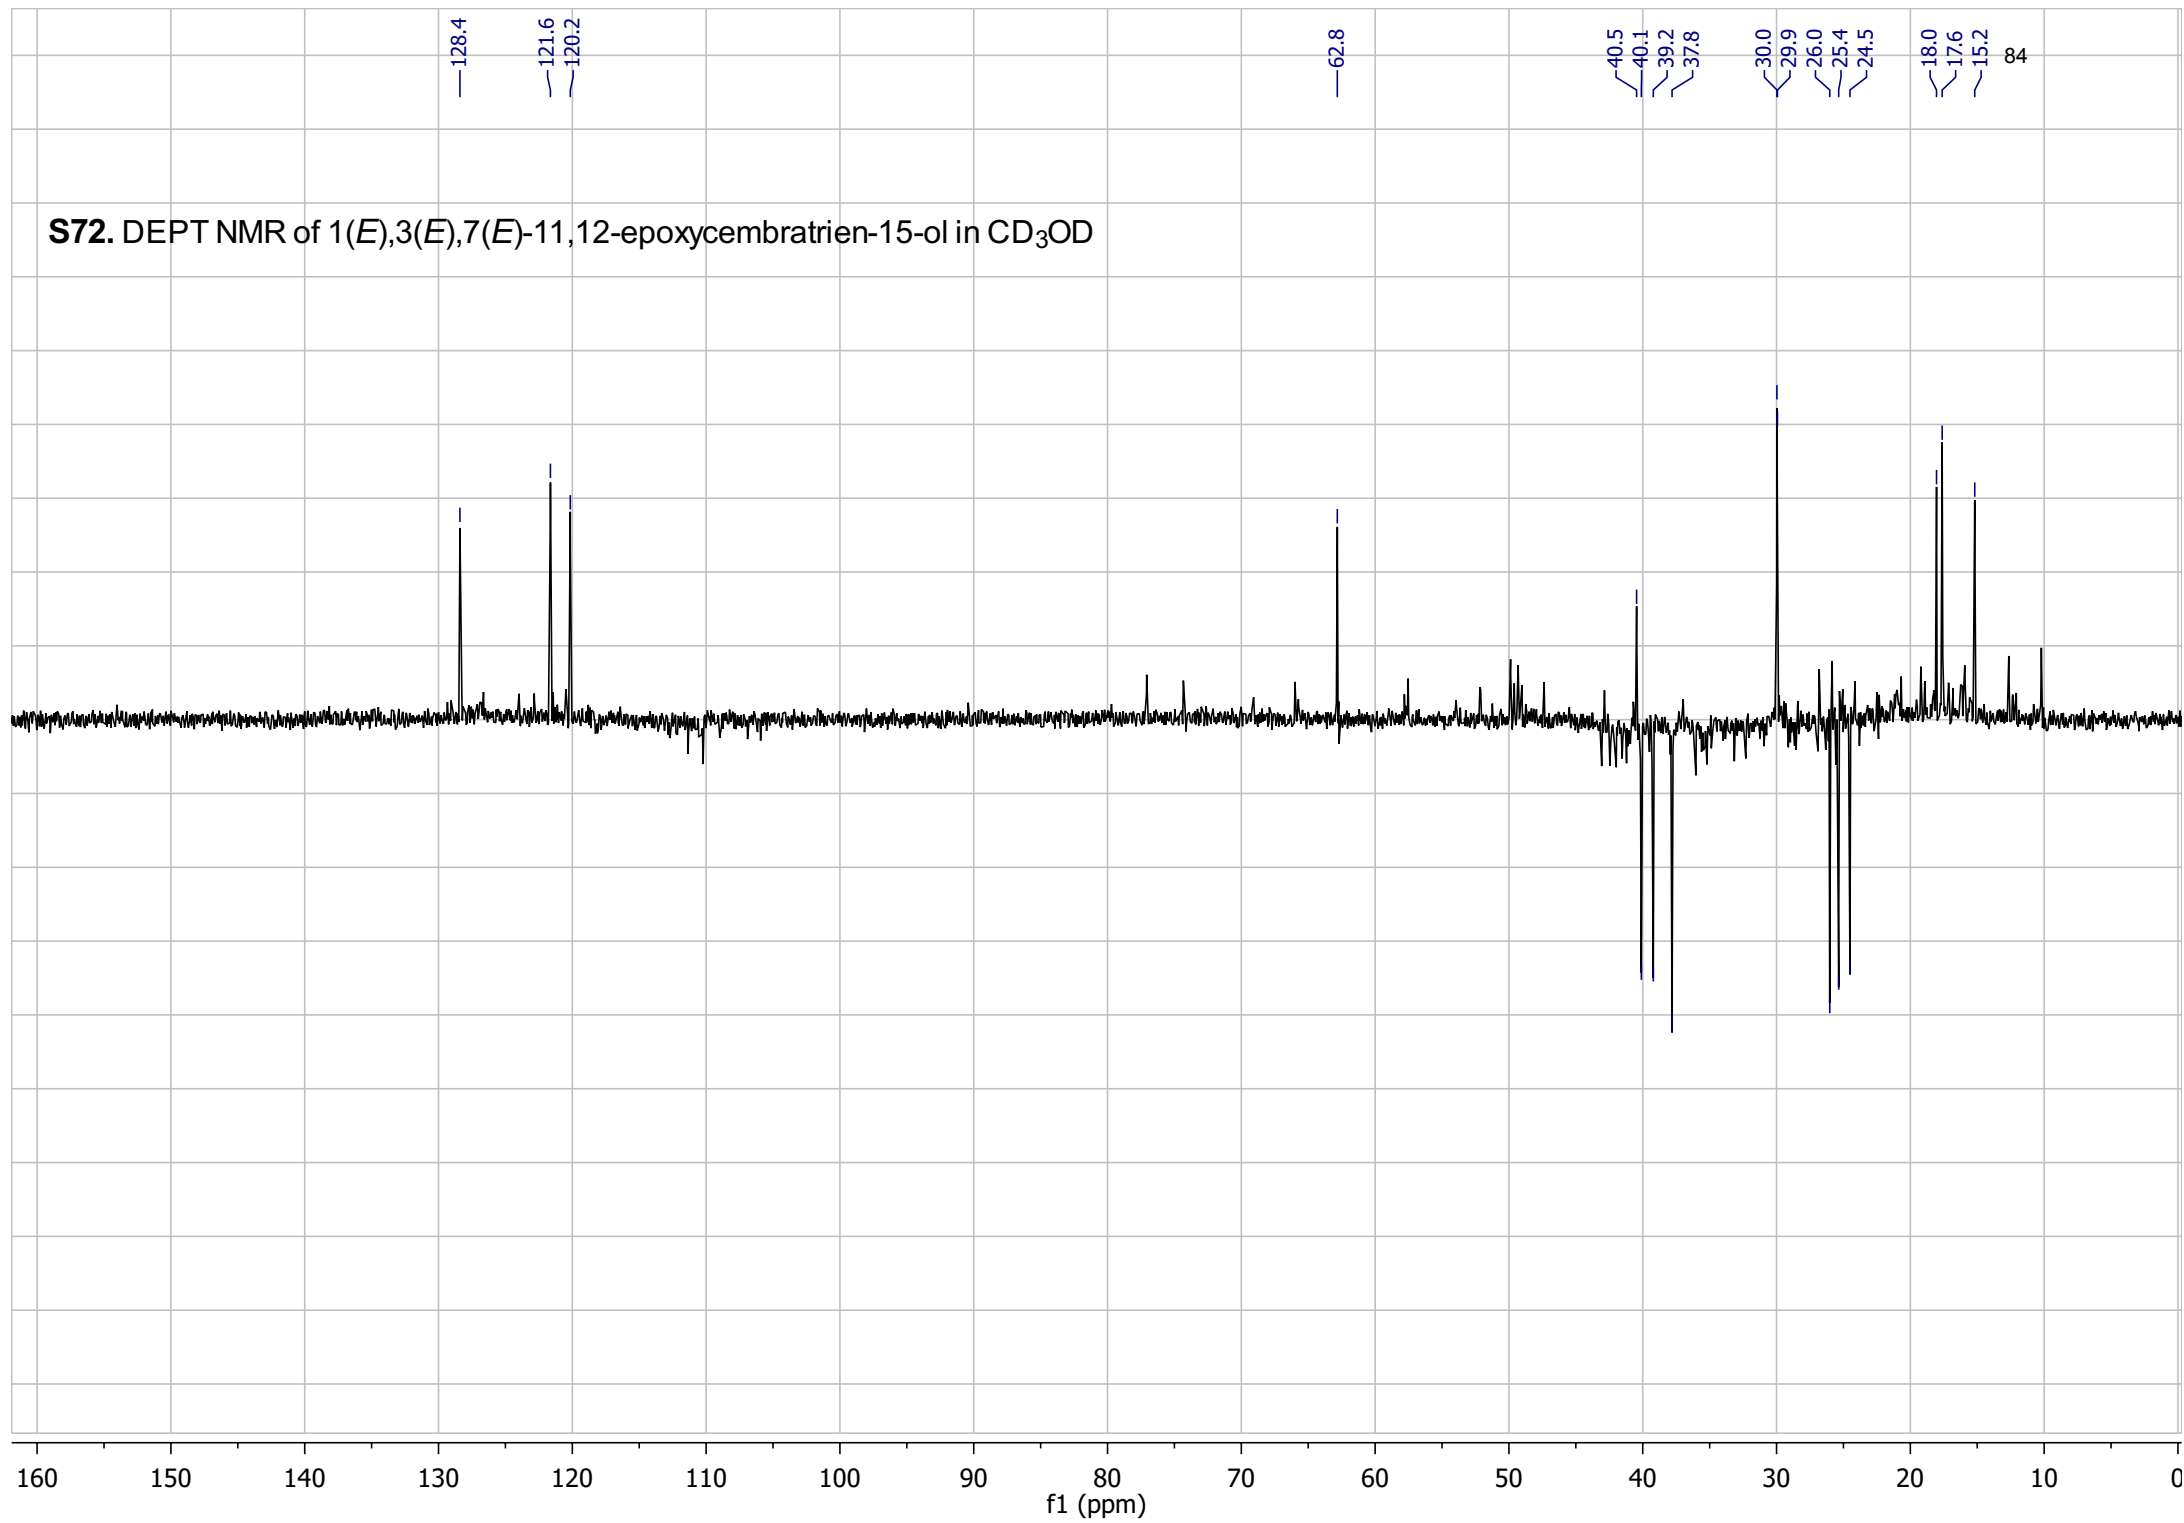

S73. COSY NMR of 1(E),3(E),7(E)-11,12-epoxycembratrien-15-ol in CD<sub>3</sub>OD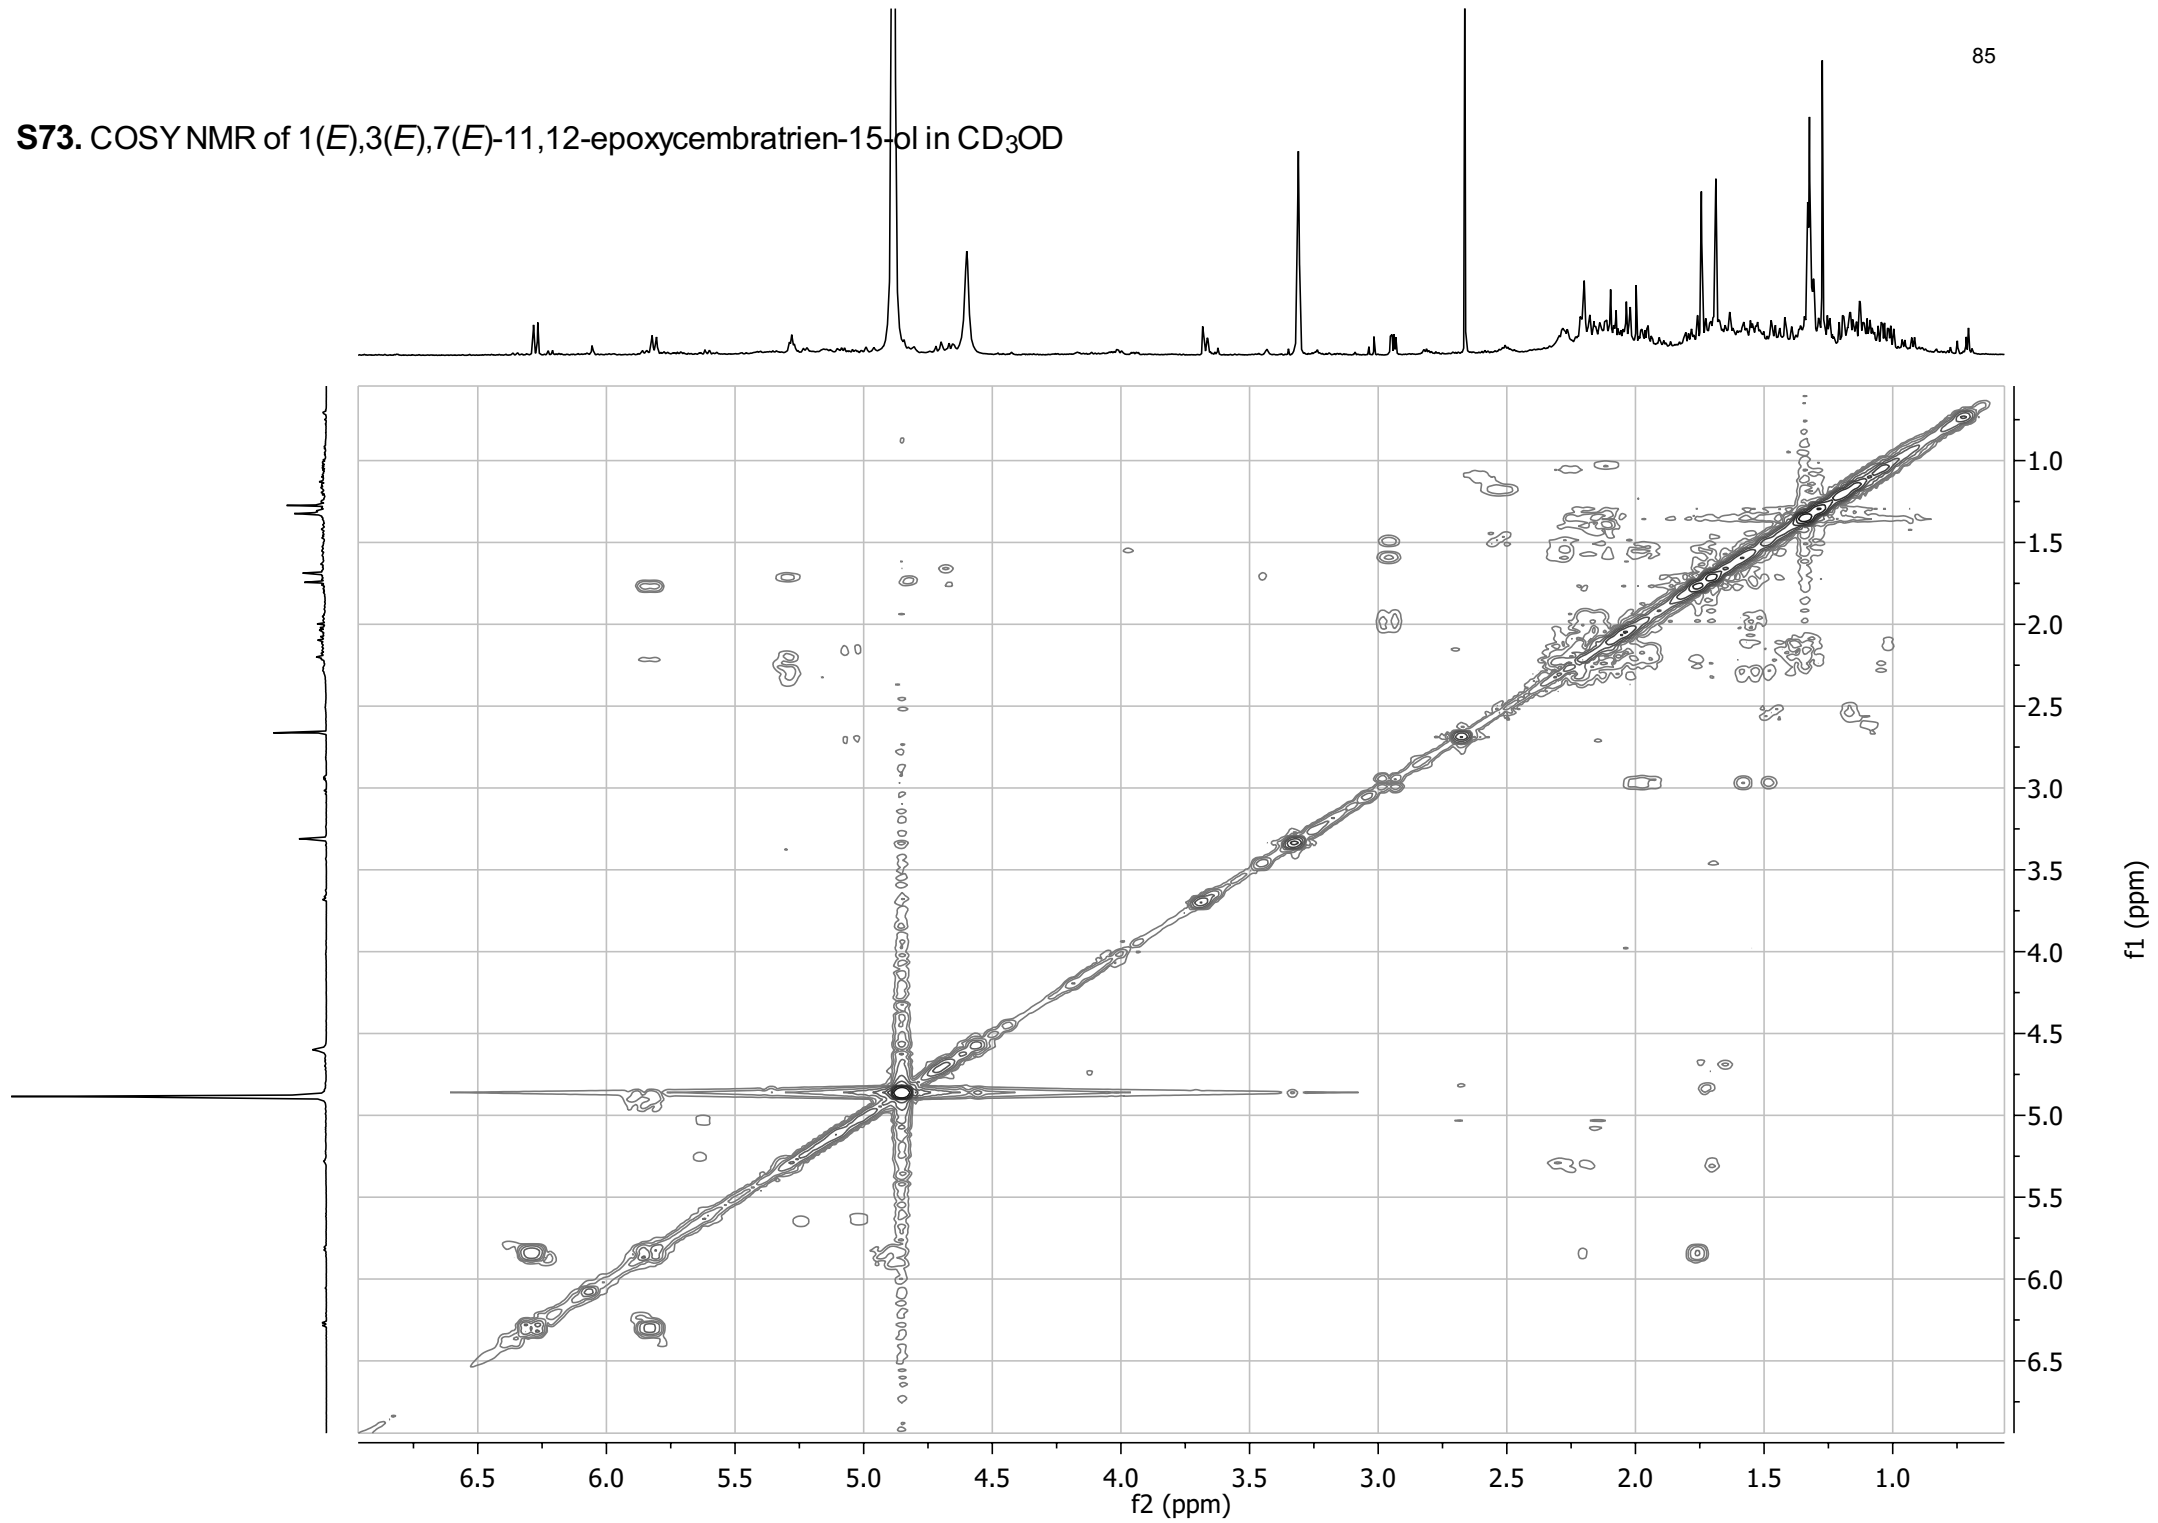

**S74.** HSQC NMR of 1(*E*),3(*E*),7(*E*)-11,12-epoxycembratrien-15-ol in CD<sub>3</sub>OD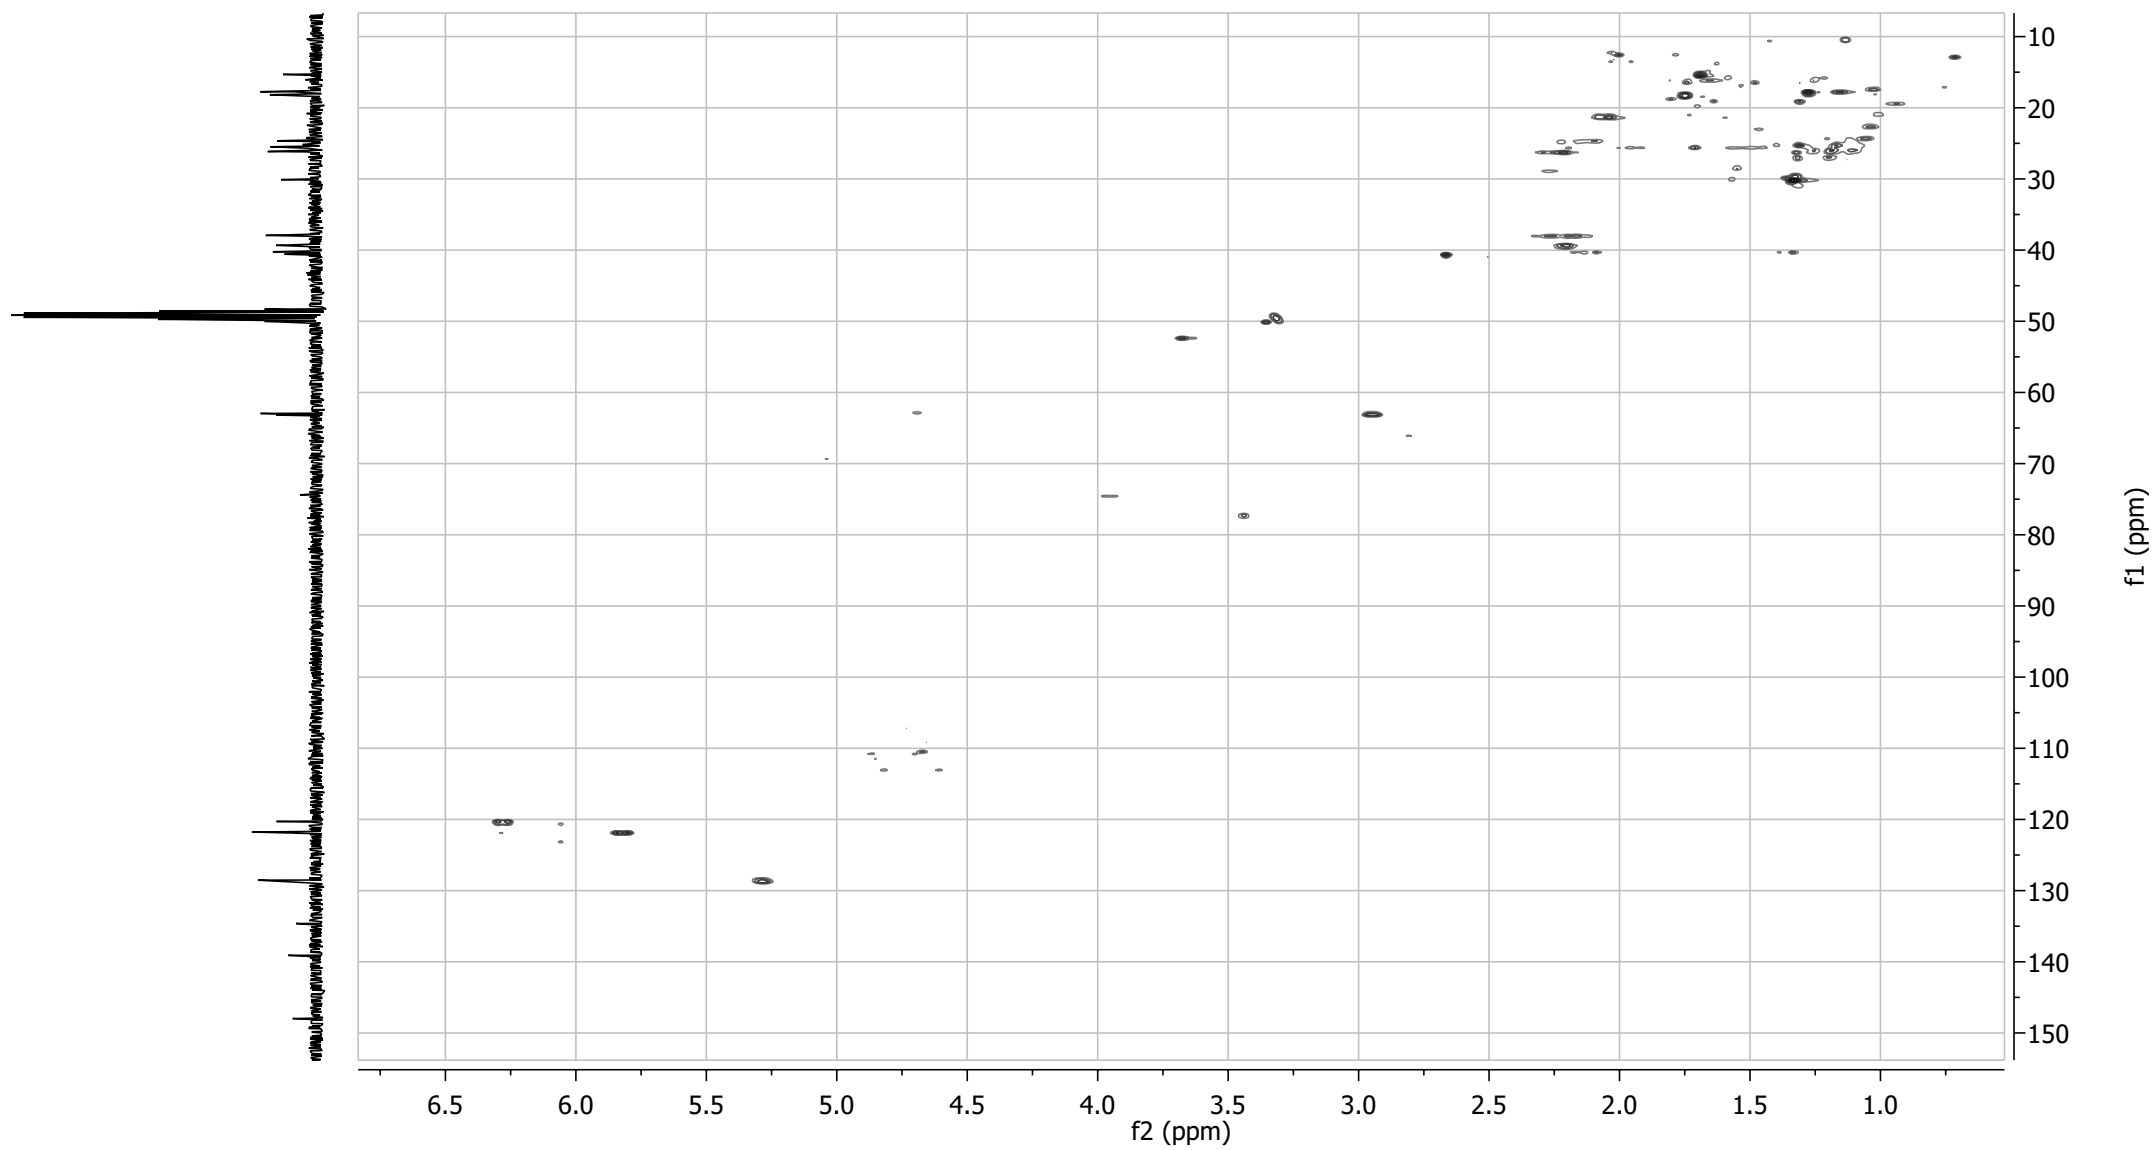

S75. HMBC NMR of 1(*E*),3(*E*),7(*E*)-11,12-epoxycembratrien-15-ol in CD<sub>3</sub>OD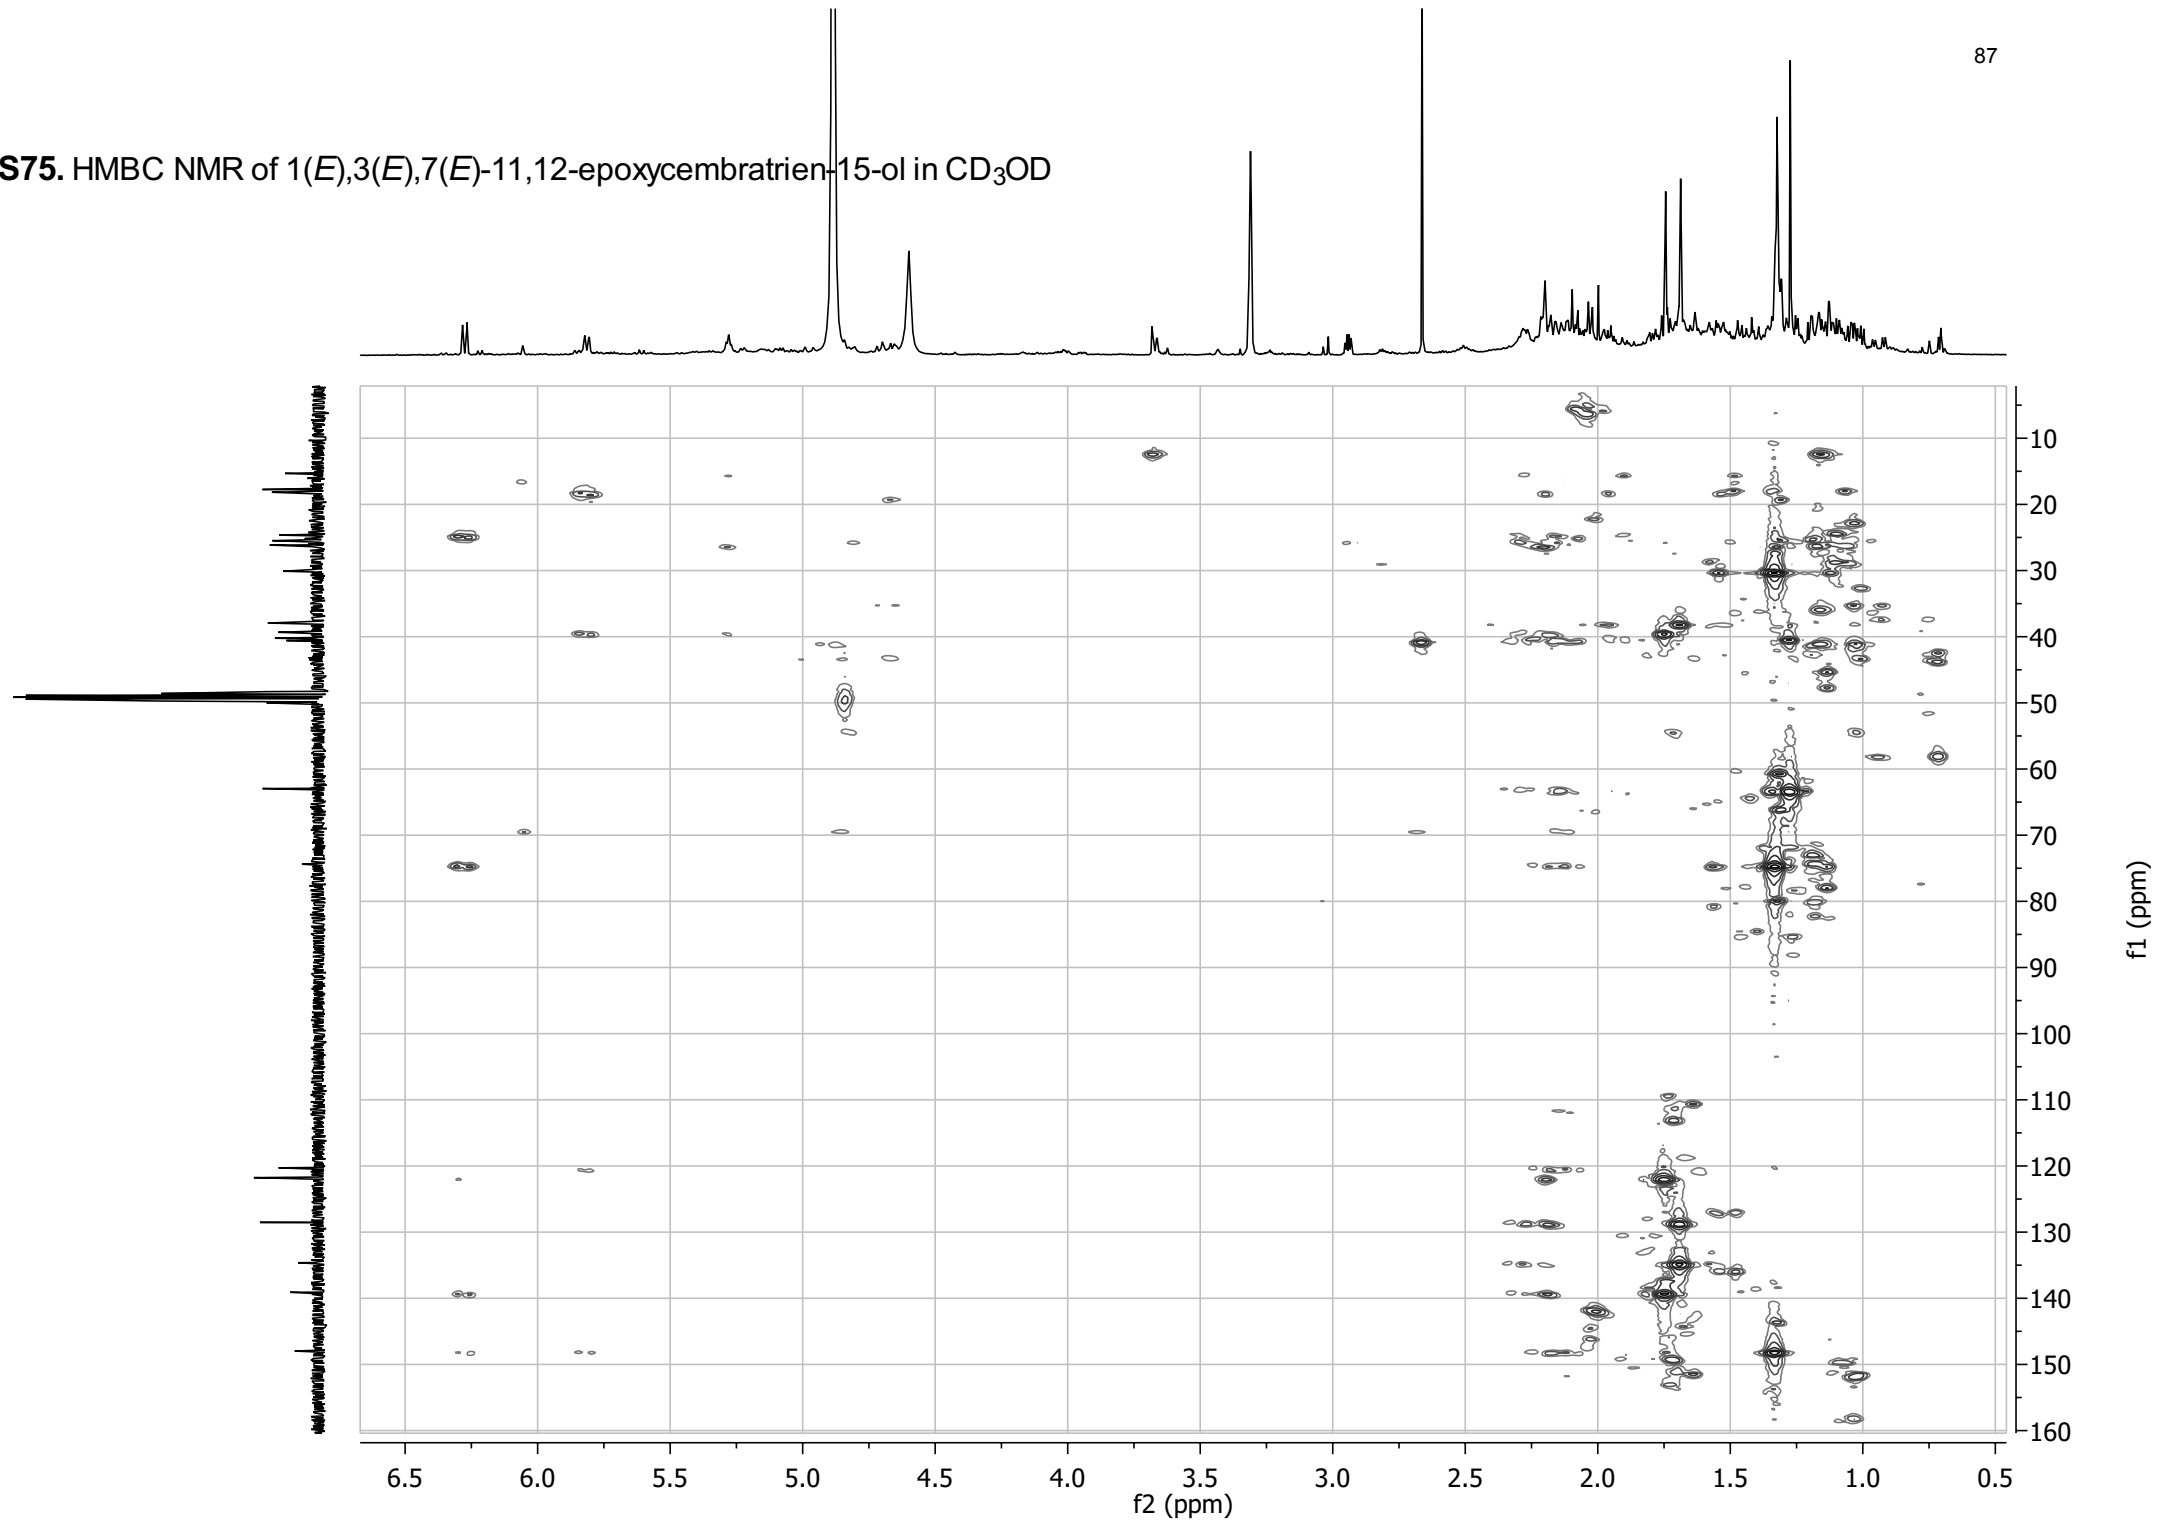

**Table S8.**  $^1\text{H}$  and  $^{13}\text{C}$  NMR data (300 MHz and 75 MHz,  $\text{CD}_3\text{OD}$ ) for 1(*E*),3(*E*),7(*E*)-11,12-epoxycembratrien-15-ol.

| o. | $^{13}\text{C}$<br>$\delta$ (m) | $^1\text{H}$<br>$\delta$ (m, J Hz) | COSY                                                                        | gHMBC                            |
|----|---------------------------------|------------------------------------|-----------------------------------------------------------------------------|----------------------------------|
| 1  | 147.8 (s)                       |                                    |                                                                             |                                  |
| 2  | 120.1(d)                        | 6.27 (1H, d, 10.1)                 | H-3                                                                         | C-1, C-3, C-4, C-14, C-15        |
| 3  | 121.6 (d)                       | 5.81 (1H, d, 10.1)                 | H-2, H-18                                                                   | C-1, C-2, C-5, C-18              |
| 4  | 138.9 (s)                       |                                    |                                                                             |                                  |
| 5  | 39.2 (t)                        | 2.20 (2H, m)                       | H <sub>a</sub> -6                                                           | C-3, C-4, C-6, C-18              |
| 6  | 26.0 (t)                        | 2.32 (1H, m)                       | H <sub>b</sub> -6, H-5                                                      | C-4, C-5, C-7, C-8               |
|    |                                 | 2.20 (1H, m)                       | H <sub>a</sub> -6                                                           | C-4, C-5, C-7, C-8               |
| 7  | 128.4 (d)                       | 5.28 (1H, brt, 5.7)                | H <sub>a</sub> -6, H <sub>b</sub> -6, H <sub>a</sub> -9, H <sub>3</sub> -19 | C-5, C-9, C-19                   |
| 8  | 134.5 (s)                       |                                    |                                                                             |                                  |
| 9  | 37.8 (t)                        | 2.26 (1H, m)                       | H-7, H <sub>b</sub> -9, H <sub>b</sub> -10                                  | C-7, C-8, C-10, C-11, C-19       |
|    |                                 | 2.21 (1H, m)                       | H <sub>a</sub> -9                                                           |                                  |
| 10 | 25.3 (t)                        | 1.96 (1H, m)                       | H <sub>b</sub> -9, H <sub>b</sub> -10, H-11                                 | C-9, C-13, C-20                  |
|    |                                 | 1.53 (1H, m)                       | H <sub>a</sub> -9, H <sub>a</sub> -10, H-11                                 | C-11                             |
| 11 | 62.8 (d)                        | 2.94 (1H, dd, 3.9, 8.8)            | H <sub>a</sub> -10, H <sub>b</sub> -10                                      | C-10                             |
| 12 | 63.0 (s)                        |                                    |                                                                             |                                  |
| 13 | 40.0 (t)                        | 2.11 (1H, m)                       | H <sub>b</sub> -13                                                          | C-1, C-2, C-11, C-12, C-13, C-15 |
|    |                                 | 1.35 (1H, m)                       | H <sub>a</sub> -13, H-14                                                    | C-11, C-12, C-14                 |
| 14 | 24.5 (t)                        | 2.13(2H, m)                        | H <sub>b</sub> -13                                                          | C-1, C-2, C-12, C-13, C-15       |
| 15 | 74.2(s)                         |                                    |                                                                             |                                  |
| 16 | 29.9 (q)                        | 1.32 (3H, s)                       |                                                                             | C-1, C-14, C-15                  |
| 17 | 30.0 (q)                        | 1.32 (3H, s)                       |                                                                             | C-1, C-14, C-15                  |
| 18 | 18.0 (q)                        | 1.74 (3H, brs)                     | H-3                                                                         | C-3, C-4, C-5                    |
| 19 | 15.2(q)                         | 1.69 (3H, brs)                     | H-7                                                                         | C-7, C-8, C-9                    |
| 20 | 17.6 (q)                        | 1.27 (3H, s)                       |                                                                             | C-11, C-12, C-13                 |
